# Supplementary material for: Identify Candidate Genes Associated with the Weight and Egg Quality Traits in Wenshui Green Shell-Laying Chickens by the Copy Number Variation-Based Genome-Wide Association Study
Source: MDPI journal article supplement (doi:10.3390/vetsci11020076), 2024-02-06
Supplement: s1 [file s1]

**Table S1.** Number of phenotypes, mean, minimum, maximum, standard deviation and standard error of traits.

| <b>trait</b> | <b>Number of individuals<br/>examined</b> | <b>maximum</b> | <b>minimum</b> | <b>averages</b> | <b>standard<br/>deviation</b> | <b>standard<br/>error</b> |
|--------------|-------------------------------------------|----------------|----------------|-----------------|-------------------------------|---------------------------|
| 30-EW(g)     | 789                                       | 58.90          | 34.87          | 46.15           | 3.25                          | 0.1158                    |
| 30-ESI       | 788                                       | 1.47           | 1.17           | 1.30            | 0.04                          | 0.0016                    |
| 40-EW(g)     | 772                                       | 67.92          | 37.41          | 49.36           | 3.84                          | 0.1381                    |
| 40-ESI       | 772                                       | 1.54           | 1.11           | 1.31            | 0.06                          | 0.0021                    |
| 40-YC        | 762                                       | 12.60          | 5.90           | 8.71            | 0.67                          | 0.0241                    |
| 40-EWH(mm)   | 763                                       | 7.00           | 2.20           | 3.99            | 0.85                          | 0.0307                    |
| 40-SH(mm)    | 771                                       | 0.39           | 0.22           | 0.31            | 0.03                          | 0.0962                    |
| 40-SS(N/cm2) | 769                                       | 51.41          | 13.06          | 37.53           | 7.76                          | 0.2799                    |
| 40-YW(g)     | 759                                       | 20.28          | 9.86           | 16.02           | 1.28                          | 0.0465                    |
| 40-SW(g)     | 771                                       | 7.02           | 3.32           | 5.21            | 0.56                          | 0.0201                    |
| 40-EWW(g)    | 759                                       | 44.37          | 19.97          | 28.13           | 2.99                          | 0.1085                    |
| 40-YR        | 759                                       | 0.40           | 0.24           | 0.33            | 0.02                          | 0.0008                    |
| 40-SR        | 771                                       | 0.14           | 0.05           | 0.11            | 0.01                          | 0.0004                    |
| 40-EWR       | 759                                       | 0.66           | 0.48           | 0.57            | 0.03                          | 0.0009                    |
| 40-EWL       | 718                                       | 137.65         | 60.02          | 92.45           | 10.12                         | 0.3778                    |
| 40-EWS       | 718                                       | 103.93         | 51.63          | 71.86           | 7.56                          | 0.2822                    |
| 40-HU        | 763                                       | 86.75          | 40.03          | 63.55           | 8.19                          | 0.2965                    |
| BW(g)        | 809                                       | 41.72          | 25.00          | 33.34           | 2.68                          | 0.0941                    |
| 4-W(g)       | 813                                       | 408.00         | 174.00         | 272.10          | 28.39                         | 0.9957                    |
| 8-W(g)       | 785                                       | 815.00         | 320.00         | 536.38          | 62.85                         | 2.2433                    |
| 13-W(g)      | 808                                       | 1,300.00       | 550.00         | 932.30          | 99.24                         | 3.4911                    |
| 15-W(g)      | 745                                       | 1,500.00       | 650.00         | 1,188.52        | 117.09                        | 4.2899                    |
| 38-W(g)      | 832                                       | 2,668.00       | 1,100.00       | 1,707.98        | 237.77                        | 8.2433                    |
