# Supplementary material for: Identify Candidate Genes Associated with the Weight and Egg Quality Traits in Wenshui Green Shell-Laying Chickens by the Copy Number Variation-Based Genome-Wide Association Study
Source: MDPI journal article supplement (doi:10.3390/vetsci11020076), 2024-02-06
Supplement: s1 [file s1]

**Table S2.** Detail information of detected CNVR.

| CNVR ID     | Chr  | Start     | End       | Size   | Description |
|-------------|------|-----------|-----------|--------|-------------|
| DEL00000000 | chr1 | 892       | 1,543     | 651    | Loss        |
| DUP00000138 | chr1 | 126,916   | 139,367   | 12,451 | Gain        |
| DEL00000207 | chr1 | 243,133   | 243,439   | 306    | Loss        |
| DUP00000233 | chr1 | 249,688   | 250,011   | 323    | Gain        |
| DUP00000311 | chr1 | 290,728   | 354,892   | 64,164 | Mixed       |
| DEL00000504 | chr1 | 455,861   | 456,033   | 172    | Loss        |
| DEL00000512 | chr1 | 492,481   | 492,703   | 222    | Loss        |
| DUP00000519 | chr1 | 519,681   | 519,877   | 196    | Gain        |
| DEL00000525 | chr1 | 528,335   | 528,442   | 107    | Loss        |
| DEL00000532 | chr1 | 569,535   | 569,639   | 104    | Loss        |
| DUP00000540 | chr1 | 589,727   | 590,334   | 607    | Gain        |
| DEL00000563 | chr1 | 740,685   | 740,895   | 210    | Loss        |
| DUP00000566 | chr1 | 745,074   | 745,375   | 301    | Gain        |
| DEL00000597 | chr1 | 761,327   | 761,548   | 221    | Mixed       |
| DUP00000617 | chr1 | 790,558   | 790,688   | 130    | Gain        |
| DEL00000631 | chr1 | 803,372   | 803,426   | 54     | Loss        |
| DUP00000633 | chr1 | 809,822   | 811,090   | 1,268  | Mixed       |
| DEL00000808 | chr1 | 955,646   | 956,636   | 990    | Loss        |
| DUP00000834 | chr1 | 965,060   | 965,828   | 768    | Mixed       |
| DUP00000853 | chr1 | 994,376   | 995,043   | 667    | Gain        |
| DEL00000881 | chr1 | 1,114,496 | 1,115,153 | 657    | Loss        |
| DEL00000888 | chr1 | 1,135,548 | 1,136,085 | 537    | Loss        |
| DUP00000890 | chr1 | 1,139,442 | 1,139,656 | 214    | Gain        |
| DEL00000892 | chr1 | 1,160,833 | 1,161,182 | 349    | Loss        |
| DUP00000896 | chr1 | 1,236,958 | 1,237,678 | 720    | Gain        |
| DEL00000904 | chr1 | 1,341,898 | 1,341,975 | 77     | Loss        |
| DEL00000913 | chr1 | 1,721,750 | 1,722,606 | 856    | Loss        |
| DEL00000914 | chr1 | 1,756,025 | 1,756,144 | 119    | Loss        |
| DEL00000916 | chr1 | 1,831,402 | 1,831,478 | 76     | Loss        |
| DEL00000918 | chr1 | 1,892,717 | 1,894,912 | 2,195  | Loss        |
| DEL00000938 | chr1 | 2,177,924 | 2,178,320 | 396    | Loss        |
| DEL00000939 | chr1 | 2,183,040 | 2,183,253 | 213    | Loss        |
| DEL00000942 | chr1 | 2,263,736 | 2,264,543 | 807    | Loss        |
| DEL00000945 | chr1 | 2,296,073 | 2,296,338 | 265    | Loss        |
| DEL00000947 | chr1 | 2,481,957 | 2,482,777 | 820    | Loss        |
| DEL00000956 | chr1 | 2,654,111 | 2,654,295 | 184    | Loss        |
| DEL00000959 | chr1 | 2,745,958 | 2,746,459 | 501    | Loss        |
| DEL00000960 | chr1 | 2,759,061 | 2,759,157 | 96     | Loss        |
| DEL00000963 | chr1 | 2,861,047 | 2,861,120 | 73     | Loss        |
| DEL00000966 | chr1 | 3,028,284 | 3,028,931 | 647    | Loss        |
| DEL00000967 | chr1 | 3,030,621 | 3,030,785 | 164    | Loss        |
| DEL00000971 | chr1 | 3,096,719 | 3,096,930 | 211    | Loss        |
| DEL00000973 | chr1 | 3,130,190 | 3,130,287 | 97     | Loss        |
| DEL00000980 | chr1 | 3,355,087 | 3,439,927 | 84,840 | Loss        |
| DEL00000996 | chr1 | 3,532,688 | 3,533,318 | 630    | Loss        |
| DEL00000998 | chr1 | 3,658,564 | 3,658,978 | 414    | Loss        |

|             |      |           |           |       |      |
|-------------|------|-----------|-----------|-------|------|
| DEL00000999 | chr1 | 3,666,405 | 3,666,706 | 301   | Loss |
| DUP00001001 | chr1 | 3,722,289 | 3,722,663 | 374   | Gain |
| DUP00001005 | chr1 | 3,763,086 | 3,763,192 | 106   | Gain |
| DEL00001010 | chr1 | 3,933,544 | 3,933,917 | 373   | Loss |
| DEL00001013 | chr1 | 3,946,613 | 3,947,173 | 560   | Loss |
| DEL00001015 | chr1 | 4,013,201 | 4,013,458 | 257   | Loss |
| DEL00001016 | chr1 | 4,059,093 | 4,059,860 | 767   | Loss |
| DEL00001018 | chr1 | 4,147,048 | 4,147,141 | 93    | Loss |
| DEL00001019 | chr1 | 4,178,857 | 4,178,987 | 130   | Loss |
| DEL00001022 | chr1 | 4,241,231 | 4,241,321 | 90    | Loss |
| DEL00001025 | chr1 | 4,365,026 | 4,365,550 | 524   | Loss |
| DEL00001026 | chr1 | 4,365,785 | 4,365,850 | 65    | Loss |
| DUP00001029 | chr1 | 4,451,956 | 4,452,081 | 125   | Gain |
| DEL00001030 | chr1 | 4,464,765 | 4,465,870 | 1,105 | Loss |
| DEL00001031 | chr1 | 4,490,562 | 4,490,613 | 51    | Loss |
| DEL00001034 | chr1 | 4,612,112 | 4,612,286 | 174   | Loss |
| DEL00001049 | chr1 | 4,794,550 | 4,794,666 | 116   | Loss |
| DEL00001052 | chr1 | 4,860,096 | 4,860,214 | 118   | Loss |
| DEL00001053 | chr1 | 4,860,277 | 4,860,392 | 115   | Loss |
| DEL00001054 | chr1 | 4,880,381 | 4,880,564 | 183   | Loss |
| DEL00001055 | chr1 | 4,891,739 | 4,892,225 | 486   | Loss |
| DEL00001058 | chr1 | 5,005,775 | 5,005,904 | 129   | Loss |
| DEL00001060 | chr1 | 5,057,109 | 5,057,231 | 122   | Loss |
| DEL00001062 | chr1 | 5,119,646 | 5,120,745 | 1,099 | Loss |
| DEL00001065 | chr1 | 5,166,443 | 5,166,539 | 96    | Loss |
| DEL00001072 | chr1 | 5,447,856 | 5,447,914 | 58    | Loss |
| DEL00001075 | chr1 | 5,483,254 | 5,483,375 | 121   | Loss |
| DEL00001080 | chr1 | 5,696,402 | 5,696,997 | 595   | Loss |
| DEL00001084 | chr1 | 5,795,461 | 5,795,925 | 464   | Loss |
| DEL00001088 | chr1 | 5,844,874 | 5,846,070 | 1,196 | Loss |
| DEL00001091 | chr1 | 5,859,216 | 5,859,493 | 277   | Loss |
| DEL00001092 | chr1 | 5,868,711 | 5,868,762 | 51    | Loss |
| DEL00001095 | chr1 | 5,933,799 | 5,934,237 | 438   | Loss |
| DEL00001096 | chr1 | 5,980,819 | 5,980,968 | 149   | Loss |
| DUP00001108 | chr1 | 6,413,076 | 6,413,203 | 127   | Gain |
| DEL00001117 | chr1 | 6,819,299 | 6,828,675 | 9,376 | Loss |
| DEL00001118 | chr1 | 6,853,475 | 6,854,055 | 580   | Loss |
| DEL00001119 | chr1 | 6,864,345 | 6,864,963 | 618   | Loss |
| DEL00001120 | chr1 | 7,036,895 | 7,037,705 | 810   | Loss |
| DEL00001121 | chr1 | 7,044,477 | 7,044,602 | 125   | Loss |
| DEL00001123 | chr1 | 7,162,152 | 7,162,605 | 453   | Loss |
| DEL00001150 | chr1 | 7,327,796 | 7,328,032 | 236   | Loss |
| DEL00001151 | chr1 | 7,348,888 | 7,349,414 | 526   | Loss |
| DEL00001156 | chr1 | 7,413,551 | 7,413,728 | 177   | Loss |
| DEL00001160 | chr1 | 7,489,562 | 7,489,613 | 51    | Loss |
| DEL00001163 | chr1 | 7,531,607 | 7,531,668 | 61    | Loss |
| DUP00001165 | chr1 | 7,627,826 | 7,627,907 | 81    | Gain |
| DEL00001168 | chr1 | 7,667,038 | 7,667,150 | 112   | Loss |
| DEL00001172 | chr1 | 7,754,413 | 7,754,795 | 382   | Loss |

|             |      |            |            |       |      |
|-------------|------|------------|------------|-------|------|
| DEL00001174 | chr1 | 7,765,039  | 7,765,229  | 190   | Loss |
| DEL00001178 | chr1 | 7,875,784  | 7,875,986  | 202   | Loss |
| DEL00001185 | chr1 | 7,939,805  | 7,939,868  | 63    | Loss |
| DEL00001187 | chr1 | 7,966,536  | 7,967,080  | 544   | Loss |
| DEL00001190 | chr1 | 8,011,293  | 8,011,779  | 486   | Loss |
| DEL00001194 | chr1 | 8,033,733  | 8,034,005  | 272   | Loss |
| DEL00001205 | chr1 | 8,226,627  | 8,227,043  | 416   | Loss |
| DEL00001206 | chr1 | 8,228,285  | 8,229,071  | 786   | Loss |
| DEL00001208 | chr1 | 8,253,868  | 8,253,968  | 100   | Loss |
| DEL00001213 | chr1 | 8,425,965  | 8,426,482  | 517   | Loss |
| DEL00001214 | chr1 | 8,428,165  | 8,435,271  | 7,106 | Loss |
| DEL00001220 | chr1 | 8,674,754  | 8,675,255  | 501   | Loss |
| DEL00001221 | chr1 | 8,683,128  | 8,683,343  | 215   | Loss |
| DEL00001222 | chr1 | 8,704,088  | 8,704,278  | 190   | Loss |
| DEL00001225 | chr1 | 8,754,965  | 8,755,029  | 64    | Loss |
| DEL00001226 | chr1 | 8,769,245  | 8,770,345  | 1,100 | Loss |
| DEL00001227 | chr1 | 8,843,011  | 8,843,192  | 181   | Loss |
| DEL00001230 | chr1 | 8,920,332  | 8,920,981  | 649   | Loss |
| DEL00001232 | chr1 | 8,989,690  | 8,989,749  | 59    | Loss |
| DEL00001238 | chr1 | 9,145,387  | 9,145,445  | 58    | Loss |
| DEL00001243 | chr1 | 9,272,270  | 9,272,343  | 73    | Loss |
| DEL00001244 | chr1 | 9,301,264  | 9,301,360  | 96    | Loss |
| DEL00001247 | chr1 | 9,453,577  | 9,453,664  | 87    | Loss |
| DEL00001248 | chr1 | 9,481,968  | 9,482,172  | 204   | Loss |
| DEL00001253 | chr1 | 9,602,136  | 9,602,309  | 173   | Loss |
| DEL00001254 | chr1 | 9,621,627  | 9,621,695  | 68    | Loss |
| DEL00001258 | chr1 | 9,644,872  | 9,645,624  | 752   | Loss |
| DEL00001262 | chr1 | 9,729,363  | 9,729,692  | 329   | Loss |
| DEL00001263 | chr1 | 9,732,588  | 9,732,752  | 164   | Loss |
| DEL00001264 | chr1 | 9,780,413  | 9,781,586  | 1,173 | Loss |
| DEL00001266 | chr1 | 9,787,887  | 9,788,389  | 502   | Loss |
| DEL00001279 | chr1 | 10,133,647 | 10,134,115 | 468   | Loss |
| DEL00001280 | chr1 | 10,138,092 | 10,138,312 | 220   | Loss |
| DEL00001281 | chr1 | 10,148,100 | 10,148,177 | 77    | Loss |
| DEL00001283 | chr1 | 10,193,722 | 10,194,223 | 501   | Loss |
| DEL00001287 | chr1 | 10,218,382 | 10,218,748 | 366   | Loss |
| DEL00001288 | chr1 | 10,289,405 | 10,291,596 | 2,191 | Loss |
| DEL00001289 | chr1 | 10,292,663 | 10,292,717 | 54    | Loss |
| DEL00001290 | chr1 | 10,292,968 | 10,293,547 | 579   | Loss |
| DEL00001291 | chr1 | 10,295,492 | 10,295,877 | 385   | Loss |
| DEL00001292 | chr1 | 10,298,544 | 10,302,377 | 3,833 | Loss |
| DEL00001296 | chr1 | 10,315,330 | 10,315,395 | 65    | Loss |
| DEL00001298 | chr1 | 10,492,181 | 10,492,303 | 122   | Loss |
| DEL00001299 | chr1 | 10,561,567 | 10,561,679 | 112   | Loss |
| DEL00001301 | chr1 | 10,624,588 | 10,624,649 | 61    | Loss |
| DEL00001302 | chr1 | 10,652,058 | 10,652,123 | 65    | Loss |
| DEL00001307 | chr1 | 10,736,167 | 10,736,447 | 280   | Loss |
| DEL00001317 | chr1 | 11,016,733 | 11,016,794 | 61    | Loss |
| DEL00001323 | chr1 | 11,054,967 | 11,055,030 | 63    | Loss |

|             |      |            |            |       |      |
|-------------|------|------------|------------|-------|------|
| DEL00001332 | chr1 | 11,133,717 | 11,134,243 | 526   | Loss |
| DEL00001336 | chr1 | 11,264,460 | 11,264,545 | 85    | Loss |
| DEL00001338 | chr1 | 11,286,892 | 11,286,955 | 63    | Loss |
| DEL00001341 | chr1 | 11,333,247 | 11,334,203 | 956   | Loss |
| DEL00001344 | chr1 | 11,469,962 | 11,472,001 | 2,039 | Loss |
| DEL00001351 | chr1 | 11,521,252 | 11,521,687 | 435   | Loss |
| DEL00001353 | chr1 | 11,537,193 | 11,537,278 | 85    | Loss |
| DEL00001355 | chr1 | 11,549,895 | 11,550,424 | 529   | Loss |
| DEL00001359 | chr1 | 11,613,187 | 11,613,298 | 111   | Loss |
| DEL00001364 | chr1 | 11,733,132 | 11,733,198 | 66    | Loss |
| DEL00001365 | chr1 | 11,749,323 | 11,749,536 | 213   | Loss |
| DEL00001366 | chr1 | 11,751,850 | 11,751,931 | 81    | Loss |
| DEL00001371 | chr1 | 11,786,050 | 11,786,110 | 60    | Loss |
| DEL00001374 | chr1 | 11,791,771 | 11,791,987 | 216   | Loss |
| DEL00001375 | chr1 | 11,816,259 | 11,816,343 | 84    | Loss |
| DEL00001381 | chr1 | 11,897,091 | 11,897,365 | 274   | Loss |
| DEL00001384 | chr1 | 11,968,781 | 11,969,162 | 381   | Loss |
| DEL00001388 | chr1 | 12,057,971 | 12,058,039 | 68    | Loss |
| DEL00001394 | chr1 | 12,109,125 | 12,109,467 | 342   | Loss |
| DEL00001402 | chr1 | 12,230,178 | 12,230,961 | 783   | Loss |
| DEL00001404 | chr1 | 12,261,230 | 12,262,466 | 1,236 | Loss |
| DEL00001405 | chr1 | 12,286,142 | 12,286,763 | 621   | Loss |
| DEL00001407 | chr1 | 12,333,468 | 12,333,527 | 59    | Loss |
| DEL00001409 | chr1 | 12,334,828 | 12,335,088 | 260   | Loss |
| DEL00001410 | chr1 | 12,355,957 | 12,356,171 | 214   | Loss |
| DEL00001414 | chr1 | 12,507,207 | 12,507,763 | 556   | Loss |
| DEL00001416 | chr1 | 12,512,334 | 12,512,448 | 114   | Loss |
| DEL00001418 | chr1 | 12,530,582 | 12,531,166 | 584   | Loss |
| DEL00001425 | chr1 | 12,761,463 | 12,761,632 | 169   | Loss |
| DEL00001427 | chr1 | 12,783,436 | 12,783,547 | 111   | Loss |
| DEL00001428 | chr1 | 12,802,701 | 12,803,190 | 489   | Loss |
| DEL00001430 | chr1 | 12,814,702 | 12,814,786 | 84    | Loss |
| DEL00001440 | chr1 | 13,016,822 | 13,017,008 | 186   | Loss |
| DEL00001442 | chr1 | 13,095,546 | 13,095,650 | 104   | Loss |
| DEL00001445 | chr1 | 13,127,448 | 13,127,521 | 73    | Loss |
| DEL00001454 | chr1 | 13,189,491 | 13,189,641 | 150   | Loss |
| DEL00001485 | chr1 | 13,633,358 | 13,633,919 | 561   | Loss |
| DEL00001488 | chr1 | 13,706,975 | 13,707,099 | 124   | Loss |
| DUP00001493 | chr1 | 13,830,570 | 13,830,689 | 119   | Gain |
| DEL00001500 | chr1 | 13,889,936 | 13,890,132 | 196   | Loss |
| DEL00001501 | chr1 | 13,985,399 | 13,985,883 | 484   | Loss |
| DEL00001504 | chr1 | 14,049,995 | 14,050,053 | 58    | Loss |
| DUP00001509 | chr1 | 14,206,827 | 14,207,078 | 251   | Gain |
| DEL00001510 | chr1 | 14,224,516 | 14,224,571 | 55    | Loss |
| DEL00001518 | chr1 | 14,437,726 | 14,437,988 | 262   | Loss |
| DEL00001519 | chr1 | 14,455,043 | 14,455,146 | 103   | Loss |
| DEL00001526 | chr1 | 14,601,449 | 14,601,571 | 122   | Loss |
| DEL00001531 | chr1 | 14,649,784 | 14,650,509 | 725   | Loss |
| DEL00001534 | chr1 | 14,766,905 | 14,767,834 | 929   | Loss |



|             |      |            |            |        |      |
|-------------|------|------------|------------|--------|------|
| DEL00001536 | chr1 | 14,823,834 | 14,824,395 | 561    | Loss |
| DEL00001541 | chr1 | 14,942,716 | 14,942,850 | 134    | Loss |
| DUP00001543 | chr1 | 14,997,614 | 15,013,985 | 16,371 | Gain |
| DEL00001547 | chr1 | 15,109,658 | 15,109,844 | 186    | Loss |
| DEL00001551 | chr1 | 15,169,412 | 15,169,613 | 201    | Loss |
| DEL00001553 | chr1 | 15,174,117 | 15,174,487 | 370    | Loss |
| DEL00001557 | chr1 | 15,242,282 | 15,242,651 | 369    | Loss |
| DEL00001558 | chr1 | 15,255,521 | 15,255,682 | 161    | Loss |
| DEL00001559 | chr1 | 15,301,794 | 15,301,848 | 54     | Loss |
| DEL00001565 | chr1 | 15,354,263 | 15,354,400 | 137    | Loss |
| DEL00001567 | chr1 | 15,434,560 | 15,434,658 | 98     | Loss |
| DEL00001570 | chr1 | 15,490,476 | 15,491,210 | 734    | Loss |
| DEL00001576 | chr1 | 15,597,456 | 15,598,246 | 790    | Loss |
| DEL00001577 | chr1 | 15,609,387 | 15,609,443 | 56     | Loss |
| DEL00001579 | chr1 | 15,627,450 | 15,627,557 | 107    | Loss |
| DEL00001582 | chr1 | 15,743,221 | 15,747,238 | 4,017  | Loss |
| DEL00001589 | chr1 | 15,812,607 | 15,812,677 | 70     | Loss |
| DEL00001597 | chr1 | 15,970,728 | 15,970,816 | 88     | Loss |
| DEL00001606 | chr1 | 16,164,352 | 16,164,558 | 206    | Loss |
| DEL00001607 | chr1 | 16,178,434 | 16,178,949 | 515    | Loss |
| DEL00001611 | chr1 | 16,238,742 | 16,238,890 | 148    | Loss |
| DEL00001615 | chr1 | 16,336,102 | 16,336,823 | 721    | Loss |
| DEL00001618 | chr1 | 16,439,427 | 16,439,561 | 134    | Loss |
| DUP00001623 | chr1 | 16,636,333 | 16,636,419 | 86     | Gain |
| DEL00001625 | chr1 | 16,663,823 | 16,664,422 | 599    | Loss |
| DEL00001628 | chr1 | 16,703,608 | 16,703,931 | 323    | Loss |
| DEL00001629 | chr1 | 16,704,550 | 16,704,614 | 64     | Loss |
| DEL00001630 | chr1 | 16,827,962 | 16,829,440 | 1,478  | Loss |
| DEL00001631 | chr1 | 16,830,454 | 16,841,272 | 10,818 | Loss |
| DEL00001637 | chr1 | 16,865,198 | 16,867,033 | 1,835  | Loss |
| DEL00001640 | chr1 | 16,990,985 | 16,991,038 | 53     | Loss |
| DEL00001645 | chr1 | 17,087,603 | 17,087,798 | 195    | Loss |
| DEL00001646 | chr1 | 17,151,780 | 17,152,004 | 224    | Loss |
| DEL00001647 | chr1 | 17,159,017 | 17,163,317 | 4,300  | Loss |
| DEL00001648 | chr1 | 17,186,618 | 17,187,564 | 946    | Loss |
| DEL00001650 | chr1 | 17,203,070 | 17,205,276 | 2,206  | Loss |
| DEL00001651 | chr1 | 17,223,617 | 17,223,988 | 371    | Loss |
| DEL00001654 | chr1 | 17,335,051 | 17,335,161 | 110    | Loss |
| DEL00001658 | chr1 | 17,391,102 | 17,391,901 | 799    | Loss |
| DEL00001659 | chr1 | 17,431,038 | 17,431,420 | 382    | Loss |
| DEL00001660 | chr1 | 17,436,532 | 17,436,630 | 98     | Loss |
| DEL00001662 | chr1 | 17,460,897 | 17,461,132 | 235    | Loss |
| DEL00001663 | chr1 | 17,482,558 | 17,482,957 | 399    | Loss |
| DEL00001666 | chr1 | 17,565,703 | 17,566,593 | 890    | Loss |
| DEL00001669 | chr1 | 17,580,838 | 17,581,168 | 330    | Loss |
| DEL00001670 | chr1 | 17,589,402 | 17,589,543 | 141    | Loss |
| DUP00001673 | chr1 | 17,701,462 | 17,717,784 | 16,322 | Gain |
| DEL00001675 | chr1 | 17,741,242 | 17,741,324 | 82     | Loss |
| DEL00001680 | chr1 | 17,869,246 | 17,870,914 | 1,668  | Loss |

|             |      |            |            |        |      |
|-------------|------|------------|------------|--------|------|
| DEL00001682 | chr1 | 17,878,661 | 17,879,323 | 662    | Loss |
| DEL00001721 | chr1 | 17,995,477 | 17,995,927 | 450    | Loss |
| DEL00001723 | chr1 | 18,008,340 | 18,008,578 | 238    | Loss |
| DEL00001724 | chr1 | 18,042,916 | 18,043,284 | 368    | Loss |
| DEL00001730 | chr1 | 18,165,623 | 18,171,696 | 6,073  | Loss |
| DEL00001740 | chr1 | 18,377,379 | 18,378,284 | 905    | Loss |
| DEL00001746 | chr1 | 18,421,182 | 18,422,892 | 1,710  | Loss |
| DEL00001747 | chr1 | 18,457,419 | 18,458,082 | 663    | Loss |
| DEL00001752 | chr1 | 18,515,338 | 18,516,258 | 920    | Loss |
| DEL00001753 | chr1 | 18,525,904 | 18,526,143 | 239    | Loss |
| DEL00001757 | chr1 | 18,548,603 | 18,548,851 | 248    | Loss |
| DEL00001758 | chr1 | 18,597,409 | 18,599,108 | 1,699  | Loss |
| DEL00001759 | chr1 | 18,697,947 | 18,698,013 | 66     | Loss |
| DEL00001760 | chr1 | 18,721,954 | 18,722,384 | 430    | Loss |
| DEL00001761 | chr1 | 18,725,998 | 18,726,845 | 847    | Loss |
| DEL00001763 | chr1 | 18,739,666 | 18,740,842 | 1,176  | Loss |
| DEL00001767 | chr1 | 18,769,249 | 18,769,385 | 136    | Loss |
| DEL00001769 | chr1 | 18,790,862 | 18,791,326 | 464    | Loss |
| DEL00001770 | chr1 | 18,799,120 | 18,799,535 | 415    | Loss |
| DUP00001783 | chr1 | 19,025,298 | 19,025,442 | 144    | Gain |
| DEL00001786 | chr1 | 19,147,452 | 19,147,568 | 116    | Loss |
| DEL00001787 | chr1 | 19,209,811 | 19,210,056 | 245    | Loss |
| DEL00001788 | chr1 | 19,217,686 | 19,218,314 | 628    | Loss |
| DEL00001790 | chr1 | 19,241,928 | 19,241,994 | 66     | Loss |
| DEL00001796 | chr1 | 19,392,097 | 19,392,884 | 787    | Loss |
| DEL00001797 | chr1 | 19,417,083 | 19,417,554 | 471    | Loss |
| DEL00001799 | chr1 | 19,499,251 | 19,499,417 | 166    | Loss |
| DEL00001802 | chr1 | 19,514,647 | 19,515,151 | 504    | Loss |
| DUP00001809 | chr1 | 19,829,190 | 19,829,385 | 195    | Gain |
| DEL00001815 | chr1 | 19,872,382 | 19,873,465 | 1,083  | Loss |
| DEL00001816 | chr1 | 19,890,878 | 19,897,421 | 6,543  | Loss |
| DEL00001821 | chr1 | 20,038,138 | 20,039,014 | 876    | Loss |
| DEL00001823 | chr1 | 20,083,605 | 20,083,959 | 354    | Loss |
| DEL00001825 | chr1 | 20,099,445 | 20,099,533 | 88     | Loss |
| DEL00001827 | chr1 | 20,142,886 | 20,142,937 | 51     | Loss |
| DEL00001834 | chr1 | 20,386,961 | 20,387,729 | 768    | Loss |
| DEL00001835 | chr1 | 20,397,882 | 20,399,032 | 1,150  | Loss |
| DEL00001841 | chr1 | 20,454,154 | 20,454,483 | 329    | Loss |
| DEL00001842 | chr1 | 20,517,301 | 20,517,445 | 144    | Loss |
| DEL00001849 | chr1 | 20,543,292 | 20,545,995 | 2,703  | Loss |
| DEL00001852 | chr1 | 20,668,198 | 20,668,337 | 139    | Loss |
| DEL00001853 | chr1 | 20,747,008 | 20,747,777 | 769    | Loss |
| DUP00001855 | chr1 | 20,904,502 | 20,904,592 | 90     | Gain |
| DEL00001857 | chr1 | 20,929,294 | 20,929,411 | 117    | Loss |
| DEL00001860 | chr1 | 21,017,288 | 21,017,352 | 64     | Loss |
| DEL00001862 | chr1 | 21,027,912 | 21,028,144 | 232    | Loss |
| DEL00001866 | chr1 | 21,155,428 | 21,155,485 | 57     | Loss |
| DEL00001868 | chr1 | 21,184,937 | 21,185,122 | 185    | Loss |
| DUP00001870 | chr1 | 21,262,844 | 21,283,488 | 20,644 | Gain |

|             |      |            |            |       |      |
|-------------|------|------------|------------|-------|------|
| DUP00001872 | chr1 | 21,297,993 | 21,298,100 | 107   | Gain |
| DEL00001877 | chr1 | 21,488,966 | 21,489,607 | 641   | Loss |
| DEL00001878 | chr1 | 21,511,867 | 21,512,070 | 203   | Loss |
| DEL00001880 | chr1 | 21,514,895 | 21,519,223 | 4,328 | Loss |
| DEL00001881 | chr1 | 21,532,199 | 21,532,290 | 91    | Loss |
| DEL00001885 | chr1 | 21,559,689 | 21,559,916 | 227   | Loss |
| DEL00001886 | chr1 | 21,564,780 | 21,564,903 | 123   | Loss |
| DEL00001887 | chr1 | 21,581,145 | 21,581,891 | 746   | Loss |
| DEL00001888 | chr1 | 21,582,216 | 21,583,074 | 858   | Loss |
| DEL00001889 | chr1 | 21,590,176 | 21,591,304 | 1,128 | Loss |
| DEL00001895 | chr1 | 21,646,401 | 21,646,475 | 74    | Loss |
| DEL00001902 | chr1 | 21,689,995 | 21,690,211 | 216   | Loss |
| DEL00001909 | chr1 | 21,761,803 | 21,762,774 | 971   | Loss |
| DEL00001911 | chr1 | 21,779,395 | 21,780,023 | 628   | Loss |
| DEL00001919 | chr1 | 21,870,439 | 21,870,531 | 92    | Loss |
| DEL00001920 | chr1 | 21,880,449 | 21,880,552 | 103   | Loss |
| DEL00001925 | chr1 | 21,984,173 | 21,984,251 | 78    | Loss |
| DEL00001928 | chr1 | 22,002,497 | 22,002,591 | 94    | Loss |
| DEL00001929 | chr1 | 22,005,959 | 22,006,019 | 60    | Loss |
| DEL00001931 | chr1 | 22,101,848 | 22,102,314 | 466   | Loss |
| DEL00001935 | chr1 | 22,126,918 | 22,127,640 | 722   | Loss |
| DEL00001936 | chr1 | 22,192,636 | 22,193,027 | 391   | Loss |
| DEL00001937 | chr1 | 22,210,927 | 22,211,008 | 81    | Loss |
| DEL00001940 | chr1 | 22,328,280 | 22,328,508 | 228   | Loss |
| DEL00001941 | chr1 | 22,358,463 | 22,358,674 | 211   | Loss |
| DUP00001942 | chr1 | 22,383,986 | 22,384,188 | 202   | Gain |
| DEL00001944 | chr1 | 22,424,072 | 22,424,449 | 377   | Loss |
| DEL00001946 | chr1 | 22,425,621 | 22,426,253 | 632   | Loss |
| DUP00001948 | chr1 | 22,459,412 | 22,459,561 | 149   | Gain |
| DEL00001950 | chr1 | 22,486,770 | 22,487,647 | 877   | Loss |
| DEL00001952 | chr1 | 22,510,356 | 22,511,127 | 771   | Loss |
| DEL00001953 | chr1 | 22,515,478 | 22,516,079 | 601   | Loss |
| DEL00001955 | chr1 | 22,582,521 | 22,582,592 | 71    | Loss |
| DEL00001958 | chr1 | 22,618,357 | 22,618,456 | 99    | Loss |
| DEL00001959 | chr1 | 22,645,430 | 22,645,527 | 97    | Loss |
| DEL00001961 | chr1 | 22,699,896 | 22,700,079 | 183   | Loss |
| DEL00001962 | chr1 | 22,732,350 | 22,732,526 | 176   | Loss |
| DEL00001965 | chr1 | 22,803,823 | 22,804,008 | 185   | Loss |
| DEL00001967 | chr1 | 22,851,739 | 22,852,627 | 888   | Loss |
| DEL00001969 | chr1 | 22,855,410 | 22,855,464 | 54    | Loss |
| DEL00001971 | chr1 | 22,862,446 | 22,862,617 | 171   | Loss |
| DEL00001972 | chr1 | 22,870,984 | 22,871,954 | 970   | Loss |
| DEL00001976 | chr1 | 22,924,634 | 22,925,094 | 460   | Loss |
| DEL00001977 | chr1 | 22,973,055 | 22,973,107 | 52    | Loss |
| DEL00001978 | chr1 | 22,982,371 | 22,982,925 | 554   | Loss |
| DEL00001980 | chr1 | 23,030,762 | 23,031,168 | 406   | Loss |
| DEL00001983 | chr1 | 23,103,874 | 23,104,232 | 358   | Loss |
| DEL00001986 | chr1 | 23,211,251 | 23,212,507 | 1,256 | Loss |
| DEL00001987 | chr1 | 23,225,674 | 23,225,769 | 95    | Loss |

|             |      |            |            |        |      |
|-------------|------|------------|------------|--------|------|
| DEL00001991 | chr1 | 23,246,809 | 23,248,350 | 1,541  | Loss |
| DEL00001992 | chr1 | 23,261,031 | 23,261,573 | 542    | Loss |
| DEL00001996 | chr1 | 23,330,300 | 23,331,241 | 941    | Loss |
| DEL00001997 | chr1 | 23,337,360 | 23,337,420 | 60     | Loss |
| DEL00001998 | chr1 | 23,354,700 | 23,356,376 | 1,676  | Loss |
| DEL00001999 | chr1 | 23,360,473 | 23,360,684 | 211    | Loss |
| DEL00002003 | chr1 | 23,398,018 | 23,398,284 | 266    | Loss |
| DEL00002004 | chr1 | 23,422,902 | 23,423,487 | 585    | Loss |
| DEL00002006 | chr1 | 23,425,385 | 23,425,458 | 73     | Loss |
| DEL00002011 | chr1 | 23,460,595 | 23,460,665 | 70     | Loss |
| DEL00002014 | chr1 | 23,541,671 | 23,543,251 | 1,580  | Loss |
| DEL00002016 | chr1 | 23,561,544 | 23,561,639 | 95     | Loss |
| DEL00002019 | chr1 | 23,641,700 | 23,641,815 | 115    | Loss |
| DEL00002020 | chr1 | 23,647,674 | 23,647,728 | 54     | Loss |
| DEL00002021 | chr1 | 23,658,758 | 23,658,891 | 133    | Loss |
| DEL00002022 | chr1 | 23,664,180 | 23,664,305 | 125    | Loss |
| DEL00002024 | chr1 | 23,712,732 | 23,713,186 | 454    | Loss |
| DEL00002026 | chr1 | 23,849,400 | 23,849,490 | 90     | Loss |
| DEL00002028 | chr1 | 23,866,928 | 23,867,109 | 181    | Loss |
| DEL00002029 | chr1 | 23,870,083 | 23,870,239 | 156    | Loss |
| DEL00002031 | chr1 | 23,941,453 | 23,942,678 | 1,225  | Loss |
| DEL00002032 | chr1 | 23,969,899 | 23,971,121 | 1,222  | Loss |
| DEL00002033 | chr1 | 23,976,155 | 23,978,336 | 2,181  | Loss |
| DEL00002034 | chr1 | 23,982,571 | 23,982,658 | 87     | Loss |
| DUP00002035 | chr1 | 23,986,402 | 24,016,655 | 30,253 | Gain |
| DEL00002036 | chr1 | 24,048,025 | 24,048,440 | 415    | Loss |
| DEL00002038 | chr1 | 24,151,715 | 24,152,773 | 1,058  | Loss |
| DEL00002042 | chr1 | 24,163,324 | 24,163,398 | 74     | Loss |
| DUP00002045 | chr1 | 24,190,562 | 24,190,697 | 135    | Gain |
| DEL00002046 | chr1 | 24,192,573 | 24,192,644 | 71     | Loss |
| DEL00002049 | chr1 | 24,221,743 | 24,223,037 | 1,294  | Loss |
| DEL00002050 | chr1 | 24,223,966 | 24,224,040 | 74     | Loss |
| DEL00002053 | chr1 | 24,269,011 | 24,269,182 | 171    | Loss |
| DEL00002061 | chr1 | 24,567,371 | 24,567,573 | 202    | Loss |
| DEL00002067 | chr1 | 24,702,746 | 24,702,958 | 212    | Loss |
| DEL00002069 | chr1 | 24,742,021 | 24,742,140 | 119    | Loss |
| DEL00002070 | chr1 | 24,751,974 | 24,752,794 | 820    | Loss |
| DEL00002082 | chr1 | 25,035,604 | 25,035,723 | 119    | Loss |
| DEL00002083 | chr1 | 25,043,733 | 25,043,807 | 74     | Loss |
| DEL00002084 | chr1 | 25,061,505 | 25,061,566 | 61     | Loss |
| DEL00002087 | chr1 | 25,130,241 | 25,130,354 | 113    | Loss |
| DEL00002090 | chr1 | 25,165,738 | 25,165,883 | 145    | Loss |
| DEL00002091 | chr1 | 25,192,973 | 25,193,025 | 52     | Loss |
| DEL00002093 | chr1 | 25,306,231 | 25,306,871 | 640    | Loss |
| DEL00002094 | chr1 | 25,314,057 | 25,314,108 | 51     | Loss |
| DEL00002100 | chr1 | 25,493,123 | 25,493,243 | 120    | Loss |
| DEL00002105 | chr1 | 25,867,995 | 25,868,497 | 502    | Loss |
| DEL00002106 | chr1 | 25,957,888 | 25,958,131 | 243    | Loss |
| DEL00002110 | chr1 | 26,042,017 | 26,042,153 | 136    | Loss |

|             |      |            |            |       |      |
|-------------|------|------------|------------|-------|------|
| DEL00002112 | chr1 | 26,048,883 | 26,048,956 | 73    | Loss |
| DEL00002113 | chr1 | 26,059,535 | 26,059,692 | 157   | Loss |
| DEL00002114 | chr1 | 26,112,874 | 26,114,327 | 1,453 | Loss |
| DEL00002117 | chr1 | 26,186,939 | 26,187,004 | 65    | Loss |
| DEL00002119 | chr1 | 26,253,262 | 26,253,472 | 210   | Loss |
| DEL00002121 | chr1 | 26,260,388 | 26,260,554 | 166   | Loss |
| DEL00002123 | chr1 | 26,321,513 | 26,322,099 | 586   | Loss |
| DEL00002126 | chr1 | 26,429,127 | 26,429,295 | 168   | Loss |
| DEL00002132 | chr1 | 26,513,902 | 26,514,374 | 472   | Loss |
| DEL00002134 | chr1 | 26,660,527 | 26,660,936 | 409   | Loss |
| DEL00002136 | chr1 | 26,708,798 | 26,709,283 | 485   | Loss |
| DEL00002142 | chr1 | 26,850,219 | 26,850,324 | 105   | Loss |
| DEL00002143 | chr1 | 26,861,989 | 26,862,771 | 782   | Loss |
| DEL00002145 | chr1 | 26,941,261 | 26,941,357 | 96    | Loss |
| DEL00002146 | chr1 | 26,945,865 | 26,945,949 | 84    | Loss |
| DEL00002148 | chr1 | 27,026,043 | 27,026,140 | 97    | Loss |
| DEL00002151 | chr1 | 27,072,638 | 27,072,813 | 175   | Loss |
| DEL00002157 | chr1 | 27,087,052 | 27,087,266 | 214   | Loss |
| DEL00002161 | chr1 | 27,176,676 | 27,176,839 | 163   | Loss |
| DEL00002173 | chr1 | 27,470,697 | 27,471,068 | 371   | Loss |
| DEL00002185 | chr1 | 27,727,935 | 27,728,005 | 70    | Loss |
| DEL00002186 | chr1 | 27,734,161 | 27,734,236 | 75    | Loss |
| DEL00002191 | chr1 | 27,818,009 | 27,818,169 | 160   | Loss |
| DEL00002195 | chr1 | 27,937,309 | 27,937,528 | 219   | Loss |
| DEL00002197 | chr1 | 27,969,052 | 27,969,206 | 154   | Loss |
| DEL00002198 | chr1 | 27,983,063 | 27,983,187 | 124   | Loss |
| DEL00002201 | chr1 | 28,040,845 | 28,043,386 | 2,541 | Loss |
| DEL00002203 | chr1 | 28,044,664 | 28,045,402 | 738   | Loss |
| DEL00002205 | chr1 | 28,071,664 | 28,074,204 | 2,540 | Loss |
| DEL00002209 | chr1 | 28,171,497 | 28,171,585 | 88    | Loss |
| DEL00002212 | chr1 | 28,226,262 | 28,226,554 | 292   | Loss |
| DEL00002215 | chr1 | 28,281,544 | 28,281,622 | 78    | Loss |
| DEL00002216 | chr1 | 28,287,651 | 28,288,281 | 630   | Loss |
| DEL00002218 | chr1 | 28,313,072 | 28,313,986 | 914   | Loss |
| DEL00002219 | chr1 | 28,336,380 | 28,337,279 | 899   | Loss |
| DEL00002220 | chr1 | 28,340,604 | 28,340,716 | 112   | Loss |
| DEL00002221 | chr1 | 28,434,904 | 28,434,964 | 60    | Loss |
| DEL00002226 | chr1 | 28,520,654 | 28,520,772 | 118   | Loss |
| DEL00002229 | chr1 | 28,676,830 | 28,677,218 | 388   | Loss |
| DEL00002231 | chr1 | 28,925,454 | 28,925,534 | 80    | Loss |
| DEL00002237 | chr1 | 29,152,960 | 29,153,035 | 75    | Loss |
| DEL00002238 | chr1 | 29,161,833 | 29,162,248 | 415   | Loss |
| DEL00002239 | chr1 | 29,178,737 | 29,178,809 | 72    | Loss |
| DUP00002245 | chr1 | 29,292,102 | 29,292,398 | 296   | Gain |
| DEL00002246 | chr1 | 29,313,454 | 29,314,008 | 554   | Loss |
| DEL00002250 | chr1 | 29,452,054 | 29,452,138 | 84    | Loss |
| DEL00002251 | chr1 | 29,476,335 | 29,476,397 | 62    | Loss |
| DEL00002253 | chr1 | 29,543,374 | 29,544,127 | 753   | Loss |
| DEL00002254 | chr1 | 29,551,678 | 29,552,605 | 927   | Loss |

|             |      |            |            |        |       |
|-------------|------|------------|------------|--------|-------|
| DEL00002255 | chr1 | 29,579,022 | 29,579,081 | 59     | Loss  |
| DEL00002256 | chr1 | 29,678,175 | 29,678,646 | 471    | Loss  |
| DEL00002257 | chr1 | 29,692,288 | 29,692,783 | 495    | Loss  |
| DEL00002267 | chr1 | 30,044,329 | 30,044,913 | 584    | Loss  |
| DEL00002272 | chr1 | 30,117,106 | 30,117,803 | 697    | Loss  |
| DEL00002273 | chr1 | 30,163,523 | 30,163,747 | 224    | Loss  |
| DEL00002274 | chr1 | 30,177,094 | 30,177,153 | 59     | Loss  |
| DEL00002276 | chr1 | 30,212,737 | 30,212,866 | 129    | Loss  |
| DEL00002277 | chr1 | 30,271,423 | 30,271,603 | 180    | Loss  |
| DEL00002279 | chr1 | 30,371,047 | 30,371,104 | 57     | Loss  |
| DEL00002281 | chr1 | 30,433,811 | 30,433,978 | 167    | Loss  |
| DUP00002286 | chr1 | 30,564,442 | 30,564,524 | 82     | Gain  |
| DEL00002290 | chr1 | 30,665,835 | 30,665,952 | 117    | Loss  |
| DUP00002292 | chr1 | 30,677,983 | 30,690,100 | 12,117 | Gain  |
| DEL00002295 | chr1 | 30,730,332 | 30,730,400 | 68     | Loss  |
| DUP00002298 | chr1 | 30,812,168 | 30,812,252 | 84     | Gain  |
| DEL00002300 | chr1 | 30,850,449 | 30,852,001 | 1,552  | Loss  |
| DEL00002304 | chr1 | 30,887,678 | 30,888,117 | 439    | Loss  |
| DEL00002307 | chr1 | 30,917,941 | 30,918,002 | 61     | Loss  |
| DEL00002318 | chr1 | 31,350,761 | 31,350,830 | 69     | Loss  |
| DEL00002320 | chr1 | 31,441,583 | 31,441,764 | 181    | Loss  |
| DEL00002323 | chr1 | 31,504,318 | 31,506,401 | 2,083  | Loss  |
| DEL00002324 | chr1 | 31,513,947 | 31,514,040 | 93     | Loss  |
| DEL00002327 | chr1 | 31,608,246 | 31,608,388 | 142    | Loss  |
| DEL00002328 | chr1 | 31,609,844 | 31,609,964 | 120    | Loss  |
| DEL00002329 | chr1 | 31,619,613 | 31,619,682 | 69     | Loss  |
| DEL00002330 | chr1 | 31,623,293 | 31,623,647 | 354    | Loss  |
| DEL00002334 | chr1 | 31,688,077 | 31,688,220 | 143    | Loss  |
| DEL00002335 | chr1 | 31,690,737 | 31,691,384 | 647    | Loss  |
| DEL00002336 | chr1 | 31,731,587 | 31,731,641 | 54     | Loss  |
| DEL00002338 | chr1 | 31,783,369 | 31,785,780 | 2,411  | Loss  |
| DEL00002339 | chr1 | 31,814,497 | 31,818,809 | 4,312  | Loss  |
| DEL00002342 | chr1 | 31,870,415 | 31,870,545 | 130    | Loss  |
| DEL00002343 | chr1 | 31,875,034 | 31,875,143 | 109    | Loss  |
| DEL00002344 | chr1 | 31,894,806 | 31,895,544 | 738    | Loss  |
| DEL00002345 | chr1 | 31,973,755 | 31,973,919 | 164    | Loss  |
| DUP00002350 | chr1 | 32,116,695 | 32,135,841 | 19,146 | Mixed |
| DEL00002354 | chr1 | 32,149,760 | 32,155,586 | 5,826  | Loss  |
| DEL00002355 | chr1 | 32,161,191 | 32,161,406 | 215    | Loss  |
| DEL00002356 | chr1 | 32,165,218 | 32,165,320 | 102    | Loss  |
| DEL00002357 | chr1 | 32,168,380 | 32,168,981 | 601    | Loss  |
| DEL00002361 | chr1 | 32,262,019 | 32,262,874 | 855    | Loss  |
| DEL00002362 | chr1 | 32,283,293 | 32,283,736 | 443    | Loss  |
| DEL00002363 | chr1 | 32,307,530 | 32,307,679 | 149    | Loss  |
| DEL00002365 | chr1 | 32,401,819 | 32,402,600 | 781    | Loss  |
| DEL00002366 | chr1 | 32,407,416 | 32,407,741 | 325    | Loss  |
| DEL00002369 | chr1 | 32,456,145 | 32,456,711 | 566    | Loss  |
| DEL00002375 | chr1 | 32,498,029 | 32,499,177 | 1,148  | Loss  |
| DEL00002383 | chr1 | 32,615,758 | 32,615,831 | 73     | Loss  |

|             |      |            |            |        |      |
|-------------|------|------------|------------|--------|------|
| DEL00002384 | chr1 | 32,623,794 | 32,633,989 | 10,195 | Loss |
| DEL00002389 | chr1 | 32,663,265 | 32,664,563 | 1,298  | Loss |
| DEL00002399 | chr1 | 32,762,676 | 32,763,094 | 418    | Loss |
| DEL00002400 | chr1 | 32,814,750 | 32,820,584 | 5,834  | Loss |
| DEL00002407 | chr1 | 33,016,972 | 33,017,026 | 54     | Loss |
| DEL00002408 | chr1 | 33,018,847 | 33,018,914 | 67     | Loss |
| DEL00002412 | chr1 | 33,157,946 | 33,158,186 | 240    | Loss |
| DEL00002413 | chr1 | 33,164,709 | 33,164,893 | 184    | Loss |
| DEL00002422 | chr1 | 33,395,187 | 33,395,264 | 77     | Loss |
| DEL00002430 | chr1 | 33,600,972 | 33,601,111 | 139    | Loss |
| DEL00002435 | chr1 | 33,718,562 | 33,718,672 | 110    | Loss |
| DEL00002436 | chr1 | 33,721,440 | 33,722,103 | 663    | Loss |
| DEL00002439 | chr1 | 33,881,530 | 33,881,672 | 142    | Loss |
| DEL00002443 | chr1 | 33,980,749 | 33,981,135 | 386    | Loss |
| DEL00002455 | chr1 | 34,184,391 | 34,184,503 | 112    | Loss |
| DEL00002456 | chr1 | 34,283,467 | 34,284,261 | 794    | Loss |
| DEL00002457 | chr1 | 34,321,886 | 34,322,052 | 166    | Loss |
| DEL00002460 | chr1 | 34,354,992 | 34,355,124 | 132    | Loss |
| DEL00002468 | chr1 | 34,606,521 | 34,606,831 | 310    | Loss |
| DEL00002469 | chr1 | 34,619,558 | 34,619,661 | 103    | Loss |
| DEL00002471 | chr1 | 34,629,194 | 34,629,396 | 202    | Loss |
| DEL00002472 | chr1 | 34,644,434 | 34,644,501 | 67     | Loss |
| DEL00002474 | chr1 | 34,779,303 | 34,779,414 | 111    | Loss |
| DEL00002476 | chr1 | 34,874,391 | 34,874,478 | 87     | Loss |
| DEL00002478 | chr1 | 34,907,514 | 34,907,580 | 66     | Loss |
| DEL00002482 | chr1 | 34,933,451 | 34,935,332 | 1,881  | Loss |
| DEL00002484 | chr1 | 35,093,340 | 35,093,700 | 360    | Loss |
| DEL00002487 | chr1 | 35,134,647 | 35,140,832 | 6,185  | Loss |
| DEL00002489 | chr1 | 35,193,861 | 35,194,057 | 196    | Loss |
| DUP00002492 | chr1 | 35,309,593 | 35,309,845 | 252    | Gain |
| DEL00002494 | chr1 | 35,376,287 | 35,376,519 | 232    | Loss |
| DEL00002497 | chr1 | 35,435,618 | 35,435,685 | 67     | Loss |
| DEL00002503 | chr1 | 35,580,666 | 35,581,193 | 527    | Loss |
| DEL00002505 | chr1 | 35,588,209 | 35,589,000 | 791    | Loss |
| DEL00002506 | chr1 | 35,595,768 | 35,595,854 | 86     | Loss |
| DEL00002512 | chr1 | 35,770,778 | 35,771,342 | 564    | Loss |
| DEL00002516 | chr1 | 35,843,033 | 35,843,237 | 204    | Loss |
| DEL00002517 | chr1 | 35,854,222 | 35,854,407 | 185    | Loss |
| DEL00002520 | chr1 | 35,962,029 | 35,962,549 | 520    | Loss |
| DEL00002529 | chr1 | 36,082,570 | 36,082,675 | 105    | Loss |
| DEL00002537 | chr1 | 36,358,440 | 36,358,941 | 501    | Loss |
| DEL00002540 | chr1 | 36,394,757 | 36,394,867 | 110    | Loss |
| DEL00002545 | chr1 | 36,577,858 | 36,579,053 | 1,195  | Loss |
| DEL00002546 | chr1 | 36,584,355 | 36,584,461 | 106    | Loss |
| DEL00002547 | chr1 | 36,593,307 | 36,593,390 | 83     | Loss |
| DEL00002551 | chr1 | 36,630,719 | 36,630,771 | 52     | Loss |
| DEL00002552 | chr1 | 36,702,819 | 36,702,998 | 179    | Loss |
| DEL00002557 | chr1 | 36,741,489 | 36,741,979 | 490    | Loss |
| DEL00002564 | chr1 | 36,899,140 | 36,899,384 | 244    | Loss |

|             |      |            |            |       |      |
|-------------|------|------------|------------|-------|------|
| DEL00002565 | chr1 | 36,906,325 | 36,906,788 | 463   | Loss |
| DEL00002568 | chr1 | 37,008,915 | 37,008,987 | 72    | Loss |
| DEL00002569 | chr1 | 37,118,670 | 37,118,942 | 272   | Loss |
| DEL00002570 | chr1 | 37,170,713 | 37,171,552 | 839   | Loss |
| DEL00002572 | chr1 | 37,249,637 | 37,250,919 | 1,282 | Loss |
| DEL00002574 | chr1 | 37,301,244 | 37,302,589 | 1,345 | Loss |
| DEL00002577 | chr1 | 37,404,006 | 37,404,060 | 54    | Loss |
| DEL00002578 | chr1 | 37,446,792 | 37,446,867 | 75    | Loss |
| DEL00002579 | chr1 | 37,486,656 | 37,487,596 | 940   | Loss |
| DEL00002584 | chr1 | 37,603,726 | 37,604,079 | 353   | Loss |
| DEL00002587 | chr1 | 37,634,298 | 37,634,406 | 108   | Loss |
| DEL00002588 | chr1 | 37,648,844 | 37,649,001 | 157   | Loss |
| DEL00002602 | chr1 | 37,918,603 | 37,918,927 | 324   | Loss |
| DEL00002604 | chr1 | 37,935,645 | 37,935,857 | 212   | Loss |
| DEL00002607 | chr1 | 37,977,331 | 37,978,819 | 1,488 | Loss |
| DEL00002609 | chr1 | 37,992,956 | 37,993,049 | 93    | Loss |
| DEL00002610 | chr1 | 37,993,202 | 37,993,378 | 176   | Loss |
| DEL00002612 | chr1 | 38,074,317 | 38,074,737 | 420   | Loss |
| DEL00002613 | chr1 | 38,109,019 | 38,109,099 | 80    | Loss |
| DEL00002616 | chr1 | 38,131,825 | 38,132,132 | 307   | Loss |
| DEL00002622 | chr1 | 38,272,702 | 38,273,073 | 371   | Loss |
| DEL00002627 | chr1 | 38,354,883 | 38,355,632 | 749   | Loss |
| DEL00002628 | chr1 | 38,368,548 | 38,368,783 | 235   | Loss |
| DEL00002631 | chr1 | 38,395,443 | 38,396,218 | 775   | Loss |
| DEL00002632 | chr1 | 38,409,296 | 38,409,518 | 222   | Loss |
| DEL00002633 | chr1 | 38,418,422 | 38,418,538 | 116   | Loss |
| DEL00002636 | chr1 | 38,497,802 | 38,497,871 | 69    | Loss |
| DEL00002637 | chr1 | 38,531,595 | 38,531,748 | 153   | Loss |
| DEL00002641 | chr1 | 38,617,530 | 38,618,026 | 496   | Loss |
| DEL00002646 | chr1 | 38,758,650 | 38,758,714 | 64    | Loss |
| DEL00002648 | chr1 | 38,778,729 | 38,779,042 | 313   | Loss |
| DEL00002650 | chr1 | 38,803,032 | 38,803,846 | 814   | Loss |
| DEL00002653 | chr1 | 38,918,551 | 38,918,602 | 51    | Loss |
| DEL00002655 | chr1 | 38,937,709 | 38,938,051 | 342   | Loss |
| DEL00002656 | chr1 | 38,946,502 | 38,946,561 | 59    | Loss |
| DEL00002660 | chr1 | 38,987,046 | 38,987,371 | 325   | Loss |
| DEL00002661 | chr1 | 39,013,266 | 39,013,524 | 258   | Loss |
| DEL00002671 | chr1 | 39,567,993 | 39,568,104 | 111   | Loss |
| DEL00002674 | chr1 | 39,677,476 | 39,677,847 | 371   | Loss |
| DEL00002676 | chr1 | 39,683,827 | 39,684,771 | 944   | Loss |
| DEL00002678 | chr1 | 39,703,295 | 39,703,512 | 217   | Loss |
| DEL00002681 | chr1 | 39,821,559 | 39,821,674 | 115   | Loss |
| DEL00002682 | chr1 | 39,869,981 | 39,870,124 | 143   | Loss |
| DEL00002683 | chr1 | 39,904,399 | 39,904,453 | 54    | Loss |
| DEL00002684 | chr1 | 39,918,161 | 39,918,302 | 141   | Loss |
| DEL00002685 | chr1 | 39,923,147 | 39,923,533 | 386   | Loss |
| DEL00002686 | chr1 | 39,946,522 | 39,946,597 | 75    | Loss |
| DEL00002689 | chr1 | 39,980,749 | 39,980,966 | 217   | Loss |
| DEL00002690 | chr1 | 39,981,796 | 39,981,853 | 57    | Loss |



|             |      |            |            |       |      |
|-------------|------|------------|------------|-------|------|
| DEL00002692 | chr1 | 40,013,813 | 40,013,869 | 56    | Loss |
| DEL00002697 | chr1 | 40,098,677 | 40,100,402 | 1,725 | Loss |
| DUP00002700 | chr1 | 40,198,822 | 40,198,960 | 138   | Gain |
| DEL00002708 | chr1 | 40,332,500 | 40,333,025 | 525   | Loss |
| DEL00002712 | chr1 | 40,494,032 | 40,494,102 | 70    | Loss |
| DEL00002713 | chr1 | 40,499,688 | 40,499,775 | 87    | Loss |
| DEL00002715 | chr1 | 40,507,310 | 40,507,446 | 136   | Loss |
| DEL00002716 | chr1 | 40,508,245 | 40,508,868 | 623   | Loss |
| DEL00002722 | chr1 | 40,590,306 | 40,590,357 | 51    | Loss |
| DEL00002728 | chr1 | 40,726,108 | 40,726,837 | 729   | Loss |
| DEL00002729 | chr1 | 40,741,821 | 40,741,894 | 73    | Loss |
| DEL00002734 | chr1 | 40,809,187 | 40,809,474 | 287   | Loss |
| DEL00002735 | chr1 | 40,850,965 | 40,851,049 | 84    | Loss |
| DEL00002741 | chr1 | 41,103,603 | 41,104,112 | 509   | Loss |
| DEL00002743 | chr1 | 41,114,193 | 41,114,767 | 574   | Loss |
| DEL00002746 | chr1 | 41,222,775 | 41,224,248 | 1,473 | Loss |
| DEL00002747 | chr1 | 41,237,270 | 41,237,576 | 306   | Loss |
| DEL00002749 | chr1 | 41,297,980 | 41,298,971 | 991   | Loss |
| DEL00002756 | chr1 | 41,419,208 | 41,422,093 | 2,885 | Loss |
| DEL00002759 | chr1 | 41,457,237 | 41,457,851 | 614   | Loss |
| DEL00002762 | chr1 | 41,549,646 | 41,549,715 | 69    | Loss |
| DEL00002763 | chr1 | 41,563,526 | 41,563,643 | 117   | Loss |
| DEL00002764 | chr1 | 41,573,974 | 41,574,278 | 304   | Loss |
| DEL00002766 | chr1 | 41,592,680 | 41,592,888 | 208   | Loss |
| DEL00002768 | chr1 | 41,655,057 | 41,655,273 | 216   | Loss |
| DEL00002771 | chr1 | 41,895,161 | 41,896,082 | 921   | Loss |
| DEL00002772 | chr1 | 41,954,701 | 41,955,132 | 431   | Loss |
| DEL00002782 | chr1 | 42,249,613 | 42,249,794 | 181   | Loss |
| DEL00002783 | chr1 | 42,263,486 | 42,263,623 | 137   | Loss |
| DEL00002784 | chr1 | 42,332,671 | 42,332,735 | 64    | Loss |
| DEL00002785 | chr1 | 42,374,712 | 42,374,807 | 95    | Loss |
| DEL00002786 | chr1 | 42,375,881 | 42,382,339 | 6,458 | Loss |
| DEL00002787 | chr1 | 42,396,065 | 42,396,276 | 211   | Loss |
| DEL00002788 | chr1 | 42,424,631 | 42,425,520 | 889   | Loss |
| DUP00002789 | chr1 | 42,429,999 | 42,430,073 | 74    | Gain |
| DEL00002791 | chr1 | 42,558,143 | 42,558,203 | 60    | Loss |
| DEL00002792 | chr1 | 42,653,766 | 42,653,922 | 156   | Loss |
| DEL00002795 | chr1 | 42,812,785 | 42,813,451 | 666   | Loss |
| DEL00002796 | chr1 | 42,824,184 | 42,824,250 | 66    | Loss |
| DEL00002801 | chr1 | 42,975,574 | 42,975,698 | 124   | Loss |
| DEL00002802 | chr1 | 42,976,928 | 42,977,000 | 72    | Loss |
| DEL00002804 | chr1 | 43,093,508 | 43,093,563 | 55    | Loss |
| DEL00002806 | chr1 | 43,210,766 | 43,211,644 | 878   | Loss |
| DEL00002813 | chr1 | 43,575,944 | 43,576,149 | 205   | Loss |
| DEL00002814 | chr1 | 43,583,016 | 43,583,257 | 241   | Loss |
| DEL00002821 | chr1 | 43,844,438 | 43,844,501 | 63    | Loss |
| DEL00002825 | chr1 | 43,866,766 | 43,866,845 | 79    | Loss |
| DEL00002826 | chr1 | 43,920,387 | 43,925,486 | 5,099 | Loss |
| DEL00002828 | chr1 | 43,943,461 | 43,943,528 | 67    | Loss |

|             |      |            |            |        |       |
|-------------|------|------------|------------|--------|-------|
| DEL00002831 | chr1 | 44,042,789 | 44,042,976 | 187    | Loss  |
| DEL00002836 | chr1 | 44,182,830 | 44,183,019 | 189    | Loss  |
| DEL00002841 | chr1 | 44,244,849 | 44,245,197 | 348    | Loss  |
| DEL00002843 | chr1 | 44,256,539 | 44,256,827 | 288    | Loss  |
| DEL00002849 | chr1 | 44,390,837 | 44,390,896 | 59     | Loss  |
| DEL00002853 | chr1 | 44,581,402 | 44,581,603 | 201    | Loss  |
| DEL00002860 | chr1 | 44,653,983 | 44,654,087 | 104    | Loss  |
| DEL00002867 | chr1 | 44,815,329 | 44,815,398 | 69     | Loss  |
| DEL00002871 | chr1 | 44,914,978 | 44,915,085 | 107    | Loss  |
| DUP00002878 | chr1 | 45,172,495 | 45,185,841 | 13,346 | Gain  |
| DEL00002880 | chr1 | 45,270,370 | 45,270,465 | 95     | Loss  |
| DEL00002885 | chr1 | 45,407,572 | 45,407,760 | 188    | Loss  |
| DEL00002887 | chr1 | 45,419,974 | 45,420,143 | 169    | Loss  |
| DEL00002892 | chr1 | 45,482,506 | 45,484,768 | 2,262  | Loss  |
| DEL00002894 | chr1 | 45,500,217 | 45,500,292 | 75     | Loss  |
| DEL00002897 | chr1 | 45,541,215 | 45,541,957 | 742    | Loss  |
| DEL00002900 | chr1 | 45,570,707 | 45,570,970 | 263    | Loss  |
| DEL00002902 | chr1 | 45,634,522 | 45,634,676 | 154    | Loss  |
| DEL00002905 | chr1 | 45,672,289 | 45,672,599 | 310    | Loss  |
| DUP00002908 | chr1 | 45,696,580 | 45,696,931 | 351    | Gain  |
| DEL00002911 | chr1 | 45,730,737 | 45,731,346 | 609    | Loss  |
| DEL00002923 | chr1 | 45,863,437 | 45,863,568 | 131    | Loss  |
| DEL00002930 | chr1 | 46,010,905 | 46,011,136 | 231    | Loss  |
| DEL00002940 | chr1 | 46,158,577 | 46,158,761 | 184    | Loss  |
| DEL00002941 | chr1 | 46,161,614 | 46,162,105 | 491    | Loss  |
| DEL00002949 | chr1 | 46,241,653 | 46,242,017 | 364    | Loss  |
| DEL00002954 | chr1 | 46,262,205 | 46,262,436 | 231    | Loss  |
| DUP00002956 | chr1 | 46,306,985 | 46,337,503 | 30,518 | Mixed |
| DEL00002968 | chr1 | 46,468,697 | 46,468,782 | 85     | Loss  |
| DEL00002973 | chr1 | 46,576,114 | 46,576,500 | 386    | Loss  |
| DEL00002978 | chr1 | 46,853,570 | 46,853,711 | 141    | Loss  |
| DEL00002979 | chr1 | 46,864,901 | 46,864,991 | 90     | Loss  |
| DEL00002982 | chr1 | 46,874,981 | 46,875,218 | 237    | Loss  |
| DEL00002985 | chr1 | 46,986,793 | 46,986,972 | 179    | Loss  |
| DEL00002986 | chr1 | 46,993,245 | 46,993,373 | 128    | Loss  |
| DEL00002992 | chr1 | 47,154,862 | 47,156,305 | 1,443  | Loss  |
| DEL00002998 | chr1 | 47,234,931 | 47,235,838 | 907    | Loss  |
| DEL00003001 | chr1 | 47,303,379 | 47,303,470 | 91     | Loss  |
| DEL00003005 | chr1 | 47,398,269 | 47,398,411 | 142    | Loss  |
| DEL00003009 | chr1 | 47,430,132 | 47,430,680 | 548    | Loss  |
| DEL00003011 | chr1 | 47,447,225 | 47,447,289 | 64     | Loss  |
| DEL00003012 | chr1 | 47,488,888 | 47,489,019 | 131    | Loss  |
| DEL00003015 | chr1 | 47,578,411 | 47,579,054 | 643    | Loss  |
| DEL00003017 | chr1 | 47,704,762 | 47,705,002 | 240    | Loss  |
| DEL00003018 | chr1 | 47,709,444 | 47,710,034 | 590    | Loss  |
| DEL00003026 | chr1 | 47,774,172 | 47,774,280 | 108    | Loss  |
| DEL00003027 | chr1 | 47,792,252 | 47,792,937 | 685    | Loss  |
| DEL00003036 | chr1 | 47,963,829 | 47,963,916 | 87     | Loss  |
| DEL00003039 | chr1 | 47,991,956 | 47,992,240 | 284    | Loss  |

|             |      |            |            |        |      |
|-------------|------|------------|------------|--------|------|
| DEL00003040 | chr1 | 48,003,786 | 48,004,348 | 562    | Loss |
| DEL00003045 | chr1 | 48,087,338 | 48,087,588 | 250    | Loss |
| DEL00003046 | chr1 | 48,095,507 | 48,095,608 | 101    | Loss |
| DEL00003050 | chr1 | 48,166,646 | 48,166,701 | 55     | Loss |
| DEL00003053 | chr1 | 48,192,516 | 48,192,571 | 55     | Loss |
| DEL00003070 | chr1 | 48,513,451 | 48,513,682 | 231    | Loss |
| DEL00003074 | chr1 | 48,563,488 | 48,563,549 | 61     | Loss |
| DEL00003076 | chr1 | 48,581,909 | 48,582,119 | 210    | Loss |
| DEL00003087 | chr1 | 48,890,752 | 48,890,829 | 77     | Loss |
| DEL00003088 | chr1 | 48,897,181 | 48,897,497 | 316    | Loss |
| DEL00003089 | chr1 | 48,898,155 | 48,898,911 | 756    | Loss |
| DEL00003092 | chr1 | 48,915,306 | 48,915,400 | 94     | Loss |
| DEL00003093 | chr1 | 48,917,543 | 48,917,970 | 427    | Loss |
| DEL00003095 | chr1 | 48,927,264 | 48,927,770 | 506    | Loss |
| DEL00003097 | chr1 | 48,941,052 | 48,941,186 | 134    | Loss |
| DEL00003099 | chr1 | 48,963,878 | 48,964,155 | 277    | Loss |
| DEL00003101 | chr1 | 48,967,513 | 48,967,762 | 249    | Loss |
| DEL00003104 | chr1 | 48,979,299 | 48,980,600 | 1,301  | Loss |
| DEL00003106 | chr1 | 49,003,897 | 49,004,124 | 227    | Loss |
| DEL00003114 | chr1 | 49,163,890 | 49,163,995 | 105    | Loss |
| DEL00003115 | chr1 | 49,197,018 | 49,197,508 | 490    | Loss |
| DEL00003118 | chr1 | 49,207,102 | 49,207,439 | 337    | Loss |
| DEL00003123 | chr1 | 49,234,684 | 49,234,743 | 59     | Loss |
| DEL00003125 | chr1 | 49,246,010 | 49,247,822 | 1,812  | Loss |
| DEL00003141 | chr1 | 49,559,054 | 49,559,788 | 734    | Loss |
| DEL00003149 | chr1 | 49,726,159 | 49,726,264 | 105    | Loss |
| DEL00003154 | chr1 | 49,831,473 | 49,832,218 | 745    | Loss |
| DEL00003156 | chr1 | 49,964,541 | 49,965,064 | 523    | Loss |
| DEL00003157 | chr1 | 50,054,894 | 50,054,951 | 57     | Loss |
| DEL00003162 | chr1 | 50,202,059 | 50,202,599 | 540    | Loss |
| DEL00003165 | chr1 | 50,300,065 | 50,300,288 | 223    | Loss |
| DEL00003172 | chr1 | 50,500,576 | 50,500,630 | 54     | Loss |
| DEL00003183 | chr1 | 50,696,733 | 50,697,160 | 427    | Loss |
| DEL00003211 | chr1 | 51,036,879 | 51,036,954 | 75     | Loss |
| DEL00003214 | chr1 | 51,192,079 | 51,192,172 | 93     | Loss |
| DEL00003218 | chr1 | 51,228,131 | 51,228,392 | 261    | Loss |
| DEL00003225 | chr1 | 51,467,367 | 51,467,507 | 140    | Loss |
| DEL00003226 | chr1 | 51,605,095 | 51,605,165 | 70     | Loss |
| DEL00003230 | chr1 | 51,688,603 | 51,688,941 | 338    | Loss |
| DEL00003233 | chr1 | 51,697,112 | 51,699,401 | 2,289  | Loss |
| DEL00003243 | chr1 | 51,890,034 | 51,890,234 | 200    | Loss |
| DEL00003266 | chr1 | 52,552,866 | 52,552,926 | 60     | Loss |
| DEL00003267 | chr1 | 52,565,987 | 52,566,580 | 593    | Loss |
| DEL00003272 | chr1 | 52,678,102 | 52,678,386 | 284    | Loss |
| DUP00003273 | chr1 | 52,682,037 | 52,692,527 | 10,490 | Gain |
| DEL00003277 | chr1 | 52,838,343 | 52,838,888 | 545    | Loss |
| DEL00003280 | chr1 | 52,840,614 | 52,841,214 | 600    | Loss |
| DEL00003282 | chr1 | 52,847,569 | 52,847,629 | 60     | Loss |
| DEL00003285 | chr1 | 52,942,351 | 52,946,984 | 4,633  | Loss |

|             |      |            |            |       |      |
|-------------|------|------------|------------|-------|------|
| DEL00003287 | chr1 | 52,951,444 | 52,951,964 | 520   | Loss |
| DEL00003292 | chr1 | 53,039,719 | 53,039,783 | 64    | Loss |
| DEL00003296 | chr1 | 53,102,482 | 53,102,557 | 75    | Loss |
| DEL00003297 | chr1 | 53,157,449 | 53,157,930 | 481   | Loss |
| DEL00003300 | chr1 | 53,181,020 | 53,181,342 | 322   | Loss |
| DEL00003303 | chr1 | 53,307,440 | 53,307,690 | 250   | Loss |
| DEL00003306 | chr1 | 53,415,720 | 53,416,508 | 788   | Loss |
| DEL00003307 | chr1 | 53,439,105 | 53,439,193 | 88    | Loss |
| DEL00003311 | chr1 | 53,466,090 | 53,466,160 | 70    | Loss |
| DEL00003314 | chr1 | 53,505,678 | 53,505,730 | 52    | Loss |
| DEL00003316 | chr1 | 53,562,341 | 53,562,426 | 85    | Loss |
| DEL00003323 | chr1 | 53,761,223 | 53,761,476 | 253   | Loss |
| DEL00003324 | chr1 | 53,765,919 | 53,765,992 | 73    | Loss |
| DEL00003328 | chr1 | 53,809,839 | 53,809,919 | 80    | Loss |
| DEL00003330 | chr1 | 53,822,265 | 53,822,474 | 209   | Loss |
| DEL00003332 | chr1 | 53,842,484 | 53,843,269 | 785   | Loss |
| DEL00003335 | chr1 | 53,923,436 | 53,924,596 | 1,160 | Loss |
| DEL00003338 | chr1 | 53,976,498 | 53,976,553 | 55    | Loss |
| DEL00003344 | chr1 | 54,049,273 | 54,049,549 | 276   | Loss |
| DEL00003348 | chr1 | 54,062,587 | 54,062,641 | 54    | Loss |
| DEL00003362 | chr1 | 54,350,777 | 54,350,888 | 111   | Loss |
| DEL00003364 | chr1 | 54,362,432 | 54,362,938 | 506   | Loss |
| DEL00003382 | chr1 | 54,478,018 | 54,478,267 | 249   | Loss |
| DEL00003384 | chr1 | 54,496,491 | 54,496,753 | 262   | Loss |
| DEL00003387 | chr1 | 54,573,377 | 54,573,568 | 191   | Loss |
| DEL00003390 | chr1 | 54,644,183 | 54,644,272 | 89    | Loss |
| DEL00003391 | chr1 | 54,653,134 | 54,653,189 | 55    | Loss |
| DEL00003395 | chr1 | 54,821,415 | 54,821,486 | 71    | Loss |
| DEL00003398 | chr1 | 54,863,891 | 54,863,970 | 79    | Loss |
| DEL00003401 | chr1 | 54,891,724 | 54,893,774 | 2,050 | Loss |
| DEL00003409 | chr1 | 54,923,802 | 54,923,886 | 84    | Loss |
| DEL00003411 | chr1 | 54,985,589 | 54,985,809 | 220   | Loss |
| DEL00003417 | chr1 | 55,150,990 | 55,151,258 | 268   | Loss |
| DEL00003419 | chr1 | 55,249,810 | 55,249,888 | 78    | Loss |
| DUP00003422 | chr1 | 55,329,717 | 55,329,905 | 188   | Gain |
| DEL00003423 | chr1 | 55,361,527 | 55,361,884 | 357   | Loss |
| DEL00003438 | chr1 | 55,716,895 | 55,716,947 | 52    | Loss |
| DEL00003447 | chr1 | 55,899,633 | 55,899,689 | 56    | Loss |
| DEL00003448 | chr1 | 55,900,648 | 55,900,717 | 69    | Loss |
| DEL00003454 | chr1 | 56,096,434 | 56,096,602 | 168   | Loss |
| DEL00003456 | chr1 | 56,148,168 | 56,148,469 | 301   | Loss |
| DEL00003461 | chr1 | 56,379,215 | 56,379,638 | 423   | Loss |
| DEL00003463 | chr1 | 56,401,925 | 56,401,991 | 66    | Loss |
| DEL00003465 | chr1 | 56,453,486 | 56,453,564 | 78    | Loss |
| DEL00003466 | chr1 | 56,466,002 | 56,466,250 | 248   | Loss |
| DEL00003467 | chr1 | 56,473,354 | 56,473,436 | 82    | Loss |
| DEL00003473 | chr1 | 56,637,360 | 56,637,476 | 116   | Loss |
| DEL00003475 | chr1 | 56,658,843 | 56,659,089 | 246   | Loss |
| DEL00003477 | chr1 | 56,667,807 | 56,668,139 | 332   | Loss |

|             |      |            |            |        |       |
|-------------|------|------------|------------|--------|-------|
| DEL00003481 | chr1 | 56,786,914 | 56,787,071 | 157    | Loss  |
| DEL00003484 | chr1 | 56,859,640 | 56,859,715 | 75     | Loss  |
| DEL00003485 | chr1 | 56,865,335 | 56,865,399 | 64     | Loss  |
| DEL00003487 | chr1 | 56,954,922 | 56,957,884 | 2,962  | Loss  |
| DEL00003494 | chr1 | 57,044,056 | 57,044,152 | 96     | Loss  |
| DUP00003498 | chr1 | 57,060,124 | 57,060,210 | 86     | Gain  |
| DEL00003499 | chr1 | 57,061,779 | 57,061,842 | 63     | Loss  |
| DEL00003502 | chr1 | 57,097,996 | 57,098,074 | 78     | Loss  |
| DEL00003503 | chr1 | 57,105,615 | 57,105,847 | 232    | Loss  |
| DEL00003524 | chr1 | 57,563,938 | 57,564,013 | 75     | Loss  |
| DEL00003527 | chr1 | 57,889,717 | 57,890,743 | 1,026  | Loss  |
| DEL00003534 | chr1 | 57,947,981 | 57,948,712 | 731    | Loss  |
| DUP00003536 | chr1 | 57,981,231 | 58,001,511 | 20,280 | Mixed |
| DEL00003541 | chr1 | 58,068,036 | 58,068,103 | 67     | Loss  |
| DEL00003543 | chr1 | 58,130,814 | 58,132,885 | 2,071  | Loss  |
| DEL00003551 | chr1 | 58,339,330 | 58,339,405 | 75     | Loss  |
| DEL00003552 | chr1 | 58,353,472 | 58,354,008 | 536    | Loss  |
| DEL00003555 | chr1 | 58,429,313 | 58,429,636 | 323    | Loss  |
| DEL00003558 | chr1 | 58,478,196 | 58,478,252 | 56     | Loss  |
| DEL00003561 | chr1 | 58,562,604 | 58,563,084 | 480    | Loss  |
| DEL00003565 | chr1 | 58,645,969 | 58,648,036 | 2,067  | Loss  |
| DEL00003566 | chr1 | 58,672,363 | 58,673,319 | 956    | Loss  |
| DEL00003567 | chr1 | 58,736,204 | 58,741,778 | 5,574  | Loss  |
| DEL00003568 | chr1 | 58,742,460 | 58,742,677 | 217    | Loss  |
| DEL00003569 | chr1 | 58,759,976 | 58,760,028 | 52     | Loss  |
| DEL00003570 | chr1 | 58,766,105 | 58,766,587 | 482    | Loss  |
| DEL00003571 | chr1 | 58,817,953 | 58,818,126 | 173    | Loss  |
| DEL00003572 | chr1 | 58,842,831 | 58,842,882 | 51     | Loss  |
| DEL00003577 | chr1 | 58,960,974 | 58,961,058 | 84     | Loss  |
| DEL00003578 | chr1 | 58,995,532 | 58,995,596 | 64     | Loss  |
| DEL00003580 | chr1 | 59,009,332 | 59,009,451 | 119    | Loss  |
| DEL00003583 | chr1 | 59,079,557 | 59,079,853 | 296    | Loss  |
| DEL00003584 | chr1 | 59,104,109 | 59,104,274 | 165    | Loss  |
| DEL00003587 | chr1 | 59,140,518 | 59,140,634 | 116    | Loss  |
| DEL00003588 | chr1 | 59,143,998 | 59,144,981 | 983    | Loss  |
| DEL00003592 | chr1 | 59,199,866 | 59,199,950 | 84     | Loss  |
| DEL00003602 | chr1 | 59,473,422 | 59,473,991 | 569    | Loss  |
| DEL00003606 | chr1 | 59,562,201 | 59,562,318 | 117    | Loss  |
| DEL00003609 | chr1 | 59,618,687 | 59,620,299 | 1,612  | Loss  |
| DEL00003611 | chr1 | 59,630,807 | 59,630,860 | 53     | Loss  |
| DEL00003612 | chr1 | 59,678,162 | 59,678,245 | 83     | Loss  |
| DEL00003614 | chr1 | 59,723,089 | 59,723,400 | 311    | Loss  |
| DEL00003623 | chr1 | 59,944,595 | 59,944,804 | 209    | Loss  |
| DEL00003624 | chr1 | 59,950,192 | 59,950,389 | 197    | Loss  |
| DEL00003627 | chr1 | 59,975,346 | 59,975,411 | 65     | Loss  |
| DEL00003628 | chr1 | 59,975,480 | 59,976,767 | 1,287  | Loss  |
| DEL00003629 | chr1 | 59,982,398 | 59,983,012 | 614    | Loss  |
| DEL00003631 | chr1 | 60,034,504 | 60,034,613 | 109    | Loss  |
| DEL00003634 | chr1 | 60,077,463 | 60,078,234 | 771    | Loss  |

|             |      |            |            |        |       |
|-------------|------|------------|------------|--------|-------|
| DEL00003641 | chr1 | 60,308,095 | 60,308,148 | 53     | Loss  |
| DEL00003644 | chr1 | 60,326,459 | 60,326,524 | 65     | Loss  |
| DEL00003646 | chr1 | 60,360,572 | 60,360,644 | 72     | Loss  |
| DEL00003647 | chr1 | 60,391,546 | 60,391,606 | 60     | Loss  |
| DEL00003648 | chr1 | 60,408,386 | 60,408,634 | 248    | Loss  |
| DEL00003649 | chr1 | 60,475,723 | 60,475,783 | 60     | Loss  |
| DEL00003650 | chr1 | 60,491,239 | 60,491,530 | 291    | Loss  |
| DEL00003655 | chr1 | 60,752,123 | 60,752,890 | 767    | Loss  |
| DEL00003656 | chr1 | 60,823,527 | 60,824,447 | 920    | Loss  |
| DEL00003658 | chr1 | 60,876,169 | 60,876,246 | 77     | Loss  |
| DEL00003660 | chr1 | 60,984,960 | 60,985,216 | 256    | Loss  |
| DEL00003664 | chr1 | 61,393,983 | 61,394,034 | 51     | Loss  |
| DEL00003666 | chr1 | 61,509,632 | 61,509,695 | 63     | Loss  |
| DEL00003670 | chr1 | 61,610,288 | 61,610,348 | 60     | Loss  |
| DEL00003671 | chr1 | 61,689,864 | 61,689,935 | 71     | Loss  |
| DEL00003672 | chr1 | 61,693,485 | 61,693,550 | 65     | Loss  |
| DEL00003678 | chr1 | 61,881,331 | 61,881,476 | 145    | Loss  |
| DEL00003680 | chr1 | 61,911,224 | 61,911,561 | 337    | Loss  |
| DEL00003683 | chr1 | 61,961,979 | 61,963,158 | 1,179  | Loss  |
| DUP00003697 | chr1 | 62,308,461 | 62,333,164 | 24,703 | Mixed |
| DEL00003713 | chr1 | 62,357,610 | 62,357,693 | 83     | Loss  |
| DEL00003715 | chr1 | 62,399,292 | 62,399,349 | 57     | Loss  |
| DEL00003718 | chr1 | 62,407,013 | 62,407,396 | 383    | Loss  |
| DEL00003721 | chr1 | 62,595,909 | 62,596,086 | 177    | Loss  |
| DEL00003722 | chr1 | 62,635,098 | 62,635,772 | 674    | Loss  |
| DEL00003729 | chr1 | 62,693,818 | 62,693,875 | 57     | Loss  |
| DEL00003731 | chr1 | 62,766,426 | 62,766,789 | 363    | Loss  |
| DEL00003733 | chr1 | 62,804,037 | 62,804,099 | 62     | Loss  |
| DEL00003735 | chr1 | 62,962,406 | 62,962,488 | 82     | Loss  |
| DEL00003736 | chr1 | 62,980,592 | 62,981,412 | 820    | Loss  |
| DEL00003743 | chr1 | 63,361,071 | 63,361,629 | 558    | Loss  |
| DEL00003745 | chr1 | 63,407,537 | 63,407,605 | 68     | Loss  |
| DEL00003746 | chr1 | 63,495,660 | 63,495,948 | 288    | Loss  |
| DEL00003747 | chr1 | 63,554,537 | 63,554,681 | 144    | Loss  |
| DEL00003752 | chr1 | 63,886,984 | 63,887,090 | 106    | Loss  |
| DEL00003753 | chr1 | 63,896,947 | 63,897,522 | 575    | Loss  |
| DEL00003758 | chr1 | 64,174,145 | 64,174,531 | 386    | Loss  |
| DEL00003759 | chr1 | 64,195,536 | 64,195,999 | 463    | Loss  |
| DEL00003763 | chr1 | 64,353,609 | 64,353,699 | 90     | Loss  |
| DEL00003764 | chr1 | 64,385,548 | 64,385,708 | 160    | Loss  |
| DEL00003770 | chr1 | 64,585,313 | 64,585,383 | 70     | Loss  |
| DEL00003771 | chr1 | 64,585,714 | 64,585,806 | 92     | Loss  |
| DEL00003774 | chr1 | 64,697,296 | 64,697,412 | 116    | Loss  |
| DEL00003778 | chr1 | 64,973,089 | 64,974,999 | 1,910  | Loss  |
| DEL00003779 | chr1 | 64,991,860 | 64,992,991 | 1,131  | Loss  |
| DEL00003783 | chr1 | 65,318,201 | 65,322,405 | 4,204  | Loss  |
| DEL00003794 | chr1 | 65,456,253 | 65,457,370 | 1,117  | Loss  |
| DEL00003795 | chr1 | 65,471,695 | 65,472,126 | 431    | Loss  |
| DEL00003797 | chr1 | 65,493,798 | 65,493,895 | 97     | Loss  |

|             |      |            |            |        |      |
|-------------|------|------------|------------|--------|------|
| DUP00003800 | chr1 | 65,554,131 | 65,554,291 | 160    | Gain |
| DEL00003822 | chr1 | 65,901,852 | 65,902,310 | 458    | Loss |
| DEL00003829 | chr1 | 66,122,282 | 66,122,367 | 85     | Loss |
| DEL00003830 | chr1 | 66,125,570 | 66,125,725 | 155    | Loss |
| DEL00003831 | chr1 | 66,145,485 | 66,146,941 | 1,456  | Loss |
| DEL00003832 | chr1 | 66,170,902 | 66,170,979 | 77     | Loss |
| DEL00003835 | chr1 | 66,192,979 | 66,193,646 | 667    | Loss |
| DEL00003848 | chr1 | 66,744,610 | 66,744,667 | 57     | Loss |
| DEL00003850 | chr1 | 66,756,255 | 66,756,355 | 100    | Loss |
| DEL00003858 | chr1 | 66,900,426 | 66,902,283 | 1,857  | Loss |
| DEL00003866 | chr1 | 67,077,709 | 67,078,149 | 440    | Loss |
| DEL00003867 | chr1 | 67,102,265 | 67,102,768 | 503    | Loss |
| DEL00003870 | chr1 | 67,129,975 | 67,130,253 | 278    | Loss |
| DEL00003871 | chr1 | 67,132,007 | 67,134,182 | 2,175  | Loss |
| DEL00003873 | chr1 | 67,139,852 | 67,139,945 | 93     | Loss |
| DEL00003876 | chr1 | 67,164,473 | 67,164,589 | 116    | Loss |
| DEL00003877 | chr1 | 67,190,938 | 67,193,079 | 2,141  | Loss |
| DEL00003887 | chr1 | 67,325,625 | 67,325,730 | 105    | Loss |
| DEL00003889 | chr1 | 67,363,215 | 67,363,401 | 186    | Loss |
| DEL00003890 | chr1 | 67,371,165 | 67,371,371 | 206    | Loss |
| DEL00003892 | chr1 | 67,434,935 | 67,434,987 | 52     | Loss |
| DEL00003893 | chr1 | 67,438,301 | 67,449,790 | 11,489 | Loss |
| DEL00003900 | chr1 | 67,469,952 | 67,470,043 | 91     | Loss |
| DEL00003901 | chr1 | 67,557,893 | 67,557,955 | 62     | Loss |
| DEL00003903 | chr1 | 67,597,427 | 67,597,581 | 154    | Loss |
| DEL00003913 | chr1 | 67,982,690 | 67,984,582 | 1,892  | Loss |
| DEL00003914 | chr1 | 68,002,145 | 68,003,117 | 972    | Loss |
| DEL00003917 | chr1 | 68,036,509 | 68,036,564 | 55     | Loss |
| DEL00003921 | chr1 | 68,084,955 | 68,085,384 | 429    | Loss |
| DEL00003923 | chr1 | 68,088,732 | 68,088,799 | 67     | Loss |
| DEL00003926 | chr1 | 68,175,260 | 68,175,374 | 114    | Loss |
| DEL00003930 | chr1 | 68,305,711 | 68,306,145 | 434    | Loss |
| DEL00003934 | chr1 | 68,329,237 | 68,329,520 | 283    | Loss |
| DEL00003936 | chr1 | 68,340,848 | 68,340,995 | 147    | Loss |
| DEL00003937 | chr1 | 68,365,133 | 68,365,375 | 242    | Loss |
| DEL00003939 | chr1 | 68,374,960 | 68,375,026 | 66     | Loss |
| DEL00003942 | chr1 | 68,479,105 | 68,479,700 | 595    | Loss |
| DEL00003947 | chr1 | 68,558,720 | 68,559,503 | 783    | Loss |
| DEL00003949 | chr1 | 68,606,293 | 68,606,725 | 432    | Loss |
| DEL00003952 | chr1 | 68,661,866 | 68,661,919 | 53     | Loss |
| DEL00003956 | chr1 | 68,721,822 | 68,722,093 | 271    | Loss |
| DEL00003957 | chr1 | 68,735,052 | 68,735,520 | 468    | Loss |
| DEL00003960 | chr1 | 68,821,922 | 68,822,487 | 565    | Loss |
| DEL00003964 | chr1 | 68,887,425 | 68,887,672 | 247    | Loss |
| DEL00003970 | chr1 | 69,047,938 | 69,048,180 | 242    | Loss |
| DEL00003971 | chr1 | 69,054,743 | 69,054,961 | 218    | Loss |
| DEL00003977 | chr1 | 69,101,173 | 69,101,366 | 193    | Loss |
| DEL00003978 | chr1 | 69,117,204 | 69,117,261 | 57     | Loss |
| DEL00003979 | chr1 | 69,157,070 | 69,157,184 | 114    | Loss |

|             |      |            |            |       |      |
|-------------|------|------------|------------|-------|------|
| DEL00003984 | chr1 | 69,308,692 | 69,308,745 | 53    | Loss |
| DEL00003986 | chr1 | 69,375,146 | 69,375,463 | 317   | Loss |
| DEL00003987 | chr1 | 69,409,156 | 69,409,314 | 158   | Loss |
| DEL00003994 | chr1 | 69,543,490 | 69,544,026 | 536   | Loss |
| DEL00003999 | chr1 | 69,616,207 | 69,616,613 | 406   | Loss |
| DEL00004001 | chr1 | 69,626,896 | 69,627,079 | 183   | Loss |
| DEL00004006 | chr1 | 69,665,273 | 69,665,353 | 80    | Loss |
| DEL00004007 | chr1 | 69,675,977 | 69,676,057 | 80    | Loss |
| DEL00004012 | chr1 | 69,723,648 | 69,723,826 | 178   | Loss |
| DEL00004015 | chr1 | 69,725,429 | 69,725,782 | 353   | Loss |
| DEL00004022 | chr1 | 69,897,517 | 69,897,750 | 233   | Loss |
| DEL00004026 | chr1 | 69,947,880 | 69,948,211 | 331   | Loss |
| DEL00004029 | chr1 | 70,033,333 | 70,033,391 | 58    | Loss |
| DEL00004032 | chr1 | 70,073,598 | 70,074,073 | 475   | Loss |
| DEL00004034 | chr1 | 70,238,122 | 70,238,327 | 205   | Loss |
| DEL00004035 | chr1 | 70,263,284 | 70,263,517 | 233   | Loss |
| DEL00004036 | chr1 | 70,281,805 | 70,282,377 | 572   | Loss |
| DUP00004047 | chr1 | 70,412,994 | 70,413,297 | 303   | Gain |
| DEL00004049 | chr1 | 70,459,919 | 70,460,061 | 142   | Loss |
| DEL00004050 | chr1 | 70,460,747 | 70,460,902 | 155   | Loss |
| DEL00004055 | chr1 | 70,541,129 | 70,541,969 | 840   | Loss |
| DEL00004057 | chr1 | 70,626,839 | 70,627,194 | 355   | Loss |
| DEL00004058 | chr1 | 70,632,799 | 70,632,852 | 53    | Loss |
| DEL00004059 | chr1 | 70,658,953 | 70,659,090 | 137   | Loss |
| DEL00004061 | chr1 | 70,731,139 | 70,731,190 | 51    | Loss |
| DEL00004064 | chr1 | 70,801,409 | 70,801,878 | 469   | Loss |
| DEL00004067 | chr1 | 70,827,694 | 70,827,769 | 75    | Loss |
| DUP00004071 | chr1 | 70,892,912 | 70,893,025 | 113   | Gain |
| DEL00004087 | chr1 | 71,214,198 | 71,214,265 | 67    | Loss |
| DEL00004092 | chr1 | 71,266,146 | 71,266,211 | 65    | Loss |
| DEL00004094 | chr1 | 71,392,126 | 71,393,601 | 1,475 | Loss |
| DEL00004128 | chr1 | 71,542,943 | 71,544,122 | 1,179 | Loss |
| DEL00004132 | chr1 | 71,584,762 | 71,584,837 | 75    | Loss |
| DEL00004139 | chr1 | 71,860,495 | 71,860,940 | 445   | Loss |
| DEL00004141 | chr1 | 71,927,519 | 71,928,646 | 1,127 | Loss |
| DEL00004145 | chr1 | 72,020,007 | 72,020,103 | 96    | Loss |
| DEL00004146 | chr1 | 72,068,169 | 72,068,870 | 701   | Loss |
| DEL00004150 | chr1 | 72,160,583 | 72,160,796 | 213   | Loss |
| DEL00004152 | chr1 | 72,174,819 | 72,174,967 | 148   | Loss |
| DEL00004154 | chr1 | 72,241,861 | 72,241,936 | 75    | Loss |
| DEL00004155 | chr1 | 72,247,638 | 72,247,692 | 54    | Loss |
| DEL00004157 | chr1 | 72,254,952 | 72,255,290 | 338   | Loss |
| DEL00004165 | chr1 | 72,428,011 | 72,428,076 | 65    | Loss |
| DEL00004167 | chr1 | 72,440,951 | 72,441,118 | 167   | Loss |
| DEL00004168 | chr1 | 72,567,085 | 72,567,146 | 61    | Loss |
| DEL00004169 | chr1 | 72,622,161 | 72,622,335 | 174   | Loss |
| DEL00004170 | chr1 | 72,637,735 | 72,639,401 | 1,666 | Loss |
| DEL00004171 | chr1 | 72,747,403 | 72,750,360 | 2,957 | Loss |
| DEL00004214 | chr1 | 72,950,235 | 72,950,476 | 241   | Loss |



|             |      |            |            |        |      |
|-------------|------|------------|------------|--------|------|
| DEL00004218 | chr1 | 73,049,776 | 73,049,828 | 52     | Loss |
| DEL00004226 | chr1 | 73,448,828 | 73,449,551 | 723    | Loss |
| DEL00004228 | chr1 | 73,467,235 | 73,468,241 | 1,006  | Loss |
| DEL00004229 | chr1 | 73,469,239 | 73,469,309 | 70     | Loss |
| DEL00004235 | chr1 | 73,665,905 | 73,665,972 | 67     | Loss |
| DEL00004238 | chr1 | 73,694,174 | 73,694,683 | 509    | Loss |
| DEL00004246 | chr1 | 73,932,753 | 73,933,216 | 463    | Loss |
| DEL00004251 | chr1 | 74,031,396 | 74,031,594 | 198    | Loss |
| DEL00004257 | chr1 | 74,450,889 | 74,451,226 | 337    | Loss |
| DEL00004267 | chr1 | 75,564,186 | 75,566,711 | 2,525  | Loss |
| DEL00004268 | chr1 | 75,636,773 | 75,636,895 | 122    | Loss |
| DEL00004271 | chr1 | 75,952,661 | 75,952,770 | 109    | Loss |
| DEL00004277 | chr1 | 76,173,297 | 76,174,569 | 1,272  | Loss |
| DEL00004278 | chr1 | 76,205,467 | 76,205,631 | 164    | Loss |
| DEL00004283 | chr1 | 76,453,944 | 76,454,770 | 826    | Loss |
| DEL00004285 | chr1 | 76,501,397 | 76,501,742 | 345    | Loss |
| DEL00004286 | chr1 | 76,519,971 | 76,520,072 | 101    | Loss |
| DEL00004294 | chr1 | 76,915,615 | 76,916,729 | 1,114  | Loss |
| DEL00004302 | chr1 | 77,014,980 | 77,015,078 | 98     | Loss |
| DEL00004310 | chr1 | 77,053,154 | 77,053,276 | 122    | Loss |
| DEL00004311 | chr1 | 77,059,203 | 77,059,644 | 441    | Loss |
| DEL00004313 | chr1 | 77,132,423 | 77,132,572 | 149    | Loss |
| DEL00004317 | chr1 | 77,240,071 | 77,240,203 | 132    | Loss |
| DEL00004329 | chr1 | 77,742,265 | 77,742,348 | 83     | Loss |
| DEL00004333 | chr1 | 77,838,581 | 77,839,010 | 429    | Loss |
| DEL00004335 | chr1 | 77,858,607 | 77,858,681 | 74     | Loss |
| DEL00004337 | chr1 | 77,960,397 | 77,960,880 | 483    | Loss |
| DEL00004348 | chr1 | 78,189,231 | 78,189,918 | 687    | Loss |
| DEL00004349 | chr1 | 78,197,665 | 78,197,718 | 53     | Loss |
| DEL00004350 | chr1 | 78,200,797 | 78,200,951 | 154    | Loss |
| DEL00004405 | chr1 | 78,277,407 | 78,278,084 | 677    | Loss |
| DEL00004407 | chr1 | 78,302,206 | 78,302,295 | 89     | Loss |
| DEL00004408 | chr1 | 78,313,758 | 78,314,297 | 539    | Loss |
| DEL00004411 | chr1 | 78,320,361 | 78,322,585 | 2,224  | Loss |
| DEL00004412 | chr1 | 78,332,297 | 78,333,143 | 846    | Loss |
| DEL00004413 | chr1 | 78,336,099 | 78,336,156 | 57     | Loss |
| DEL00004415 | chr1 | 78,370,241 | 78,371,877 | 1,636  | Loss |
| DEL00004416 | chr1 | 78,380,033 | 78,382,685 | 2,652  | Loss |
| DEL00004417 | chr1 | 78,385,797 | 78,391,576 | 5,779  | Loss |
| DEL00004419 | chr1 | 78,431,326 | 78,431,784 | 458    | Loss |
| DEL00004421 | chr1 | 78,460,885 | 78,462,088 | 1,203  | Loss |
| DEL00004426 | chr1 | 78,497,891 | 78,498,882 | 991    | Loss |
| DEL00004456 | chr1 | 78,537,716 | 78,539,059 | 1,343  | Loss |
| DUP00004461 | chr1 | 78,542,026 | 78,555,032 | 13,006 | Gain |
| DEL00004486 | chr1 | 78,564,142 | 78,633,747 | 69,605 | Loss |
| DEL00004548 | chr1 | 78,741,473 | 78,741,693 | 220    | Loss |
| DEL00004550 | chr1 | 78,743,888 | 78,744,209 | 321    | Loss |
| DEL00004553 | chr1 | 78,769,553 | 78,769,622 | 69     | Loss |
| DEL00004558 | chr1 | 78,799,204 | 78,799,260 | 56     | Loss |

|             |      |            |            |       |       |
|-------------|------|------------|------------|-------|-------|
| DEL00004560 | chr1 | 78,816,016 | 78,816,426 | 410   | Loss  |
| DEL00004563 | chr1 | 78,854,421 | 78,854,717 | 296   | Loss  |
| DEL00004590 | chr1 | 79,046,544 | 79,046,694 | 150   | Loss  |
| DEL00004597 | chr1 | 79,125,771 | 79,127,442 | 1,671 | Loss  |
| DEL00004598 | chr1 | 79,133,962 | 79,134,111 | 149   | Loss  |
| DEL00004602 | chr1 | 79,202,910 | 79,202,991 | 81    | Loss  |
| DEL00004604 | chr1 | 79,228,923 | 79,230,067 | 1,144 | Loss  |
| DUP00004610 | chr1 | 79,281,621 | 79,281,699 | 78    | Gain  |
| DEL00004613 | chr1 | 79,451,512 | 79,451,648 | 136   | Loss  |
| DEL00004617 | chr1 | 79,527,059 | 79,527,144 | 85    | Loss  |
| DEL00004619 | chr1 | 79,578,450 | 79,578,573 | 123   | Loss  |
| DEL00004621 | chr1 | 79,589,922 | 79,590,092 | 170   | Loss  |
| DEL00004623 | chr1 | 79,681,845 | 79,682,057 | 212   | Loss  |
| DEL00004624 | chr1 | 79,702,693 | 79,702,900 | 207   | Loss  |
| DEL00004625 | chr1 | 79,704,313 | 79,704,405 | 92    | Loss  |
| DEL00004634 | chr1 | 79,899,997 | 79,900,610 | 613   | Loss  |
| DEL00004637 | chr1 | 80,011,398 | 80,011,565 | 167   | Loss  |
| DEL00004638 | chr1 | 80,055,304 | 80,055,563 | 259   | Loss  |
| DEL00004647 | chr1 | 80,169,640 | 80,169,929 | 289   | Loss  |
| DEL00004652 | chr1 | 80,241,840 | 80,242,556 | 716   | Loss  |
| DEL00004657 | chr1 | 80,322,130 | 80,322,367 | 237   | Loss  |
| DEL00004663 | chr1 | 80,370,552 | 80,370,703 | 151   | Loss  |
| DEL00004672 | chr1 | 80,700,604 | 80,701,059 | 455   | Loss  |
| DEL00004675 | chr1 | 80,770,548 | 80,771,315 | 767   | Loss  |
| DEL00004679 | chr1 | 80,939,130 | 80,939,793 | 663   | Loss  |
| DEL00004683 | chr1 | 80,955,103 | 80,955,307 | 204   | Loss  |
| DEL00004684 | chr1 | 81,060,531 | 81,060,785 | 254   | Loss  |
| DEL00004687 | chr1 | 81,070,417 | 81,070,519 | 102   | Loss  |
| DEL00004688 | chr1 | 81,075,481 | 81,075,604 | 123   | Loss  |
| DEL00004696 | chr1 | 81,255,753 | 81,255,982 | 229   | Loss  |
| DEL00004702 | chr1 | 81,348,885 | 81,349,043 | 158   | Loss  |
| DEL00004703 | chr1 | 81,413,861 | 81,414,122 | 261   | Loss  |
| DEL00004709 | chr1 | 81,556,050 | 81,556,105 | 55    | Loss  |
| DEL00004713 | chr1 | 81,643,697 | 81,643,750 | 53    | Loss  |
| DEL00004720 | chr1 | 81,865,993 | 81,866,123 | 130   | Loss  |
| DEL00004725 | chr1 | 81,966,498 | 81,966,690 | 192   | Loss  |
| DEL00004726 | chr1 | 81,987,997 | 81,988,064 | 67    | Loss  |
| DEL00004728 | chr1 | 82,052,708 | 82,053,018 | 310   | Loss  |
| DEL00004731 | chr1 | 82,156,939 | 82,157,029 | 90    | Loss  |
| DEL00004732 | chr1 | 82,201,958 | 82,202,212 | 254   | Loss  |
| DEL00004737 | chr1 | 82,312,568 | 82,312,699 | 131   | Loss  |
| DEL00004744 | chr1 | 82,766,472 | 82,766,980 | 508   | Loss  |
| DEL00004749 | chr1 | 82,848,760 | 82,848,817 | 57    | Loss  |
| DEL00004752 | chr1 | 82,977,235 | 82,977,492 | 257   | Loss  |
| DEL00004756 | chr1 | 83,030,073 | 83,030,135 | 62    | Loss  |
| DEL00004758 | chr1 | 83,174,332 | 83,174,389 | 57    | Loss  |
| DUP00004765 | chr1 | 83,439,771 | 83,440,037 | 266   | Gain  |
| DEL00004770 | chr1 | 83,572,613 | 83,573,241 | 628   | Loss  |
| DUP00004774 | chr1 | 83,580,058 | 83,584,164 | 4,106 | Mixed |

|             |      |            |            |         |       |
|-------------|------|------------|------------|---------|-------|
| DUP00004779 | chr1 | 83,612,008 | 83,612,422 | 414     | Gain  |
| DEL00004785 | chr1 | 83,614,449 | 83,614,899 | 450     | Loss  |
| DEL00004794 | chr1 | 83,617,610 | 83,617,961 | 351     | Loss  |
| DUP00004800 | chr1 | 83,619,010 | 83,619,531 | 521     | Gain  |
| DUP00004808 | chr1 | 83,620,082 | 83,660,434 | 40,352  | Mixed |
| DUP00004985 | chr1 | 83,665,992 | 83,671,424 | 5,432   | Gain  |
| DUP00005029 | chr1 | 83,709,367 | 83,709,690 | 323     | Gain  |
| DUP00005046 | chr1 | 83,718,112 | 83,718,654 | 542     | Gain  |
| DUP00005106 | chr1 | 83,767,454 | 83,768,098 | 644     | Gain  |
| DUP00005255 | chr1 | 83,885,405 | 83,885,828 | 423     | Gain  |
| DUP00005433 | chr1 | 84,025,686 | 84,026,005 | 319     | Gain  |
| DEL00005444 | chr1 | 84,089,651 | 84,089,889 | 238     | Loss  |
| DEL00005450 | chr1 | 84,274,972 | 84,275,984 | 1,012   | Loss  |
| DEL00005459 | chr1 | 84,428,372 | 84,428,524 | 152     | Loss  |
| DEL00005462 | chr1 | 84,430,986 | 84,431,233 | 247     | Loss  |
| DEL00005466 | chr1 | 84,578,258 | 84,578,711 | 453     | Loss  |
| DEL00005467 | chr1 | 84,596,102 | 84,597,375 | 1,273   | Loss  |
| DEL00005469 | chr1 | 84,638,675 | 84,638,759 | 84      | Loss  |
| DEL00005470 | chr1 | 84,673,188 | 84,673,239 | 51      | Loss  |
| DEL00005477 | chr1 | 84,837,416 | 84,837,472 | 56      | Loss  |
| DEL00005490 | chr1 | 85,049,987 | 85,050,048 | 61      | Loss  |
| DUP00005494 | chr1 | 85,187,628 | 85,830,381 | 642,753 | Mixed |
| DEL00005542 | chr1 | 85,835,510 | 85,836,189 | 679     | Loss  |
| DUP00005546 | chr1 | 85,907,872 | 85,917,400 | 9,528   | Gain  |
| DEL00005552 | chr1 | 85,982,332 | 85,982,395 | 63      | Loss  |
| DEL00005553 | chr1 | 86,018,852 | 86,019,351 | 499     | Loss  |
| DEL00005555 | chr1 | 86,023,982 | 86,024,132 | 150     | Loss  |
| DEL00005556 | chr1 | 86,026,583 | 86,026,645 | 62      | Loss  |
| DEL00005558 | chr1 | 86,041,079 | 86,041,356 | 277     | Loss  |
| DEL00005563 | chr1 | 86,092,247 | 86,092,299 | 52      | Loss  |
| DEL00005569 | chr1 | 86,318,931 | 86,319,283 | 352     | Loss  |
| DEL00005571 | chr1 | 86,322,126 | 86,322,291 | 165     | Loss  |
| DEL00005572 | chr1 | 86,375,441 | 86,375,563 | 122     | Loss  |
| DEL00005573 | chr1 | 86,390,100 | 86,390,185 | 85      | Loss  |
| DEL00005574 | chr1 | 86,428,872 | 86,429,934 | 1,062   | Loss  |
| DEL00005576 | chr1 | 86,451,543 | 86,452,078 | 535     | Loss  |
| DEL00005577 | chr1 | 86,471,428 | 86,471,600 | 172     | Loss  |
| DEL00005578 | chr1 | 86,474,082 | 86,474,742 | 660     | Loss  |
| DEL00005580 | chr1 | 86,559,951 | 86,560,110 | 159     | Loss  |
| DEL00005584 | chr1 | 86,600,635 | 86,602,550 | 1,915   | Loss  |
| DEL00005586 | chr1 | 86,641,108 | 86,641,219 | 111     | Loss  |
| DEL00005589 | chr1 | 86,800,320 | 86,804,742 | 4,422   | Loss  |
| DEL00005590 | chr1 | 86,843,312 | 86,844,698 | 1,386   | Loss  |
| DEL00005591 | chr1 | 86,845,981 | 86,846,294 | 313     | Loss  |
| DEL00005593 | chr1 | 86,900,186 | 86,901,326 | 1,140   | Loss  |
| DEL00005594 | chr1 | 87,027,426 | 87,027,483 | 57      | Loss  |
| DEL00005596 | chr1 | 87,060,007 | 87,060,088 | 81      | Loss  |
| DEL00005598 | chr1 | 87,144,999 | 87,145,634 | 635     | Loss  |
| DEL00005602 | chr1 | 87,347,424 | 87,347,694 | 270     | Loss  |

|             |      |            |            |        |      |
|-------------|------|------------|------------|--------|------|
| DEL00005608 | chr1 | 87,524,966 | 87,525,859 | 893    | Loss |
| DEL00005612 | chr1 | 87,577,486 | 87,577,537 | 51     | Loss |
| DEL00005616 | chr1 | 87,628,215 | 87,628,267 | 52     | Loss |
| DEL00005628 | chr1 | 87,782,553 | 87,782,958 | 405    | Loss |
| DEL00005632 | chr1 | 87,870,170 | 87,871,535 | 1,365  | Loss |
| DEL00005633 | chr1 | 87,877,029 | 87,878,575 | 1,546  | Loss |
| DEL00005634 | chr1 | 87,881,014 | 87,881,067 | 53     | Loss |
| DEL00005636 | chr1 | 87,990,646 | 87,991,429 | 783    | Loss |
| DEL00005642 | chr1 | 88,070,512 | 88,070,702 | 190    | Loss |
| DEL00005650 | chr1 | 88,295,194 | 88,295,375 | 181    | Loss |
| DEL00005653 | chr1 | 88,344,917 | 88,345,044 | 127    | Loss |
| DEL00005654 | chr1 | 88,406,687 | 88,419,070 | 12,383 | Loss |
| DEL00005656 | chr1 | 88,425,702 | 88,425,793 | 91     | Loss |
| DEL00005659 | chr1 | 88,470,404 | 88,471,035 | 631    | Loss |
| DEL00005662 | chr1 | 88,506,794 | 88,506,865 | 71     | Loss |
| DEL00005665 | chr1 | 88,522,387 | 88,523,005 | 618    | Loss |
| DEL00005666 | chr1 | 88,567,377 | 88,567,440 | 63     | Loss |
| DEL00005668 | chr1 | 88,585,907 | 88,588,718 | 2,811  | Loss |
| DEL00005672 | chr1 | 88,630,965 | 88,631,405 | 440    | Loss |
| DEL00005673 | chr1 | 88,671,818 | 88,671,875 | 57     | Loss |
| DEL00005676 | chr1 | 88,717,228 | 88,717,350 | 122    | Loss |
| DEL00005682 | chr1 | 88,823,272 | 88,823,593 | 321    | Loss |
| DEL00005685 | chr1 | 88,824,042 | 88,824,415 | 373    | Loss |
| DEL00005686 | chr1 | 88,844,304 | 88,844,547 | 243    | Loss |
| DUP00005688 | chr1 | 88,893,097 | 88,893,248 | 151    | Gain |
| DEL00005690 | chr1 | 88,912,710 | 88,913,048 | 338    | Loss |
| DEL00005694 | chr1 | 89,025,434 | 89,025,542 | 108    | Loss |
| DEL00005696 | chr1 | 89,074,457 | 89,074,623 | 166    | Loss |
| DEL00005697 | chr1 | 89,078,160 | 89,079,944 | 1,784  | Loss |
| DEL00005699 | chr1 | 89,185,405 | 89,185,620 | 215    | Loss |
| DEL00005700 | chr1 | 89,209,739 | 89,209,968 | 229    | Loss |
| DEL00005703 | chr1 | 89,260,321 | 89,260,820 | 499    | Loss |
| DEL00005712 | chr1 | 89,447,157 | 89,447,527 | 370    | Loss |
| DEL00005714 | chr1 | 89,464,099 | 89,465,470 | 1,371  | Loss |
| DEL00005724 | chr1 | 89,646,456 | 89,646,512 | 56     | Loss |
| DEL00005725 | chr1 | 89,650,874 | 89,651,014 | 140    | Loss |
| DEL00005727 | chr1 | 89,693,770 | 89,693,832 | 62     | Loss |
| DEL00005729 | chr1 | 89,750,165 | 89,750,237 | 72     | Loss |
| DEL00005731 | chr1 | 89,775,521 | 89,775,767 | 246    | Loss |
| DEL00005732 | chr1 | 89,798,820 | 89,799,700 | 880    | Loss |
| DEL00005733 | chr1 | 89,803,180 | 89,803,909 | 729    | Loss |
| DEL00005740 | chr1 | 90,122,693 | 90,123,100 | 407    | Loss |
| DEL00005742 | chr1 | 90,159,611 | 90,160,123 | 512    | Loss |
| DEL00005745 | chr1 | 90,172,416 | 90,172,470 | 54     | Loss |
| DEL00005749 | chr1 | 90,382,976 | 90,383,078 | 102    | Loss |
| DEL00005750 | chr1 | 90,397,483 | 90,397,956 | 473    | Loss |
| DEL00005751 | chr1 | 90,397,976 | 90,398,031 | 55     | Loss |
| DEL00005752 | chr1 | 90,411,366 | 90,411,613 | 247    | Loss |
| DEL00005753 | chr1 | 90,440,272 | 90,440,325 | 53     | Loss |

|             |      |            |            |        |       |
|-------------|------|------------|------------|--------|-------|
| DEL00005757 | chr1 | 90,505,242 | 90,505,927 | 685    | Loss  |
| DUP00005759 | chr1 | 90,549,550 | 90,549,608 | 58     | Gain  |
| DEL00005760 | chr1 | 90,554,302 | 90,554,367 | 65     | Loss  |
| DEL00005761 | chr1 | 90,559,621 | 90,559,685 | 64     | Loss  |
| DEL00005764 | chr1 | 90,573,909 | 90,573,960 | 51     | Loss  |
| DEL00005770 | chr1 | 90,632,286 | 90,632,479 | 193    | Loss  |
| DEL00005771 | chr1 | 90,635,055 | 90,635,564 | 509    | Loss  |
| DEL00005774 | chr1 | 90,699,548 | 90,700,357 | 809    | Loss  |
| DEL00005780 | chr1 | 90,797,988 | 90,798,364 | 376    | Loss  |
| DEL00005785 | chr1 | 90,914,121 | 90,914,442 | 321    | Loss  |
| DEL00005786 | chr1 | 90,933,189 | 90,933,252 | 63     | Loss  |
| DEL00005794 | chr1 | 91,072,766 | 91,073,196 | 430    | Loss  |
| DEL00005796 | chr1 | 91,097,711 | 91,097,797 | 86     | Loss  |
| DEL00005797 | chr1 | 91,107,537 | 91,108,401 | 864    | Loss  |
| DEL00005799 | chr1 | 91,114,009 | 91,114,147 | 138    | Loss  |
| DEL00005801 | chr1 | 91,128,458 | 91,131,062 | 2,604  | Loss  |
| DEL00005803 | chr1 | 91,169,750 | 91,170,236 | 486    | Loss  |
| DEL00005805 | chr1 | 91,180,070 | 91,180,171 | 101    | Loss  |
| DEL00005807 | chr1 | 91,189,059 | 91,189,127 | 68     | Loss  |
| DEL00005808 | chr1 | 91,191,027 | 91,191,791 | 764    | Loss  |
| DEL00005809 | chr1 | 91,216,565 | 91,217,057 | 492    | Loss  |
| DEL00005811 | chr1 | 91,217,924 | 91,218,172 | 248    | Loss  |
| DEL00005814 | chr1 | 91,242,165 | 91,242,368 | 203    | Loss  |
| DEL00005820 | chr1 | 91,294,809 | 91,295,129 | 320    | Loss  |
| DEL00005821 | chr1 | 91,299,817 | 91,299,874 | 57     | Loss  |
| DEL00005827 | chr1 | 91,347,027 | 91,347,348 | 321    | Loss  |
| DEL00005828 | chr1 | 91,350,452 | 91,350,596 | 144    | Loss  |
| DEL00005830 | chr1 | 91,376,324 | 91,377,483 | 1,159  | Loss  |
| DEL00005832 | chr1 | 91,446,661 | 91,446,883 | 222    | Loss  |
| DUP00005834 | chr1 | 91,474,679 | 91,499,101 | 24,422 | Mixed |
| DUP00005841 | chr1 | 91,530,671 | 91,530,853 | 182    | Gain  |
| DEL00005844 | chr1 | 91,577,203 | 91,578,110 | 907    | Loss  |
| DEL00005845 | chr1 | 91,578,637 | 91,578,882 | 245    | Loss  |
| DEL00005846 | chr1 | 91,593,261 | 91,593,916 | 655    | Loss  |
| DEL00005847 | chr1 | 91,596,767 | 91,597,166 | 399    | Loss  |
| DEL00005854 | chr1 | 91,694,607 | 91,694,736 | 129    | Loss  |
| DEL00005855 | chr1 | 91,719,093 | 91,719,450 | 357    | Loss  |
| DEL00005860 | chr1 | 91,761,208 | 91,761,600 | 392    | Loss  |
| DEL00005863 | chr1 | 91,783,832 | 91,783,913 | 81     | Loss  |
| DEL00005875 | chr1 | 91,958,643 | 91,958,697 | 54     | Loss  |
| DEL00005881 | chr1 | 92,013,833 | 92,013,898 | 65     | Loss  |
| DEL00005888 | chr1 | 92,149,362 | 92,149,466 | 104    | Loss  |
| DEL00005891 | chr1 | 92,158,184 | 92,158,237 | 53     | Loss  |
| DEL00005892 | chr1 | 92,160,911 | 92,161,027 | 116    | Loss  |
| DEL00005898 | chr1 | 92,256,939 | 92,257,665 | 726    | Loss  |
| DEL00005899 | chr1 | 92,276,116 | 92,276,608 | 492    | Loss  |
| DEL00005902 | chr1 | 92,290,642 | 92,290,700 | 58     | Loss  |
| DEL00005912 | chr1 | 92,368,903 | 92,369,014 | 111    | Loss  |
| DEL00005913 | chr1 | 92,405,211 | 92,405,287 | 76     | Loss  |

|             |      |            |            |        |      |
|-------------|------|------------|------------|--------|------|
| DEL00005916 | chr1 | 92,411,570 | 92,411,708 | 138    | Loss |
| DEL00005918 | chr1 | 92,486,420 | 92,486,808 | 388    | Loss |
| DEL00005920 | chr1 | 92,525,490 | 92,525,601 | 111    | Loss |
| DEL00005924 | chr1 | 92,555,036 | 92,561,848 | 6,812  | Loss |
| DEL00005925 | chr1 | 92,595,275 | 92,595,742 | 467    | Loss |
| DEL00005926 | chr1 | 92,616,200 | 92,618,508 | 2,308  | Loss |
| DEL00005927 | chr1 | 92,625,430 | 92,627,375 | 1,945  | Loss |
| DEL00005929 | chr1 | 92,667,768 | 92,667,837 | 69     | Loss |
| DEL00005932 | chr1 | 92,719,426 | 92,719,808 | 382    | Loss |
| DEL00005933 | chr1 | 92,728,123 | 92,728,255 | 132    | Loss |
| DEL00005940 | chr1 | 92,851,560 | 92,851,663 | 103    | Loss |
| DEL00005942 | chr1 | 92,876,355 | 92,876,427 | 72     | Loss |
| DEL00005950 | chr1 | 92,987,849 | 92,988,224 | 375    | Loss |
| DEL00005953 | chr1 | 93,112,168 | 93,112,219 | 51     | Loss |
| DEL00005960 | chr1 | 93,307,634 | 93,308,539 | 905    | Loss |
| DEL00005964 | chr1 | 93,340,431 | 93,343,521 | 3,090  | Loss |
| DEL00005965 | chr1 | 93,348,684 | 93,348,759 | 75     | Loss |
| DEL00005966 | chr1 | 93,351,763 | 93,352,098 | 335    | Loss |
| DEL00005971 | chr1 | 93,374,280 | 93,374,796 | 516    | Loss |
| DEL00005974 | chr1 | 93,402,332 | 93,402,892 | 560    | Loss |
| DUP00005975 | chr1 | 93,410,536 | 93,410,804 | 268    | Gain |
| DEL00005977 | chr1 | 93,450,710 | 93,450,804 | 94     | Loss |
| DEL00005981 | chr1 | 93,556,300 | 93,556,536 | 236    | Loss |
| DEL00005982 | chr1 | 93,558,840 | 93,562,024 | 3,184  | Loss |
| DEL00005991 | chr1 | 93,657,897 | 93,657,956 | 59     | Loss |
| DEL00005992 | chr1 | 93,674,963 | 93,675,328 | 365    | Loss |
| DEL00005999 | chr1 | 93,915,980 | 93,916,129 | 149    | Loss |
| DEL00006002 | chr1 | 94,002,017 | 94,002,229 | 212    | Loss |
| DEL00006004 | chr1 | 94,040,345 | 94,040,604 | 259    | Loss |
| DEL00006016 | chr1 | 94,296,585 | 94,297,904 | 1,319  | Loss |
| DEL00006017 | chr1 | 94,305,179 | 94,305,265 | 86     | Loss |
| DEL00006019 | chr1 | 94,450,125 | 94,452,167 | 2,042  | Loss |
| DEL00006023 | chr1 | 94,569,486 | 94,571,751 | 2,265  | Loss |
| DUP00006030 | chr1 | 94,733,765 | 94,734,081 | 316    | Gain |
| DEL00006031 | chr1 | 94,747,933 | 94,748,732 | 799    | Loss |
| DEL00006034 | chr1 | 94,858,207 | 94,858,549 | 342    | Loss |
| DEL00006039 | chr1 | 95,072,966 | 95,073,021 | 55     | Loss |
| DEL00006045 | chr1 | 95,160,137 | 95,160,567 | 430    | Loss |
| DEL00006047 | chr1 | 95,177,121 | 95,179,458 | 2,337  | Loss |
| DEL00006049 | chr1 | 95,194,510 | 95,195,925 | 1,415  | Loss |
| DEL00006052 | chr1 | 95,237,682 | 95,238,631 | 949    | Loss |
| DEL00006054 | chr1 | 95,364,889 | 95,379,845 | 14,956 | Loss |
| DEL00006055 | chr1 | 95,381,575 | 95,381,735 | 160    | Loss |
| DEL00006057 | chr1 | 95,591,509 | 95,593,898 | 2,389  | Loss |
| DEL00006060 | chr1 | 95,634,623 | 95,634,872 | 249    | Loss |
| DEL00006061 | chr1 | 95,645,777 | 95,646,007 | 230    | Loss |
| DEL00006062 | chr1 | 95,653,509 | 95,653,934 | 425    | Loss |
| DEL00006063 | chr1 | 95,656,517 | 95,659,023 | 2,506  | Loss |
| DEL00006065 | chr1 | 95,661,254 | 95,661,586 | 332    | Loss |

|             |      |            |            |        |      |
|-------------|------|------------|------------|--------|------|
| DEL00006068 | chr1 | 95,725,626 | 95,726,062 | 436    | Loss |
| DEL00006071 | chr1 | 95,780,311 | 95,782,679 | 2,368  | Loss |
| DEL00006073 | chr1 | 95,794,860 | 95,795,191 | 331    | Loss |
| DEL00006074 | chr1 | 95,799,365 | 95,800,205 | 840    | Loss |
| DEL00006078 | chr1 | 95,833,985 | 95,857,348 | 23,363 | Loss |
| DEL00006080 | chr1 | 95,915,926 | 95,918,050 | 2,124  | Loss |
| DEL00006083 | chr1 | 95,959,036 | 95,959,214 | 178    | Loss |
| DEL00006090 | chr1 | 96,019,422 | 96,019,515 | 93     | Loss |
| DEL00006092 | chr1 | 96,033,798 | 96,034,031 | 233    | Loss |
| DUP00006097 | chr1 | 96,223,330 | 96,224,017 | 687    | Gain |
| DEL00006105 | chr1 | 96,311,678 | 96,312,419 | 741    | Loss |
| DEL00006115 | chr1 | 96,377,958 | 96,378,193 | 235    | Loss |
| DEL00006116 | chr1 | 96,428,066 | 96,428,171 | 105    | Loss |
| DEL00006118 | chr1 | 96,475,623 | 96,482,693 | 7,070  | Loss |
| DEL00006121 | chr1 | 96,537,083 | 96,537,942 | 859    | Loss |
| DEL00006127 | chr1 | 96,694,217 | 96,694,303 | 86     | Loss |
| DEL00006128 | chr1 | 96,740,149 | 96,740,216 | 67     | Loss |
| DEL00006131 | chr1 | 96,772,606 | 96,772,684 | 78     | Loss |
| DEL00006132 | chr1 | 96,803,046 | 96,804,575 | 1,529  | Loss |
| DEL00006134 | chr1 | 96,832,893 | 96,833,313 | 420    | Loss |
| DEL00006136 | chr1 | 96,851,670 | 96,856,327 | 4,657  | Loss |
| DEL00006139 | chr1 | 96,947,962 | 96,948,226 | 264    | Loss |
| DEL00006145 | chr1 | 97,295,166 | 97,295,417 | 251    | Loss |
| DEL00006147 | chr1 | 97,326,825 | 97,327,151 | 326    | Loss |
| DEL00006148 | chr1 | 97,338,407 | 97,338,944 | 537    | Loss |
| DEL00006154 | chr1 | 97,674,557 | 97,675,091 | 534    | Loss |
| DEL00006164 | chr1 | 97,831,755 | 97,832,059 | 304    | Loss |
| DEL00006166 | chr1 | 97,986,412 | 97,986,477 | 65     | Loss |
| DEL00006168 | chr1 | 98,030,909 | 98,032,443 | 1,534  | Loss |
| DEL00006169 | chr1 | 98,083,954 | 98,084,876 | 922    | Loss |
| DEL00006172 | chr1 | 98,396,222 | 98,397,164 | 942    | Loss |
| DEL00006173 | chr1 | 98,415,127 | 98,415,619 | 492    | Loss |
| DEL00006176 | chr1 | 98,643,428 | 98,643,590 | 162    | Loss |
| DEL00006177 | chr1 | 98,651,558 | 98,651,637 | 79     | Loss |
| DEL00006179 | chr1 | 98,724,626 | 98,725,115 | 489    | Loss |
| DEL00006180 | chr1 | 98,728,841 | 98,729,942 | 1,101  | Loss |
| DEL00006181 | chr1 | 98,772,095 | 98,772,235 | 140    | Loss |
| DEL00006182 | chr1 | 98,788,773 | 98,788,974 | 201    | Loss |
| DEL00006188 | chr1 | 98,904,759 | 98,905,471 | 712    | Loss |
| DEL00006189 | chr1 | 98,925,128 | 98,925,196 | 68     | Loss |
| DEL00006193 | chr1 | 98,954,061 | 98,954,127 | 66     | Loss |
| DEL00006197 | chr1 | 99,077,175 | 99,077,239 | 64     | Loss |
| DEL00006206 | chr1 | 99,360,498 | 99,360,640 | 142    | Loss |
| DEL00006209 | chr1 | 99,389,335 | 99,389,803 | 468    | Loss |
| DEL00006212 | chr1 | 99,464,686 | 99,464,812 | 126    | Loss |
| DEL00006215 | chr1 | 99,502,146 | 99,502,247 | 101    | Loss |
| DEL00006220 | chr1 | 99,571,875 | 99,572,485 | 610    | Loss |
| DEL00006222 | chr1 | 99,641,018 | 99,641,314 | 296    | Loss |
| DEL00006225 | chr1 | 99,754,333 | 99,754,426 | 93     | Loss |

|             |      |             |             |         |      |
|-------------|------|-------------|-------------|---------|------|
| DEL00006226 | chr1 | 99,770,305  | 99,770,356  | 51      | Loss |
| DEL00006231 | chr1 | 99,997,847  | 99,998,031  | 184     | Loss |
| DEL00006235 | chr1 | 100,058,055 | 100,058,125 | 70      | Loss |
| DEL00006238 | chr1 | 100,130,528 | 100,130,658 | 130     | Loss |
| DEL00006240 | chr1 | 100,182,876 | 100,183,469 | 593     | Loss |
| DEL00006242 | chr1 | 100,232,842 | 100,233,548 | 706     | Loss |
| DEL00006243 | chr1 | 100,235,134 | 100,236,039 | 905     | Loss |
| DEL00006245 | chr1 | 100,245,957 | 100,246,435 | 478     | Loss |
| DEL00006247 | chr1 | 100,260,607 | 100,260,815 | 208     | Loss |
| DEL00006248 | chr1 | 100,273,378 | 100,273,520 | 142     | Loss |
| DEL00006249 | chr1 | 100,304,778 | 100,306,077 | 1,299   | Loss |
| DEL00006251 | chr1 | 100,381,984 | 100,382,138 | 154     | Loss |
| DEL00006252 | chr1 | 100,411,226 | 100,411,915 | 689     | Loss |
| DEL00006254 | chr1 | 100,479,393 | 100,480,308 | 915     | Loss |
| DEL00006255 | chr1 | 100,497,206 | 100,497,429 | 223     | Loss |
| DEL00006257 | chr1 | 100,514,255 | 100,514,331 | 76      | Loss |
| DEL00006260 | chr1 | 100,574,216 | 100,574,331 | 115     | Loss |
| DEL00006271 | chr1 | 100,738,005 | 100,738,061 | 56      | Loss |
| DEL00006272 | chr1 | 100,741,530 | 100,741,676 | 146     | Loss |
| DEL00006273 | chr1 | 100,743,218 | 100,743,767 | 549     | Loss |
| DEL00006276 | chr1 | 100,770,692 | 100,770,829 | 137     | Loss |
| DEL00006282 | chr1 | 100,818,176 | 100,820,590 | 2,414   | Loss |
| DEL00006283 | chr1 | 100,848,652 | 100,848,748 | 96      | Loss |
| DEL00006289 | chr1 | 100,906,815 | 100,906,902 | 87      | Loss |
| DEL00006290 | chr1 | 100,944,907 | 100,945,326 | 419     | Loss |
| DEL00006291 | chr1 | 100,957,372 | 100,957,514 | 142     | Loss |
| DEL00006293 | chr1 | 100,960,739 | 100,961,161 | 422     | Loss |
| DEL00006294 | chr1 | 101,000,285 | 101,000,986 | 701     | Loss |
| DEL00006296 | chr1 | 101,010,051 | 101,010,227 | 176     | Loss |
| DEL00006297 | chr1 | 101,055,133 | 101,055,644 | 511     | Loss |
| DEL00006298 | chr1 | 101,082,096 | 101,082,148 | 52      | Loss |
| DEL00006302 | chr1 | 101,156,985 | 101,159,555 | 2,570   | Loss |
| DEL00006306 | chr1 | 101,171,508 | 101,171,735 | 227     | Loss |
| DEL00006307 | chr1 | 101,200,308 | 101,202,302 | 1,994   | Loss |
| DEL00006310 | chr1 | 101,231,386 | 101,231,870 | 484     | Loss |
| DEL00006311 | chr1 | 101,234,388 | 101,237,248 | 2,860   | Loss |
| DEL00006312 | chr1 | 101,244,985 | 101,245,129 | 144     | Loss |
| DEL00006313 | chr1 | 101,356,512 | 101,357,007 | 495     | Loss |
| DEL00006316 | chr1 | 101,480,661 | 101,480,971 | 310     | Loss |
| DEL00006321 | chr1 | 101,584,026 | 101,586,406 | 2,380   | Loss |
| DEL00006327 | chr1 | 101,703,774 | 101,705,450 | 1,676   | Loss |
| DEL00006329 | chr1 | 101,741,079 | 101,743,498 | 2,419   | Loss |
| DEL00006333 | chr1 | 102,173,155 | 102,173,367 | 212     | Loss |
| DEL00006334 | chr1 | 102,203,835 | 102,659,666 | 455,831 | Loss |
| DEL00006360 | chr1 | 102,697,604 | 102,698,107 | 503     | Loss |
| DEL00006364 | chr1 | 102,723,677 | 102,723,806 | 129     | Loss |
| DEL00006365 | chr1 | 102,774,612 | 102,774,839 | 227     | Loss |
| DEL00006371 | chr1 | 102,818,954 | 102,819,750 | 796     | Loss |
| DEL00006373 | chr1 | 102,832,537 | 102,832,990 | 453     | Loss |



|             |      |             |             |       |      |
|-------------|------|-------------|-------------|-------|------|
| DEL00006380 | chr1 | 102,952,900 | 102,953,313 | 413   | Loss |
| DEL00006385 | chr1 | 102,993,422 | 102,993,482 | 60    | Loss |
| DEL00006386 | chr1 | 103,011,042 | 103,011,216 | 174   | Loss |
| DEL00006391 | chr1 | 103,086,765 | 103,090,975 | 4,210 | Loss |
| DEL00006393 | chr1 | 103,110,400 | 103,113,532 | 3,132 | Loss |
| DEL00006394 | chr1 | 103,115,864 | 103,116,973 | 1,109 | Loss |
| DEL00006395 | chr1 | 103,130,573 | 103,135,541 | 4,968 | Loss |
| DEL00006396 | chr1 | 103,163,631 | 103,165,079 | 1,448 | Loss |
| DEL00006397 | chr1 | 103,182,624 | 103,182,748 | 124   | Loss |
| DEL00006398 | chr1 | 103,189,178 | 103,190,773 | 1,595 | Loss |
| DEL00006401 | chr1 | 103,230,596 | 103,230,793 | 197   | Loss |
| DEL00006402 | chr1 | 103,231,415 | 103,231,468 | 53    | Loss |
| DUP00006405 | chr1 | 103,319,583 | 103,319,716 | 133   | Gain |
| DEL00006406 | chr1 | 103,339,257 | 103,340,192 | 935   | Loss |
| DEL00006407 | chr1 | 103,358,139 | 103,364,223 | 6,084 | Loss |
| DEL00006410 | chr1 | 103,372,633 | 103,372,892 | 259   | Loss |
| DEL00006414 | chr1 | 103,478,187 | 103,478,264 | 77    | Loss |
| DEL00006415 | chr1 | 103,480,711 | 103,481,425 | 714   | Loss |
| DEL00006417 | chr1 | 103,747,869 | 103,748,598 | 729   | Loss |
| DEL00006422 | chr1 | 103,911,994 | 103,912,049 | 55    | Loss |
| DEL00006425 | chr1 | 104,025,755 | 104,025,822 | 67    | Loss |
| DEL00006432 | chr1 | 104,175,992 | 104,176,556 | 564   | Loss |
| DEL00006434 | chr1 | 104,206,530 | 104,206,640 | 110   | Loss |
| DEL00006443 | chr1 | 104,391,160 | 104,391,959 | 799   | Loss |
| DEL00006449 | chr1 | 104,471,885 | 104,473,339 | 1,454 | Loss |
| DEL00006450 | chr1 | 104,473,660 | 104,473,775 | 115   | Loss |
| DEL00006451 | chr1 | 104,484,060 | 104,484,114 | 54    | Loss |
| DEL00006453 | chr1 | 104,497,482 | 104,497,894 | 412   | Loss |
| DEL00006457 | chr1 | 104,535,644 | 104,535,941 | 297   | Loss |
| DEL00006460 | chr1 | 104,606,708 | 104,606,778 | 70    | Loss |
| DEL00006465 | chr1 | 104,661,014 | 104,661,238 | 224   | Loss |
| DEL00006467 | chr1 | 104,721,306 | 104,721,665 | 359   | Loss |
| DEL00006469 | chr1 | 104,783,359 | 104,783,613 | 254   | Loss |
| DEL00006486 | chr1 | 105,065,036 | 105,065,150 | 114   | Loss |
| DEL00006492 | chr1 | 105,097,761 | 105,097,817 | 56    | Loss |
| DEL00006497 | chr1 | 105,113,823 | 105,113,907 | 84    | Loss |
| DEL00006499 | chr1 | 105,192,514 | 105,192,571 | 57    | Loss |
| DEL00006502 | chr1 | 105,219,642 | 105,219,906 | 264   | Loss |
| DEL00006504 | chr1 | 105,236,738 | 105,236,897 | 159   | Loss |
| DEL00006506 | chr1 | 105,350,500 | 105,350,997 | 497   | Loss |
| DEL00006508 | chr1 | 105,351,317 | 105,352,054 | 737   | Loss |
| DEL00006509 | chr1 | 105,368,184 | 105,368,695 | 511   | Loss |
| DEL00006511 | chr1 | 105,384,827 | 105,384,927 | 100   | Loss |
| DEL00006517 | chr1 | 105,463,942 | 105,464,152 | 210   | Loss |
| DEL00006523 | chr1 | 105,540,801 | 105,541,823 | 1,022 | Loss |
| DEL00006526 | chr1 | 105,618,683 | 105,618,746 | 63    | Loss |
| DEL00006535 | chr1 | 105,731,041 | 105,731,347 | 306   | Loss |
| DEL00006536 | chr1 | 105,752,534 | 105,752,667 | 133   | Loss |
| DEL00006537 | chr1 | 105,772,362 | 105,772,507 | 145   | Loss |

|             |      |             |             |       |      |
|-------------|------|-------------|-------------|-------|------|
| DEL00006541 | chr1 | 105,834,921 | 105,835,087 | 166   | Loss |
| DEL00006545 | chr1 | 105,879,106 | 105,879,339 | 233   | Loss |
| DEL00006547 | chr1 | 105,941,047 | 105,941,177 | 130   | Loss |
| DEL00006548 | chr1 | 105,945,297 | 105,945,412 | 115   | Loss |
| DEL00006550 | chr1 | 106,018,263 | 106,018,811 | 548   | Loss |
| DEL00006561 | chr1 | 106,199,782 | 106,200,071 | 289   | Loss |
| DEL00006563 | chr1 | 106,215,693 | 106,215,882 | 189   | Loss |
| DEL00006570 | chr1 | 106,349,000 | 106,349,097 | 97    | Loss |
| DEL00006578 | chr1 | 106,569,583 | 106,570,418 | 835   | Loss |
| DEL00006579 | chr1 | 106,573,670 | 106,573,749 | 79    | Loss |
| DEL00006580 | chr1 | 106,594,226 | 106,594,305 | 79    | Loss |
| DEL00006585 | chr1 | 106,661,836 | 106,662,553 | 717   | Loss |
| DEL00006591 | chr1 | 106,756,570 | 106,756,727 | 157   | Loss |
| DEL00006592 | chr1 | 106,762,536 | 106,762,699 | 163   | Loss |
| DEL00006595 | chr1 | 106,890,050 | 106,890,119 | 69    | Loss |
| DEL00006596 | chr1 | 106,898,060 | 106,898,533 | 473   | Loss |
| DEL00006599 | chr1 | 106,918,722 | 106,919,003 | 281   | Loss |
| DEL00006609 | chr1 | 107,182,552 | 107,183,113 | 561   | Loss |
| DEL00006610 | chr1 | 107,221,072 | 107,221,183 | 111   | Loss |
| DEL00006614 | chr1 | 107,294,494 | 107,294,616 | 122   | Loss |
| DEL00006618 | chr1 | 107,424,950 | 107,425,007 | 57    | Loss |
| DEL00006624 | chr1 | 107,486,434 | 107,489,312 | 2,878 | Loss |
| DEL00006642 | chr1 | 107,965,875 | 107,966,479 | 604   | Loss |
| DUP00006645 | chr1 | 108,004,938 | 108,005,005 | 67    | Gain |
| DEL00006646 | chr1 | 108,012,113 | 108,012,226 | 113   | Loss |
| DEL00006650 | chr1 | 108,086,245 | 108,086,297 | 52    | Loss |
| DEL00006653 | chr1 | 108,163,899 | 108,163,974 | 75    | Loss |
| DEL00006656 | chr1 | 108,224,591 | 108,224,645 | 54    | Loss |
| DEL00006662 | chr1 | 108,270,000 | 108,270,057 | 57    | Loss |
| DEL00006664 | chr1 | 108,296,585 | 108,296,695 | 110   | Loss |
| DEL00006673 | chr1 | 108,537,358 | 108,537,566 | 208   | Loss |
| DEL00006674 | chr1 | 108,555,289 | 108,555,485 | 196   | Loss |
| DEL00006675 | chr1 | 108,560,419 | 108,560,533 | 114   | Loss |
| DEL00006676 | chr1 | 108,574,581 | 108,574,870 | 289   | Loss |
| DEL00006688 | chr1 | 108,924,138 | 108,924,210 | 72    | Loss |
| DEL00006690 | chr1 | 108,994,896 | 108,996,280 | 1,384 | Loss |
| DEL00006704 | chr1 | 109,350,398 | 109,350,728 | 330   | Loss |
| DEL00006705 | chr1 | 109,369,263 | 109,369,316 | 53    | Loss |
| DUP00006707 | chr1 | 109,376,041 | 109,376,229 | 188   | Gain |
| DEL00006708 | chr1 | 109,376,851 | 109,376,927 | 76    | Loss |
| DEL00006709 | chr1 | 109,380,161 | 109,380,637 | 476   | Loss |
| DEL00006710 | chr1 | 109,437,857 | 109,438,064 | 207   | Loss |
| DEL00006711 | chr1 | 109,447,753 | 109,447,809 | 56    | Loss |
| DEL00006725 | chr1 | 109,862,553 | 109,863,848 | 1,295 | Loss |
| DEL00006727 | chr1 | 109,941,409 | 109,941,506 | 97    | Loss |
| DEL00006728 | chr1 | 109,973,668 | 109,978,144 | 4,476 | Loss |
| DEL00006733 | chr1 | 110,107,564 | 110,108,252 | 688   | Loss |
| DEL00006734 | chr1 | 110,109,956 | 110,110,996 | 1,040 | Loss |
| DEL00006738 | chr1 | 110,232,105 | 110,232,590 | 485   | Loss |

|             |      |             |             |       |      |
|-------------|------|-------------|-------------|-------|------|
| DEL00006740 | chr1 | 110,273,192 | 110,273,740 | 548   | Loss |
| DUP00006784 | chr1 | 110,337,896 | 110,338,433 | 537   | Gain |
| DEL00006809 | chr1 | 110,483,063 | 110,483,152 | 89    | Loss |
| DEL00006811 | chr1 | 110,506,389 | 110,506,811 | 422   | Loss |
| DUP00006813 | chr1 | 110,510,087 | 110,510,168 | 81    | Gain |
| DEL00006821 | chr1 | 110,746,275 | 110,746,328 | 53    | Loss |
| DEL00006832 | chr1 | 111,051,977 | 111,052,075 | 98    | Loss |
| DEL00006833 | chr1 | 111,073,443 | 111,073,643 | 200   | Loss |
| DEL00006834 | chr1 | 111,079,613 | 111,079,848 | 235   | Loss |
| DEL00006835 | chr1 | 111,083,093 | 111,083,215 | 122   | Loss |
| DEL00006842 | chr1 | 111,159,922 | 111,160,014 | 92    | Loss |
| DEL00006846 | chr1 | 111,300,520 | 111,300,591 | 71    | Loss |
| DEL00006847 | chr1 | 111,300,820 | 111,300,878 | 58    | Loss |
| DEL00006848 | chr1 | 111,328,791 | 111,329,222 | 431   | Loss |
| DEL00006851 | chr1 | 111,354,099 | 111,354,237 | 138   | Loss |
| DEL00006858 | chr1 | 111,468,233 | 111,468,315 | 82    | Loss |
| DEL00006859 | chr1 | 111,469,287 | 111,469,497 | 210   | Loss |
| DEL00006862 | chr1 | 111,538,498 | 111,538,673 | 175   | Loss |
| DEL00006865 | chr1 | 111,568,367 | 111,568,418 | 51    | Loss |
| DEL00006867 | chr1 | 111,625,174 | 111,625,236 | 62    | Loss |
| DEL00006868 | chr1 | 111,745,771 | 111,745,850 | 79    | Loss |
| DEL00006873 | chr1 | 111,952,851 | 111,953,198 | 347   | Loss |
| DEL00006880 | chr1 | 112,086,681 | 112,086,860 | 179   | Loss |
| DEL00006889 | chr1 | 112,235,347 | 112,236,179 | 832   | Loss |
| DEL00006890 | chr1 | 112,272,516 | 112,272,581 | 65    | Loss |
| DEL00006893 | chr1 | 112,290,509 | 112,290,774 | 265   | Loss |
| DEL00006895 | chr1 | 112,387,601 | 112,387,939 | 338   | Loss |
| DEL00006897 | chr1 | 112,406,916 | 112,406,972 | 56    | Loss |
| DEL00006902 | chr1 | 112,510,901 | 112,511,714 | 813   | Loss |
| DEL00006904 | chr1 | 112,558,859 | 112,559,492 | 633   | Loss |
| DEL00006909 | chr1 | 112,616,987 | 112,617,415 | 428   | Loss |
| DEL00006912 | chr1 | 112,743,672 | 112,743,767 | 95    | Loss |
| DEL00006913 | chr1 | 112,761,854 | 112,761,988 | 134   | Loss |
| DEL00006923 | chr1 | 112,908,598 | 112,908,680 | 82    | Loss |
| DEL00006924 | chr1 | 112,912,459 | 112,912,525 | 66    | Loss |
| DEL00006925 | chr1 | 112,923,168 | 112,923,238 | 70    | Loss |
| DEL00006926 | chr1 | 112,929,260 | 112,929,983 | 723   | Loss |
| DEL00006930 | chr1 | 112,962,466 | 112,962,577 | 111   | Loss |
| DEL00006931 | chr1 | 113,008,431 | 113,008,706 | 275   | Loss |
| DEL00006933 | chr1 | 113,023,741 | 113,025,175 | 1,434 | Loss |
| DUP00006937 | chr1 | 113,043,248 | 113,043,309 | 61    | Gain |
| DEL00006941 | chr1 | 113,278,940 | 113,279,463 | 523   | Loss |
| DEL00006943 | chr1 | 113,324,907 | 113,325,727 | 820   | Loss |
| DEL00006947 | chr1 | 113,354,556 | 113,354,712 | 156   | Loss |
| DUP00006950 | chr1 | 113,370,101 | 113,370,176 | 75    | Gain |
| DEL00006953 | chr1 | 113,410,601 | 113,410,878 | 277   | Loss |
| DEL00006954 | chr1 | 113,418,212 | 113,422,846 | 4,634 | Loss |
| DEL00006971 | chr1 | 113,720,233 | 113,722,201 | 1,968 | Loss |
| DEL00006974 | chr1 | 113,723,407 | 113,723,609 | 202   | Loss |

|             |      |             |             |       |      |
|-------------|------|-------------|-------------|-------|------|
| DEL00006978 | chr1 | 113,813,682 | 113,813,773 | 91    | Loss |
| DEL00006982 | chr1 | 113,951,879 | 113,951,961 | 82    | Loss |
| DEL00006986 | chr1 | 114,016,604 | 114,017,008 | 404   | Loss |
| DEL00006988 | chr1 | 114,059,791 | 114,059,910 | 119   | Loss |
| DEL00006995 | chr1 | 114,181,799 | 114,181,867 | 68    | Loss |
| DEL00006999 | chr1 | 114,232,479 | 114,232,632 | 153   | Loss |
| DEL00007001 | chr1 | 114,280,420 | 114,280,526 | 106   | Loss |
| DEL00007002 | chr1 | 114,295,583 | 114,295,819 | 236   | Loss |
| DEL00007014 | chr1 | 114,509,769 | 114,509,863 | 94    | Loss |
| DEL00007016 | chr1 | 114,578,575 | 114,579,051 | 476   | Loss |
| DEL00007019 | chr1 | 114,635,229 | 114,635,300 | 71    | Loss |
| DEL00007020 | chr1 | 114,646,532 | 114,646,795 | 263   | Loss |
| DEL00007025 | chr1 | 114,727,851 | 114,728,899 | 1,048 | Loss |
| DEL00007026 | chr1 | 114,732,047 | 114,732,127 | 80    | Loss |
| DEL00007029 | chr1 | 114,744,308 | 114,744,449 | 141   | Loss |
| DEL00007033 | chr1 | 114,771,291 | 114,771,939 | 648   | Loss |
| DEL00007042 | chr1 | 115,049,588 | 115,049,668 | 80    | Loss |
| DEL00007043 | chr1 | 115,063,103 | 115,063,162 | 59    | Loss |
| DEL00007052 | chr1 | 115,154,784 | 115,154,882 | 98    | Loss |
| DEL00007061 | chr1 | 115,286,133 | 115,286,205 | 72    | Loss |
| DEL00007062 | chr1 | 115,286,821 | 115,287,340 | 519   | Loss |
| DEL00007076 | chr1 | 115,426,886 | 115,427,443 | 557   | Loss |
| DEL00007078 | chr1 | 115,437,033 | 115,437,098 | 65    | Loss |
| DEL00007079 | chr1 | 115,456,157 | 115,456,558 | 401   | Loss |
| DUP00007080 | chr1 | 115,473,889 | 115,473,958 | 69    | Gain |
| DEL00007081 | chr1 | 115,479,352 | 115,480,036 | 684   | Loss |
| DEL00007085 | chr1 | 115,558,125 | 115,558,321 | 196   | Loss |
| DEL00007087 | chr1 | 115,575,573 | 115,575,689 | 116   | Loss |
| DEL00007089 | chr1 | 115,653,028 | 115,653,448 | 420   | Loss |
| DEL00007096 | chr1 | 115,782,643 | 115,783,279 | 636   | Loss |
| DEL00007099 | chr1 | 115,793,106 | 115,794,216 | 1,110 | Loss |
| DEL00007106 | chr1 | 115,876,460 | 115,876,740 | 280   | Loss |
| DEL00007109 | chr1 | 115,964,814 | 115,965,460 | 646   | Loss |
| DEL00007110 | chr1 | 115,965,986 | 115,966,048 | 62    | Loss |
| DEL00007115 | chr1 | 116,027,704 | 116,028,195 | 491   | Loss |
| DEL00007119 | chr1 | 116,062,838 | 116,062,905 | 67    | Loss |
| DEL00007124 | chr1 | 116,130,303 | 116,130,888 | 585   | Loss |
| DEL00007133 | chr1 | 116,250,356 | 116,251,166 | 810   | Loss |
| DUP00007134 | chr1 | 116,256,740 | 116,256,990 | 250   | Gain |
| DEL00007142 | chr1 | 116,380,226 | 116,380,350 | 124   | Loss |
| DEL00007143 | chr1 | 116,405,527 | 116,406,566 | 1,039 | Loss |
| DEL00007148 | chr1 | 116,519,318 | 116,519,396 | 78    | Loss |
| DEL00007157 | chr1 | 116,619,254 | 116,619,615 | 361   | Loss |
| DEL00007158 | chr1 | 116,626,647 | 116,626,817 | 170   | Loss |
| DEL00007159 | chr1 | 116,627,622 | 116,627,673 | 51    | Loss |
| DEL00007160 | chr1 | 116,684,466 | 116,687,331 | 2,865 | Loss |
| DEL00007163 | chr1 | 116,695,886 | 116,695,939 | 53    | Loss |
| DEL00007192 | chr1 | 117,300,307 | 117,300,890 | 583   | Loss |
| DEL00007193 | chr1 | 117,307,128 | 117,307,287 | 159   | Loss |

|             |      |             |             |        |       |
|-------------|------|-------------|-------------|--------|-------|
| DEL00007195 | chr1 | 117,439,665 | 117,439,730 | 65     | Loss  |
| DEL00007200 | chr1 | 117,632,967 | 117,634,042 | 1,075  | Loss  |
| DEL00007204 | chr1 | 117,773,692 | 117,774,399 | 707    | Loss  |
| DEL00007207 | chr1 | 117,818,026 | 117,827,840 | 9,814  | Loss  |
| DEL00007211 | chr1 | 117,907,521 | 117,908,529 | 1,008  | Loss  |
| DEL00007215 | chr1 | 117,927,562 | 117,930,543 | 2,981  | Loss  |
| DEL00007219 | chr1 | 118,010,835 | 118,011,527 | 692    | Loss  |
| DEL00007220 | chr1 | 118,031,900 | 118,031,964 | 64     | Loss  |
| DEL00007221 | chr1 | 118,048,886 | 118,049,804 | 918    | Loss  |
| DEL00007222 | chr1 | 118,062,275 | 118,063,732 | 1,457  | Loss  |
| DEL00007225 | chr1 | 118,118,379 | 118,118,631 | 252    | Loss  |
| DEL00007236 | chr1 | 118,343,361 | 118,344,283 | 922    | Loss  |
| DEL00007238 | chr1 | 118,373,196 | 118,374,447 | 1,251  | Loss  |
| DEL00007241 | chr1 | 118,417,191 | 118,433,800 | 16,609 | Loss  |
| DEL00007242 | chr1 | 118,465,307 | 118,465,368 | 61     | Loss  |
| DEL00007244 | chr1 | 118,539,385 | 118,539,942 | 557    | Loss  |
| DUP00007248 | chr1 | 118,575,919 | 118,578,742 | 2,823  | Mixed |
| DEL00007252 | chr1 | 118,606,582 | 118,606,816 | 234    | Loss  |
| DEL00007253 | chr1 | 118,718,417 | 118,718,519 | 102    | Loss  |
| DUP00007255 | chr1 | 118,739,526 | 118,739,606 | 80     | Gain  |
| DEL00007261 | chr1 | 118,930,717 | 118,930,862 | 145    | Loss  |
| DEL00007262 | chr1 | 118,950,288 | 118,950,728 | 440    | Loss  |
| DEL00007268 | chr1 | 119,129,849 | 119,130,096 | 247    | Loss  |
| DEL00007269 | chr1 | 119,170,062 | 119,170,155 | 93     | Loss  |
| DEL00007271 | chr1 | 119,174,731 | 119,175,128 | 397    | Loss  |
| DEL00007274 | chr1 | 119,219,227 | 119,219,791 | 564    | Loss  |
| DEL00007280 | chr1 | 119,262,112 | 119,262,338 | 226    | Loss  |
| DEL00007281 | chr1 | 119,270,184 | 119,270,287 | 103    | Loss  |
| DEL00007282 | chr1 | 119,278,050 | 119,280,930 | 2,880  | Loss  |
| DEL00007284 | chr1 | 119,290,522 | 119,294,086 | 3,564  | Loss  |
| DEL00007289 | chr1 | 119,306,450 | 119,307,018 | 568    | Loss  |
| DEL00007299 | chr1 | 119,481,596 | 119,481,653 | 57     | Loss  |
| DEL00007302 | chr1 | 119,601,548 | 119,602,009 | 461    | Loss  |
| DEL00007303 | chr1 | 119,605,988 | 119,606,367 | 379    | Loss  |
| DEL00007304 | chr1 | 119,609,204 | 119,609,299 | 95     | Loss  |
| DEL00007306 | chr1 | 119,643,147 | 119,643,556 | 409    | Loss  |
| DEL00007309 | chr1 | 119,912,544 | 119,912,785 | 241    | Loss  |
| DUP00007314 | chr1 | 120,046,530 | 120,046,595 | 65     | Gain  |
| DEL00007315 | chr1 | 120,086,763 | 120,086,922 | 159    | Loss  |
| DEL00007318 | chr1 | 120,223,456 | 120,223,511 | 55     | Loss  |
| DEL00007320 | chr1 | 120,243,980 | 120,244,084 | 104    | Loss  |
| DEL00007322 | chr1 | 120,256,697 | 120,257,013 | 316    | Loss  |
| DEL00007328 | chr1 | 120,515,291 | 120,516,213 | 922    | Loss  |
| DEL00007329 | chr1 | 120,521,745 | 120,522,818 | 1,073  | Loss  |
| DEL00007332 | chr1 | 120,552,303 | 120,552,542 | 239    | Loss  |
| DEL00007339 | chr1 | 120,768,635 | 120,768,969 | 334    | Loss  |
| DEL00007350 | chr1 | 120,909,403 | 120,909,462 | 59     | Loss  |
| DEL00007351 | chr1 | 120,942,201 | 120,942,330 | 129    | Loss  |
| DEL00007361 | chr1 | 121,006,848 | 121,007,440 | 592    | Loss  |

|             |      |             |             |       |      |
|-------------|------|-------------|-------------|-------|------|
| DEL00007368 | chr1 | 121,068,146 | 121,068,201 | 55    | Loss |
| DEL00007369 | chr1 | 121,129,171 | 121,129,228 | 57    | Loss |
| DEL00007373 | chr1 | 121,166,480 | 121,166,877 | 397   | Loss |
| DEL00007378 | chr1 | 121,194,944 | 121,195,144 | 200   | Loss |
| DEL00007380 | chr1 | 121,232,109 | 121,232,749 | 640   | Loss |
| DEL00007385 | chr1 | 121,275,147 | 121,275,318 | 171   | Loss |
| DEL00007387 | chr1 | 121,307,022 | 121,307,169 | 147   | Loss |
| DEL00007389 | chr1 | 121,328,593 | 121,330,821 | 2,228 | Loss |
| DEL00007391 | chr1 | 121,373,835 | 121,374,142 | 307   | Loss |
| DEL00007400 | chr1 | 121,501,998 | 121,503,543 | 1,545 | Loss |
| DEL00007402 | chr1 | 121,538,344 | 121,538,724 | 380   | Loss |
| DEL00007403 | chr1 | 121,560,841 | 121,560,896 | 55    | Loss |
| DEL00007407 | chr1 | 121,671,391 | 121,671,450 | 59    | Loss |
| DEL00007418 | chr1 | 121,795,712 | 121,795,800 | 88    | Loss |
| DEL00007431 | chr1 | 121,832,640 | 121,832,764 | 124   | Loss |
| DEL00007432 | chr1 | 121,835,033 | 121,835,323 | 290   | Loss |
| DEL00007439 | chr1 | 121,924,150 | 121,924,326 | 176   | Loss |
| DEL00007446 | chr1 | 122,071,568 | 122,071,663 | 95    | Loss |
| DEL00007448 | chr1 | 122,195,120 | 122,195,210 | 90    | Loss |
| DEL00007449 | chr1 | 122,282,983 | 122,284,284 | 1,301 | Loss |
| DEL00007459 | chr1 | 122,381,240 | 122,382,464 | 1,224 | Loss |
| DEL00007463 | chr1 | 122,407,367 | 122,407,829 | 462   | Loss |
| DEL00007465 | chr1 | 122,456,459 | 122,456,567 | 108   | Loss |
| DEL00007483 | chr1 | 122,608,501 | 122,608,576 | 75    | Loss |
| DEL00007491 | chr1 | 122,830,243 | 122,830,303 | 60    | Loss |
| DEL00007493 | chr1 | 122,857,515 | 122,858,217 | 702   | Loss |
| DEL00007495 | chr1 | 122,896,044 | 122,896,659 | 615   | Loss |
| DEL00007505 | chr1 | 123,111,409 | 123,111,887 | 478   | Loss |
| DEL00007507 | chr1 | 123,114,624 | 123,115,993 | 1,369 | Loss |
| DEL00007516 | chr1 | 123,335,740 | 123,337,853 | 2,113 | Loss |
| DEL00007521 | chr1 | 123,472,611 | 123,473,018 | 407   | Loss |
| DEL00007525 | chr1 | 123,533,594 | 123,534,481 | 887   | Loss |
| DEL00007535 | chr1 | 123,692,933 | 123,692,992 | 59    | Loss |
| DEL00007537 | chr1 | 123,746,620 | 123,746,704 | 84    | Loss |
| DEL00007538 | chr1 | 123,805,543 | 123,805,731 | 188   | Loss |
| DEL00007551 | chr1 | 123,982,664 | 123,982,744 | 80    | Loss |
| DEL00007554 | chr1 | 124,018,085 | 124,018,163 | 78    | Loss |
| DEL00007555 | chr1 | 124,026,756 | 124,026,818 | 62    | Loss |
| DEL00007560 | chr1 | 124,117,270 | 124,117,323 | 53    | Loss |
| DEL00007562 | chr1 | 124,156,459 | 124,156,653 | 194   | Loss |
| DEL00007570 | chr1 | 124,338,740 | 124,339,029 | 289   | Loss |
| DEL00007575 | chr1 | 124,399,591 | 124,399,722 | 131   | Loss |
| DEL00007587 | chr1 | 124,507,813 | 124,507,918 | 105   | Loss |
| DEL00007589 | chr1 | 124,517,738 | 124,518,044 | 306   | Loss |
| DEL00007592 | chr1 | 124,572,748 | 124,572,896 | 148   | Loss |
| DEL00007596 | chr1 | 124,636,172 | 124,636,922 | 750   | Loss |
| DEL00007598 | chr1 | 124,660,083 | 124,660,310 | 227   | Loss |
| DEL00007599 | chr1 | 124,669,710 | 124,670,605 | 895   | Loss |
| DEL00007604 | chr1 | 124,712,372 | 124,712,441 | 69    | Loss |

|             |      |             |             |        |       |
|-------------|------|-------------|-------------|--------|-------|
| DEL00007606 | chr1 | 124,742,515 | 124,742,729 | 214    | Loss  |
| DEL00007607 | chr1 | 124,762,735 | 124,762,803 | 68     | Loss  |
| DEL00007609 | chr1 | 124,830,709 | 124,831,345 | 636    | Loss  |
| DEL00007616 | chr1 | 124,912,305 | 124,912,364 | 59     | Loss  |
| DEL00007617 | chr1 | 124,924,032 | 124,924,202 | 170    | Loss  |
| DEL00007618 | chr1 | 124,929,071 | 124,929,772 | 701    | Loss  |
| DEL00007633 | chr1 | 125,144,916 | 125,145,130 | 214    | Loss  |
| DEL00007637 | chr1 | 125,175,887 | 125,175,983 | 96     | Loss  |
| DEL00007652 | chr1 | 125,290,190 | 125,304,627 | 14,437 | Loss  |
| DEL00007656 | chr1 | 125,359,500 | 125,359,953 | 453    | Loss  |
| DEL00007660 | chr1 | 125,493,877 | 125,494,016 | 139    | Loss  |
| DEL00007662 | chr1 | 125,515,599 | 125,515,655 | 56     | Loss  |
| DEL00007667 | chr1 | 125,640,452 | 125,640,605 | 153    | Loss  |
| DEL00007668 | chr1 | 125,643,114 | 125,643,193 | 79     | Loss  |
| DEL00007669 | chr1 | 125,643,309 | 125,645,941 | 2,632  | Loss  |
| DEL00007673 | chr1 | 125,703,011 | 125,703,337 | 326    | Loss  |
| DEL00007674 | chr1 | 125,761,995 | 125,762,115 | 120    | Loss  |
| DEL00007689 | chr1 | 126,179,315 | 126,179,594 | 279    | Loss  |
| DEL00007690 | chr1 | 126,271,210 | 126,271,271 | 61     | Loss  |
| DEL00007695 | chr1 | 126,376,189 | 126,376,242 | 53     | Loss  |
| DEL00007696 | chr1 | 126,424,195 | 126,424,293 | 98     | Loss  |
| DEL00007697 | chr1 | 126,456,604 | 126,457,794 | 1,190  | Loss  |
| DEL00007698 | chr1 | 126,462,806 | 126,462,913 | 107    | Loss  |
| DEL00007702 | chr1 | 126,571,788 | 126,572,348 | 560    | Loss  |
| DEL00007710 | chr1 | 126,706,693 | 126,706,753 | 60     | Loss  |
| DEL00007712 | chr1 | 126,740,489 | 126,740,686 | 197    | Loss  |
| DEL00007713 | chr1 | 126,741,120 | 126,741,627 | 507    | Loss  |
| DEL00007715 | chr1 | 126,745,803 | 126,746,117 | 314    | Loss  |
| DEL00007716 | chr1 | 126,800,332 | 126,800,393 | 61     | Loss  |
| DUP00007717 | chr1 | 126,871,008 | 126,877,224 | 6,216  | Mixed |
| DEL00007720 | chr1 | 126,897,508 | 126,898,722 | 1,214  | Loss  |
| DEL00007721 | chr1 | 126,901,112 | 126,901,216 | 104    | Loss  |
| DEL00007724 | chr1 | 126,968,189 | 126,968,243 | 54     | Loss  |
| DEL00007727 | chr1 | 127,049,935 | 127,050,751 | 816    | Loss  |
| DEL00007732 | chr1 | 127,139,210 | 127,140,864 | 1,654  | Loss  |
| DEL00007734 | chr1 | 127,208,232 | 127,208,307 | 75     | Loss  |
| DEL00007735 | chr1 | 127,269,014 | 127,269,066 | 52     | Loss  |
| DEL00007736 | chr1 | 127,303,028 | 127,304,091 | 1,063  | Loss  |
| DEL00007738 | chr1 | 127,553,181 | 127,553,992 | 811    | Loss  |
| DEL00007740 | chr1 | 127,601,519 | 127,601,579 | 60     | Loss  |
| DUP00007741 | chr1 | 127,613,374 | 127,613,513 | 139    | Gain  |
| DEL00007742 | chr1 | 127,613,671 | 127,615,134 | 1,463  | Loss  |
| DEL00007744 | chr1 | 127,665,421 | 127,666,022 | 601    | Loss  |
| DEL00007745 | chr1 | 127,688,626 | 127,688,718 | 92     | Loss  |
| DEL00007747 | chr1 | 127,735,867 | 127,736,734 | 867    | Loss  |
| DEL00007749 | chr1 | 127,772,228 | 127,772,293 | 65     | Loss  |
| DEL00007758 | chr1 | 128,159,031 | 128,162,191 | 3,160  | Loss  |
| DEL00007759 | chr1 | 128,195,185 | 128,195,243 | 58     | Loss  |
| DEL00007763 | chr1 | 128,267,072 | 128,268,133 | 1,061  | Loss  |

|             |      |             |             |       |      |
|-------------|------|-------------|-------------|-------|------|
| DEL00007765 | chr1 | 128,357,781 | 128,358,098 | 317   | Loss |
| DEL00007767 | chr1 | 128,414,975 | 128,415,278 | 303   | Loss |
| DEL00007768 | chr1 | 128,415,542 | 128,415,605 | 63    | Loss |
| DEL00007770 | chr1 | 128,467,668 | 128,468,865 | 1,197 | Loss |
| DEL00007778 | chr1 | 128,675,796 | 128,675,939 | 143   | Loss |
| DEL00007780 | chr1 | 128,718,807 | 128,720,125 | 1,318 | Loss |
| DEL00007781 | chr1 | 128,747,103 | 128,747,175 | 72    | Loss |
| DEL00007782 | chr1 | 128,750,398 | 128,756,723 | 6,325 | Loss |
| DEL00007784 | chr1 | 128,775,955 | 128,777,566 | 1,611 | Loss |
| DEL00007792 | chr1 | 128,877,287 | 128,878,094 | 807   | Loss |
| DEL00007794 | chr1 | 128,910,066 | 128,910,269 | 203   | Loss |
| DEL00007803 | chr1 | 129,344,618 | 129,345,097 | 479   | Loss |
| DUP00007805 | chr1 | 129,347,079 | 129,347,216 | 137   | Gain |
| DEL00007806 | chr1 | 129,377,215 | 129,377,287 | 72    | Loss |
| DEL00007808 | chr1 | 129,412,332 | 129,413,119 | 787   | Loss |
| DEL00007810 | chr1 | 129,419,999 | 129,421,196 | 1,197 | Loss |
| DEL00007815 | chr1 | 129,500,884 | 129,500,952 | 68    | Loss |
| DEL00007821 | chr1 | 129,708,813 | 129,716,886 | 8,073 | Loss |
| DEL00007822 | chr1 | 129,720,442 | 129,720,520 | 78    | Loss |
| DEL00007823 | chr1 | 129,732,604 | 129,733,728 | 1,124 | Loss |
| DUP00007829 | chr1 | 129,849,095 | 129,849,186 | 91    | Gain |
| DEL00007835 | chr1 | 129,984,650 | 129,984,724 | 74    | Loss |
| DEL00007837 | chr1 | 130,098,220 | 130,098,281 | 61    | Loss |
| DEL00007838 | chr1 | 130,103,277 | 130,103,852 | 575   | Loss |
| DEL00007841 | chr1 | 130,154,820 | 130,157,162 | 2,342 | Loss |
| DEL00007843 | chr1 | 130,179,113 | 130,179,192 | 79    | Loss |
| DEL00007848 | chr1 | 130,405,542 | 130,405,617 | 75    | Loss |
| DEL00007851 | chr1 | 130,497,905 | 130,498,112 | 207   | Loss |
| DEL00007855 | chr1 | 130,547,195 | 130,547,843 | 648   | Loss |
| DEL00007858 | chr1 | 130,761,689 | 130,761,791 | 102   | Loss |
| DEL00007859 | chr1 | 130,794,019 | 130,794,556 | 537   | Loss |
| DEL00007867 | chr1 | 130,900,252 | 130,900,346 | 94    | Loss |
| DEL00007868 | chr1 | 130,910,265 | 130,910,375 | 110   | Loss |
| DEL00007870 | chr1 | 131,003,666 | 131,004,261 | 595   | Loss |
| DEL00007874 | chr1 | 131,084,482 | 131,084,543 | 61    | Loss |
| DEL00007875 | chr1 | 131,085,117 | 131,085,175 | 58    | Loss |
| DEL00007878 | chr1 | 131,137,065 | 131,137,133 | 68    | Loss |
| DEL00007886 | chr1 | 131,199,387 | 131,199,588 | 201   | Loss |
| DEL00007889 | chr1 | 131,238,980 | 131,239,062 | 82    | Loss |
| DEL00007896 | chr1 | 131,354,941 | 131,355,031 | 90    | Loss |
| DEL00007897 | chr1 | 131,367,692 | 131,367,823 | 131   | Loss |
| DEL00007901 | chr1 | 131,593,470 | 131,593,581 | 111   | Loss |
| DEL00007902 | chr1 | 131,715,834 | 131,715,902 | 68    | Loss |
| DEL00007905 | chr1 | 131,754,244 | 131,754,384 | 140   | Loss |
| DEL00007907 | chr1 | 131,835,470 | 131,836,223 | 753   | Loss |
| DEL00007910 | chr1 | 131,905,634 | 131,906,714 | 1,080 | Loss |
| DEL00007914 | chr1 | 131,999,617 | 131,999,672 | 55    | Loss |
| DEL00007915 | chr1 | 132,003,847 | 132,003,906 | 59    | Loss |
| DEL00007917 | chr1 | 132,031,649 | 132,031,957 | 308   | Loss |



|             |      |             |             |       |      |
|-------------|------|-------------|-------------|-------|------|
| DEL00007919 | chr1 | 132,032,233 | 132,033,382 | 1,149 | Loss |
| DEL00007921 | chr1 | 132,061,144 | 132,061,266 | 122   | Loss |
| DEL00007922 | chr1 | 132,083,100 | 132,083,192 | 92    | Loss |
| DEL00007930 | chr1 | 132,210,905 | 132,211,690 | 785   | Loss |
| DUP00007932 | chr1 | 132,244,294 | 132,244,410 | 116   | Gain |
| DEL00007941 | chr1 | 132,430,386 | 132,430,454 | 68    | Loss |
| DEL00007944 | chr1 | 132,465,723 | 132,465,835 | 112   | Loss |
| DEL00007947 | chr1 | 132,483,689 | 132,483,759 | 70    | Loss |
| DEL00007951 | chr1 | 132,605,387 | 132,605,836 | 449   | Loss |
| DEL00007955 | chr1 | 132,678,780 | 132,680,081 | 1,301 | Loss |
| DEL00007958 | chr1 | 132,774,716 | 132,774,909 | 193   | Loss |
| DEL00007960 | chr1 | 132,819,550 | 132,819,794 | 244   | Loss |
| DEL00007965 | chr1 | 133,017,477 | 133,017,721 | 244   | Loss |
| DEL00007967 | chr1 | 133,074,225 | 133,074,737 | 512   | Loss |
| DEL00007970 | chr1 | 133,136,812 | 133,137,008 | 196   | Loss |
| DEL00007976 | chr1 | 133,505,494 | 133,505,597 | 103   | Loss |
| DEL00007988 | chr1 | 133,770,822 | 133,770,998 | 176   | Loss |
| DEL00007990 | chr1 | 133,789,622 | 133,790,186 | 564   | Loss |
| DEL00007992 | chr1 | 133,852,878 | 133,853,017 | 139   | Loss |
| DEL00007998 | chr1 | 134,003,345 | 134,003,429 | 84    | Loss |
| DEL00008000 | chr1 | 134,024,518 | 134,024,641 | 123   | Loss |
| DEL00008003 | chr1 | 134,051,406 | 134,051,731 | 325   | Loss |
| DEL00008010 | chr1 | 134,255,117 | 134,255,418 | 301   | Loss |
| DEL00008011 | chr1 | 134,262,611 | 134,263,034 | 423   | Loss |
| DEL00008013 | chr1 | 134,272,852 | 134,273,504 | 652   | Loss |
| DEL00008021 | chr1 | 134,383,066 | 134,383,767 | 701   | Loss |
| DEL00008029 | chr1 | 134,638,525 | 134,638,609 | 84    | Loss |
| DEL00008030 | chr1 | 134,640,608 | 134,640,848 | 240   | Loss |
| DUP00008037 | chr1 | 134,681,439 | 134,681,619 | 180   | Gain |
| DEL00008040 | chr1 | 134,698,267 | 134,698,649 | 382   | Loss |
| DEL00008043 | chr1 | 134,753,966 | 134,754,609 | 643   | Loss |
| DEL00008049 | chr1 | 134,885,597 | 134,886,049 | 452   | Loss |
| DEL00008054 | chr1 | 135,104,791 | 135,104,910 | 119   | Loss |
| DEL00008057 | chr1 | 135,226,541 | 135,226,632 | 91    | Loss |
| DEL00008061 | chr1 | 135,335,024 | 135,335,484 | 460   | Loss |
| DEL00008062 | chr1 | 135,337,077 | 135,337,159 | 82    | Loss |
| DEL00008063 | chr1 | 135,393,796 | 135,397,467 | 3,671 | Loss |
| DEL00008064 | chr1 | 135,398,373 | 135,398,825 | 452   | Loss |
| DEL00008068 | chr1 | 135,554,205 | 135,554,813 | 608   | Loss |
| DEL00008070 | chr1 | 135,571,607 | 135,571,713 | 106   | Loss |
| DEL00008072 | chr1 | 135,758,405 | 135,758,473 | 68    | Loss |
| DEL00008076 | chr1 | 135,879,968 | 135,880,020 | 52    | Loss |
| DEL00008080 | chr1 | 135,922,092 | 135,922,346 | 254   | Loss |
| DEL00008083 | chr1 | 135,950,433 | 135,950,815 | 382   | Loss |
| DEL00008086 | chr1 | 135,984,527 | 135,986,036 | 1,509 | Loss |
| DEL00008089 | chr1 | 136,034,284 | 136,034,724 | 440   | Loss |
| DEL00008092 | chr1 | 136,174,359 | 136,174,636 | 277   | Loss |
| DEL00008093 | chr1 | 136,190,296 | 136,190,387 | 91    | Loss |
| DEL00008095 | chr1 | 136,195,798 | 136,195,852 | 54    | Loss |

|             |      |             |             |        |      |
|-------------|------|-------------|-------------|--------|------|
| DEL00008096 | chr1 | 136,221,299 | 136,221,361 | 62     | Loss |
| DEL00008098 | chr1 | 136,232,633 | 136,232,712 | 79     | Loss |
| DEL00008100 | chr1 | 136,252,680 | 136,252,743 | 63     | Loss |
| DEL00008102 | chr1 | 136,259,013 | 136,259,311 | 298    | Loss |
| DEL00008103 | chr1 | 136,288,205 | 136,289,829 | 1,624  | Loss |
| DEL00008105 | chr1 | 136,374,558 | 136,374,747 | 189    | Loss |
| DEL00008108 | chr1 | 136,422,183 | 136,422,350 | 167    | Loss |
| DEL00008109 | chr1 | 136,448,196 | 136,449,347 | 1,151  | Loss |
| DEL00008114 | chr1 | 136,614,961 | 136,615,021 | 60     | Loss |
| DEL00008115 | chr1 | 136,629,284 | 136,632,170 | 2,886  | Loss |
| DEL00008118 | chr1 | 136,647,185 | 136,647,242 | 57     | Loss |
| DEL00008119 | chr1 | 136,653,577 | 136,655,119 | 1,542  | Loss |
| DEL00008120 | chr1 | 136,665,253 | 136,665,318 | 65     | Loss |
| DEL00008124 | chr1 | 136,707,293 | 136,707,382 | 89     | Loss |
| DEL00008128 | chr1 | 136,772,133 | 136,772,433 | 300    | Loss |
| DEL00008130 | chr1 | 136,790,965 | 136,793,712 | 2,747  | Loss |
| DEL00008141 | chr1 | 136,995,366 | 136,995,585 | 219    | Loss |
| DEL00008144 | chr1 | 137,088,901 | 137,089,078 | 177    | Loss |
| DEL00008157 | chr1 | 137,118,050 | 137,154,550 | 36,500 | Loss |
| DUP00008201 | chr1 | 137,165,248 | 137,225,027 | 59,779 | Gain |
| DEL00008241 | chr1 | 137,280,058 | 137,282,660 | 2,602  | Loss |
| DEL00008245 | chr1 | 137,362,657 | 137,362,766 | 109    | Loss |
| DEL00008249 | chr1 | 137,519,659 | 137,520,394 | 735    | Loss |
| DEL00008252 | chr1 | 137,649,832 | 137,650,057 | 225    | Loss |
| DEL00008254 | chr1 | 137,734,530 | 137,734,738 | 208    | Loss |
| DEL00008260 | chr1 | 137,847,154 | 137,848,299 | 1,145  | Loss |
| DEL00008263 | chr1 | 137,969,529 | 137,969,943 | 414    | Loss |
| DEL00008268 | chr1 | 137,999,496 | 137,999,590 | 94     | Loss |
| DEL00008270 | chr1 | 138,018,735 | 138,018,807 | 72     | Loss |
| DEL00008272 | chr1 | 138,078,027 | 138,078,739 | 712    | Loss |
| DEL00008275 | chr1 | 138,178,085 | 138,178,169 | 84     | Loss |
| DEL00008277 | chr1 | 138,203,199 | 138,203,484 | 285    | Loss |
| DEL00008281 | chr1 | 138,246,384 | 138,246,619 | 235    | Loss |
| DEL00008288 | chr1 | 138,454,046 | 138,454,189 | 143    | Loss |
| DEL00008292 | chr1 | 138,572,372 | 138,572,566 | 194    | Loss |
| DEL00008293 | chr1 | 138,633,182 | 138,633,269 | 87     | Loss |
| DEL00008304 | chr1 | 138,858,349 | 138,858,680 | 331    | Loss |
| DEL00008309 | chr1 | 138,940,537 | 138,940,785 | 248    | Loss |
| DEL00008310 | chr1 | 138,960,353 | 138,960,430 | 77     | Loss |
| DEL00008315 | chr1 | 139,016,454 | 139,017,804 | 1,350  | Loss |
| DEL00008317 | chr1 | 139,027,065 | 139,027,164 | 99     | Loss |
| DEL00008318 | chr1 | 139,027,593 | 139,028,403 | 810    | Loss |
| DEL00008327 | chr1 | 139,288,912 | 139,289,010 | 98     | Loss |
| DEL00008336 | chr1 | 139,462,808 | 139,463,957 | 1,149  | Loss |
| DEL00008340 | chr1 | 139,655,541 | 139,656,403 | 862    | Loss |
| DEL00008343 | chr1 | 139,725,673 | 139,725,745 | 72     | Loss |
| DEL00008347 | chr1 | 139,809,272 | 139,809,585 | 313    | Loss |
| DEL00008350 | chr1 | 139,877,370 | 139,877,515 | 145    | Loss |
| DEL00008353 | chr1 | 139,887,612 | 139,887,694 | 82     | Loss |

|             |      |             |             |       |      |
|-------------|------|-------------|-------------|-------|------|
| DEL00008355 | chr1 | 139,921,754 | 139,921,862 | 108   | Loss |
| DEL00008358 | chr1 | 139,995,184 | 139,995,373 | 189   | Loss |
| DEL00008359 | chr1 | 140,005,084 | 140,005,357 | 273   | Loss |
| DEL00008360 | chr1 | 140,011,227 | 140,011,465 | 238   | Loss |
| DEL00008377 | chr1 | 140,340,363 | 140,340,603 | 240   | Loss |
| DEL00008379 | chr1 | 140,407,058 | 140,407,605 | 547   | Loss |
| DEL00008381 | chr1 | 140,415,197 | 140,417,143 | 1,946 | Loss |
| DEL00008383 | chr1 | 140,423,215 | 140,423,536 | 321   | Loss |
| DEL00008385 | chr1 | 140,459,805 | 140,459,883 | 78    | Loss |
| DEL00008478 | chr1 | 141,288,062 | 141,288,347 | 285   | Loss |
| DEL00008479 | chr1 | 141,317,999 | 141,318,235 | 236   | Loss |
| DEL00008481 | chr1 | 141,390,635 | 141,391,753 | 1,118 | Loss |
| DEL00008483 | chr1 | 141,471,200 | 141,472,722 | 1,522 | Loss |
| DEL00008484 | chr1 | 141,514,369 | 141,514,700 | 331   | Loss |
| DEL00008485 | chr1 | 141,555,942 | 141,556,847 | 905   | Loss |
| DEL00008486 | chr1 | 141,571,327 | 141,571,458 | 131   | Loss |
| DEL00008489 | chr1 | 141,665,059 | 141,665,114 | 55    | Loss |
| DEL00008492 | chr1 | 141,688,357 | 141,688,431 | 74    | Loss |
| DEL00008494 | chr1 | 141,717,331 | 141,717,514 | 183   | Loss |
| DEL00008496 | chr1 | 141,730,966 | 141,732,027 | 1,061 | Loss |
| DEL00008500 | chr1 | 141,768,563 | 141,768,621 | 58    | Loss |
| DEL00008506 | chr1 | 141,831,102 | 141,831,153 | 51    | Loss |
| DEL00008510 | chr1 | 141,973,444 | 141,973,499 | 55    | Loss |
| DEL00008519 | chr1 | 142,252,072 | 142,253,266 | 1,194 | Loss |
| DEL00008520 | chr1 | 142,278,011 | 142,279,993 | 1,982 | Loss |
| DEL00008521 | chr1 | 142,297,747 | 142,298,300 | 553   | Loss |
| DEL00008524 | chr1 | 142,326,638 | 142,328,090 | 1,452 | Loss |
| DEL00008527 | chr1 | 142,339,135 | 142,340,055 | 920   | Loss |
| DEL00008528 | chr1 | 142,395,111 | 142,396,099 | 988   | Loss |
| DEL00008532 | chr1 | 142,438,911 | 142,440,023 | 1,112 | Loss |
| DEL00008537 | chr1 | 142,543,217 | 142,543,889 | 672   | Loss |
| DEL00008539 | chr1 | 142,563,932 | 142,564,178 | 246   | Loss |
| DUP00008543 | chr1 | 142,635,163 | 142,635,295 | 132   | Gain |
| DEL00008546 | chr1 | 142,669,682 | 142,670,093 | 411   | Loss |
| DEL00008551 | chr1 | 142,775,240 | 142,776,203 | 963   | Loss |
| DEL00008553 | chr1 | 142,777,409 | 142,777,515 | 106   | Loss |
| DEL00008583 | chr1 | 142,974,436 | 142,974,591 | 155   | Loss |
| DEL00008585 | chr1 | 143,040,242 | 143,040,304 | 62    | Loss |
| DEL00008590 | chr1 | 143,192,546 | 143,192,597 | 51    | Loss |
| DEL00008591 | chr1 | 143,198,175 | 143,198,784 | 609   | Loss |
| DEL00008597 | chr1 | 143,255,862 | 143,258,145 | 2,283 | Loss |
| DEL00008598 | chr1 | 143,313,336 | 143,314,975 | 1,639 | Loss |
| DEL00008599 | chr1 | 143,321,515 | 143,322,460 | 945   | Loss |
| DEL00008608 | chr1 | 143,442,752 | 143,443,706 | 954   | Loss |
| DEL00008611 | chr1 | 143,541,004 | 143,545,643 | 4,639 | Loss |
| DEL00008613 | chr1 | 143,592,669 | 143,594,839 | 2,170 | Loss |
| DEL00008619 | chr1 | 143,766,856 | 143,766,925 | 69    | Loss |
| DEL00008620 | chr1 | 143,807,500 | 143,807,726 | 226   | Loss |
| DEL00008621 | chr1 | 143,813,299 | 143,813,698 | 399   | Loss |

|             |      |             |             |       |      |
|-------------|------|-------------|-------------|-------|------|
| DEL00008629 | chr1 | 143,994,106 | 143,994,278 | 172   | Loss |
| DEL00008636 | chr1 | 144,092,313 | 144,092,729 | 416   | Loss |
| DEL00008638 | chr1 | 144,116,291 | 144,116,734 | 443   | Loss |
| DEL00008641 | chr1 | 144,134,178 | 144,134,231 | 53    | Loss |
| DEL00008642 | chr1 | 144,158,147 | 144,158,935 | 788   | Loss |
| DEL00008644 | chr1 | 144,231,527 | 144,231,611 | 84    | Loss |
| DEL00008650 | chr1 | 144,376,886 | 144,377,038 | 152   | Loss |
| DEL00008651 | chr1 | 144,389,655 | 144,390,053 | 398   | Loss |
| DEL00008655 | chr1 | 144,495,352 | 144,495,882 | 530   | Loss |
| DEL00008657 | chr1 | 144,496,223 | 144,496,413 | 190   | Loss |
| DEL00008660 | chr1 | 144,527,361 | 144,527,746 | 385   | Loss |
| DEL00008663 | chr1 | 144,574,218 | 144,574,360 | 142   | Loss |
| DEL00008664 | chr1 | 144,619,844 | 144,619,980 | 136   | Loss |
| DUP00008672 | chr1 | 144,890,019 | 144,890,123 | 104   | Gain |
| DEL00008675 | chr1 | 144,953,584 | 144,955,319 | 1,735 | Loss |
| DEL00008678 | chr1 | 145,021,895 | 145,021,953 | 58    | Loss |
| DEL00008680 | chr1 | 145,027,681 | 145,027,822 | 141   | Loss |
| DEL00008681 | chr1 | 145,033,436 | 145,033,576 | 140   | Loss |
| DEL00008683 | chr1 | 145,097,347 | 145,097,827 | 480   | Loss |
| DEL00008691 | chr1 | 145,259,016 | 145,259,297 | 281   | Loss |
| DEL00008696 | chr1 | 145,317,630 | 145,317,741 | 111   | Loss |
| DEL00008702 | chr1 | 145,497,486 | 145,497,681 | 195   | Loss |
| DEL00008710 | chr1 | 145,573,572 | 145,573,623 | 51    | Loss |
| DEL00008714 | chr1 | 145,656,259 | 145,656,535 | 276   | Loss |
| DEL00008718 | chr1 | 145,735,688 | 145,735,741 | 53    | Loss |
| DEL00008722 | chr1 | 145,811,709 | 145,811,768 | 59    | Loss |
| DEL00008726 | chr1 | 145,887,167 | 145,887,319 | 152   | Loss |
| DEL00008727 | chr1 | 145,894,641 | 145,894,869 | 228   | Loss |
| DEL00008729 | chr1 | 145,946,372 | 145,946,974 | 602   | Loss |
| DEL00008732 | chr1 | 146,208,021 | 146,208,279 | 258   | Loss |
| DEL00008734 | chr1 | 146,225,121 | 146,225,641 | 520   | Loss |
| DEL00008737 | chr1 | 146,266,359 | 146,266,463 | 104   | Loss |
| DEL00008738 | chr1 | 146,305,985 | 146,306,348 | 363   | Loss |
| DUP00008739 | chr1 | 146,315,868 | 146,316,015 | 147   | Gain |
| DEL00008741 | chr1 | 146,427,591 | 146,427,745 | 154   | Loss |
| DEL00008742 | chr1 | 146,431,723 | 146,432,338 | 615   | Loss |
| DEL00008747 | chr1 | 146,542,610 | 146,545,261 | 2,651 | Loss |
| DEL00008757 | chr1 | 146,670,248 | 146,670,580 | 332   | Loss |
| DEL00008765 | chr1 | 146,724,696 | 146,724,769 | 73    | Loss |
| DEL00008768 | chr1 | 146,818,271 | 146,818,742 | 471   | Loss |
| DEL00008771 | chr1 | 146,819,747 | 146,820,101 | 354   | Loss |
| DEL00008774 | chr1 | 146,842,997 | 146,843,126 | 129   | Loss |
| DEL00008776 | chr1 | 146,885,146 | 146,885,594 | 448   | Loss |
| DEL00008780 | chr1 | 146,935,766 | 146,936,457 | 691   | Loss |
| DEL00008787 | chr1 | 147,001,195 | 147,001,571 | 376   | Loss |
| DEL00008790 | chr1 | 147,044,891 | 147,044,959 | 68    | Loss |
| DEL00008791 | chr1 | 147,109,360 | 147,109,491 | 131   | Loss |
| DEL00008794 | chr1 | 147,144,346 | 147,144,654 | 308   | Loss |
| DEL00008797 | chr1 | 147,288,351 | 147,288,423 | 72    | Loss |

|             |      |             |             |        |      |
|-------------|------|-------------|-------------|--------|------|
| DEL00008803 | chr1 | 147,436,373 | 147,436,454 | 81     | Loss |
| DEL00008813 | chr1 | 147,588,895 | 147,589,070 | 175    | Loss |
| DUP00008815 | chr1 | 147,664,174 | 147,684,522 | 20,348 | Gain |
| DEL00008816 | chr1 | 147,699,167 | 147,706,699 | 7,532  | Loss |
| DEL00008818 | chr1 | 147,767,322 | 147,771,615 | 4,293  | Loss |
| DEL00008822 | chr1 | 147,850,648 | 147,851,138 | 490    | Loss |
| DEL00008823 | chr1 | 147,874,803 | 147,875,315 | 512    | Loss |
| DEL00008831 | chr1 | 147,989,689 | 147,990,691 | 1,002  | Loss |
| DEL00008833 | chr1 | 148,014,553 | 148,014,657 | 104    | Loss |
| DEL00008834 | chr1 | 148,059,434 | 148,059,867 | 433    | Loss |
| DEL00008840 | chr1 | 148,120,131 | 148,120,696 | 565    | Loss |
| DEL00008841 | chr1 | 148,150,069 | 148,150,151 | 82     | Loss |
| DEL00008843 | chr1 | 148,206,323 | 148,207,318 | 995    | Loss |
| DEL00008850 | chr1 | 148,273,118 | 148,274,047 | 929    | Loss |
| DEL00008857 | chr1 | 148,325,255 | 148,328,275 | 3,020  | Loss |
| DEL00008858 | chr1 | 148,366,174 | 148,366,862 | 688    | Loss |
| DEL00008859 | chr1 | 148,460,641 | 148,460,697 | 56     | Loss |
| DEL00008860 | chr1 | 148,471,994 | 148,472,261 | 267    | Loss |
| DEL00008863 | chr1 | 148,504,361 | 148,504,649 | 288    | Loss |
| DEL00008866 | chr1 | 148,511,128 | 148,511,377 | 249    | Loss |
| DEL00008868 | chr1 | 148,541,243 | 148,541,765 | 522    | Loss |
| DEL00008871 | chr1 | 148,553,619 | 148,553,939 | 320    | Loss |
| DEL00008873 | chr1 | 148,578,069 | 148,579,407 | 1,338  | Loss |
| DEL00008876 | chr1 | 148,627,311 | 148,627,536 | 225    | Loss |
| DEL00008878 | chr1 | 148,646,751 | 148,647,121 | 370    | Loss |
| DEL00008879 | chr1 | 148,673,487 | 148,673,943 | 456    | Loss |
| DEL00008882 | chr1 | 148,675,098 | 148,675,758 | 660    | Loss |
| DEL00008885 | chr1 | 148,767,298 | 148,767,920 | 622    | Loss |
| DEL00008887 | chr1 | 148,838,270 | 148,838,400 | 130    | Loss |
| DEL00008889 | chr1 | 148,918,822 | 148,919,131 | 309    | Loss |
| DEL00008890 | chr1 | 148,927,271 | 148,927,333 | 62     | Loss |
| DEL00008891 | chr1 | 148,927,769 | 148,928,063 | 294    | Loss |
| DEL00008893 | chr1 | 148,956,564 | 148,956,683 | 119    | Loss |
| DEL00008895 | chr1 | 148,993,237 | 148,993,427 | 190    | Loss |
| DEL00008898 | chr1 | 149,095,114 | 149,095,179 | 65     | Loss |
| DEL00008901 | chr1 | 149,238,045 | 149,238,179 | 134    | Loss |
| DEL00008902 | chr1 | 149,293,971 | 149,294,371 | 400    | Loss |
| DEL00008903 | chr1 | 149,311,452 | 149,311,588 | 136    | Loss |
| DEL00008904 | chr1 | 149,371,872 | 149,373,215 | 1,343  | Loss |
| DEL00008910 | chr1 | 149,443,504 | 149,443,648 | 144    | Loss |
| DEL00008911 | chr1 | 149,525,048 | 149,525,276 | 228    | Loss |
| DEL00008912 | chr1 | 149,525,335 | 149,525,469 | 134    | Loss |
| DEL00008924 | chr1 | 149,611,269 | 149,619,214 | 7,945  | Loss |
| DEL00008926 | chr1 | 149,654,314 | 149,654,504 | 190    | Loss |
| DEL00008937 | chr1 | 149,801,952 | 149,803,195 | 1,243  | Loss |
| DEL00008939 | chr1 | 149,886,001 | 149,890,653 | 4,652  | Loss |
| DEL00008940 | chr1 | 149,926,346 | 149,926,829 | 483    | Loss |
| DEL00008941 | chr1 | 149,926,957 | 149,927,305 | 348    | Loss |
| DEL00008942 | chr1 | 149,929,506 | 149,930,917 | 1,411  | Loss |

|             |      |             |             |        |      |
|-------------|------|-------------|-------------|--------|------|
| DEL00008948 | chr1 | 150,050,928 | 150,050,984 | 56     | Loss |
| DEL00008953 | chr1 | 150,100,064 | 150,100,489 | 425    | Loss |
| DEL00008957 | chr1 | 150,124,581 | 150,128,446 | 3,865  | Loss |
| DEL00008958 | chr1 | 150,132,621 | 150,132,684 | 63     | Loss |
| DEL00008961 | chr1 | 150,163,505 | 150,163,572 | 67     | Loss |
| DEL00008962 | chr1 | 150,212,589 | 150,216,877 | 4,288  | Loss |
| DEL00008965 | chr1 | 150,279,415 | 150,279,955 | 540    | Loss |
| DEL00008967 | chr1 | 150,320,689 | 150,321,658 | 969    | Loss |
| DEL00008968 | chr1 | 150,334,611 | 150,334,669 | 58     | Loss |
| DEL00008971 | chr1 | 150,389,251 | 150,389,618 | 367    | Loss |
| DEL00008975 | chr1 | 150,491,551 | 150,491,718 | 167    | Loss |
| DEL00008981 | chr1 | 150,562,012 | 150,562,262 | 250    | Loss |
| DEL00008983 | chr1 | 150,634,057 | 150,645,898 | 11,841 | Loss |
| DEL00008984 | chr1 | 150,652,087 | 150,652,973 | 886    | Loss |
| DEL00008999 | chr1 | 150,909,617 | 150,916,308 | 6,691  | Loss |
| DEL00009007 | chr1 | 150,965,720 | 150,965,970 | 250    | Loss |
| DEL00009010 | chr1 | 150,996,238 | 150,996,801 | 563    | Loss |
| DEL00009011 | chr1 | 151,012,515 | 151,014,156 | 1,641  | Loss |
| DEL00009014 | chr1 | 151,046,231 | 151,048,547 | 2,316  | Loss |
| DEL00009018 | chr1 | 151,074,675 | 151,076,436 | 1,761  | Loss |
| DEL00009020 | chr1 | 151,101,233 | 151,102,938 | 1,705  | Loss |
| DEL00009026 | chr1 | 151,253,201 | 151,253,262 | 61     | Loss |
| DEL00009027 | chr1 | 151,299,234 | 151,299,417 | 183    | Loss |
| DEL00009028 | chr1 | 151,314,526 | 151,314,659 | 133    | Loss |
| DEL00009031 | chr1 | 151,364,896 | 151,366,565 | 1,669  | Loss |
| DUP00009032 | chr1 | 151,378,757 | 151,378,890 | 133    | Gain |
| DEL00009036 | chr1 | 151,424,865 | 151,425,018 | 153    | Loss |
| DEL00009037 | chr1 | 151,437,698 | 151,444,051 | 6,353  | Loss |
| DEL00009042 | chr1 | 151,461,741 | 151,462,055 | 314    | Loss |
| DEL00009048 | chr1 | 151,491,565 | 151,491,692 | 127    | Loss |
| DEL00009056 | chr1 | 151,576,083 | 151,577,368 | 1,285  | Loss |
| DEL00009064 | chr1 | 151,671,817 | 151,672,325 | 508    | Loss |
| DEL00009066 | chr1 | 151,677,989 | 151,678,045 | 56     | Loss |
| DEL00009067 | chr1 | 151,679,778 | 151,680,738 | 960    | Loss |
| DEL00009070 | chr1 | 151,701,241 | 151,702,194 | 953    | Loss |
| DEL00009071 | chr1 | 151,705,344 | 151,705,988 | 644    | Loss |
| DEL00009074 | chr1 | 151,740,546 | 151,741,649 | 1,103  | Loss |
| DEL00009082 | chr1 | 151,761,209 | 151,761,273 | 64     | Loss |
| DEL00009083 | chr1 | 151,770,088 | 151,770,298 | 210    | Loss |
| DEL00009092 | chr1 | 151,890,219 | 151,890,986 | 767    | Loss |
| DEL00009094 | chr1 | 151,913,203 | 151,913,263 | 60     | Loss |
| DEL00009097 | chr1 | 151,949,731 | 151,949,967 | 236    | Loss |
| DEL00009098 | chr1 | 151,964,679 | 151,964,775 | 96     | Loss |
| DEL00009100 | chr1 | 151,994,186 | 151,994,345 | 159    | Loss |
| DEL00009102 | chr1 | 152,011,799 | 152,011,878 | 79     | Loss |
| DEL00009105 | chr1 | 152,069,692 | 152,069,802 | 110    | Loss |
| DEL00009110 | chr1 | 152,255,233 | 152,255,287 | 54     | Loss |
| DEL00009115 | chr1 | 152,342,245 | 152,342,609 | 364    | Loss |
| DEL00009118 | chr1 | 152,360,483 | 152,361,103 | 620    | Loss |

|             |      |             |             |        |       |
|-------------|------|-------------|-------------|--------|-------|
| DEL00009119 | chr1 | 152,362,330 | 152,362,784 | 454    | Loss  |
| DEL00009120 | chr1 | 152,391,990 | 152,393,487 | 1,497  | Loss  |
| DEL00009122 | chr1 | 152,415,590 | 152,415,943 | 353    | Loss  |
| DEL00009123 | chr1 | 152,426,019 | 152,426,326 | 307    | Loss  |
| DEL00009125 | chr1 | 152,442,247 | 152,442,888 | 641    | Loss  |
| DEL00009127 | chr1 | 152,443,859 | 152,446,024 | 2,165  | Loss  |
| DEL00009130 | chr1 | 152,452,677 | 152,452,875 | 198    | Loss  |
| DEL00009133 | chr1 | 152,467,121 | 152,467,594 | 473    | Loss  |
| DEL00009142 | chr1 | 152,670,572 | 152,671,411 | 839    | Loss  |
| DEL00009159 | chr1 | 152,784,060 | 152,784,406 | 346    | Loss  |
| DEL00009163 | chr1 | 152,848,584 | 152,849,455 | 871    | Loss  |
| DEL00009167 | chr1 | 152,874,554 | 152,874,683 | 129    | Loss  |
| DEL00009173 | chr1 | 152,928,946 | 152,929,416 | 470    | Loss  |
| DEL00009174 | chr1 | 152,948,401 | 152,948,502 | 101    | Loss  |
| DEL00009178 | chr1 | 152,980,977 | 152,981,120 | 143    | Loss  |
| DEL00009183 | chr1 | 152,997,376 | 152,999,374 | 1,998  | Loss  |
| DEL00009184 | chr1 | 153,005,604 | 153,005,710 | 106    | Loss  |
| DEL00009187 | chr1 | 153,017,964 | 153,020,075 | 2,111  | Loss  |
| DEL00009197 | chr1 | 153,194,859 | 153,194,959 | 100    | Loss  |
| DEL00009198 | chr1 | 153,198,126 | 153,199,587 | 1,461  | Loss  |
| DUP00009199 | chr1 | 153,205,029 | 153,205,088 | 59     | Gain  |
| DEL00009200 | chr1 | 153,209,190 | 153,209,439 | 249    | Loss  |
| DEL00009202 | chr1 | 153,220,264 | 153,222,462 | 2,198  | Loss  |
| DUP00009212 | chr1 | 153,299,949 | 153,300,059 | 110    | Gain  |
| DEL00009215 | chr1 | 153,306,008 | 153,306,609 | 601    | Loss  |
| DUP00009216 | chr1 | 153,320,766 | 153,332,011 | 11,245 | Mixed |
| DEL00009235 | chr1 | 153,555,481 | 153,560,320 | 4,839  | Loss  |
| DEL00009239 | chr1 | 153,642,228 | 153,642,295 | 67     | Loss  |
| DEL00009240 | chr1 | 153,644,425 | 153,644,517 | 92     | Loss  |
| DEL00009242 | chr1 | 153,712,699 | 153,712,808 | 109    | Loss  |
| DEL00009247 | chr1 | 153,902,307 | 153,903,704 | 1,397  | Loss  |
| DEL00009248 | chr1 | 153,908,728 | 153,909,250 | 522    | Loss  |
| DEL00009251 | chr1 | 153,923,071 | 153,923,365 | 294    | Loss  |
| DEL00009253 | chr1 | 153,949,268 | 153,949,354 | 86     | Loss  |
| DEL00009273 | chr1 | 154,176,605 | 154,176,776 | 171    | Loss  |
| DEL00009276 | chr1 | 154,187,742 | 154,187,828 | 86     | Loss  |
| DEL00009283 | chr1 | 154,206,976 | 154,207,566 | 590    | Loss  |
| DEL00009284 | chr1 | 154,210,417 | 154,211,152 | 735    | Loss  |
| DEL00009287 | chr1 | 154,265,290 | 154,265,566 | 276    | Loss  |
| DEL00009288 | chr1 | 154,309,282 | 154,309,396 | 114    | Loss  |
| DEL00009298 | chr1 | 154,489,113 | 154,489,375 | 262    | Loss  |
| DEL00009300 | chr1 | 154,581,221 | 154,581,280 | 59     | Loss  |
| DEL00009306 | chr1 | 154,640,977 | 154,641,087 | 110    | Loss  |
| DEL00009307 | chr1 | 154,679,884 | 154,680,015 | 131    | Loss  |
| DEL00009308 | chr1 | 154,682,903 | 154,683,038 | 135    | Loss  |
| DEL00009310 | chr1 | 154,683,393 | 154,685,406 | 2,013  | Loss  |
| DEL00009322 | chr1 | 154,801,742 | 154,801,814 | 72     | Loss  |
| DEL00009323 | chr1 | 154,837,362 | 154,837,416 | 54     | Loss  |
| DEL00009325 | chr1 | 154,861,251 | 154,861,471 | 220    | Loss  |

|             |      |             |             |         |      |
|-------------|------|-------------|-------------|---------|------|
| DEL00009331 | chr1 | 154,918,731 | 154,918,904 | 173     | Loss |
| DEL00009332 | chr1 | 154,957,051 | 154,960,014 | 2,963   | Loss |
| DEL00009337 | chr1 | 155,036,374 | 155,036,522 | 148     | Loss |
| DEL00009344 | chr1 | 155,080,681 | 155,080,745 | 64      | Loss |
| DEL00009345 | chr1 | 155,104,397 | 155,105,254 | 857     | Loss |
| DEL00009348 | chr1 | 155,162,105 | 155,163,377 | 1,272   | Loss |
| DEL00009351 | chr1 | 155,173,115 | 155,175,127 | 2,012   | Loss |
| DEL00009353 | chr1 | 155,207,427 | 155,210,440 | 3,013   | Loss |
| DEL00009357 | chr1 | 155,234,887 | 155,235,145 | 258     | Loss |
| DEL00009359 | chr1 | 155,257,405 | 155,257,476 | 71      | Loss |
| DEL00009364 | chr1 | 155,331,718 | 155,331,802 | 84      | Loss |
| DEL00009365 | chr1 | 155,379,019 | 155,379,081 | 62      | Loss |
| DEL00009367 | chr1 | 155,409,914 | 155,409,972 | 58      | Loss |
| DEL00009387 | chr1 | 155,454,884 | 155,456,040 | 1,156   | Loss |
| DEL00009395 | chr1 | 155,565,106 | 155,566,052 | 946     | Loss |
| DUP00009406 | chr1 | 155,724,784 | 155,736,333 | 11,549  | Gain |
| DEL00009407 | chr1 | 155,765,444 | 155,768,819 | 3,375   | Loss |
| DEL00009414 | chr1 | 155,814,542 | 155,814,604 | 62      | Loss |
| DEL00009416 | chr1 | 155,828,497 | 155,828,893 | 396     | Loss |
| DEL00009417 | chr1 | 155,846,802 | 155,848,670 | 1,868   | Loss |
| DEL00009426 | chr1 | 156,019,750 | 156,019,963 | 213     | Loss |
| DEL00009431 | chr1 | 156,075,882 | 156,076,503 | 621     | Loss |
| DEL00009446 | chr1 | 156,172,838 | 156,173,168 | 330     | Loss |
| DEL00009452 | chr1 | 156,316,337 | 156,316,508 | 171     | Loss |
| DEL00009460 | chr1 | 156,368,397 | 156,368,916 | 519     | Loss |
| DEL00009462 | chr1 | 156,371,417 | 156,372,240 | 823     | Loss |
| DEL00009465 | chr1 | 156,387,463 | 156,388,390 | 927     | Loss |
| DEL00009467 | chr1 | 156,391,600 | 156,391,655 | 55      | Loss |
| DEL00009470 | chr1 | 156,444,209 | 156,444,269 | 60      | Loss |
| DEL00009483 | chr1 | 156,489,555 | 156,489,646 | 91      | Loss |
| DEL00009488 | chr1 | 156,511,340 | 156,511,432 | 92      | Loss |
| DEL00009492 | chr1 | 156,555,921 | 156,555,997 | 76      | Loss |
| DEL00009493 | chr1 | 156,591,600 | 156,591,674 | 74      | Loss |
| DEL00009496 | chr1 | 156,620,477 | 156,621,156 | 679     | Loss |
| DEL00009515 | chr1 | 156,766,850 | 156,767,073 | 223     | Loss |
| DEL00009519 | chr1 | 156,797,594 | 156,803,944 | 6,350   | Loss |
| DEL00009521 | chr1 | 156,831,802 | 156,831,889 | 87      | Loss |
| DEL00009522 | chr1 | 156,846,591 | 156,846,776 | 185     | Loss |
| DEL00009529 | chr1 | 156,931,230 | 156,931,428 | 198     | Loss |
| DEL00009540 | chr1 | 157,076,843 | 157,076,933 | 90      | Loss |
| DUP00009547 | chr1 | 157,168,764 | 157,168,831 | 67      | Gain |
| DEL00009552 | chr1 | 157,218,241 | 157,218,297 | 56      | Loss |
| DEL00009561 | chr1 | 157,242,615 | 157,243,257 | 642     | Loss |
| DEL00009568 | chr1 | 157,261,690 | 157,261,813 | 123     | Loss |
| DEL00009585 | chr1 | 157,613,391 | 157,614,846 | 1,455   | Loss |
| DEL00009588 | chr1 | 157,631,946 | 157,636,611 | 4,665   | Loss |
| DEL00009589 | chr1 | 157,652,548 | 157,652,686 | 138     | Loss |
| DEL00009593 | chr1 | 157,745,558 | 157,876,776 | 131,218 | Loss |
| DEL00009604 | chr1 | 157,966,876 | 157,967,112 | 236     | Loss |



|             |      |             |             |       |      |
|-------------|------|-------------|-------------|-------|------|
| DEL00009609 | chr1 | 158,018,615 | 158,018,668 | 53    | Loss |
| DEL00009617 | chr1 | 158,171,683 | 158,175,735 | 4,052 | Loss |
| DEL00009621 | chr1 | 158,195,276 | 158,195,981 | 705   | Loss |
| DEL00009624 | chr1 | 158,212,428 | 158,212,520 | 92    | Loss |
| DEL00009625 | chr1 | 158,247,733 | 158,247,965 | 232   | Loss |
| DEL00009626 | chr1 | 158,283,797 | 158,283,877 | 80    | Loss |
| DEL00009628 | chr1 | 158,310,289 | 158,311,920 | 1,631 | Loss |
| DEL00009634 | chr1 | 158,349,981 | 158,350,106 | 125   | Loss |
| DEL00009638 | chr1 | 158,396,655 | 158,397,158 | 503   | Loss |
| DEL00009639 | chr1 | 158,500,685 | 158,500,755 | 70    | Loss |
| DEL00009642 | chr1 | 158,600,520 | 158,602,754 | 2,234 | Loss |
| DEL00009646 | chr1 | 158,677,817 | 158,677,938 | 121   | Loss |
| DEL00009650 | chr1 | 158,704,770 | 158,705,696 | 926   | Loss |
| DEL00009653 | chr1 | 158,716,503 | 158,717,565 | 1,062 | Loss |
| DEL00009659 | chr1 | 158,777,513 | 158,777,564 | 51    | Loss |
| DEL00009663 | chr1 | 158,803,104 | 158,803,182 | 78    | Loss |
| DEL00009664 | chr1 | 158,803,608 | 158,803,704 | 96    | Loss |
| DEL00009666 | chr1 | 158,844,376 | 158,846,753 | 2,377 | Loss |
| DEL00009668 | chr1 | 158,853,745 | 158,854,385 | 640   | Loss |
| DEL00009676 | chr1 | 158,903,813 | 158,905,073 | 1,260 | Loss |
| DEL00009677 | chr1 | 158,917,778 | 158,917,964 | 186   | Loss |
| DEL00009678 | chr1 | 158,925,019 | 158,926,964 | 1,945 | Loss |
| DEL00009688 | chr1 | 158,971,631 | 158,971,728 | 97    | Loss |
| DEL00009689 | chr1 | 158,975,889 | 158,976,704 | 815   | Loss |
| DEL00009702 | chr1 | 159,033,037 | 159,033,105 | 68    | Loss |
| DEL00009704 | chr1 | 159,069,771 | 159,069,913 | 142   | Loss |
| DEL00009717 | chr1 | 159,243,911 | 159,245,372 | 1,461 | Loss |
| DEL00009721 | chr1 | 159,253,755 | 159,253,818 | 63    | Loss |
| DEL00009733 | chr1 | 159,360,436 | 159,360,581 | 145   | Loss |
| DEL00009735 | chr1 | 159,398,395 | 159,401,877 | 3,482 | Loss |
| DEL00009748 | chr1 | 159,547,269 | 159,550,432 | 3,163 | Loss |
| DEL00009761 | chr1 | 159,829,627 | 159,830,311 | 684   | Loss |
| DEL00009773 | chr1 | 159,954,642 | 159,955,388 | 746   | Loss |
| DEL00009775 | chr1 | 160,099,910 | 160,099,973 | 63    | Loss |
| DEL00009777 | chr1 | 160,191,101 | 160,191,986 | 885   | Loss |
| DEL00009778 | chr1 | 160,291,913 | 160,291,996 | 83    | Loss |
| DEL00009781 | chr1 | 160,377,492 | 160,377,552 | 60    | Loss |
| DEL00009784 | chr1 | 160,479,737 | 160,480,636 | 899   | Loss |
| DEL00009794 | chr1 | 160,668,608 | 160,669,527 | 919   | Loss |
| DEL00009795 | chr1 | 160,693,203 | 160,693,386 | 183   | Loss |
| DEL00009797 | chr1 | 160,722,999 | 160,723,055 | 56    | Loss |
| DEL00009804 | chr1 | 160,891,185 | 160,892,447 | 1,262 | Loss |
| DEL00009806 | chr1 | 160,929,668 | 160,930,061 | 393   | Loss |
| DEL00009808 | chr1 | 161,014,379 | 161,016,290 | 1,911 | Loss |
| DEL00009816 | chr1 | 161,123,476 | 161,123,892 | 416   | Loss |
| DEL00009817 | chr1 | 161,185,303 | 161,186,120 | 817   | Loss |
| DEL00009818 | chr1 | 161,189,268 | 161,189,445 | 177   | Loss |
| DEL00009820 | chr1 | 161,214,551 | 161,217,375 | 2,824 | Loss |
| DEL00009822 | chr1 | 161,217,554 | 161,218,279 | 725   | Loss |

|             |      |             |             |       |      |
|-------------|------|-------------|-------------|-------|------|
| DEL00009823 | chr1 | 161,241,439 | 161,241,724 | 285   | Loss |
| DEL00009833 | chr1 | 161,271,523 | 161,272,420 | 897   | Loss |
| DEL00009834 | chr1 | 161,302,472 | 161,303,055 | 583   | Loss |
| DEL00009836 | chr1 | 161,317,299 | 161,317,762 | 463   | Loss |
| DEL00009839 | chr1 | 161,376,038 | 161,376,459 | 421   | Loss |
| DEL00009842 | chr1 | 161,424,448 | 161,425,368 | 920   | Loss |
| DEL00009843 | chr1 | 161,428,826 | 161,433,480 | 4,654 | Loss |
| DEL00009848 | chr1 | 161,502,445 | 161,502,738 | 293   | Loss |
| DUP00009849 | chr1 | 161,514,924 | 161,514,987 | 63    | Gain |
| DUP00009850 | chr1 | 161,583,863 | 161,592,050 | 8,187 | Gain |
| DEL00009862 | chr1 | 161,912,705 | 161,912,757 | 52    | Loss |
| DEL00009869 | chr1 | 162,214,453 | 162,215,097 | 644   | Loss |
| DEL00009872 | chr1 | 162,301,633 | 162,302,370 | 737   | Loss |
| DEL00009876 | chr1 | 162,378,122 | 162,378,183 | 61    | Loss |
| DEL00009877 | chr1 | 162,398,701 | 162,399,544 | 843   | Loss |
| DEL00009880 | chr1 | 162,430,246 | 162,430,699 | 453   | Loss |
| DEL00009881 | chr1 | 162,449,808 | 162,449,864 | 56    | Loss |
| DEL00009887 | chr1 | 162,507,516 | 162,507,673 | 157   | Loss |
| DEL00009888 | chr1 | 162,550,118 | 162,550,614 | 496   | Loss |
| DEL00009890 | chr1 | 162,590,621 | 162,591,015 | 394   | Loss |
| DEL00009895 | chr1 | 162,622,490 | 162,629,420 | 6,930 | Loss |
| DEL00009897 | chr1 | 162,668,995 | 162,669,609 | 614   | Loss |
| DEL00009898 | chr1 | 162,671,323 | 162,671,669 | 346   | Loss |
| DEL00009903 | chr1 | 162,742,068 | 162,742,193 | 125   | Loss |
| DEL00009906 | chr1 | 162,777,233 | 162,777,301 | 68    | Loss |
| DEL00009908 | chr1 | 162,800,683 | 162,801,221 | 538   | Loss |
| DEL00009909 | chr1 | 162,807,489 | 162,807,960 | 471   | Loss |
| DEL00009918 | chr1 | 162,919,205 | 162,919,278 | 73    | Loss |
| DEL00009924 | chr1 | 162,993,676 | 162,994,564 | 888   | Loss |
| DEL00009925 | chr1 | 162,994,866 | 162,995,220 | 354   | Loss |
| DEL00009927 | chr1 | 163,015,694 | 163,017,201 | 1,507 | Loss |
| DEL00009933 | chr1 | 163,051,671 | 163,052,843 | 1,172 | Loss |
| DEL00009935 | chr1 | 163,136,254 | 163,136,715 | 461   | Loss |
| DEL00009942 | chr1 | 163,192,537 | 163,192,609 | 72    | Loss |
| DEL00009951 | chr1 | 163,396,122 | 163,396,646 | 524   | Loss |
| DEL00009958 | chr1 | 163,677,047 | 163,677,881 | 834   | Loss |
| DEL00009966 | chr1 | 163,729,399 | 163,729,685 | 286   | Loss |
| DEL00009968 | chr1 | 163,742,390 | 163,742,471 | 81    | Loss |
| DEL00009969 | chr1 | 163,812,963 | 163,814,136 | 1,173 | Loss |
| DEL00009973 | chr1 | 163,849,613 | 163,850,500 | 887   | Loss |
| DEL00009974 | chr1 | 163,864,040 | 163,865,216 | 1,176 | Loss |
| DEL00009975 | chr1 | 163,879,848 | 163,880,494 | 646   | Loss |
| DUP00009976 | chr1 | 163,907,024 | 163,909,132 | 2,108 | Gain |
| DEL00009977 | chr1 | 163,923,294 | 163,923,356 | 62    | Loss |
| DEL00009978 | chr1 | 163,964,099 | 163,964,658 | 559   | Loss |
| DEL00009980 | chr1 | 163,997,473 | 163,998,516 | 1,043 | Loss |
| DEL00009981 | chr1 | 164,007,154 | 164,007,587 | 433   | Loss |
| DEL00009983 | chr1 | 164,026,892 | 164,027,227 | 335   | Loss |
| DEL00009984 | chr1 | 164,049,406 | 164,049,537 | 131   | Loss |

|             |      |             |             |        |      |
|-------------|------|-------------|-------------|--------|------|
| DEL00010000 | chr1 | 164,113,580 | 164,114,033 | 453    | Loss |
| DEL00010005 | chr1 | 164,244,402 | 164,244,648 | 246    | Loss |
| DEL00010008 | chr1 | 164,271,113 | 164,271,593 | 480    | Loss |
| DEL00010010 | chr1 | 164,353,803 | 164,354,297 | 494    | Loss |
| DUP00010014 | chr1 | 164,500,228 | 164,500,341 | 113    | Gain |
| DEL00010015 | chr1 | 164,574,962 | 164,575,182 | 220    | Loss |
| DEL00010019 | chr1 | 164,648,484 | 164,649,140 | 656    | Loss |
| DEL00010021 | chr1 | 164,778,704 | 164,778,997 | 293    | Loss |
| DEL00010022 | chr1 | 164,891,570 | 164,891,983 | 413    | Loss |
| DEL00010027 | chr1 | 164,931,205 | 164,938,014 | 6,809  | Loss |
| DEL00010034 | chr1 | 165,093,517 | 165,099,726 | 6,209  | Loss |
| DEL00010035 | chr1 | 165,107,016 | 165,124,939 | 17,923 | Loss |
| DEL00010040 | chr1 | 165,129,026 | 165,129,249 | 223    | Loss |
| DEL00010053 | chr1 | 165,292,395 | 165,296,615 | 4,220  | Loss |
| DEL00010054 | chr1 | 165,365,475 | 165,366,652 | 1,177  | Loss |
| DEL00010057 | chr1 | 165,471,358 | 165,472,915 | 1,557  | Loss |
| DEL00010066 | chr1 | 165,634,575 | 165,634,697 | 122    | Loss |
| DUP00010067 | chr1 | 165,671,101 | 165,671,238 | 137    | Gain |
| DEL00010073 | chr1 | 165,836,851 | 165,837,316 | 465    | Loss |
| DEL00010075 | chr1 | 165,895,955 | 165,896,012 | 57     | Loss |
| DEL00010086 | chr1 | 166,084,083 | 166,084,143 | 60     | Loss |
| DEL00010087 | chr1 | 166,098,138 | 166,098,196 | 58     | Loss |
| DEL00010093 | chr1 | 166,215,779 | 166,215,840 | 61     | Loss |
| DEL00010094 | chr1 | 166,262,097 | 166,262,202 | 105    | Loss |
| DEL00010096 | chr1 | 166,299,599 | 166,300,126 | 527    | Loss |
| DEL00010100 | chr1 | 166,426,526 | 166,426,640 | 114    | Loss |
| DEL00010106 | chr1 | 166,592,248 | 166,592,317 | 69     | Loss |
| DEL00010111 | chr1 | 166,665,451 | 166,665,618 | 167    | Loss |
| DEL00010117 | chr1 | 166,828,956 | 166,829,623 | 667    | Loss |
| DEL00010120 | chr1 | 166,927,390 | 166,927,998 | 608    | Loss |
| DEL00010122 | chr1 | 166,955,961 | 166,956,096 | 135    | Loss |
| DEL00010124 | chr1 | 167,012,272 | 167,012,323 | 51     | Loss |
| DUP00010126 | chr1 | 167,024,257 | 167,024,356 | 99     | Gain |
| DEL00010133 | chr1 | 167,188,551 | 167,189,057 | 506    | Loss |
| DEL00010135 | chr1 | 167,375,876 | 167,375,997 | 121    | Loss |
| DEL00010138 | chr1 | 167,513,240 | 167,513,718 | 478    | Loss |
| DEL00010139 | chr1 | 167,553,182 | 167,553,433 | 251    | Loss |
| DEL00010140 | chr1 | 167,565,065 | 167,565,158 | 93     | Loss |
| DEL00010150 | chr1 | 167,859,897 | 167,860,169 | 272    | Loss |
| DEL00010156 | chr1 | 168,014,743 | 168,014,795 | 52     | Loss |
| DEL00010164 | chr1 | 168,181,803 | 168,182,006 | 203    | Loss |
| DEL00010165 | chr1 | 168,198,068 | 168,198,284 | 216    | Loss |
| DEL00010166 | chr1 | 168,198,500 | 168,198,700 | 200    | Loss |
| DEL00010179 | chr1 | 168,364,520 | 168,364,604 | 84     | Loss |
| DEL00010181 | chr1 | 168,420,970 | 168,421,182 | 212    | Loss |
| DEL00010182 | chr1 | 168,442,953 | 168,443,447 | 494    | Loss |
| DEL00010189 | chr1 | 168,540,624 | 168,541,005 | 381    | Loss |
| DEL00010192 | chr1 | 168,581,057 | 168,581,121 | 64     | Loss |
| DEL00010194 | chr1 | 168,805,714 | 168,806,157 | 443    | Loss |

|             |      |             |             |     |      |
|-------------|------|-------------|-------------|-----|------|
| DEL00010198 | chr1 | 168,873,004 | 168,873,349 | 345 | Loss |
| DEL00010205 | chr1 | 168,996,457 | 168,996,665 | 208 | Loss |
| DEL00010208 | chr1 | 169,033,303 | 169,033,957 | 654 | Loss |
| DEL00010212 | chr1 | 169,202,485 | 169,202,822 | 337 | Loss |
| DEL00010217 | chr1 | 169,246,606 | 169,246,970 | 364 | Loss |
| DEL00010222 | chr1 | 169,358,250 | 169,358,930 | 680 | Loss |
| DEL00010226 | chr1 | 169,375,950 | 169,376,274 | 324 | Loss |
| DEL00010227 | chr1 | 169,392,824 | 169,392,883 | 59  | Loss |
| DEL00010239 | chr1 | 169,536,867 | 169,536,923 | 56  | Loss |
| DEL00010241 | chr1 | 169,561,407 | 169,561,743 | 336 | Loss |
| DEL00010243 | chr1 | 169,593,430 | 169,593,741 | 311 | Loss |
| DEL00010244 | chr1 | 169,608,969 | 169,609,062 | 93  | Loss |
| DEL00010250 | chr1 | 169,668,761 | 169,669,432 | 671 | Loss |
| DEL00010254 | chr1 | 169,746,599 | 169,747,045 | 446 | Loss |
| DEL00010260 | chr1 | 169,862,052 | 169,862,353 | 301 | Loss |
| DEL00010261 | chr1 | 169,867,310 | 169,867,379 | 69  | Loss |
| DEL00010266 | chr1 | 169,931,656 | 169,931,770 | 114 | Loss |
| DUP00010267 | chr1 | 169,940,114 | 169,940,213 | 99  | Gain |
| DEL00010268 | chr1 | 169,955,045 | 169,955,603 | 558 | Loss |
| DEL00010271 | chr1 | 169,968,910 | 169,969,019 | 109 | Loss |
| DEL00010277 | chr1 | 170,139,868 | 170,140,106 | 238 | Loss |
| DEL00010281 | chr1 | 170,190,755 | 170,190,853 | 98  | Loss |
| DEL00010289 | chr1 | 170,292,507 | 170,292,562 | 55  | Loss |
| DEL00010293 | chr1 | 170,368,202 | 170,368,297 | 95  | Loss |
| DEL00010297 | chr1 | 170,484,904 | 170,485,091 | 187 | Loss |
| DEL00010299 | chr1 | 170,512,054 | 170,512,237 | 183 | Loss |
| DEL00010303 | chr1 | 170,663,864 | 170,664,848 | 984 | Loss |
| DEL00010305 | chr1 | 170,745,490 | 170,745,676 | 186 | Loss |
| DEL00010318 | chr1 | 170,780,248 | 170,780,380 | 132 | Loss |
| DEL00010340 | chr1 | 171,112,964 | 171,113,465 | 501 | Loss |
| DEL00010341 | chr1 | 171,150,282 | 171,150,343 | 61  | Loss |
| DEL00010344 | chr1 | 171,166,645 | 171,166,869 | 224 | Loss |
| DEL00010350 | chr1 | 171,214,154 | 171,214,373 | 219 | Loss |
| DEL00010357 | chr1 | 171,273,863 | 171,274,434 | 571 | Loss |
| DEL00010359 | chr1 | 171,293,248 | 171,293,304 | 56  | Loss |
| DEL00010367 | chr1 | 171,343,263 | 171,343,440 | 177 | Loss |
| DEL00010368 | chr1 | 171,357,307 | 171,357,359 | 52  | Loss |
| DEL00010369 | chr1 | 171,359,067 | 171,359,191 | 124 | Loss |
| DEL00010378 | chr1 | 171,454,954 | 171,455,158 | 204 | Loss |
| DEL00010385 | chr1 | 171,638,849 | 171,638,963 | 114 | Loss |
| DEL00010388 | chr1 | 171,734,142 | 171,734,358 | 216 | Loss |
| DEL00010390 | chr1 | 171,763,896 | 171,763,986 | 90  | Loss |
| DEL00010391 | chr1 | 171,802,020 | 171,802,077 | 57  | Loss |
| DEL00010398 | chr1 | 171,878,093 | 171,878,284 | 191 | Loss |
| DEL00010400 | chr1 | 171,930,707 | 171,930,865 | 158 | Loss |
| DEL00010410 | chr1 | 172,065,120 | 172,065,266 | 146 | Loss |
| DEL00010417 | chr1 | 172,215,880 | 172,215,971 | 91  | Loss |
| DEL00010419 | chr1 | 172,227,926 | 172,228,119 | 193 | Loss |
| DEL00010420 | chr1 | 172,258,676 | 172,258,816 | 140 | Loss |

|             |      |             |             |       |      |
|-------------|------|-------------|-------------|-------|------|
| DEL00010421 | chr1 | 172,268,060 | 172,271,864 | 3,804 | Loss |
| DEL00010427 | chr1 | 172,393,059 | 172,393,110 | 51    | Loss |
| DEL00010432 | chr1 | 172,442,121 | 172,443,362 | 1,241 | Loss |
| DEL00010436 | chr1 | 172,492,571 | 172,493,009 | 438   | Loss |
| DEL00010437 | chr1 | 172,510,352 | 172,511,085 | 733   | Loss |
| DEL00010444 | chr1 | 172,619,528 | 172,620,089 | 561   | Loss |
| DEL00010449 | chr1 | 172,663,423 | 172,664,436 | 1,013 | Loss |
| DEL00010451 | chr1 | 172,718,990 | 172,719,089 | 99    | Loss |
| DEL00010452 | chr1 | 172,761,405 | 172,761,460 | 55    | Loss |
| DEL00010462 | chr1 | 172,963,799 | 172,965,419 | 1,620 | Loss |
| DEL00010463 | chr1 | 172,975,613 | 172,975,675 | 62    | Loss |
| DEL00010464 | chr1 | 172,981,450 | 172,982,217 | 767   | Loss |
| DEL00010465 | chr1 | 173,005,455 | 173,007,082 | 1,627 | Loss |
| DEL00010467 | chr1 | 173,033,879 | 173,033,974 | 95    | Loss |
| DEL00010472 | chr1 | 173,058,065 | 173,058,285 | 220   | Loss |
| DEL00010473 | chr1 | 173,062,843 | 173,063,407 | 564   | Loss |
| DEL00010476 | chr1 | 173,085,743 | 173,089,832 | 4,089 | Loss |
| DEL00010477 | chr1 | 173,093,737 | 173,093,867 | 130   | Loss |
| DEL00010478 | chr1 | 173,102,489 | 173,102,646 | 157   | Loss |
| DEL00010483 | chr1 | 173,169,282 | 173,170,817 | 1,535 | Loss |
| DEL00010484 | chr1 | 173,170,826 | 173,171,643 | 817   | Loss |
| DEL00010485 | chr1 | 173,184,247 | 173,185,048 | 801   | Loss |
| DEL00010486 | chr1 | 173,220,347 | 173,220,551 | 204   | Loss |
| DEL00010493 | chr1 | 173,413,188 | 173,413,620 | 432   | Loss |
| DEL00010494 | chr1 | 173,484,583 | 173,484,663 | 80    | Loss |
| DEL00010499 | chr1 | 173,617,573 | 173,619,933 | 2,360 | Loss |
| DEL00010501 | chr1 | 173,641,875 | 173,642,113 | 238   | Loss |
| DEL00010503 | chr1 | 173,658,258 | 173,658,344 | 86    | Loss |
| DEL00010505 | chr1 | 173,751,049 | 173,751,129 | 80    | Loss |
| DEL00010506 | chr1 | 173,761,309 | 173,763,393 | 2,084 | Loss |
| DEL00010508 | chr1 | 173,811,622 | 173,811,711 | 89    | Loss |
| DUP00010510 | chr1 | 173,887,761 | 173,894,588 | 6,827 | Gain |
| DEL00010511 | chr1 | 173,905,280 | 173,905,333 | 53    | Loss |
| DEL00010516 | chr1 | 174,061,810 | 174,061,865 | 55    | Loss |
| DEL00010518 | chr1 | 174,152,497 | 174,152,575 | 78    | Loss |
| DEL00010520 | chr1 | 174,159,540 | 174,159,600 | 60    | Loss |
| DEL00010522 | chr1 | 174,192,491 | 174,192,588 | 97    | Loss |
| DEL00010523 | chr1 | 174,241,770 | 174,242,474 | 704   | Loss |
| DEL00010527 | chr1 | 174,316,134 | 174,316,267 | 133   | Loss |
| DEL00010532 | chr1 | 174,379,690 | 174,380,595 | 905   | Loss |
| DEL00010534 | chr1 | 174,403,951 | 174,404,009 | 58    | Loss |
| DEL00010537 | chr1 | 174,496,689 | 174,496,752 | 63    | Loss |
| DEL00010542 | chr1 | 174,643,520 | 174,643,630 | 110   | Loss |
| DEL00010545 | chr1 | 174,690,851 | 174,690,948 | 97    | Loss |
| DEL00010546 | chr1 | 174,708,350 | 174,708,670 | 320   | Loss |
| DEL00010551 | chr1 | 174,759,526 | 174,759,589 | 63    | Loss |
| DEL00010553 | chr1 | 174,817,963 | 174,818,128 | 165   | Loss |
| DEL00010556 | chr1 | 174,846,299 | 174,846,353 | 54    | Loss |
| DEL00010558 | chr1 | 174,854,694 | 174,855,325 | 631   | Loss |

|             |      |             |             |       |      |
|-------------|------|-------------|-------------|-------|------|
| DEL00010559 | chr1 | 174,855,786 | 174,855,848 | 62    | Loss |
| DEL00010565 | chr1 | 175,047,957 | 175,048,658 | 701   | Loss |
| DEL00010566 | chr1 | 175,097,834 | 175,098,511 | 677   | Loss |
| DEL00010575 | chr1 | 175,161,169 | 175,161,263 | 94    | Loss |
| DEL00010576 | chr1 | 175,179,384 | 175,179,435 | 51    | Loss |
| DEL00010577 | chr1 | 175,182,139 | 175,182,281 | 142   | Loss |
| DEL00010579 | chr1 | 175,205,451 | 175,205,832 | 381   | Loss |
| DEL00010581 | chr1 | 175,280,036 | 175,280,598 | 562   | Loss |
| DEL00010585 | chr1 | 175,330,902 | 175,330,997 | 95    | Loss |
| DEL00010590 | chr1 | 175,449,911 | 175,449,971 | 60    | Loss |
| DEL00010593 | chr1 | 175,472,994 | 175,473,062 | 68    | Loss |
| DEL00010604 | chr1 | 175,650,967 | 175,651,095 | 128   | Loss |
| DEL00010607 | chr1 | 175,667,566 | 175,667,977 | 411   | Loss |
| DEL00010613 | chr1 | 175,683,859 | 175,684,043 | 184   | Loss |
| DEL00010614 | chr1 | 175,720,625 | 175,721,126 | 501   | Loss |
| DEL00010615 | chr1 | 175,743,086 | 175,743,158 | 72    | Loss |
| DEL00010622 | chr1 | 175,816,013 | 175,816,151 | 138   | Loss |
| DEL00010631 | chr1 | 175,930,249 | 175,930,390 | 141   | Loss |
| DEL00010632 | chr1 | 175,947,771 | 175,948,670 | 899   | Loss |
| DEL00010641 | chr1 | 176,349,072 | 176,349,317 | 245   | Loss |
| DEL00010644 | chr1 | 176,384,683 | 176,385,432 | 749   | Loss |
| DEL00010649 | chr1 | 176,427,607 | 176,427,818 | 211   | Loss |
| DEL00010652 | chr1 | 176,550,031 | 176,550,279 | 248   | Loss |
| DEL00010659 | chr1 | 176,620,834 | 176,620,903 | 69    | Loss |
| DEL00010660 | chr1 | 176,629,428 | 176,629,494 | 66    | Loss |
| DEL00010663 | chr1 | 176,649,837 | 176,650,051 | 214   | Loss |
| DEL00010668 | chr1 | 176,900,702 | 176,900,784 | 82    | Loss |
| DEL00010670 | chr1 | 176,928,846 | 176,928,911 | 65    | Loss |
| DEL00010673 | chr1 | 176,958,126 | 176,958,265 | 139   | Loss |
| DEL00010680 | chr1 | 177,035,502 | 177,035,790 | 288   | Loss |
| DEL00010681 | chr1 | 177,061,529 | 177,061,937 | 408   | Loss |
| DEL00010697 | chr1 | 177,258,382 | 177,258,438 | 56    | Loss |
| DEL00010701 | chr1 | 177,303,131 | 177,303,814 | 683   | Loss |
| DEL00010704 | chr1 | 177,352,310 | 177,352,405 | 95    | Loss |
| DEL00010706 | chr1 | 177,399,064 | 177,399,695 | 631   | Loss |
| DEL00010717 | chr1 | 177,511,367 | 177,512,087 | 720   | Loss |
| DEL00010725 | chr1 | 177,626,515 | 177,626,724 | 209   | Loss |
| DEL00010728 | chr1 | 177,655,968 | 177,656,450 | 482   | Loss |
| DEL00010729 | chr1 | 177,707,276 | 177,708,333 | 1,057 | Loss |
| DEL00010730 | chr1 | 177,848,575 | 177,848,630 | 55    | Loss |
| DEL00010732 | chr1 | 177,911,659 | 177,911,759 | 100   | Loss |
| DEL00010734 | chr1 | 177,935,109 | 177,935,164 | 55    | Loss |
| DEL00010735 | chr1 | 177,936,728 | 177,937,851 | 1,123 | Loss |
| DEL00010737 | chr1 | 178,009,456 | 178,009,613 | 157   | Loss |
| DEL00010738 | chr1 | 178,029,000 | 178,029,089 | 89    | Loss |
| DEL00010739 | chr1 | 178,033,540 | 178,033,595 | 55    | Loss |
| DEL00010740 | chr1 | 178,037,953 | 178,038,004 | 51    | Loss |
| DEL00010741 | chr1 | 178,047,805 | 178,049,986 | 2,181 | Loss |
| DEL00010771 | chr1 | 178,288,615 | 178,288,972 | 357   | Loss |

|             |      |             |             |        |      |
|-------------|------|-------------|-------------|--------|------|
| DEL00010775 | chr1 | 178,387,556 | 178,387,674 | 118    | Loss |
| DEL00010777 | chr1 | 178,402,366 | 178,402,932 | 566    | Loss |
| DEL00010778 | chr1 | 178,422,023 | 178,422,312 | 289    | Loss |
| DEL00010780 | chr1 | 178,487,776 | 178,487,840 | 64     | Loss |
| DEL00010782 | chr1 | 178,504,476 | 178,504,559 | 83     | Loss |
| DEL00010784 | chr1 | 178,524,050 | 178,524,139 | 89     | Loss |
| DEL00010786 | chr1 | 178,560,676 | 178,561,478 | 802    | Loss |
| DEL00010795 | chr1 | 178,647,348 | 178,647,401 | 53     | Loss |
| DEL00010805 | chr1 | 178,745,419 | 178,746,065 | 646    | Loss |
| DEL00010808 | chr1 | 178,770,386 | 178,771,152 | 766    | Loss |
| DEL00010809 | chr1 | 178,782,753 | 178,782,818 | 65     | Loss |
| DEL00010812 | chr1 | 178,846,451 | 178,846,859 | 408    | Loss |
| DEL00010815 | chr1 | 178,881,384 | 178,881,494 | 110    | Loss |
| DEL00010817 | chr1 | 178,907,334 | 178,907,886 | 552    | Loss |
| DEL00010825 | chr1 | 179,038,633 | 179,038,772 | 139    | Loss |
| DEL00010835 | chr1 | 179,320,402 | 179,320,820 | 418    | Loss |
| DEL00010836 | chr1 | 179,353,411 | 179,354,999 | 1,588  | Loss |
| DEL00010839 | chr1 | 179,388,215 | 179,389,579 | 1,364  | Loss |
| DEL00010848 | chr1 | 179,667,894 | 179,668,130 | 236    | Loss |
| DEL00010849 | chr1 | 179,670,668 | 179,671,098 | 430    | Loss |
| DEL00010856 | chr1 | 179,719,139 | 179,719,288 | 149    | Loss |
| DEL00010858 | chr1 | 179,758,617 | 179,758,672 | 55     | Loss |
| DEL00010862 | chr1 | 179,789,877 | 179,790,837 | 960    | Loss |
| DEL00010868 | chr1 | 179,881,322 | 179,881,401 | 79     | Loss |
| DEL00010870 | chr1 | 179,920,716 | 179,920,790 | 74     | Loss |
| DEL00010872 | chr1 | 179,963,153 | 179,963,238 | 85     | Loss |
| DEL00010875 | chr1 | 179,990,560 | 179,991,117 | 557    | Loss |
| DEL00010877 | chr1 | 180,035,372 | 180,036,008 | 636    | Loss |
| DEL00010884 | chr1 | 180,170,252 | 180,170,755 | 503    | Loss |
| DEL00010886 | chr1 | 180,177,778 | 180,177,886 | 108    | Loss |
| DEL00010888 | chr1 | 180,201,592 | 180,202,086 | 494    | Loss |
| DEL00010893 | chr1 | 180,267,569 | 180,267,671 | 102    | Loss |
| DEL00010899 | chr1 | 180,556,167 | 180,556,251 | 84     | Loss |
| DEL00010903 | chr1 | 180,697,280 | 180,697,381 | 101    | Loss |
| DEL00010904 | chr1 | 180,731,990 | 180,732,080 | 90     | Loss |
| DEL00010906 | chr1 | 180,794,344 | 180,794,412 | 68     | Loss |
| DUP00010910 | chr1 | 180,845,501 | 180,864,403 | 18,902 | Gain |
| DEL00010912 | chr1 | 180,871,301 | 180,872,257 | 956    | Loss |
| DEL00010925 | chr1 | 181,079,406 | 181,079,465 | 59     | Loss |
| DEL00010928 | chr1 | 181,131,046 | 181,131,306 | 260    | Loss |
| DEL00010936 | chr1 | 181,315,626 | 181,319,019 | 3,393  | Loss |
| DEL00010937 | chr1 | 181,319,970 | 181,320,177 | 207    | Loss |
| DEL00010939 | chr1 | 181,357,561 | 181,358,134 | 573    | Loss |
| DUP00010943 | chr1 | 181,388,840 | 181,406,357 | 17,517 | Gain |
| DEL00010944 | chr1 | 181,411,753 | 181,411,937 | 184    | Loss |
| DUP00010948 | chr1 | 181,431,303 | 181,431,487 | 184    | Gain |
| DEL00010949 | chr1 | 181,457,264 | 181,457,318 | 54     | Loss |
| DEL00010954 | chr1 | 181,535,083 | 181,535,282 | 199    | Loss |
| DEL00010955 | chr1 | 181,609,504 | 181,609,594 | 90     | Loss |

|             |      |             |             |        |      |
|-------------|------|-------------|-------------|--------|------|
| DEL00010956 | chr1 | 181,615,999 | 181,618,217 | 2,218  | Loss |
| DEL00010963 | chr1 | 181,789,482 | 181,789,759 | 277    | Loss |
| DEL00010965 | chr1 | 181,811,465 | 181,811,706 | 241    | Loss |
| DEL00010966 | chr1 | 181,821,174 | 181,821,270 | 96     | Loss |
| DEL00010967 | chr1 | 181,832,658 | 181,833,108 | 450    | Loss |
| DEL00010973 | chr1 | 181,896,505 | 181,897,035 | 530    | Loss |
| DEL00010982 | chr1 | 182,161,371 | 182,162,300 | 929    | Loss |
| DEL00010983 | chr1 | 182,193,586 | 182,193,651 | 65     | Loss |
| DEL00010986 | chr1 | 182,211,196 | 182,211,317 | 121    | Loss |
| DEL00010987 | chr1 | 182,219,235 | 182,220,457 | 1,222  | Loss |
| DEL00010991 | chr1 | 182,330,019 | 182,330,230 | 211    | Loss |
| DEL00010992 | chr1 | 182,335,149 | 182,335,656 | 507    | Loss |
| DEL00011000 | chr1 | 182,413,052 | 182,414,327 | 1,275  | Loss |
| DEL00011005 | chr1 | 182,554,732 | 182,555,132 | 400    | Loss |
| DEL00011012 | chr1 | 182,623,985 | 182,624,204 | 219    | Loss |
| DEL00011013 | chr1 | 182,644,316 | 182,644,596 | 280    | Loss |
| DEL00011023 | chr1 | 182,759,865 | 182,763,039 | 3,174  | Loss |
| DEL00011025 | chr1 | 182,796,249 | 182,796,636 | 387    | Loss |
| DEL00011031 | chr1 | 182,915,556 | 182,916,013 | 457    | Loss |
| DEL00011035 | chr1 | 183,054,384 | 183,054,476 | 92     | Loss |
| DEL00011038 | chr1 | 183,115,522 | 183,115,731 | 209    | Loss |
| DEL00011039 | chr1 | 183,116,173 | 183,116,264 | 91     | Loss |
| DEL00011044 | chr1 | 183,184,900 | 183,185,257 | 357    | Loss |
| DEL00011053 | chr1 | 183,308,797 | 183,308,862 | 65     | Loss |
| DUP00011054 | chr1 | 183,317,610 | 183,332,700 | 15,090 | Gain |
| DEL00011061 | chr1 | 183,447,374 | 183,447,640 | 266    | Loss |
| DEL00011070 | chr1 | 183,764,716 | 183,764,857 | 141    | Loss |
| DEL00011071 | chr1 | 183,784,969 | 183,785,430 | 461    | Loss |
| DUP00011074 | chr1 | 183,830,803 | 183,831,345 | 542    | Gain |
| DEL00011078 | chr1 | 183,874,923 | 183,875,012 | 89     | Loss |
| DEL00011080 | chr1 | 183,906,545 | 183,909,942 | 3,397  | Loss |
| DEL00011083 | chr1 | 183,957,789 | 183,958,180 | 391    | Loss |
| DEL00011086 | chr1 | 183,984,310 | 183,984,769 | 459    | Loss |
| DEL00011090 | chr1 | 184,086,740 | 184,086,839 | 99     | Loss |
| DEL00011094 | chr1 | 184,243,549 | 184,248,573 | 5,024  | Loss |
| DEL00011098 | chr1 | 184,367,881 | 184,368,254 | 373    | Loss |
| DEL00011100 | chr1 | 184,395,708 | 184,395,830 | 122    | Loss |
| DEL00011101 | chr1 | 184,420,885 | 184,423,944 | 3,059  | Loss |
| DEL00011103 | chr1 | 184,483,072 | 184,483,151 | 79     | Loss |
| DEL00011104 | chr1 | 184,510,761 | 184,513,191 | 2,430  | Loss |
| DEL00011105 | chr1 | 184,539,198 | 184,539,322 | 124    | Loss |
| DEL00011106 | chr1 | 184,551,504 | 184,552,242 | 738    | Loss |
| DEL00011107 | chr1 | 184,553,623 | 184,553,693 | 70     | Loss |
| DEL00011108 | chr1 | 184,578,789 | 184,578,980 | 191    | Loss |
| DEL00011109 | chr1 | 184,605,990 | 184,607,497 | 1,507  | Loss |
| DEL00011116 | chr1 | 184,631,189 | 184,631,932 | 743    | Loss |
| DEL00011117 | chr1 | 184,650,334 | 184,651,962 | 1,628  | Loss |
| DEL00011119 | chr1 | 184,672,249 | 184,672,420 | 171    | Loss |
| DEL00011121 | chr1 | 184,673,942 | 184,674,243 | 301    | Loss |



|             |      |             |             |        |      |
|-------------|------|-------------|-------------|--------|------|
| DEL00011122 | chr1 | 184,748,897 | 184,749,208 | 311    | Loss |
| DEL00011123 | chr1 | 184,749,557 | 184,749,777 | 220    | Loss |
| DEL00011124 | chr1 | 184,760,954 | 184,761,208 | 254    | Loss |
| DEL00011129 | chr1 | 184,816,571 | 184,817,207 | 636    | Loss |
| DUP00011130 | chr1 | 184,823,659 | 184,837,413 | 13,754 | Gain |
| DEL00011134 | chr1 | 184,960,031 | 184,960,179 | 148    | Loss |
| DEL00011135 | chr1 | 184,988,138 | 184,988,901 | 763    | Loss |
| DEL00011136 | chr1 | 185,013,440 | 185,014,652 | 1,212  | Loss |
| DEL00011144 | chr1 | 185,205,557 | 185,205,892 | 335    | Loss |
| DEL00011147 | chr1 | 185,266,729 | 185,267,612 | 883    | Loss |
| DEL00011148 | chr1 | 185,272,158 | 185,273,212 | 1,054  | Loss |
| DEL00011149 | chr1 | 185,281,605 | 185,281,702 | 97     | Loss |
| DEL00011159 | chr1 | 185,350,825 | 185,351,028 | 203    | Loss |
| DEL00011160 | chr1 | 185,391,303 | 185,391,676 | 373    | Loss |
| DEL00011163 | chr1 | 185,408,696 | 185,408,943 | 247    | Loss |
| DEL00011164 | chr1 | 185,471,095 | 185,472,184 | 1,089  | Loss |
| DEL00011165 | chr1 | 185,492,316 | 185,492,463 | 147    | Loss |
| DEL00011171 | chr1 | 185,654,808 | 185,655,270 | 462    | Loss |
| DEL00011181 | chr1 | 185,853,245 | 185,853,328 | 83     | Loss |
| DEL00011182 | chr1 | 185,913,970 | 185,914,042 | 72     | Loss |
| DEL00011183 | chr1 | 185,960,891 | 185,961,001 | 110    | Loss |
| DEL00011184 | chr1 | 185,967,572 | 185,967,772 | 200    | Loss |
| DEL00011186 | chr1 | 186,058,444 | 186,058,658 | 214    | Loss |
| DEL00011189 | chr1 | 186,077,105 | 186,077,995 | 890    | Loss |
| DEL00011191 | chr1 | 186,088,962 | 186,089,060 | 98     | Loss |
| DEL00011194 | chr1 | 186,157,726 | 186,158,075 | 349    | Loss |
| DEL00011199 | chr1 | 186,248,524 | 186,248,704 | 180    | Loss |
| DEL00011206 | chr1 | 186,447,473 | 186,447,559 | 86     | Loss |
| DEL00011209 | chr1 | 186,491,437 | 186,495,427 | 3,990  | Loss |
| DEL00011214 | chr1 | 186,523,179 | 186,523,706 | 527    | Loss |
| DEL00011217 | chr1 | 186,602,510 | 186,602,583 | 73     | Loss |
| DEL00011219 | chr1 | 186,615,134 | 186,615,585 | 451    | Loss |
| DEL00011225 | chr1 | 186,756,348 | 186,756,615 | 267    | Loss |
| DEL00011231 | chr1 | 186,831,474 | 186,831,603 | 129    | Loss |
| DEL00011232 | chr1 | 186,832,221 | 186,832,332 | 111    | Loss |
| DEL00011235 | chr1 | 186,853,218 | 186,853,806 | 588    | Loss |
| DEL00011236 | chr1 | 186,864,579 | 186,864,955 | 376    | Loss |
| DEL00011240 | chr1 | 186,896,033 | 186,896,107 | 74     | Loss |
| DEL00011241 | chr1 | 186,905,051 | 186,905,104 | 53     | Loss |
| DEL00011242 | chr1 | 186,912,575 | 186,912,641 | 66     | Loss |
| DEL00011243 | chr1 | 186,923,715 | 186,924,602 | 887    | Loss |
| DEL00011245 | chr1 | 186,947,495 | 186,948,540 | 1,045  | Loss |
| DEL00011255 | chr1 | 187,135,113 | 187,135,361 | 248    | Loss |
| DEL00011257 | chr1 | 187,150,028 | 187,150,085 | 57     | Loss |
| DEL00011259 | chr1 | 187,177,775 | 187,178,100 | 325    | Loss |
| DEL00011260 | chr1 | 187,231,959 | 187,232,645 | 686    | Loss |
| DEL00011264 | chr1 | 187,384,913 | 187,385,032 | 119    | Loss |
| DEL00011270 | chr1 | 187,452,631 | 187,452,971 | 340    | Loss |
| DEL00011279 | chr1 | 187,486,699 | 187,486,837 | 138    | Loss |

|             |      |             |             |       |      |
|-------------|------|-------------|-------------|-------|------|
| DEL00011284 | chr1 | 187,523,652 | 187,523,776 | 124   | Loss |
| DEL00011288 | chr1 | 187,581,135 | 187,582,187 | 1,052 | Loss |
| DEL00011298 | chr1 | 187,643,422 | 187,649,263 | 5,841 | Loss |
| DEL00011299 | chr1 | 187,722,318 | 187,722,461 | 143   | Loss |
| DEL00011301 | chr1 | 187,764,103 | 187,764,378 | 275   | Loss |
| DEL00011304 | chr1 | 187,778,533 | 187,778,908 | 375   | Loss |
| DEL00011310 | chr1 | 187,867,765 | 187,868,154 | 389   | Loss |
| DEL00011314 | chr1 | 187,973,961 | 187,975,021 | 1,060 | Loss |
| DEL00011316 | chr1 | 188,026,892 | 188,027,025 | 133   | Loss |
| DEL00011346 | chr1 | 188,065,132 | 188,065,553 | 421   | Loss |
| DEL00011348 | chr1 | 188,071,590 | 188,071,672 | 82    | Loss |
| DUP00011351 | chr1 | 188,153,178 | 188,153,368 | 190   | Gain |
| DEL00011352 | chr1 | 188,154,731 | 188,155,176 | 445   | Loss |
| DEL00011357 | chr1 | 188,180,841 | 188,180,892 | 51    | Loss |
| DEL00011358 | chr1 | 188,221,802 | 188,222,356 | 554   | Loss |
| DEL00011362 | chr1 | 188,263,704 | 188,265,963 | 2,259 | Loss |
| DEL00011363 | chr1 | 188,303,073 | 188,303,166 | 93    | Loss |
| DEL00011367 | chr1 | 188,334,117 | 188,334,356 | 239   | Loss |
| DEL00011369 | chr1 | 188,405,743 | 188,406,779 | 1,036 | Loss |
| DEL00011372 | chr1 | 188,456,703 | 188,456,785 | 82    | Loss |
| DEL00011376 | chr1 | 188,510,507 | 188,511,391 | 884   | Loss |
| DEL00011377 | chr1 | 188,533,978 | 188,534,620 | 642   | Loss |
| DEL00011386 | chr1 | 188,690,359 | 188,690,900 | 541   | Loss |
| DEL00011388 | chr1 | 188,691,734 | 188,692,277 | 543   | Loss |
| DEL00011392 | chr1 | 188,726,572 | 188,726,642 | 70    | Loss |
| DEL00011398 | chr1 | 188,853,768 | 188,853,944 | 176   | Loss |
| DEL00011406 | chr1 | 188,952,853 | 188,953,025 | 172   | Loss |
| DEL00011408 | chr1 | 188,988,475 | 188,988,585 | 110   | Loss |
| DEL00011414 | chr1 | 189,129,648 | 189,129,728 | 80    | Loss |
| DEL00011418 | chr1 | 189,245,024 | 189,245,178 | 154   | Loss |
| DEL00011421 | chr1 | 189,429,797 | 189,431,048 | 1,251 | Loss |
| DEL00011424 | chr1 | 189,541,809 | 189,546,803 | 4,994 | Loss |
| DEL00011437 | chr1 | 189,843,081 | 189,843,653 | 572   | Loss |
| DEL00011438 | chr1 | 189,868,980 | 189,869,700 | 720   | Loss |
| DEL00011443 | chr1 | 190,001,219 | 190,001,386 | 167   | Loss |
| DEL00011446 | chr1 | 190,138,251 | 190,138,311 | 60    | Loss |
| DEL00011447 | chr1 | 190,149,363 | 190,149,428 | 65    | Loss |
| DEL00011450 | chr1 | 190,213,830 | 190,213,909 | 79    | Loss |
| DEL00011453 | chr1 | 190,241,725 | 190,241,911 | 186   | Loss |
| DEL00011455 | chr1 | 190,278,028 | 190,278,990 | 962   | Loss |
| DEL00011462 | chr1 | 190,442,953 | 190,443,010 | 57    | Loss |
| DEL00011468 | chr1 | 190,462,410 | 190,462,584 | 174   | Loss |
| DEL00011470 | chr1 | 190,491,569 | 190,492,133 | 564   | Loss |
| DEL00011472 | chr1 | 190,494,068 | 190,494,231 | 163   | Loss |
| DEL00011474 | chr1 | 190,589,128 | 190,589,619 | 491   | Loss |
| DEL00011476 | chr1 | 190,595,277 | 190,595,398 | 121   | Loss |
| DEL00011477 | chr1 | 190,610,541 | 190,611,493 | 952   | Loss |
| DEL00011483 | chr1 | 190,863,941 | 190,864,176 | 235   | Loss |
| DEL00011494 | chr1 | 191,085,283 | 191,086,205 | 922   | Loss |

|             |      |             |             |         |       |
|-------------|------|-------------|-------------|---------|-------|
| DEL00011497 | chr1 | 191,129,118 | 191,129,195 | 77      | Loss  |
| DEL00011500 | chr1 | 191,173,351 | 191,173,403 | 52      | Loss  |
| DEL00011502 | chr1 | 191,227,064 | 191,227,254 | 190     | Loss  |
| DEL00011508 | chr1 | 191,368,113 | 191,368,465 | 352     | Loss  |
| DEL00011509 | chr1 | 191,401,366 | 191,402,042 | 676     | Loss  |
| DEL00011512 | chr1 | 191,461,869 | 191,462,408 | 539     | Loss  |
| DEL00011514 | chr1 | 191,468,293 | 191,468,345 | 52      | Loss  |
| DEL00011517 | chr1 | 191,481,745 | 191,482,083 | 338     | Loss  |
| DEL00011520 | chr1 | 191,536,762 | 191,536,834 | 72      | Loss  |
| DEL00011523 | chr1 | 191,589,268 | 191,589,412 | 144     | Loss  |
| DEL00011526 | chr1 | 191,802,024 | 191,802,844 | 820     | Loss  |
| DEL00011528 | chr1 | 191,952,049 | 191,952,605 | 556     | Loss  |
| DEL00011532 | chr1 | 191,965,793 | 191,966,849 | 1,056   | Loss  |
| DEL00011533 | chr1 | 191,968,520 | 191,968,578 | 58      | Loss  |
| DEL00011534 | chr1 | 191,968,871 | 191,968,931 | 60      | Loss  |
| DEL00011535 | chr1 | 191,981,439 | 191,981,970 | 531     | Loss  |
| DEL00011540 | chr1 | 192,053,650 | 192,053,861 | 211     | Loss  |
| DEL00011541 | chr1 | 192,059,401 | 192,059,510 | 109     | Loss  |
| DEL00011542 | chr1 | 192,073,512 | 192,075,578 | 2,066   | Loss  |
| DEL00011543 | chr1 | 192,090,517 | 192,090,971 | 454     | Loss  |
| DEL00011544 | chr1 | 192,101,274 | 192,101,346 | 72      | Loss  |
| DEL00011545 | chr1 | 192,132,575 | 192,132,631 | 56      | Loss  |
| DEL00011546 | chr1 | 192,167,405 | 192,167,473 | 68      | Loss  |
| DEL00011547 | chr1 | 192,219,790 | 192,227,683 | 7,893   | Loss  |
| DEL00011554 | chr1 | 192,392,603 | 192,393,368 | 765     | Loss  |
| DEL00011555 | chr1 | 192,406,415 | 192,406,468 | 53      | Loss  |
| DEL00011556 | chr1 | 192,408,802 | 192,410,191 | 1,389   | Loss  |
| DEL00011561 | chr1 | 192,501,850 | 192,502,142 | 292     | Loss  |
| DEL00011569 | chr1 | 192,620,947 | 192,621,389 | 442     | Loss  |
| DEL00011572 | chr1 | 192,633,869 | 192,634,464 | 595     | Loss  |
| DEL00011577 | chr1 | 192,691,156 | 192,691,236 | 80      | Loss  |
| DEL00011587 | chr1 | 192,851,692 | 192,852,635 | 943     | Loss  |
| DEL00011591 | chr1 | 193,069,533 | 193,079,501 | 9,968   | Loss  |
| DEL00011593 | chr1 | 193,183,991 | 193,184,076 | 85      | Loss  |
| DEL00011596 | chr1 | 193,266,733 | 193,266,874 | 141     | Loss  |
| DEL00011598 | chr1 | 193,394,257 | 193,394,371 | 114     | Loss  |
| DEL00011616 | chr1 | 193,512,122 | 193,512,221 | 99      | Loss  |
| DEL00011622 | chr1 | 193,585,708 | 194,027,066 | 441,358 | Mixed |
| DEL00011650 | chr1 | 194,096,535 | 194,098,381 | 1,846   | Loss  |
| DEL00011651 | chr1 | 194,133,962 | 194,134,482 | 520     | Loss  |
| DEL00011652 | chr1 | 194,165,971 | 194,166,849 | 878     | Loss  |
| DEL00011655 | chr1 | 194,242,836 | 194,242,961 | 125     | Loss  |
| DEL00011660 | chr1 | 194,252,796 | 194,253,228 | 432     | Loss  |
| DEL00011663 | chr1 | 194,291,453 | 194,291,568 | 115     | Loss  |
| DEL00011669 | chr1 | 194,399,020 | 194,400,197 | 1,177   | Loss  |
| DEL00011670 | chr1 | 194,449,845 | 194,449,918 | 73      | Loss  |
| DEL00011674 | chr1 | 194,516,007 | 194,516,495 | 488     | Loss  |
| DEL00011676 | chr1 | 194,543,141 | 194,543,196 | 55      | Loss  |
| DEL00011679 | chr1 | 194,602,722 | 194,602,786 | 64      | Loss  |

|             |      |             |             |       |       |
|-------------|------|-------------|-------------|-------|-------|
| DEL00011680 | chr1 | 194,622,462 | 194,622,594 | 132   | Loss  |
| DEL00011684 | chr1 | 194,690,922 | 194,691,070 | 148   | Loss  |
| DEL00011685 | chr1 | 194,715,777 | 194,715,837 | 60    | Loss  |
| DEL00011690 | chr1 | 194,748,478 | 194,748,582 | 104   | Loss  |
| DEL00011693 | chr1 | 194,877,702 | 194,877,757 | 55    | Loss  |
| DEL00011696 | chr1 | 194,932,195 | 194,932,377 | 182   | Loss  |
| DEL00011698 | chr1 | 194,932,766 | 194,932,973 | 207   | Loss  |
| DEL00011713 | chr1 | 195,161,734 | 195,161,820 | 86    | Loss  |
| DEL00011725 | chr1 | 195,332,051 | 195,332,535 | 484   | Loss  |
| DEL00011727 | chr1 | 195,349,143 | 195,349,257 | 114   | Loss  |
| DEL00011728 | chr1 | 195,353,967 | 195,355,947 | 1,980 | Loss  |
| DEL00011746 | chr1 | 195,365,715 | 195,366,639 | 924   | Loss  |
| DEL00011787 | chr1 | 195,396,518 | 195,396,574 | 56    | Loss  |
| DEL00011798 | chr1 | 195,440,208 | 195,440,430 | 222   | Loss  |
| DEL00011827 | chr1 | 195,441,551 | 195,442,178 | 627   | Loss  |
| DEL00011834 | chr1 | 195,443,078 | 195,443,135 | 57    | Loss  |
| DEL00011836 | chr1 | 195,443,563 | 195,444,525 | 962   | Mixed |
| DUP00011882 | chr1 | 195,482,137 | 195,484,044 | 1,907 | Mixed |
| DEL00011933 | chr1 | 195,492,573 | 195,492,656 | 83    | Loss  |
| DEL00011935 | chr1 | 195,498,443 | 195,499,163 | 720   | Loss  |
| DEL00011992 | chr1 | 195,527,676 | 195,529,360 | 1,684 | Loss  |
| DEL00012197 | chr1 | 195,621,501 | 195,623,193 | 1,692 | Loss  |
| DUP00012236 | chr1 | 195,625,266 | 195,625,706 | 440   | Mixed |
| DEL00012255 | chr1 | 195,661,637 | 195,661,716 | 79    | Loss  |
| DUP00012263 | chr1 | 195,673,385 | 195,673,997 | 612   | Gain  |
| DEL00012271 | chr1 | 195,684,940 | 195,685,533 | 593   | Loss  |
| DEL00012299 | chr1 | 195,745,618 | 195,745,985 | 367   | Loss  |
| DEL00012305 | chr1 | 195,756,818 | 195,756,888 | 70    | Loss  |
| DEL00012307 | chr1 | 195,799,424 | 195,799,482 | 58    | Loss  |
| DUP00012380 | chr1 | 195,962,913 | 195,963,032 | 119   | Gain  |
| DEL00012381 | chr1 | 195,992,061 | 195,992,346 | 285   | Loss  |
| DEL00012405 | chr1 | 196,110,156 | 196,116,739 | 6,583 | Loss  |
| DEL00012414 | chr1 | 196,132,552 | 196,132,727 | 175   | Loss  |
| DEL00012463 | chr1 | 196,325,537 | 196,326,851 | 1,314 | Loss  |
| DUP00012478 | chr1 | 196,387,938 | 196,388,579 | 641   | Gain  |
| DEL00012484 | chr1 | 196,393,656 | 196,393,785 | 129   | Loss  |
| DEL00012492 | chr1 | 196,408,165 | 196,408,480 | 315   | Loss  |
| DEL00012499 | chr1 | 196,421,449 | 196,421,554 | 105   | Loss  |
| DUP00012509 | chr1 | 196,448,182 | 196,448,294 | 112   | Gain  |
| DUP00012510 | chr1 | 196,485,661 | 196,486,082 | 421   | Gain  |
| DEL00012515 | chr1 | 196,492,756 | 196,493,649 | 893   | Loss  |
| DUP00012520 | chr1 | 196,501,748 | 196,502,178 | 430   | Gain  |
| DEL00012534 | chr1 | 196,535,357 | 196,536,311 | 954   | Loss  |
| DEL00012544 | chr1 | 196,555,649 | 196,555,758 | 109   | Loss  |
| DEL00012553 | chr1 | 196,565,341 | 196,565,536 | 195   | Loss  |
| DEL00012599 | chr1 | 196,717,417 | 196,717,710 | 293   | Loss  |
| DEL00012613 | chr1 | 196,858,765 | 196,858,816 | 51    | Loss  |
| DEL00012614 | chr1 | 196,879,427 | 196,881,761 | 2,334 | Loss  |
| DEL00012615 | chr1 | 196,884,337 | 196,885,568 | 1,231 | Loss  |

|             |      |             |             |        |       |
|-------------|------|-------------|-------------|--------|-------|
| DUP00012618 | chr1 | 196,922,732 | 196,922,973 | 241    | Gain  |
| DUP00012641 | chr1 | 197,000,283 | 197,011,953 | 11,670 | Mixed |
| DEL00012687 | chr1 | 197,079,152 | 197,079,204 | 52     | Loss  |
| DEL00012689 | chr1 | 197,082,772 | 197,082,885 | 113    | Loss  |
| DUP00012694 | chr1 | 197,086,863 | 197,087,420 | 557    | Gain  |
| DEL00012703 | chr1 | 197,110,537 | 197,110,596 | 59     | Loss  |
| DUP00012712 | chr1 | 197,117,928 | 197,118,331 | 403    | Gain  |
| DEL00012719 | chr1 | 197,125,358 | 197,126,105 | 747    | Mixed |
| DUP00012733 | chr1 | 197,134,214 | 197,134,753 | 539    | Gain  |
| DEL00012758 | chr1 | 197,200,159 | 197,200,694 | 535    | Loss  |
| DUP00012774 | chr1 | 197,238,735 | 197,261,799 | 23,064 | Gain  |
| DEL00012792 | chr1 | 197,294,785 | 197,295,135 | 350    | Loss  |
| DEL00012797 | chr1 | 197,306,406 | 197,306,534 | 128    | Loss  |
| DEL00012803 | chr1 | 197,382,762 | 197,382,816 | 54     | Loss  |
| DEL00012805 | chr1 | 197,393,602 | 197,393,984 | 382    | Loss  |
| DUP00012806 | chr1 | 197,409,477 | 197,409,760 | 283    | Mixed |
| DUP00012814 | chr1 | 197,435,549 | 197,438,596 | 3,047  | Gain  |
| DEL00012835 | chr1 | 197,461,251 | 197,462,059 | 808    | Loss  |
| DEL00012843 | chr1 | 197,495,948 | 197,496,004 | 56     | Loss  |
| DEL00012850 | chr1 | 197,549,985 | 197,550,042 | 57     | Loss  |
| DEL00012871 | chr2 | 186,494     | 186,595     | 101    | Loss  |
| DEL00012896 | chr2 | 319,585     | 320,932     | 1,347  | Loss  |
| DEL00012946 | chr2 | 428,292     | 428,856     | 564    | Loss  |
| DUP00012947 | chr2 | 450,608     | 451,096     | 488    | Gain  |
| DEL00012949 | chr2 | 480,741     | 480,911     | 170    | Loss  |
| DEL00012958 | chr2 | 515,390     | 515,748     | 358    | Loss  |
| DEL00013010 | chr2 | 591,952     | 592,019     | 67     | Loss  |
| DEL00013027 | chr2 | 603,128     | 603,199     | 71     | Loss  |
| DEL00013045 | chr2 | 619,091     | 619,555     | 464    | Loss  |
| DEL00013063 | chr2 | 644,515     | 645,457     | 942    | Mixed |
| DEL00013110 | chr2 | 804,255     | 804,357     | 102    | Loss  |
| DUP00013136 | chr2 | 903,432     | 910,658     | 7,226  | Gain  |
| DEL00013147 | chr2 | 982,141     | 982,465     | 324    | Loss  |
| DEL00013149 | chr2 | 1,000,565   | 1,005,925   | 5,360  | Loss  |
| DEL00013150 | chr2 | 1,017,970   | 1,018,694   | 724    | Loss  |
| DEL00013154 | chr2 | 1,116,658   | 1,116,716   | 58     | Loss  |
| DEL00013165 | chr2 | 1,250,468   | 1,250,685   | 217    | Loss  |
| DEL00013170 | chr2 | 1,295,319   | 1,295,397   | 78     | Loss  |
| DEL00013171 | chr2 | 1,317,444   | 1,317,507   | 63     | Loss  |
| DEL00013176 | chr2 | 1,387,174   | 1,387,243   | 69     | Loss  |
| DEL00013178 | chr2 | 1,407,425   | 1,407,827   | 402    | Loss  |
| DEL00013179 | chr2 | 1,474,974   | 1,475,909   | 935    | Loss  |
| DEL00013184 | chr2 | 1,537,217   | 1,537,809   | 592    | Loss  |
| DUP00013193 | chr2 | 1,604,949   | 1,613,945   | 8,996  | Gain  |
| DEL00013209 | chr2 | 1,752,004   | 1,752,317   | 313    | Loss  |
| DEL00013213 | chr2 | 1,759,330   | 1,759,468   | 138    | Loss  |
| DEL00013225 | chr2 | 1,923,119   | 1,923,355   | 236    | Loss  |
| DUP00013227 | chr2 | 1,938,747   | 1,938,860   | 113    | Gain  |
| DEL00013229 | chr2 | 1,971,478   | 1,972,050   | 572    | Loss  |

|             |      |           |           |        |      |
|-------------|------|-----------|-----------|--------|------|
| DEL00013233 | chr2 | 2,085,046 | 2,085,530 | 484    | Loss |
| DUP00013242 | chr2 | 2,154,254 | 2,155,760 | 1,506  | Gain |
| DEL00013255 | chr2 | 2,287,365 | 2,287,492 | 127    | Loss |
| DEL00013270 | chr2 | 2,361,636 | 2,362,230 | 594    | Loss |
| DEL00013280 | chr2 | 2,538,182 | 2,538,420 | 238    | Loss |
| DEL00013284 | chr2 | 2,601,167 | 2,601,247 | 80     | Loss |
| DEL00013286 | chr2 | 2,614,004 | 2,614,237 | 233    | Loss |
| DEL00013299 | chr2 | 2,880,025 | 2,881,137 | 1,112  | Loss |
| DEL00013301 | chr2 | 2,960,642 | 2,960,790 | 148    | Loss |
| DEL00013310 | chr2 | 3,195,351 | 3,195,783 | 432    | Loss |
| DEL00013322 | chr2 | 3,328,288 | 3,328,646 | 358    | Loss |
| DEL00013324 | chr2 | 3,350,820 | 3,351,080 | 260    | Loss |
| DEL00013330 | chr2 | 3,393,912 | 3,393,969 | 57     | Loss |
| DEL00013343 | chr2 | 3,510,104 | 3,510,157 | 53     | Loss |
| DUP00013351 | chr2 | 3,797,111 | 3,797,221 | 110    | Gain |
| DEL00013354 | chr2 | 3,863,749 | 3,863,853 | 104    | Loss |
| DEL00013360 | chr2 | 4,038,911 | 4,039,012 | 101    | Loss |
| DEL00013367 | chr2 | 4,100,244 | 4,101,030 | 786    | Loss |
| DEL00013375 | chr2 | 4,206,764 | 4,207,121 | 357    | Loss |
| DEL00013377 | chr2 | 4,212,643 | 4,212,970 | 327    | Loss |
| DEL00013378 | chr2 | 4,222,022 | 4,223,691 | 1,669  | Loss |
| DEL00013386 | chr2 | 4,294,358 | 4,294,578 | 220    | Loss |
| DEL00013388 | chr2 | 4,331,007 | 4,331,353 | 346    | Loss |
| DEL00013395 | chr2 | 4,381,219 | 4,381,365 | 146    | Loss |
| DEL00013397 | chr2 | 4,447,435 | 4,447,619 | 184    | Loss |
| DEL00013399 | chr2 | 4,494,110 | 4,494,181 | 71     | Loss |
| DEL00013400 | chr2 | 4,499,235 | 4,499,755 | 520    | Loss |
| DEL00013402 | chr2 | 4,525,202 | 4,525,354 | 152    | Loss |
| DEL00013405 | chr2 | 4,594,234 | 4,594,418 | 184    | Loss |
| DEL00013408 | chr2 | 4,647,165 | 4,647,333 | 168    | Loss |
| DEL00013414 | chr2 | 4,792,141 | 4,805,863 | 13,722 | Loss |
| DEL00013415 | chr2 | 4,827,767 | 4,827,935 | 168    | Loss |
| DEL00013427 | chr2 | 4,914,063 | 4,914,114 | 51     | Loss |
| DEL00013435 | chr2 | 5,059,875 | 5,061,304 | 1,429  | Loss |
| DEL00013438 | chr2 | 5,147,654 | 5,147,727 | 73     | Loss |
| DEL00013445 | chr2 | 5,279,602 | 5,279,897 | 295    | Loss |
| DEL00013450 | chr2 | 5,364,429 | 5,364,501 | 72     | Loss |
| DEL00013453 | chr2 | 5,441,451 | 5,441,623 | 172    | Loss |
| DEL00013457 | chr2 | 5,581,439 | 5,581,735 | 296    | Loss |
| DEL00013459 | chr2 | 5,589,549 | 5,589,641 | 92     | Loss |
| DEL00013460 | chr2 | 5,605,136 | 5,605,212 | 76     | Loss |
| DUP00013461 | chr2 | 5,666,273 | 5,666,567 | 294    | Gain |
| DEL00013462 | chr2 | 5,764,900 | 5,765,399 | 499    | Loss |
| DEL00013466 | chr2 | 5,786,853 | 5,786,923 | 70     | Loss |
| DEL00013468 | chr2 | 5,827,259 | 5,827,535 | 276    | Loss |
| DEL00013474 | chr2 | 6,031,763 | 6,031,859 | 96     | Loss |
| DEL00013477 | chr2 | 6,125,215 | 6,125,381 | 166    | Loss |
| DEL00013478 | chr2 | 6,127,761 | 6,128,031 | 270    | Loss |
| DEL00013486 | chr2 | 6,218,586 | 6,218,637 | 51     | Loss |

|             |      |           |           |       |      |
|-------------|------|-----------|-----------|-------|------|
| DEL00013488 | chr2 | 6,275,251 | 6,275,822 | 571   | Loss |
| DEL00013489 | chr2 | 6,296,036 | 6,296,104 | 68    | Loss |
| DEL00013490 | chr2 | 6,298,408 | 6,298,555 | 147   | Loss |
| DEL00013493 | chr2 | 6,325,109 | 6,325,768 | 659   | Loss |
| DEL00013495 | chr2 | 6,342,791 | 6,342,872 | 81    | Loss |
| DEL00013496 | chr2 | 6,369,273 | 6,369,328 | 55    | Loss |
| DEL00013505 | chr2 | 6,513,741 | 6,513,801 | 60    | Loss |
| DEL00013507 | chr2 | 6,520,988 | 6,521,452 | 464   | Loss |
| DEL00013522 | chr2 | 6,639,793 | 6,639,877 | 84    | Loss |
| DEL00013526 | chr2 | 6,671,197 | 6,671,496 | 299   | Loss |
| DEL00013528 | chr2 | 6,729,304 | 6,729,393 | 89    | Loss |
| DEL00013531 | chr2 | 6,754,574 | 6,755,174 | 600   | Loss |
| DEL00013532 | chr2 | 6,787,249 | 6,787,538 | 289   | Loss |
| DEL00013538 | chr2 | 6,815,755 | 6,816,581 | 826   | Loss |
| DEL00013539 | chr2 | 6,827,593 | 6,827,775 | 182   | Loss |
| DEL00013541 | chr2 | 6,899,824 | 6,900,074 | 250   | Loss |
| DEL00013544 | chr2 | 6,967,732 | 6,967,817 | 85    | Loss |
| DEL00013545 | chr2 | 6,974,639 | 6,979,298 | 4,659 | Loss |
| DEL00013547 | chr2 | 7,000,428 | 7,000,521 | 93    | Loss |
| DEL00013551 | chr2 | 7,096,211 | 7,096,322 | 111   | Loss |
| DEL00013552 | chr2 | 7,119,655 | 7,119,731 | 76    | Loss |
| DEL00013555 | chr2 | 7,165,617 | 7,165,723 | 106   | Loss |
| DEL00013556 | chr2 | 7,172,000 | 7,174,332 | 2,332 | Loss |
| DEL00013558 | chr2 | 7,219,493 | 7,219,674 | 181   | Loss |
| DEL00013560 | chr2 | 7,293,491 | 7,294,010 | 519   | Loss |
| DEL00013573 | chr2 | 7,563,970 | 7,566,639 | 2,669 | Loss |
| DEL00013584 | chr2 | 7,701,594 | 7,701,922 | 328   | Loss |
| DEL00013586 | chr2 | 7,722,817 | 7,723,236 | 419   | Loss |
| DEL00013593 | chr2 | 7,914,676 | 7,914,790 | 114   | Loss |
| DEL00013598 | chr2 | 8,077,847 | 8,078,049 | 202   | Loss |
| DEL00013601 | chr2 | 8,165,079 | 8,166,205 | 1,126 | Loss |
| DEL00013604 | chr2 | 8,197,159 | 8,197,465 | 306   | Loss |
| DEL00013607 | chr2 | 8,238,388 | 8,238,445 | 57    | Loss |
| DEL00013611 | chr2 | 8,309,737 | 8,309,835 | 98    | Loss |
| DUP00013614 | chr2 | 8,310,692 | 8,310,788 | 96    | Gain |
| DEL00013615 | chr2 | 8,317,073 | 8,317,332 | 259   | Loss |
| DEL00013625 | chr2 | 8,558,026 | 8,558,081 | 55    | Loss |
| DEL00013626 | chr2 | 8,571,618 | 8,571,774 | 156   | Loss |
| DEL00013633 | chr2 | 8,698,381 | 8,698,472 | 91    | Loss |
| DEL00013634 | chr2 | 8,745,911 | 8,746,448 | 537   | Loss |
| DEL00013635 | chr2 | 8,779,435 | 8,779,523 | 88    | Loss |
| DEL00013645 | chr2 | 9,018,280 | 9,019,657 | 1,377 | Loss |
| DEL00013646 | chr2 | 9,038,816 | 9,038,893 | 77    | Loss |
| DEL00013649 | chr2 | 9,076,807 | 9,077,324 | 517   | Loss |
| DEL00013650 | chr2 | 9,141,188 | 9,147,538 | 6,350 | Loss |
| DEL00013651 | chr2 | 9,167,699 | 9,168,251 | 552   | Loss |
| DEL00013653 | chr2 | 9,262,379 | 9,262,445 | 66    | Loss |
| DEL00013654 | chr2 | 9,268,209 | 9,268,424 | 215   | Loss |
| DEL00013656 | chr2 | 9,311,647 | 9,312,540 | 893   | Loss |

|             |      |            |            |       |      |
|-------------|------|------------|------------|-------|------|
| DEL00013661 | chr2 | 9,378,780  | 9,378,888  | 108   | Loss |
| DEL00013662 | chr2 | 9,386,834  | 9,387,335  | 501   | Loss |
| DEL00013663 | chr2 | 9,388,040  | 9,388,121  | 81    | Loss |
| DEL00013665 | chr2 | 9,412,053  | 9,412,235  | 182   | Loss |
| DEL00013666 | chr2 | 9,413,870  | 9,413,968  | 98    | Loss |
| DEL00013668 | chr2 | 9,449,371  | 9,449,491  | 120   | Loss |
| DEL00013669 | chr2 | 9,461,239  | 9,461,592  | 353   | Loss |
| DEL00013670 | chr2 | 9,468,936  | 9,469,022  | 86    | Loss |
| DEL00013672 | chr2 | 9,480,048  | 9,480,876  | 828   | Loss |
| DEL00013678 | chr2 | 9,537,412  | 9,537,720  | 308   | Loss |
| DEL00013679 | chr2 | 9,550,854  | 9,551,405  | 551   | Loss |
| DEL00013685 | chr2 | 9,615,507  | 9,616,037  | 530   | Loss |
| DEL00013687 | chr2 | 9,670,926  | 9,671,079  | 153   | Loss |
| DEL00013688 | chr2 | 9,693,738  | 9,694,269  | 531   | Loss |
| DEL00013691 | chr2 | 9,767,269  | 9,767,421  | 152   | Loss |
| DEL00013698 | chr2 | 9,845,209  | 9,845,264  | 55    | Loss |
| DEL00013699 | chr2 | 9,847,725  | 9,851,478  | 3,753 | Loss |
| DEL00013709 | chr2 | 9,883,588  | 9,883,816  | 228   | Loss |
| DEL00013710 | chr2 | 9,935,228  | 9,935,505  | 277   | Loss |
| DEL00013711 | chr2 | 9,947,644  | 9,947,800  | 156   | Loss |
| DEL00013722 | chr2 | 10,138,475 | 10,138,567 | 92    | Loss |
| DEL00013723 | chr2 | 10,156,251 | 10,156,846 | 595   | Loss |
| DEL00013724 | chr2 | 10,199,764 | 10,199,820 | 56    | Loss |
| DEL00013725 | chr2 | 10,203,920 | 10,204,405 | 485   | Loss |
| DEL00013731 | chr2 | 10,343,137 | 10,343,260 | 123   | Loss |
| DEL00013734 | chr2 | 10,382,322 | 10,382,902 | 580   | Loss |
| DEL00013741 | chr2 | 10,445,978 | 10,446,081 | 103   | Loss |
| DEL00013742 | chr2 | 10,447,624 | 10,452,352 | 4,728 | Loss |
| DEL00013744 | chr2 | 10,518,550 | 10,519,149 | 599   | Loss |
| DEL00013745 | chr2 | 10,533,474 | 10,533,706 | 232   | Loss |
| DEL00013746 | chr2 | 10,576,174 | 10,576,595 | 421   | Loss |
| DEL00013749 | chr2 | 10,634,430 | 10,634,503 | 73    | Loss |
| DEL00013760 | chr2 | 10,824,605 | 10,824,826 | 221   | Loss |
| DEL00013764 | chr2 | 10,918,530 | 10,918,668 | 138   | Loss |
| DEL00013766 | chr2 | 10,924,030 | 10,924,522 | 492   | Loss |
| DEL00013772 | chr2 | 10,961,939 | 10,962,176 | 237   | Loss |
| DEL00013773 | chr2 | 10,972,750 | 10,974,254 | 1,504 | Loss |
| DEL00013782 | chr2 | 11,079,550 | 11,080,510 | 960   | Loss |
| DEL00013787 | chr2 | 11,141,336 | 11,141,405 | 69    | Loss |
| DEL00013789 | chr2 | 11,146,068 | 11,146,927 | 859   | Loss |
| DEL00013793 | chr2 | 11,232,667 | 11,232,831 | 164   | Loss |
| DEL00013798 | chr2 | 11,355,450 | 11,356,481 | 1,031 | Loss |
| DEL00013800 | chr2 | 11,363,396 | 11,363,736 | 340   | Loss |
| DEL00013801 | chr2 | 11,364,923 | 11,365,028 | 105   | Loss |
| DEL00013807 | chr2 | 11,547,330 | 11,551,244 | 3,914 | Loss |
| DEL00013812 | chr2 | 11,674,422 | 11,674,474 | 52    | Loss |
| DEL00013816 | chr2 | 11,747,137 | 11,749,412 | 2,275 | Loss |
| DEL00013820 | chr2 | 11,833,943 | 11,838,558 | 4,615 | Loss |
| DEL00013826 | chr2 | 11,973,871 | 11,973,936 | 65    | Loss |



|             |      |            |            |       |      |
|-------------|------|------------|------------|-------|------|
| DEL00013831 | chr2 | 12,062,872 | 12,064,339 | 1,467 | Loss |
| DEL00013836 | chr2 | 12,126,226 | 12,126,326 | 100   | Loss |
| DEL00013838 | chr2 | 12,196,976 | 12,197,195 | 219   | Loss |
| DEL00013839 | chr2 | 12,210,642 | 12,211,562 | 920   | Loss |
| DEL00013844 | chr2 | 12,279,965 | 12,281,013 | 1,048 | Loss |
| DEL00013845 | chr2 | 12,284,891 | 12,285,910 | 1,019 | Loss |
| DEL00013846 | chr2 | 12,289,315 | 12,289,391 | 76    | Loss |
| DEL00013851 | chr2 | 12,366,761 | 12,366,884 | 123   | Loss |
| DEL00013853 | chr2 | 12,395,739 | 12,395,905 | 166   | Loss |
| DEL00013857 | chr2 | 12,417,582 | 12,417,960 | 378   | Loss |
| DEL00013859 | chr2 | 12,463,466 | 12,463,542 | 76    | Loss |
| DEL00013871 | chr2 | 12,611,124 | 12,611,242 | 118   | Loss |
| DEL00013873 | chr2 | 12,629,992 | 12,630,758 | 766   | Loss |
| DEL00013875 | chr2 | 12,634,785 | 12,635,926 | 1,141 | Loss |
| DEL00013880 | chr2 | 12,739,704 | 12,739,789 | 85    | Loss |
| DEL00013891 | chr2 | 12,879,762 | 12,879,827 | 65    | Loss |
| DEL00013903 | chr2 | 13,103,903 | 13,104,123 | 220   | Loss |
| DEL00013906 | chr2 | 13,125,700 | 13,125,783 | 83    | Loss |
| DEL00013907 | chr2 | 13,141,878 | 13,142,324 | 446   | Loss |
| DEL00013908 | chr2 | 13,163,559 | 13,163,641 | 82    | Loss |
| DEL00013912 | chr2 | 13,186,968 | 13,187,019 | 51    | Loss |
| DEL00013913 | chr2 | 13,219,449 | 13,219,505 | 56    | Loss |
| DEL00013938 | chr2 | 13,760,743 | 13,760,851 | 108   | Loss |
| DEL00013940 | chr2 | 13,880,381 | 13,880,672 | 291   | Loss |
| DEL00013942 | chr2 | 14,004,423 | 14,004,533 | 110   | Loss |
| DEL00013951 | chr2 | 14,072,304 | 14,072,559 | 255   | Loss |
| DEL00013953 | chr2 | 14,084,404 | 14,084,558 | 154   | Loss |
| DEL00013958 | chr2 | 14,251,614 | 14,251,835 | 221   | Loss |
| DEL00013960 | chr2 | 14,272,016 | 14,272,430 | 414   | Loss |
| DEL00013976 | chr2 | 14,674,119 | 14,674,858 | 739   | Loss |
| DEL00013979 | chr2 | 14,699,020 | 14,699,099 | 79    | Loss |
| DEL00013985 | chr2 | 14,811,273 | 14,811,496 | 223   | Loss |
| DEL00013988 | chr2 | 14,883,651 | 14,883,726 | 75    | Loss |
| DEL00013991 | chr2 | 14,976,136 | 14,976,187 | 51    | Loss |
| DEL00013994 | chr2 | 14,982,518 | 14,983,035 | 517   | Loss |
| DEL00013995 | chr2 | 14,986,234 | 14,986,756 | 522   | Loss |
| DEL00014002 | chr2 | 15,149,901 | 15,150,097 | 196   | Loss |
| DEL00014013 | chr2 | 15,286,854 | 15,286,988 | 134   | Loss |
| DEL00014030 | chr2 | 15,593,323 | 15,593,455 | 132   | Loss |
| DEL00014043 | chr2 | 15,823,156 | 15,823,213 | 57    | Loss |
| DEL00014056 | chr2 | 15,947,975 | 15,948,036 | 61    | Loss |
| DEL00014058 | chr2 | 15,973,989 | 15,974,044 | 55    | Loss |
| DEL00014060 | chr2 | 16,069,906 | 16,069,960 | 54    | Loss |
| DEL00014062 | chr2 | 16,136,362 | 16,138,509 | 2,147 | Loss |
| DEL00014065 | chr2 | 16,164,602 | 16,164,692 | 90    | Loss |
| DEL00014066 | chr2 | 16,194,165 | 16,194,661 | 496   | Loss |
| DEL00014070 | chr2 | 16,224,715 | 16,224,948 | 233   | Loss |
| DEL00014075 | chr2 | 16,250,208 | 16,250,290 | 82    | Loss |
| DEL00014076 | chr2 | 16,257,685 | 16,257,740 | 55    | Loss |

|             |      |            |            |        |      |
|-------------|------|------------|------------|--------|------|
| DEL00014082 | chr2 | 16,387,905 | 16,387,999 | 94     | Loss |
| DEL00014085 | chr2 | 16,430,218 | 16,430,744 | 526    | Loss |
| DEL00014087 | chr2 | 16,467,647 | 16,468,987 | 1,340  | Loss |
| DEL00014092 | chr2 | 16,591,206 | 16,591,290 | 84     | Loss |
| DEL00014104 | chr2 | 16,719,481 | 16,719,556 | 75     | Loss |
| DEL00014105 | chr2 | 16,735,531 | 16,735,743 | 212    | Loss |
| DEL00014109 | chr2 | 17,002,601 | 17,002,777 | 176    | Loss |
| DEL00014111 | chr2 | 17,028,373 | 17,028,920 | 547    | Loss |
| DEL00014116 | chr2 | 17,189,503 | 17,189,573 | 70     | Loss |
| DEL00014119 | chr2 | 17,215,715 | 17,215,832 | 117    | Loss |
| DEL00014130 | chr2 | 17,458,575 | 17,458,885 | 310    | Loss |
| DUP00014138 | chr2 | 17,602,129 | 17,606,571 | 4,442  | Gain |
| DEL00014144 | chr2 | 17,713,837 | 17,714,055 | 218    | Loss |
| DEL00014147 | chr2 | 17,786,964 | 17,787,683 | 719    | Loss |
| DEL00014160 | chr2 | 17,983,134 | 17,983,187 | 53     | Loss |
| DEL00014161 | chr2 | 18,016,806 | 18,016,885 | 79     | Loss |
| DEL00014162 | chr2 | 18,027,293 | 18,027,646 | 353    | Loss |
| DEL00014165 | chr2 | 18,057,663 | 18,057,904 | 241    | Loss |
| DEL00014166 | chr2 | 18,083,379 | 18,087,419 | 4,040  | Loss |
| DEL00014167 | chr2 | 18,149,018 | 18,149,086 | 68     | Loss |
| DEL00014168 | chr2 | 18,192,326 | 18,192,404 | 78     | Loss |
| DEL00014173 | chr2 | 18,270,910 | 18,271,005 | 95     | Loss |
| DEL00014174 | chr2 | 18,274,904 | 18,278,109 | 3,205  | Loss |
| DEL00014179 | chr2 | 18,335,231 | 18,336,482 | 1,251  | Loss |
| DEL00014187 | chr2 | 18,560,008 | 18,560,088 | 80     | Loss |
| DEL00014188 | chr2 | 18,560,277 | 18,560,331 | 54     | Loss |
| DEL00014193 | chr2 | 18,644,094 | 18,645,423 | 1,329  | Loss |
| DEL00014200 | chr2 | 18,762,113 | 18,762,191 | 78     | Loss |
| DEL00014208 | chr2 | 18,915,205 | 18,915,309 | 104    | Loss |
| DUP00014214 | chr2 | 19,055,667 | 19,072,178 | 16,511 | Gain |
| DEL00014218 | chr2 | 19,147,822 | 19,149,582 | 1,760  | Loss |
| DEL00014225 | chr2 | 19,203,967 | 19,204,021 | 54     | Loss |
| DEL00014227 | chr2 | 19,217,683 | 19,217,823 | 140    | Loss |
| DEL00014229 | chr2 | 19,248,416 | 19,248,816 | 400    | Loss |
| DEL00014232 | chr2 | 19,280,623 | 19,281,229 | 606    | Loss |
| DEL00014241 | chr2 | 19,329,375 | 19,329,717 | 342    | Loss |
| DEL00014253 | chr2 | 19,530,135 | 19,530,299 | 164    | Loss |
| DEL00014263 | chr2 | 19,720,617 | 19,720,763 | 146    | Loss |
| DEL00014264 | chr2 | 19,754,587 | 19,754,658 | 71     | Loss |
| DEL00014267 | chr2 | 19,834,266 | 19,834,372 | 106    | Loss |
| DEL00014268 | chr2 | 19,834,671 | 19,835,298 | 627    | Loss |
| DEL00014271 | chr2 | 19,926,124 | 19,926,211 | 87     | Loss |
| DEL00014273 | chr2 | 19,936,868 | 19,937,075 | 207    | Loss |
| DEL00014276 | chr2 | 19,984,489 | 19,984,789 | 300    | Loss |
| DEL00014279 | chr2 | 20,052,811 | 20,052,943 | 132    | Loss |
| DEL00014283 | chr2 | 20,145,972 | 20,146,709 | 737    | Loss |
| DEL00014291 | chr2 | 20,226,854 | 20,227,728 | 874    | Loss |
| DEL00014293 | chr2 | 20,248,020 | 20,248,091 | 71     | Loss |
| DEL00014294 | chr2 | 20,270,025 | 20,270,208 | 183    | Loss |

|             |      |            |            |       |      |
|-------------|------|------------|------------|-------|------|
| DEL00014297 | chr2 | 20,296,727 | 20,296,792 | 65    | Loss |
| DEL00014302 | chr2 | 20,456,333 | 20,456,461 | 128   | Loss |
| DEL00014308 | chr2 | 20,672,783 | 20,673,439 | 656   | Loss |
| DEL00014310 | chr2 | 20,709,914 | 20,710,845 | 931   | Loss |
| DUP00014311 | chr2 | 20,720,323 | 20,720,943 | 620   | Gain |
| DEL00014313 | chr2 | 20,764,017 | 20,764,538 | 521   | Loss |
| DEL00014319 | chr2 | 20,882,129 | 20,882,591 | 462   | Loss |
| DEL00014320 | chr2 | 20,895,512 | 20,895,640 | 128   | Loss |
| DEL00014325 | chr2 | 21,012,678 | 21,012,921 | 243   | Loss |
| DEL00014326 | chr2 | 21,025,059 | 21,025,111 | 52    | Loss |
| DEL00014333 | chr2 | 21,155,260 | 21,155,695 | 435   | Loss |
| DEL00014334 | chr2 | 21,163,785 | 21,163,942 | 157   | Loss |
| DEL00014337 | chr2 | 21,189,550 | 21,192,914 | 3,364 | Loss |
| DEL00014338 | chr2 | 21,219,004 | 21,219,494 | 490   | Loss |
| DEL00014340 | chr2 | 21,250,649 | 21,250,751 | 102   | Loss |
| DEL00014344 | chr2 | 21,326,161 | 21,327,041 | 880   | Loss |
| DEL00014356 | chr2 | 21,484,110 | 21,484,183 | 73    | Loss |
| DEL00014357 | chr2 | 21,488,196 | 21,488,301 | 105   | Loss |
| DUP00014358 | chr2 | 21,509,961 | 21,510,050 | 89    | Gain |
| DUP00014359 | chr2 | 21,514,757 | 21,514,841 | 84    | Gain |
| DEL00014360 | chr2 | 21,536,055 | 21,536,178 | 123   | Loss |
| DEL00014363 | chr2 | 21,555,229 | 21,555,523 | 294   | Loss |
| DEL00014370 | chr2 | 21,782,483 | 21,782,657 | 174   | Loss |
| DEL00014376 | chr2 | 21,841,096 | 21,841,292 | 196   | Loss |
| DEL00014378 | chr2 | 21,916,436 | 21,916,498 | 62    | Loss |
| DEL00014382 | chr2 | 22,054,327 | 22,054,390 | 63    | Loss |
| DEL00014383 | chr2 | 22,066,680 | 22,066,932 | 252   | Loss |
| DEL00014386 | chr2 | 22,096,906 | 22,097,205 | 299   | Loss |
| DEL00014388 | chr2 | 22,099,141 | 22,099,234 | 93    | Loss |
| DUP00014389 | chr2 | 22,118,365 | 22,118,568 | 203   | Gain |
| DEL00014397 | chr2 | 22,334,211 | 22,334,285 | 74    | Loss |
| DEL00014399 | chr2 | 22,354,379 | 22,354,442 | 63    | Loss |
| DEL00014405 | chr2 | 22,480,747 | 22,480,877 | 130   | Loss |
| DEL00014410 | chr2 | 22,555,710 | 22,555,936 | 226   | Loss |
| DEL00014413 | chr2 | 22,765,797 | 22,766,486 | 689   | Loss |
| DEL00014416 | chr2 | 22,785,924 | 22,786,208 | 284   | Loss |
| DEL00014421 | chr2 | 22,865,447 | 22,865,548 | 101   | Loss |
| DEL00014426 | chr2 | 22,877,250 | 22,877,564 | 314   | Loss |
| DEL00014428 | chr2 | 22,919,242 | 22,919,414 | 172   | Loss |
| DEL00014432 | chr2 | 22,964,473 | 22,964,559 | 86    | Loss |
| DEL00014437 | chr2 | 23,030,544 | 23,030,667 | 123   | Loss |
| DEL00014438 | chr2 | 23,072,409 | 23,072,548 | 139   | Loss |
| DEL00014442 | chr2 | 23,147,958 | 23,148,044 | 86    | Loss |
| DEL00014445 | chr2 | 23,231,596 | 23,232,058 | 462   | Loss |
| DEL00014447 | chr2 | 23,280,250 | 23,280,420 | 170   | Loss |
| DEL00014454 | chr2 | 23,375,422 | 23,376,556 | 1,134 | Loss |
| DEL00014455 | chr2 | 23,387,314 | 23,387,393 | 79    | Loss |
| DEL00014464 | chr2 | 23,477,458 | 23,477,548 | 90    | Loss |
| DUP00014466 | chr2 | 23,567,055 | 23,567,131 | 76    | Gain |

|             |      |            |            |       |      |
|-------------|------|------------|------------|-------|------|
| DEL00014471 | chr2 | 23,708,238 | 23,709,617 | 1,379 | Loss |
| DEL00014476 | chr2 | 23,831,366 | 23,831,436 | 70    | Loss |
| DEL00014484 | chr2 | 24,081,487 | 24,081,551 | 64    | Loss |
| DEL00014485 | chr2 | 24,155,638 | 24,155,722 | 84    | Loss |
| DEL00014492 | chr2 | 24,397,731 | 24,398,101 | 370   | Loss |
| DEL00014493 | chr2 | 24,448,494 | 24,448,893 | 399   | Loss |
| DEL00014495 | chr2 | 24,482,054 | 24,482,107 | 53    | Loss |
| DEL00014507 | chr2 | 24,722,234 | 24,722,404 | 170   | Loss |
| DEL00014511 | chr2 | 24,746,007 | 24,746,199 | 192   | Loss |
| DEL00014512 | chr2 | 24,748,569 | 24,749,044 | 475   | Loss |
| DEL00014514 | chr2 | 24,752,222 | 24,752,522 | 300   | Loss |
| DEL00014515 | chr2 | 24,775,977 | 24,776,491 | 514   | Loss |
| DEL00014518 | chr2 | 24,808,990 | 24,809,100 | 110   | Loss |
| DEL00014523 | chr2 | 25,081,249 | 25,081,636 | 387   | Loss |
| DEL00014526 | chr2 | 25,098,537 | 25,098,626 | 89    | Loss |
| DEL00014533 | chr2 | 25,265,542 | 25,266,761 | 1,219 | Loss |
| DEL00014537 | chr2 | 25,353,447 | 25,353,622 | 175   | Loss |
| DEL00014542 | chr2 | 25,477,053 | 25,477,110 | 57    | Loss |
| DEL00014543 | chr2 | 25,477,169 | 25,477,729 | 560   | Loss |
| DEL00014544 | chr2 | 25,537,281 | 25,538,219 | 938   | Loss |
| DEL00014546 | chr2 | 25,545,349 | 25,545,648 | 299   | Loss |
| DEL00014555 | chr2 | 25,651,893 | 25,652,498 | 605   | Loss |
| DEL00014556 | chr2 | 25,689,029 | 25,689,629 | 600   | Loss |
| DEL00014557 | chr2 | 25,718,169 | 25,719,527 | 1,358 | Loss |
| DEL00014558 | chr2 | 25,744,979 | 25,746,729 | 1,750 | Loss |
| DEL00014562 | chr2 | 25,768,115 | 25,768,172 | 57    | Loss |
| DEL00014563 | chr2 | 25,796,504 | 25,796,568 | 64    | Loss |
| DEL00014564 | chr2 | 25,824,082 | 25,824,250 | 168   | Loss |
| DEL00014567 | chr2 | 25,852,644 | 25,853,203 | 559   | Loss |
| DEL00014574 | chr2 | 26,038,229 | 26,039,521 | 1,292 | Loss |
| DEL00014576 | chr2 | 26,116,458 | 26,116,528 | 70    | Loss |
| DEL00014580 | chr2 | 26,145,930 | 26,146,175 | 245   | Loss |
| DEL00014583 | chr2 | 26,206,283 | 26,206,969 | 686   | Loss |
| DEL00014587 | chr2 | 26,311,888 | 26,311,968 | 80    | Loss |
| DEL00014598 | chr2 | 26,597,510 | 26,597,728 | 218   | Loss |
| DEL00014602 | chr2 | 26,676,773 | 26,677,136 | 363   | Loss |
| DEL00014605 | chr2 | 26,730,853 | 26,730,963 | 110   | Loss |
| DEL00014606 | chr2 | 26,752,277 | 26,752,359 | 82    | Loss |
| DEL00014607 | chr2 | 26,818,382 | 26,819,412 | 1,030 | Loss |
| DEL00014609 | chr2 | 26,846,177 | 26,846,262 | 85    | Loss |
| DEL00014631 | chr2 | 27,333,399 | 27,333,635 | 236   | Loss |
| DEL00014636 | chr2 | 27,539,113 | 27,539,214 | 101   | Loss |
| DEL00014642 | chr2 | 27,571,822 | 27,571,953 | 131   | Loss |
| DEL00014646 | chr2 | 27,628,223 | 27,631,472 | 3,249 | Loss |
| DEL00014655 | chr2 | 27,954,796 | 27,955,412 | 616   | Loss |
| DEL00014660 | chr2 | 28,030,703 | 28,032,293 | 1,590 | Loss |
| DEL00014662 | chr2 | 28,096,191 | 28,098,412 | 2,221 | Loss |
| DEL00014663 | chr2 | 28,108,369 | 28,108,449 | 80    | Loss |
| DUP00014664 | chr2 | 28,132,529 | 28,132,665 | 136   | Gain |

|             |      |            |            |       |      |
|-------------|------|------------|------------|-------|------|
| DEL00014668 | chr2 | 28,162,094 | 28,163,512 | 1,418 | Loss |
| DEL00014669 | chr2 | 28,167,326 | 28,167,493 | 167   | Loss |
| DEL00014671 | chr2 | 28,169,770 | 28,170,216 | 446   | Loss |
| DEL00014683 | chr2 | 28,277,227 | 28,277,380 | 153   | Loss |
| DEL00014687 | chr2 | 28,328,403 | 28,328,515 | 112   | Loss |
| DEL00014692 | chr2 | 28,418,861 | 28,419,016 | 155   | Loss |
| DEL00014693 | chr2 | 28,443,350 | 28,443,454 | 104   | Loss |
| DEL00014702 | chr2 | 28,650,915 | 28,652,043 | 1,128 | Loss |
| DEL00014707 | chr2 | 28,783,595 | 28,784,213 | 618   | Loss |
| DEL00014714 | chr2 | 28,953,493 | 28,953,547 | 54    | Loss |
| DEL00014717 | chr2 | 28,990,025 | 28,990,626 | 601   | Loss |
| DEL00014718 | chr2 | 29,080,416 | 29,080,584 | 168   | Loss |
| DEL00014722 | chr2 | 29,151,936 | 29,152,047 | 111   | Loss |
| DEL00014723 | chr2 | 29,194,289 | 29,194,394 | 105   | Loss |
| DEL00014725 | chr2 | 29,258,750 | 29,258,898 | 148   | Loss |
| DEL00014726 | chr2 | 29,330,019 | 29,330,208 | 189   | Loss |
| DEL00014727 | chr2 | 29,330,785 | 29,332,528 | 1,743 | Loss |
| DEL00014730 | chr2 | 29,408,551 | 29,408,614 | 63    | Loss |
| DEL00014741 | chr2 | 29,677,270 | 29,677,869 | 599   | Loss |
| DEL00014746 | chr2 | 29,708,060 | 29,708,243 | 183   | Loss |
| DEL00014748 | chr2 | 29,785,287 | 29,785,486 | 199   | Loss |
| DEL00014754 | chr2 | 29,874,249 | 29,874,300 | 51    | Loss |
| DUP00014759 | chr2 | 29,961,690 | 29,961,872 | 182   | Gain |
| DEL00014760 | chr2 | 29,967,720 | 29,969,057 | 1,337 | Loss |
| DEL00014762 | chr2 | 30,061,559 | 30,061,704 | 145   | Loss |
| DEL00014765 | chr2 | 30,161,167 | 30,161,242 | 75    | Loss |
| DEL00014771 | chr2 | 30,215,878 | 30,215,937 | 59    | Loss |
| DEL00014773 | chr2 | 30,258,437 | 30,258,925 | 488   | Loss |
| DEL00014774 | chr2 | 30,265,843 | 30,265,984 | 141   | Loss |
| DEL00014778 | chr2 | 30,284,900 | 30,285,430 | 530   | Loss |
| DEL00014780 | chr2 | 30,401,723 | 30,401,849 | 126   | Loss |
| DEL00014789 | chr2 | 30,529,073 | 30,529,240 | 167   | Loss |
| DEL00014791 | chr2 | 30,587,103 | 30,587,653 | 550   | Loss |
| DEL00014792 | chr2 | 30,592,004 | 30,592,166 | 162   | Loss |
| DEL00014799 | chr2 | 30,635,188 | 30,635,974 | 786   | Loss |
| DEL00014802 | chr2 | 30,723,226 | 30,723,278 | 52    | Loss |
| DEL00014824 | chr2 | 31,027,934 | 31,028,039 | 105   | Loss |
| DEL00014825 | chr2 | 31,041,093 | 31,041,745 | 652   | Loss |
| DEL00014829 | chr2 | 31,129,829 | 31,130,136 | 307   | Loss |
| DEL00014841 | chr2 | 31,324,195 | 31,324,570 | 375   | Loss |
| DEL00014843 | chr2 | 31,365,635 | 31,366,163 | 528   | Loss |
| DEL00014844 | chr2 | 31,373,331 | 31,373,924 | 593   | Loss |
| DEL00014847 | chr2 | 31,499,796 | 31,499,949 | 153   | Loss |
| DEL00014849 | chr2 | 31,525,978 | 31,526,750 | 772   | Loss |
| DEL00014859 | chr2 | 31,619,592 | 31,619,918 | 326   | Loss |
| DEL00014864 | chr2 | 31,749,313 | 31,749,420 | 107   | Loss |
| DEL00014870 | chr2 | 31,991,255 | 31,991,469 | 214   | Loss |
| DEL00014871 | chr2 | 31,999,474 | 31,999,686 | 212   | Loss |
| DEL00014882 | chr2 | 32,308,186 | 32,308,266 | 80    | Loss |

|             |      |            |            |        |      |
|-------------|------|------------|------------|--------|------|
| DEL00014884 | chr2 | 32,381,457 | 32,381,709 | 252    | Loss |
| DEL00014899 | chr2 | 32,563,753 | 32,563,807 | 54     | Loss |
| DEL00014902 | chr2 | 32,580,914 | 32,580,968 | 54     | Loss |
| DEL00014912 | chr2 | 32,761,702 | 32,761,848 | 146    | Loss |
| DEL00014916 | chr2 | 32,853,514 | 32,854,014 | 500    | Loss |
| DEL00014917 | chr2 | 32,878,525 | 32,878,673 | 148    | Loss |
| DEL00014918 | chr2 | 32,919,829 | 32,920,375 | 546    | Loss |
| DEL00014928 | chr2 | 33,138,550 | 33,139,027 | 477    | Loss |
| DEL00014932 | chr2 | 33,211,602 | 33,211,665 | 63     | Loss |
| DEL00014933 | chr2 | 33,216,515 | 33,216,647 | 132    | Loss |
| DEL00014941 | chr2 | 33,322,454 | 33,323,616 | 1,162  | Loss |
| DEL00014952 | chr2 | 33,666,245 | 33,666,326 | 81     | Loss |
| DEL00014959 | chr2 | 33,826,997 | 33,829,301 | 2,304  | Loss |
| DEL00014965 | chr2 | 34,036,251 | 34,036,374 | 123    | Loss |
| DEL00014968 | chr2 | 34,108,200 | 34,108,544 | 344    | Loss |
| DEL00014970 | chr2 | 34,108,683 | 34,108,738 | 55     | Loss |
| DEL00014971 | chr2 | 34,129,462 | 34,129,531 | 69     | Loss |
| DEL00014976 | chr2 | 34,175,586 | 34,175,681 | 95     | Loss |
| DEL00014977 | chr2 | 34,214,413 | 34,214,844 | 431    | Loss |
| DEL00014978 | chr2 | 34,253,522 | 34,253,645 | 123    | Loss |
| DEL00014980 | chr2 | 34,275,329 | 34,275,766 | 437    | Loss |
| DEL00014983 | chr2 | 34,345,211 | 34,345,644 | 433    | Loss |
| DEL00014985 | chr2 | 34,380,489 | 34,380,545 | 56     | Loss |
| DEL00014989 | chr2 | 34,439,206 | 34,439,558 | 352    | Loss |
| DEL00014999 | chr2 | 34,729,087 | 34,729,256 | 169    | Loss |
| DEL00015003 | chr2 | 34,898,365 | 34,898,475 | 110    | Loss |
| DEL00015008 | chr2 | 35,145,326 | 35,145,754 | 428    | Loss |
| DUP00015010 | chr2 | 35,163,651 | 35,181,458 | 17,807 | Gain |
| DEL00015011 | chr2 | 35,187,614 | 35,198,818 | 11,204 | Loss |
| DEL00015012 | chr2 | 35,226,155 | 35,226,379 | 224    | Loss |
| DEL00015013 | chr2 | 35,236,585 | 35,236,647 | 62     | Loss |
| DEL00015017 | chr2 | 35,406,158 | 35,406,244 | 86     | Loss |
| DEL00015021 | chr2 | 35,519,401 | 35,520,310 | 909    | Loss |
| DEL00015024 | chr2 | 35,634,517 | 35,634,581 | 64     | Loss |
| DEL00015026 | chr2 | 35,666,652 | 35,666,746 | 94     | Loss |
| DEL00015031 | chr2 | 35,760,220 | 35,760,274 | 54     | Loss |
| DEL00015033 | chr2 | 35,814,555 | 35,815,549 | 994    | Loss |
| DEL00015038 | chr2 | 35,879,754 | 35,880,089 | 335    | Loss |
| DEL00015040 | chr2 | 35,884,500 | 35,885,869 | 1,369  | Loss |
| DEL00015044 | chr2 | 35,958,908 | 35,959,742 | 834    | Loss |
| DEL00015045 | chr2 | 35,972,634 | 35,973,093 | 459    | Loss |
| DEL00015047 | chr2 | 35,978,351 | 35,978,412 | 61     | Loss |
| DEL00015051 | chr2 | 36,036,416 | 36,036,759 | 343    | Loss |
| DEL00015053 | chr2 | 36,060,586 | 36,060,707 | 121    | Loss |
| DEL00015054 | chr2 | 36,138,325 | 36,138,572 | 247    | Loss |
| DEL00015056 | chr2 | 36,139,340 | 36,145,685 | 6,345  | Loss |
| DEL00015058 | chr2 | 36,174,505 | 36,174,599 | 94     | Loss |
| DEL00015064 | chr2 | 36,354,233 | 36,367,802 | 13,569 | Loss |
| DUP00015066 | chr2 | 36,392,506 | 36,392,633 | 127    | Gain |

|             |      |            |            |       |      |
|-------------|------|------------|------------|-------|------|
| DEL00015072 | chr2 | 36,459,120 | 36,459,321 | 201   | Loss |
| DEL00015073 | chr2 | 36,500,559 | 36,501,983 | 1,424 | Loss |
| DEL00015075 | chr2 | 36,506,612 | 36,506,896 | 284   | Loss |
| DEL00015076 | chr2 | 36,585,082 | 36,585,274 | 192   | Loss |
| DEL00015077 | chr2 | 36,612,600 | 36,617,999 | 5,399 | Loss |
| DEL00015081 | chr2 | 36,655,479 | 36,655,869 | 390   | Loss |
| DEL00015084 | chr2 | 36,786,153 | 36,786,427 | 274   | Loss |
| DEL00015088 | chr2 | 36,884,359 | 36,884,618 | 259   | Loss |
| DEL00015092 | chr2 | 36,930,034 | 36,930,169 | 135   | Loss |
| DEL00015093 | chr2 | 36,961,571 | 36,961,797 | 226   | Loss |
| DEL00015095 | chr2 | 37,017,660 | 37,017,717 | 57    | Loss |
| DEL00015106 | chr2 | 37,377,688 | 37,377,739 | 51    | Loss |
| DEL00015107 | chr2 | 37,392,931 | 37,393,170 | 239   | Loss |
| DEL00015110 | chr2 | 37,446,978 | 37,447,098 | 120   | Loss |
| DEL00015113 | chr2 | 37,475,806 | 37,475,877 | 71    | Loss |
| DEL00015118 | chr2 | 37,550,466 | 37,551,298 | 832   | Loss |
| DEL00015126 | chr2 | 37,744,424 | 37,744,534 | 110   | Loss |
| DEL00015131 | chr2 | 37,807,448 | 37,809,539 | 2,091 | Loss |
| DEL00015140 | chr2 | 38,029,683 | 38,030,344 | 661   | Loss |
| DEL00015141 | chr2 | 38,082,126 | 38,083,605 | 1,479 | Loss |
| DEL00015158 | chr2 | 38,320,090 | 38,320,154 | 64    | Loss |
| DEL00015160 | chr2 | 38,371,666 | 38,371,774 | 108   | Loss |
| DEL00015161 | chr2 | 38,382,062 | 38,382,312 | 250   | Loss |
| DEL00015164 | chr2 | 38,507,968 | 38,508,778 | 810   | Loss |
| DEL00015167 | chr2 | 38,566,073 | 38,566,131 | 58    | Loss |
| DEL00015168 | chr2 | 38,586,287 | 38,586,356 | 69    | Loss |
| DEL00015180 | chr2 | 38,745,277 | 38,745,988 | 711   | Loss |
| DEL00015181 | chr2 | 38,768,572 | 38,768,626 | 54    | Loss |
| DEL00015184 | chr2 | 38,794,202 | 38,794,253 | 51    | Loss |
| DEL00015189 | chr2 | 38,930,031 | 38,930,154 | 123   | Loss |
| DEL00015190 | chr2 | 38,971,332 | 38,971,558 | 226   | Loss |
| DEL00015192 | chr2 | 39,129,127 | 39,129,913 | 786   | Loss |
| DEL00015196 | chr2 | 39,217,560 | 39,217,795 | 235   | Loss |
| DEL00015199 | chr2 | 39,259,927 | 39,260,145 | 218   | Loss |
| DEL00015205 | chr2 | 39,362,349 | 39,362,502 | 153   | Loss |
| DEL00015220 | chr2 | 39,591,729 | 39,592,320 | 591   | Loss |
| DEL00015221 | chr2 | 39,605,500 | 39,605,579 | 79    | Loss |
| DEL00015223 | chr2 | 39,606,917 | 39,607,482 | 565   | Loss |
| DEL00015229 | chr2 | 39,744,151 | 39,744,462 | 311   | Loss |
| DEL00015230 | chr2 | 39,838,971 | 39,839,064 | 93    | Loss |
| DEL00015235 | chr2 | 40,038,775 | 40,039,149 | 374   | Loss |
| DEL00015236 | chr2 | 40,100,818 | 40,100,878 | 60    | Loss |
| DEL00015330 | chr2 | 40,546,736 | 40,547,560 | 824   | Loss |
| DEL00015332 | chr2 | 40,579,539 | 40,579,606 | 67    | Loss |
| DEL00015336 | chr2 | 40,602,126 | 40,602,184 | 58    | Loss |
| DEL00015339 | chr2 | 40,620,352 | 40,620,555 | 203   | Loss |
| DEL00015343 | chr2 | 40,679,069 | 40,679,450 | 381   | Loss |
| DEL00015344 | chr2 | 40,679,476 | 40,680,111 | 635   | Loss |
| DEL00015346 | chr2 | 40,827,591 | 40,827,899 | 308   | Loss |

|             |      |            |            |       |      |
|-------------|------|------------|------------|-------|------|
| DEL00015353 | chr2 | 40,901,456 | 40,902,049 | 593   | Loss |
| DEL00015354 | chr2 | 40,921,242 | 40,921,311 | 69    | Loss |
| DEL00015361 | chr2 | 41,096,346 | 41,096,619 | 273   | Loss |
| DEL00015362 | chr2 | 41,100,632 | 41,101,067 | 435   | Loss |
| DEL00015366 | chr2 | 41,217,727 | 41,218,236 | 509   | Loss |
| DEL00015372 | chr2 | 41,304,154 | 41,304,366 | 212   | Loss |
| DEL00015377 | chr2 | 41,385,104 | 41,385,233 | 129   | Loss |
| DEL00015381 | chr2 | 41,413,988 | 41,414,263 | 275   | Loss |
| DEL00015382 | chr2 | 41,418,117 | 41,418,595 | 478   | Loss |
| DEL00015383 | chr2 | 41,436,802 | 41,436,867 | 65    | Loss |
| DEL00015385 | chr2 | 41,457,712 | 41,458,313 | 601   | Loss |
| DEL00015386 | chr2 | 41,465,172 | 41,465,232 | 60    | Loss |
| DEL00015392 | chr2 | 41,615,635 | 41,616,215 | 580   | Loss |
| DEL00015393 | chr2 | 41,639,734 | 41,639,815 | 81    | Loss |
| DEL00015400 | chr2 | 41,676,538 | 41,677,263 | 725   | Loss |
| DUP00015403 | chr2 | 41,736,960 | 41,737,028 | 68    | Gain |
| DEL00015411 | chr2 | 41,870,069 | 41,879,624 | 9,555 | Loss |
| DEL00015417 | chr2 | 41,931,745 | 41,934,475 | 2,730 | Loss |
| DEL00015418 | chr2 | 41,980,316 | 41,980,367 | 51    | Loss |
| DEL00015419 | chr2 | 41,984,788 | 41,984,903 | 115   | Loss |
| DEL00015422 | chr2 | 42,049,090 | 42,050,442 | 1,352 | Loss |
| DEL00015425 | chr2 | 42,099,157 | 42,099,458 | 301   | Loss |
| DEL00015431 | chr2 | 42,161,306 | 42,161,611 | 305   | Loss |
| DEL00015434 | chr2 | 42,287,958 | 42,288,018 | 60    | Loss |
| DUP00015441 | chr2 | 42,548,107 | 42,548,177 | 70    | Gain |
| DEL00015443 | chr2 | 42,563,940 | 42,564,018 | 78    | Loss |
| DEL00015446 | chr2 | 42,735,664 | 42,736,060 | 396   | Loss |
| DEL00015449 | chr2 | 42,796,480 | 42,796,869 | 389   | Loss |
| DEL00015461 | chr2 | 42,933,578 | 42,933,882 | 304   | Loss |
| DEL00015462 | chr2 | 42,940,193 | 42,941,019 | 826   | Loss |
| DEL00015467 | chr2 | 42,961,888 | 42,961,978 | 90    | Loss |
| DEL00015471 | chr2 | 43,008,388 | 43,008,498 | 110   | Loss |
| DEL00015472 | chr2 | 43,014,195 | 43,014,272 | 77    | Loss |
| DEL00015479 | chr2 | 43,070,756 | 43,071,177 | 421   | Loss |
| DEL00015480 | chr2 | 43,124,325 | 43,125,124 | 799   | Loss |
| DEL00015482 | chr2 | 43,201,168 | 43,201,230 | 62    | Loss |
| DEL00015484 | chr2 | 43,258,288 | 43,258,386 | 98    | Loss |
| DEL00015492 | chr2 | 43,473,242 | 43,474,094 | 852   | Loss |
| DEL00015493 | chr2 | 43,519,414 | 43,519,561 | 147   | Loss |
| DEL00015495 | chr2 | 43,550,400 | 43,550,680 | 280   | Loss |
| DEL00015501 | chr2 | 43,649,573 | 43,650,639 | 1,066 | Loss |
| DEL00015504 | chr2 | 43,675,644 | 43,676,198 | 554   | Loss |
| DEL00015523 | chr2 | 43,922,562 | 43,922,869 | 307   | Loss |
| DEL00015524 | chr2 | 43,946,284 | 43,946,371 | 87    | Loss |
| DEL00015525 | chr2 | 43,970,921 | 43,971,608 | 687   | Loss |
| DEL00015526 | chr2 | 43,975,043 | 43,975,154 | 111   | Loss |
| DEL00015532 | chr2 | 44,043,395 | 44,043,478 | 83    | Loss |
| DEL00015533 | chr2 | 44,043,696 | 44,043,877 | 181   | Loss |
| DEL00015534 | chr2 | 44,049,724 | 44,050,338 | 614   | Loss |



|             |      |            |            |       |      |
|-------------|------|------------|------------|-------|------|
| DEL00015537 | chr2 | 44,071,590 | 44,071,725 | 135   | Loss |
| DEL00015540 | chr2 | 44,144,139 | 44,144,492 | 353   | Loss |
| DEL00015543 | chr2 | 44,219,845 | 44,220,636 | 791   | Loss |
| DEL00015546 | chr2 | 44,279,623 | 44,280,421 | 798   | Loss |
| DEL00015549 | chr2 | 44,341,909 | 44,342,296 | 387   | Loss |
| DEL00015559 | chr2 | 44,478,456 | 44,479,002 | 546   | Loss |
| DEL00015563 | chr2 | 44,561,179 | 44,561,296 | 117   | Loss |
| DEL00015573 | chr2 | 44,631,872 | 44,631,997 | 125   | Loss |
| DEL00015576 | chr2 | 44,699,058 | 44,699,182 | 124   | Loss |
| DEL00015583 | chr2 | 44,854,487 | 44,854,684 | 197   | Loss |
| DEL00015586 | chr2 | 44,916,103 | 44,916,179 | 76    | Loss |
| DEL00015587 | chr2 | 44,918,204 | 44,918,686 | 482   | Loss |
| DEL00015596 | chr2 | 44,994,125 | 44,994,296 | 171   | Loss |
| DEL00015597 | chr2 | 45,027,174 | 45,027,231 | 57    | Loss |
| DEL00015600 | chr2 | 45,038,943 | 45,039,442 | 499   | Loss |
| DEL00015602 | chr2 | 45,049,829 | 45,050,121 | 292   | Loss |
| DEL00015603 | chr2 | 45,051,300 | 45,051,401 | 101   | Loss |
| DEL00015604 | chr2 | 45,099,519 | 45,099,578 | 59    | Loss |
| DEL00015609 | chr2 | 45,143,520 | 45,143,578 | 58    | Loss |
| DEL00015623 | chr2 | 45,475,578 | 45,475,969 | 391   | Loss |
| DEL00015625 | chr2 | 45,517,921 | 45,521,734 | 3,813 | Loss |
| DEL00015637 | chr2 | 45,543,461 | 45,543,803 | 342   | Loss |
| DEL00015638 | chr2 | 45,547,882 | 45,548,496 | 614   | Loss |
| DEL00015643 | chr2 | 45,593,528 | 45,593,629 | 101   | Loss |
| DEL00015645 | chr2 | 45,607,597 | 45,608,006 | 409   | Loss |
| DEL00015647 | chr2 | 45,628,162 | 45,628,430 | 268   | Loss |
| DEL00015649 | chr2 | 45,720,386 | 45,720,471 | 85    | Loss |
| DEL00015651 | chr2 | 45,740,992 | 45,741,123 | 131   | Loss |
| DEL00015653 | chr2 | 45,744,586 | 45,744,775 | 189   | Loss |
| DUP00015662 | chr2 | 45,793,187 | 45,793,336 | 149   | Gain |
| DEL00015663 | chr2 | 45,820,177 | 45,820,632 | 455   | Loss |
| DEL00015668 | chr2 | 45,896,437 | 45,896,507 | 70    | Loss |
| DEL00015671 | chr2 | 45,953,944 | 45,954,117 | 173   | Loss |
| DEL00015672 | chr2 | 45,955,836 | 45,956,577 | 741   | Loss |
| DEL00015687 | chr2 | 46,094,441 | 46,094,519 | 78    | Loss |
| DEL00015688 | chr2 | 46,115,237 | 46,119,866 | 4,629 | Loss |
| DEL00015696 | chr2 | 46,209,926 | 46,210,518 | 592   | Loss |
| DEL00015698 | chr2 | 46,212,098 | 46,212,396 | 298   | Loss |
| DEL00015702 | chr2 | 46,297,944 | 46,298,001 | 57    | Loss |
| DEL00015707 | chr2 | 46,363,570 | 46,363,630 | 60    | Loss |
| DEL00015708 | chr2 | 46,437,337 | 46,437,398 | 61    | Loss |
| DEL00015710 | chr2 | 46,446,173 | 46,447,225 | 1,052 | Loss |
| DEL00015712 | chr2 | 46,485,343 | 46,485,454 | 111   | Loss |
| DEL00015713 | chr2 | 46,486,883 | 46,487,060 | 177   | Loss |
| DEL00015716 | chr2 | 46,578,199 | 46,578,364 | 165   | Loss |
| DEL00015722 | chr2 | 46,626,521 | 46,627,464 | 943   | Loss |
| DEL00015725 | chr2 | 46,645,502 | 46,646,069 | 567   | Loss |
| DEL00015726 | chr2 | 46,757,417 | 46,758,463 | 1,046 | Loss |
| DEL00015730 | chr2 | 46,818,078 | 46,819,249 | 1,171 | Loss |

|             |      |            |            |       |       |
|-------------|------|------------|------------|-------|-------|
| DEL00015735 | chr2 | 46,903,146 | 46,903,239 | 93    | Loss  |
| DEL00015749 | chr2 | 47,231,256 | 47,231,374 | 118   | Loss  |
| DEL00015750 | chr2 | 47,250,031 | 47,250,086 | 55    | Loss  |
| DEL00015761 | chr2 | 47,440,865 | 47,441,259 | 394   | Loss  |
| DEL00015773 | chr2 | 47,687,437 | 47,687,853 | 416   | Loss  |
| DEL00015776 | chr2 | 47,723,373 | 47,723,664 | 291   | Loss  |
| DEL00015782 | chr2 | 47,781,584 | 47,781,886 | 302   | Loss  |
| DEL00015786 | chr2 | 47,795,493 | 47,795,864 | 371   | Loss  |
| DEL00015788 | chr2 | 47,811,158 | 47,811,219 | 61    | Loss  |
| DEL00015792 | chr2 | 47,863,562 | 47,863,903 | 341   | Loss  |
| DEL00015824 | chr2 | 48,260,068 | 48,260,264 | 196   | Loss  |
| DEL00015825 | chr2 | 48,266,037 | 48,266,149 | 112   | Loss  |
| DEL00015826 | chr2 | 48,286,594 | 48,287,697 | 1,103 | Loss  |
| DEL00015846 | chr2 | 48,586,232 | 48,586,842 | 610   | Loss  |
| DEL00015849 | chr2 | 48,598,009 | 48,598,357 | 348   | Loss  |
| DEL00015858 | chr2 | 48,721,877 | 48,722,170 | 293   | Loss  |
| DEL00015859 | chr2 | 48,722,499 | 48,722,970 | 471   | Loss  |
| DEL00015862 | chr2 | 48,750,911 | 48,751,763 | 852   | Loss  |
| DEL00015863 | chr2 | 48,815,970 | 48,816,261 | 291   | Loss  |
| DEL00015869 | chr2 | 48,879,139 | 48,879,214 | 75    | Loss  |
| DEL00015873 | chr2 | 48,918,586 | 48,919,744 | 1,158 | Loss  |
| DEL00015974 | chr2 | 49,062,885 | 49,063,362 | 477   | Loss  |
| DEL00015976 | chr2 | 49,138,035 | 49,138,402 | 367   | Loss  |
| DEL00015977 | chr2 | 49,152,095 | 49,152,290 | 195   | Loss  |
| DEL00015979 | chr2 | 49,197,355 | 49,197,407 | 52    | Loss  |
| DEL00015980 | chr2 | 49,202,245 | 49,202,936 | 691   | Loss  |
| DEL00015983 | chr2 | 49,212,382 | 49,212,468 | 86    | Loss  |
| DEL00015987 | chr2 | 49,298,825 | 49,299,004 | 179   | Loss  |
| DEL00015991 | chr2 | 49,367,144 | 49,367,319 | 175   | Loss  |
| DEL00015992 | chr2 | 49,379,060 | 49,379,168 | 108   | Loss  |
| DEL00015994 | chr2 | 49,439,565 | 49,439,701 | 136   | Loss  |
| DEL00015998 | chr2 | 49,510,643 | 49,510,810 | 167   | Loss  |
| DUP00016010 | chr2 | 49,654,541 | 49,659,954 | 5,413 | Mixed |
| DEL00016012 | chr2 | 49,687,357 | 49,687,572 | 215   | Loss  |
| DEL00016014 | chr2 | 49,742,516 | 49,742,934 | 418   | Loss  |
| DEL00016018 | chr2 | 49,827,679 | 49,827,775 | 96    | Loss  |
| DEL00016026 | chr2 | 49,970,944 | 49,971,144 | 200   | Loss  |
| DEL00016029 | chr2 | 50,068,634 | 50,068,787 | 153   | Loss  |
| DEL00016030 | chr2 | 50,130,002 | 50,131,743 | 1,741 | Loss  |
| DEL00016032 | chr2 | 50,271,871 | 50,272,039 | 168   | Loss  |
| DEL00016038 | chr2 | 50,601,132 | 50,601,524 | 392   | Loss  |
| DEL00016051 | chr2 | 50,973,855 | 50,974,377 | 522   | Loss  |
| DEL00016052 | chr2 | 50,994,750 | 50,996,292 | 1,542 | Loss  |
| DEL00016058 | chr2 | 51,165,334 | 51,165,476 | 142   | Loss  |
| DEL00016059 | chr2 | 51,217,377 | 51,219,324 | 1,947 | Loss  |
| DUP00016062 | chr2 | 51,268,456 | 51,268,676 | 220   | Gain  |
| DEL00016065 | chr2 | 51,428,367 | 51,428,839 | 472   | Loss  |
| DEL00016066 | chr2 | 51,429,737 | 51,429,855 | 118   | Loss  |
| DEL00016072 | chr2 | 51,587,177 | 51,587,345 | 168   | Loss  |

|             |      |            |            |        |      |
|-------------|------|------------|------------|--------|------|
| DEL00016073 | chr2 | 51,587,380 | 51,587,661 | 281    | Loss |
| DEL00016086 | chr2 | 51,862,188 | 51,862,428 | 240    | Loss |
| DEL00016087 | chr2 | 51,907,684 | 51,907,847 | 163    | Loss |
| DEL00016089 | chr2 | 52,003,342 | 52,003,704 | 362    | Loss |
| DEL00016091 | chr2 | 52,057,776 | 52,057,828 | 52     | Loss |
| DEL00016095 | chr2 | 52,717,650 | 52,737,875 | 20,225 | Loss |
| DEL00016096 | chr2 | 52,749,830 | 52,762,862 | 13,032 | Loss |
| DEL00016102 | chr2 | 52,872,214 | 52,873,002 | 788    | Loss |
| DEL00016106 | chr2 | 52,998,618 | 53,001,688 | 3,070  | Loss |
| DEL00016121 | chr2 | 53,097,056 | 53,098,687 | 1,631  | Loss |
| DEL00016123 | chr2 | 53,102,128 | 53,102,471 | 343    | Loss |
| DEL00016141 | chr2 | 53,386,210 | 53,386,271 | 61     | Loss |
| DEL00016148 | chr2 | 53,616,133 | 53,616,184 | 51     | Loss |
| DEL00016165 | chr2 | 53,963,660 | 53,963,821 | 161    | Loss |
| DEL00016169 | chr2 | 54,024,168 | 54,024,317 | 149    | Loss |
| DEL00016170 | chr2 | 54,104,773 | 54,105,403 | 630    | Loss |
| DEL00016175 | chr2 | 54,161,733 | 54,163,941 | 2,208  | Loss |
| DEL00016176 | chr2 | 54,171,346 | 54,171,775 | 429    | Loss |
| DEL00016186 | chr2 | 54,232,313 | 54,233,334 | 1,021  | Loss |
| DEL00016188 | chr2 | 54,277,766 | 54,278,928 | 1,162  | Loss |
| DEL00016191 | chr2 | 54,337,977 | 54,338,053 | 76     | Loss |
| DEL00016192 | chr2 | 54,351,004 | 54,351,057 | 53     | Loss |
| DEL00016197 | chr2 | 54,388,398 | 54,391,192 | 2,794  | Loss |
| DEL00016199 | chr2 | 54,411,272 | 54,411,622 | 350    | Loss |
| DUP00016200 | chr2 | 54,415,966 | 54,416,159 | 193    | Gain |
| DEL00016211 | chr2 | 54,487,884 | 54,488,421 | 537    | Loss |
| DEL00016215 | chr2 | 54,547,956 | 54,548,516 | 560    | Loss |
| DEL00016223 | chr2 | 54,698,019 | 54,699,823 | 1,804  | Loss |
| DEL00016232 | chr2 | 54,835,199 | 54,836,690 | 1,491  | Loss |
| DEL00016233 | chr2 | 54,862,668 | 54,862,896 | 228    | Loss |
| DEL00016235 | chr2 | 54,872,350 | 54,872,863 | 513    | Loss |
| DEL00016256 | chr2 | 55,102,917 | 55,102,983 | 66     | Loss |
| DEL00016262 | chr2 | 55,113,536 | 55,114,082 | 546    | Loss |
| DEL00016268 | chr2 | 55,150,867 | 55,151,720 | 853    | Loss |
| DEL00016274 | chr2 | 55,160,152 | 55,160,485 | 333    | Loss |
| DEL00016278 | chr2 | 55,210,669 | 55,210,861 | 192    | Loss |
| DEL00016279 | chr2 | 55,217,869 | 55,219,408 | 1,539  | Loss |
| DEL00016288 | chr2 | 55,303,284 | 55,303,469 | 185    | Loss |
| DEL00016291 | chr2 | 55,364,567 | 55,364,783 | 216    | Loss |
| DEL00016294 | chr2 | 55,404,976 | 55,406,397 | 1,421  | Loss |
| DEL00016298 | chr2 | 55,443,296 | 55,443,837 | 541    | Loss |
| DEL00016301 | chr2 | 55,474,771 | 55,474,873 | 102    | Loss |
| DEL00016303 | chr2 | 55,506,256 | 55,506,327 | 71     | Loss |
| DEL00016307 | chr2 | 55,522,862 | 55,522,917 | 55     | Loss |
| DEL00016308 | chr2 | 55,544,770 | 55,544,898 | 128    | Loss |
| DEL00016310 | chr2 | 55,572,975 | 55,573,155 | 180    | Loss |
| DEL00016326 | chr2 | 55,667,525 | 55,668,946 | 1,421  | Loss |
| DEL00016328 | chr2 | 55,682,565 | 55,682,641 | 76     | Loss |
| DEL00016337 | chr2 | 55,730,271 | 55,730,325 | 54     | Loss |

|             |      |            |            |        |      |
|-------------|------|------------|------------|--------|------|
| DEL00016341 | chr2 | 55,812,008 | 55,812,159 | 151    | Loss |
| DEL00016344 | chr2 | 55,827,451 | 55,827,869 | 418    | Loss |
| DEL00016347 | chr2 | 55,879,443 | 55,881,013 | 1,570  | Loss |
| DEL00016350 | chr2 | 55,897,683 | 55,897,870 | 187    | Loss |
| DEL00016351 | chr2 | 55,954,296 | 55,954,368 | 72     | Loss |
| DEL00016353 | chr2 | 55,961,475 | 55,961,544 | 69     | Loss |
| DEL00016356 | chr2 | 56,058,920 | 56,059,066 | 146    | Loss |
| DUP00016378 | chr2 | 56,192,159 | 56,202,225 | 10,066 | Gain |
| DEL00016380 | chr2 | 56,213,010 | 56,214,506 | 1,496  | Loss |
| DEL00016385 | chr2 | 56,268,571 | 56,268,987 | 416    | Loss |
| DEL00016387 | chr2 | 56,288,771 | 56,288,878 | 107    | Loss |
| DEL00016388 | chr2 | 56,311,570 | 56,311,852 | 282    | Loss |
| DEL00016400 | chr2 | 56,418,273 | 56,418,487 | 214    | Loss |
| DEL00016406 | chr2 | 56,500,988 | 56,501,040 | 52     | Loss |
| DEL00016407 | chr2 | 56,542,042 | 56,542,346 | 304    | Loss |
| DEL00016410 | chr2 | 56,573,000 | 56,573,602 | 602    | Loss |
| DEL00016424 | chr2 | 56,836,114 | 56,836,172 | 58     | Loss |
| DEL00016431 | chr2 | 56,923,047 | 56,923,651 | 604    | Loss |
| DEL00016435 | chr2 | 57,099,740 | 57,099,883 | 143    | Loss |
| DEL00016436 | chr2 | 57,118,474 | 57,118,532 | 58     | Loss |
| DEL00016438 | chr2 | 57,133,947 | 57,135,227 | 1,280  | Loss |
| DEL00016440 | chr2 | 57,176,199 | 57,176,635 | 436    | Loss |
| DEL00016443 | chr2 | 57,222,677 | 57,223,136 | 459    | Loss |
| DEL00016455 | chr2 | 57,401,231 | 57,401,763 | 532    | Loss |
| DEL00016458 | chr2 | 57,498,712 | 57,498,877 | 165    | Loss |
| DEL00016459 | chr2 | 57,503,195 | 57,504,345 | 1,150  | Loss |
| DEL00016462 | chr2 | 57,586,516 | 57,586,623 | 107    | Loss |
| DEL00016468 | chr2 | 57,681,857 | 57,681,925 | 68     | Loss |
| DEL00016469 | chr2 | 57,687,712 | 57,687,782 | 70     | Loss |
| DEL00016479 | chr2 | 57,798,986 | 57,799,413 | 427    | Loss |
| DEL00016482 | chr2 | 57,806,064 | 57,806,218 | 154    | Loss |
| DEL00016491 | chr2 | 57,843,961 | 57,844,564 | 603    | Loss |
| DEL00016502 | chr2 | 57,929,298 | 57,931,741 | 2,443  | Loss |
| DEL00016513 | chr2 | 58,120,864 | 58,121,098 | 234    | Loss |
| DEL00016518 | chr2 | 58,191,628 | 58,191,682 | 54     | Loss |
| DEL00016519 | chr2 | 58,310,796 | 58,310,860 | 64     | Loss |
| DEL00016521 | chr2 | 58,325,513 | 58,326,257 | 744    | Loss |
| DEL00016522 | chr2 | 58,360,131 | 58,363,270 | 3,139  | Loss |
| DEL00016523 | chr2 | 58,390,231 | 58,391,901 | 1,670  | Loss |
| DEL00016527 | chr2 | 58,545,532 | 58,545,650 | 118    | Loss |
| DEL00016532 | chr2 | 58,648,689 | 58,648,868 | 179    | Loss |
| DEL00016533 | chr2 | 58,683,078 | 58,683,616 | 538    | Loss |
| DEL00016541 | chr2 | 58,782,727 | 58,784,035 | 1,308  | Loss |
| DEL00016554 | chr2 | 59,038,453 | 59,038,518 | 65     | Loss |
| DEL00016556 | chr2 | 59,044,677 | 59,046,096 | 1,419  | Loss |
| DEL00016557 | chr2 | 59,049,170 | 59,050,405 | 1,235  | Loss |
| DEL00016558 | chr2 | 59,052,138 | 59,053,348 | 1,210  | Loss |
| DEL00016560 | chr2 | 59,075,007 | 59,075,067 | 60     | Loss |
| DEL00016561 | chr2 | 59,102,296 | 59,103,254 | 958    | Loss |

|             |      |            |            |        |      |
|-------------|------|------------|------------|--------|------|
| DEL00016567 | chr2 | 59,194,805 | 59,194,947 | 142    | Loss |
| DEL00016569 | chr2 | 59,233,548 | 59,233,620 | 72     | Loss |
| DEL00016570 | chr2 | 59,258,044 | 59,258,563 | 519    | Loss |
| DEL00016573 | chr2 | 59,276,529 | 59,276,768 | 239    | Loss |
| DEL00016574 | chr2 | 59,302,081 | 59,302,151 | 70     | Loss |
| DEL00016580 | chr2 | 59,377,572 | 59,377,690 | 118    | Loss |
| DEL00016581 | chr2 | 59,394,398 | 59,394,546 | 148    | Loss |
| DEL00016590 | chr2 | 59,579,771 | 59,579,847 | 76     | Loss |
| DEL00016597 | chr2 | 59,697,247 | 59,697,418 | 171    | Loss |
| DEL00016606 | chr2 | 59,907,024 | 59,907,412 | 388    | Loss |
| DEL00016612 | chr2 | 60,107,866 | 60,107,920 | 54     | Loss |
| DEL00016613 | chr2 | 60,113,411 | 60,113,527 | 116    | Loss |
| DEL00016614 | chr2 | 60,124,127 | 60,124,216 | 89     | Loss |
| DEL00016619 | chr2 | 60,284,957 | 60,286,662 | 1,705  | Loss |
| DEL00016623 | chr2 | 60,372,027 | 60,372,289 | 262    | Loss |
| DEL00016629 | chr2 | 60,479,855 | 60,479,958 | 103    | Loss |
| DEL00016630 | chr2 | 60,488,398 | 60,488,616 | 218    | Loss |
| DEL00016642 | chr2 | 60,708,358 | 60,708,409 | 51     | Loss |
| DEL00016645 | chr2 | 60,831,816 | 60,837,827 | 6,011  | Loss |
| DEL00016646 | chr2 | 60,849,023 | 60,849,198 | 175    | Loss |
| DEL00016647 | chr2 | 60,867,103 | 60,867,171 | 68     | Loss |
| DEL00016652 | chr2 | 60,953,219 | 60,953,649 | 430    | Loss |
| DEL00016657 | chr2 | 61,073,710 | 61,074,277 | 567    | Loss |
| DEL00016659 | chr2 | 61,089,646 | 61,089,698 | 52     | Loss |
| DEL00016663 | chr2 | 61,311,538 | 61,312,040 | 502    | Loss |
| DEL00016675 | chr2 | 61,450,013 | 61,450,711 | 698    | Loss |
| DEL00016678 | chr2 | 61,565,827 | 61,565,879 | 52     | Loss |
| DEL00016682 | chr2 | 61,704,248 | 61,705,798 | 1,550  | Loss |
| DEL00016690 | chr2 | 61,917,192 | 61,918,056 | 864    | Loss |
| DEL00016697 | chr2 | 62,016,579 | 62,017,119 | 540    | Loss |
| DEL00016698 | chr2 | 62,017,478 | 62,017,559 | 81     | Loss |
| DEL00016701 | chr2 | 62,114,101 | 62,114,417 | 316    | Loss |
| DUP00016704 | chr2 | 62,194,652 | 62,220,389 | 25,737 | Gain |
| DEL00016708 | chr2 | 62,263,550 | 62,263,805 | 255    | Loss |
| DEL00016716 | chr2 | 62,503,403 | 62,503,845 | 442    | Loss |
| DEL00016720 | chr2 | 62,524,146 | 62,524,231 | 85     | Loss |
| DEL00016722 | chr2 | 62,571,750 | 62,572,549 | 799    | Loss |
| DEL00016724 | chr2 | 62,593,193 | 62,593,924 | 731    | Loss |
| DEL00016727 | chr2 | 62,620,076 | 62,620,558 | 482    | Loss |
| DEL00016736 | chr2 | 62,952,553 | 62,952,725 | 172    | Loss |
| DEL00016738 | chr2 | 62,957,175 | 62,957,473 | 298    | Loss |
| DEL00016741 | chr2 | 63,021,918 | 63,022,115 | 197    | Loss |
| DEL00016742 | chr2 | 63,053,968 | 63,054,034 | 66     | Loss |
| DEL00016745 | chr2 | 63,114,322 | 63,114,547 | 225    | Loss |
| DEL00016747 | chr2 | 63,260,606 | 63,260,705 | 99     | Loss |
| DEL00016750 | chr2 | 63,273,446 | 63,273,497 | 51     | Loss |
| DEL00016753 | chr2 | 63,432,141 | 63,432,907 | 766    | Loss |
| DEL00016754 | chr2 | 63,452,734 | 63,452,792 | 58     | Loss |
| DEL00016755 | chr2 | 63,475,862 | 63,479,154 | 3,292  | Loss |

|             |      |            |            |       |      |
|-------------|------|------------|------------|-------|------|
| DEL00016757 | chr2 | 63,549,439 | 63,550,398 | 959   | Loss |
| DEL00016759 | chr2 | 63,675,970 | 63,676,035 | 65    | Loss |
| DEL00016762 | chr2 | 63,696,452 | 63,696,644 | 192   | Loss |
| DEL00016768 | chr2 | 63,909,699 | 63,909,864 | 165   | Loss |
| DEL00016769 | chr2 | 63,925,947 | 63,927,034 | 1,087 | Loss |
| DEL00016778 | chr2 | 64,166,310 | 64,166,764 | 454   | Loss |
| DEL00016781 | chr2 | 64,198,304 | 64,198,528 | 224   | Loss |
| DEL00016782 | chr2 | 64,210,130 | 64,210,474 | 344   | Loss |
| DEL00016788 | chr2 | 64,434,401 | 64,434,466 | 65    | Loss |
| DEL00016789 | chr2 | 64,444,381 | 64,444,437 | 56    | Loss |
| DEL00016796 | chr2 | 64,617,902 | 64,617,964 | 62    | Loss |
| DEL00016803 | chr2 | 64,841,736 | 64,842,169 | 433   | Loss |
| DEL00016808 | chr2 | 64,920,994 | 64,921,110 | 116   | Loss |
| DEL00016809 | chr2 | 64,974,545 | 64,974,672 | 127   | Loss |
| DEL00016816 | chr2 | 64,993,950 | 64,994,300 | 350   | Loss |
| DEL00016817 | chr2 | 64,994,593 | 64,996,820 | 2,227 | Loss |
| DEL00016839 | chr2 | 65,257,688 | 65,257,771 | 83    | Loss |
| DEL00016840 | chr2 | 65,284,360 | 65,284,753 | 393   | Loss |
| DEL00016845 | chr2 | 65,341,955 | 65,342,018 | 63    | Loss |
| DEL00016848 | chr2 | 65,351,129 | 65,351,255 | 126   | Loss |
| DEL00016851 | chr2 | 65,376,089 | 65,376,487 | 398   | Loss |
| DEL00016861 | chr2 | 65,548,526 | 65,548,654 | 128   | Loss |
| DEL00016863 | chr2 | 65,592,281 | 65,593,775 | 1,494 | Loss |
| DEL00016866 | chr2 | 65,611,719 | 65,612,970 | 1,251 | Loss |
| DEL00016867 | chr2 | 65,644,513 | 65,644,800 | 287   | Loss |
| DUP00016868 | chr2 | 65,663,285 | 65,663,401 | 116   | Gain |
| DEL00016869 | chr2 | 65,699,335 | 65,699,415 | 80    | Loss |
| DEL00016895 | chr2 | 65,957,593 | 65,957,670 | 77    | Loss |
| DEL00016900 | chr2 | 66,074,811 | 66,074,934 | 123   | Loss |
| DEL00016901 | chr2 | 66,107,391 | 66,107,475 | 84    | Loss |
| DEL00016902 | chr2 | 66,115,418 | 66,115,710 | 292   | Loss |
| DEL00016907 | chr2 | 66,268,166 | 66,268,323 | 157   | Loss |
| DEL00016908 | chr2 | 66,287,139 | 66,287,266 | 127   | Loss |
| DEL00016923 | chr2 | 66,398,364 | 66,398,444 | 80    | Loss |
| DEL00016924 | chr2 | 66,408,142 | 66,408,211 | 69    | Loss |
| DEL00016929 | chr2 | 66,562,474 | 66,562,530 | 56    | Loss |
| DEL00016931 | chr2 | 66,610,349 | 66,610,408 | 59    | Loss |
| DEL00016932 | chr2 | 66,625,882 | 66,626,807 | 925   | Loss |
| DEL00016939 | chr2 | 66,758,720 | 66,758,810 | 90    | Loss |
| DEL00016946 | chr2 | 66,858,316 | 66,860,761 | 2,445 | Loss |
| DEL00016950 | chr2 | 66,912,069 | 66,912,234 | 165   | Loss |
| DEL00016953 | chr2 | 66,938,707 | 66,940,289 | 1,582 | Loss |
| DEL00016957 | chr2 | 67,024,892 | 67,024,948 | 56    | Loss |
| DEL00016958 | chr2 | 67,037,802 | 67,037,870 | 68    | Loss |
| DEL00016961 | chr2 | 67,176,030 | 67,176,089 | 59    | Loss |
| DEL00016971 | chr2 | 67,231,906 | 67,232,392 | 486   | Loss |
| DEL00016973 | chr2 | 67,328,361 | 67,328,843 | 482   | Loss |
| DEL00016974 | chr2 | 67,340,020 | 67,340,105 | 85    | Loss |
| DEL00016978 | chr2 | 67,360,558 | 67,360,742 | 184   | Loss |

|             |      |            |            |        |      |
|-------------|------|------------|------------|--------|------|
| DEL00016979 | chr2 | 67,407,864 | 67,408,281 | 417    | Loss |
| DEL00016980 | chr2 | 67,433,745 | 67,433,958 | 213    | Loss |
| DEL00016984 | chr2 | 67,485,953 | 67,486,032 | 79     | Loss |
| DEL00016989 | chr2 | 67,519,322 | 67,519,472 | 150    | Loss |
| DEL00016990 | chr2 | 67,521,492 | 67,521,547 | 55     | Loss |
| DEL00016998 | chr2 | 67,625,885 | 67,625,950 | 65     | Loss |
| DEL00017016 | chr2 | 67,763,251 | 67,763,306 | 55     | Loss |
| DEL00017026 | chr2 | 67,909,798 | 67,910,035 | 237    | Loss |
| DEL00017028 | chr2 | 67,977,038 | 67,977,546 | 508    | Loss |
| DEL00017033 | chr2 | 68,049,111 | 68,049,162 | 51     | Loss |
| DEL00017036 | chr2 | 68,170,679 | 68,170,757 | 78     | Loss |
| DUP00017037 | chr2 | 68,178,493 | 68,178,619 | 126    | Gain |
| DEL00017041 | chr2 | 68,307,854 | 68,308,744 | 890    | Loss |
| DEL00017045 | chr2 | 68,351,448 | 68,351,637 | 189    | Loss |
| DEL00017046 | chr2 | 68,401,083 | 68,401,249 | 166    | Loss |
| DEL00017047 | chr2 | 68,472,091 | 68,472,212 | 121    | Loss |
| DEL00017051 | chr2 | 68,549,447 | 68,549,533 | 86     | Loss |
| DEL00017053 | chr2 | 68,590,573 | 68,590,696 | 123    | Loss |
| DEL00017057 | chr2 | 68,605,807 | 68,606,287 | 480    | Loss |
| DEL00017059 | chr2 | 68,646,618 | 68,648,189 | 1,571  | Loss |
| DEL00017060 | chr2 | 68,669,839 | 68,669,973 | 134    | Loss |
| DUP00017062 | chr2 | 68,767,150 | 68,767,318 | 168    | Gain |
| DEL00017071 | chr2 | 68,828,480 | 68,828,918 | 438    | Loss |
| DEL00017073 | chr2 | 68,954,486 | 68,955,095 | 609    | Loss |
| DEL00017074 | chr2 | 68,987,590 | 68,987,680 | 90     | Loss |
| DEL00017076 | chr2 | 68,993,766 | 68,993,981 | 215    | Loss |
| DEL00017090 | chr2 | 69,025,228 | 69,025,862 | 634    | Loss |
| DEL00017121 | chr2 | 69,040,412 | 69,046,934 | 6,522  | Loss |
| DUP00017126 | chr2 | 69,082,270 | 69,082,354 | 84     | Gain |
| DEL00017128 | chr2 | 69,145,790 | 69,146,634 | 844    | Loss |
| DEL00017130 | chr2 | 69,172,880 | 69,173,395 | 515    | Loss |
| DEL00017137 | chr2 | 69,315,515 | 69,315,922 | 407    | Loss |
| DEL00017138 | chr2 | 69,325,957 | 69,327,355 | 1,398  | Loss |
| DEL00017140 | chr2 | 69,354,679 | 69,354,962 | 283    | Loss |
| DEL00017145 | chr2 | 69,551,977 | 69,552,675 | 698    | Loss |
| DEL00017151 | chr2 | 69,639,072 | 69,639,659 | 587    | Loss |
| DEL00017160 | chr2 | 69,781,886 | 69,782,197 | 311    | Loss |
| DEL00017161 | chr2 | 69,839,318 | 69,840,998 | 1,680  | Loss |
| DEL00017162 | chr2 | 69,851,110 | 69,851,481 | 371    | Loss |
| DEL00017165 | chr2 | 69,893,391 | 69,897,538 | 4,147  | Loss |
| DEL00017170 | chr2 | 69,944,743 | 69,944,797 | 54     | Loss |
| DEL00017172 | chr2 | 69,951,506 | 69,951,647 | 141    | Loss |
| DUP00017185 | chr2 | 70,178,969 | 70,202,393 | 23,424 | Gain |
| DEL00017187 | chr2 | 70,235,285 | 70,235,775 | 490    | Loss |
| DEL00017192 | chr2 | 70,302,852 | 70,303,486 | 634    | Loss |
| DUP00017199 | chr2 | 70,398,315 | 70,398,522 | 207    | Gain |
| DEL00017200 | chr2 | 70,430,534 | 70,431,284 | 750    | Loss |
| DEL00017204 | chr2 | 70,471,761 | 70,472,809 | 1,048  | Loss |
| DEL00017215 | chr2 | 70,535,967 | 70,536,034 | 67     | Loss |

|             |      |            |            |        |       |
|-------------|------|------------|------------|--------|-------|
| DEL00017216 | chr2 | 70,630,194 | 70,630,711 | 517    | Loss  |
| DEL00017220 | chr2 | 70,702,900 | 70,703,822 | 922    | Loss  |
| DEL00017221 | chr2 | 70,712,702 | 70,712,757 | 55     | Loss  |
| DEL00017225 | chr2 | 70,767,696 | 70,768,320 | 624    | Loss  |
| DUP00017227 | chr2 | 70,773,785 | 70,785,802 | 12,017 | Gain  |
| DEL00017237 | chr2 | 70,919,325 | 70,919,402 | 77     | Loss  |
| DEL00017238 | chr2 | 70,939,243 | 70,939,313 | 70     | Loss  |
| DEL00017239 | chr2 | 70,991,112 | 70,992,715 | 1,603  | Loss  |
| DEL00017243 | chr2 | 71,067,275 | 71,068,485 | 1,210  | Loss  |
| DUP00017245 | chr2 | 71,139,638 | 71,139,868 | 230    | Gain  |
| DEL00017247 | chr2 | 71,211,799 | 71,211,928 | 129    | Loss  |
| DEL00017250 | chr2 | 71,243,490 | 71,243,628 | 138    | Loss  |
| DEL00017255 | chr2 | 71,343,015 | 71,343,245 | 230    | Loss  |
| DEL00017262 | chr2 | 71,401,794 | 71,401,867 | 73     | Loss  |
| DEL00017264 | chr2 | 71,445,585 | 71,445,642 | 57     | Loss  |
| DEL00017269 | chr2 | 71,486,737 | 71,493,193 | 6,456  | Loss  |
| DEL00017274 | chr2 | 71,579,358 | 71,579,509 | 151    | Loss  |
| DEL00017279 | chr2 | 71,711,594 | 71,712,064 | 470    | Loss  |
| DEL00017286 | chr2 | 71,835,953 | 71,836,009 | 56     | Loss  |
| DEL00017288 | chr2 | 71,851,562 | 71,851,692 | 130    | Loss  |
| DEL00017289 | chr2 | 71,869,196 | 71,869,415 | 219    | Loss  |
| DUP00017290 | chr2 | 71,872,261 | 71,900,105 | 27,844 | Mixed |
| DEL00017299 | chr2 | 71,959,483 | 71,959,558 | 75     | Loss  |
| DEL00017301 | chr2 | 71,971,097 | 71,971,225 | 128    | Loss  |
| DEL00017304 | chr2 | 72,000,098 | 72,002,180 | 2,082  | Loss  |
| DEL00017317 | chr2 | 72,202,674 | 72,203,414 | 740    | Loss  |
| DEL00017322 | chr2 | 72,327,038 | 72,328,041 | 1,003  | Loss  |
| DEL00017323 | chr2 | 72,331,733 | 72,331,941 | 208    | Loss  |
| DEL00017324 | chr2 | 72,352,550 | 72,353,423 | 873    | Loss  |
| DEL00017326 | chr2 | 72,411,390 | 72,412,508 | 1,118  | Loss  |
| DEL00017327 | chr2 | 72,426,306 | 72,426,762 | 456    | Loss  |
| DEL00017339 | chr2 | 72,502,392 | 72,503,618 | 1,226  | Loss  |
| DEL00017351 | chr2 | 72,602,989 | 72,605,397 | 2,408  | Loss  |
| DEL00017354 | chr2 | 72,636,772 | 72,636,843 | 71     | Loss  |
| DEL00017358 | chr2 | 72,716,413 | 72,716,523 | 110    | Loss  |
| DEL00017368 | chr2 | 72,855,780 | 72,856,251 | 471    | Loss  |
| DEL00017371 | chr2 | 72,896,491 | 72,896,955 | 464    | Loss  |
| DEL00017377 | chr2 | 73,025,083 | 73,026,868 | 1,785  | Loss  |
| DEL00017383 | chr2 | 73,112,871 | 73,113,134 | 263    | Loss  |
| DUP00017386 | chr2 | 73,171,704 | 73,171,891 | 187    | Gain  |
| DEL00017387 | chr2 | 73,200,348 | 73,200,622 | 274    | Loss  |
| DEL00017388 | chr2 | 73,239,808 | 73,242,253 | 2,445  | Loss  |
| DEL00017408 | chr2 | 73,658,288 | 73,658,960 | 672    | Loss  |
| DEL00017411 | chr2 | 73,760,002 | 73,760,321 | 319    | Loss  |
| DEL00017414 | chr2 | 73,826,737 | 73,830,548 | 3,811  | Loss  |
| DEL00017422 | chr2 | 74,012,978 | 74,019,392 | 6,414  | Loss  |
| DEL00017425 | chr2 | 74,041,531 | 74,041,596 | 65     | Loss  |
| DEL00017430 | chr2 | 74,076,488 | 74,077,033 | 545    | Loss  |
| DUP00017432 | chr2 | 74,119,384 | 74,133,628 | 14,244 | Gain  |



|             |      |            |            |       |      |
|-------------|------|------------|------------|-------|------|
| DEL00017434 | chr2 | 74,228,927 | 74,234,146 | 5,219 | Loss |
| DEL00017442 | chr2 | 74,387,860 | 74,388,072 | 212   | Loss |
| DEL00017444 | chr2 | 74,395,764 | 74,396,203 | 439   | Loss |
| DEL00017448 | chr2 | 74,458,527 | 74,458,661 | 134   | Loss |
| DEL00017449 | chr2 | 74,466,365 | 74,469,214 | 2,849 | Loss |
| DEL00017457 | chr2 | 74,531,529 | 74,531,648 | 119   | Loss |
| DEL00017459 | chr2 | 74,536,901 | 74,536,966 | 65    | Loss |
| DEL00017477 | chr2 | 74,723,881 | 74,723,944 | 63    | Loss |
| DEL00017484 | chr2 | 74,933,163 | 74,933,452 | 289   | Loss |
| DEL00017487 | chr2 | 74,964,216 | 74,964,279 | 63    | Loss |
| DEL00017489 | chr2 | 74,999,712 | 75,000,993 | 1,281 | Loss |
| DEL00017497 | chr2 | 75,190,546 | 75,191,397 | 851   | Loss |
| DEL00017498 | chr2 | 75,198,138 | 75,198,202 | 64    | Loss |
| DEL00017500 | chr2 | 75,213,463 | 75,214,258 | 795   | Loss |
| DEL00017501 | chr2 | 75,226,773 | 75,228,177 | 1,404 | Loss |
| DUP00017509 | chr2 | 75,375,285 | 75,375,523 | 238   | Gain |
| DEL00017512 | chr2 | 75,485,946 | 75,486,115 | 169   | Loss |
| DEL00017513 | chr2 | 75,488,755 | 75,488,829 | 74    | Loss |
| DEL00017514 | chr2 | 75,494,703 | 75,497,501 | 2,798 | Loss |
| DEL00017515 | chr2 | 75,542,874 | 75,542,930 | 56    | Loss |
| DUP00017517 | chr2 | 75,582,810 | 75,582,934 | 124   | Gain |
| DEL00017519 | chr2 | 75,693,505 | 75,693,626 | 121   | Loss |
| DEL00017527 | chr2 | 75,882,845 | 75,882,998 | 153   | Loss |
| DEL00017529 | chr2 | 75,907,979 | 75,909,081 | 1,102 | Loss |
| DEL00017530 | chr2 | 75,913,703 | 75,913,858 | 155   | Loss |
| DEL00017532 | chr2 | 75,918,577 | 75,919,451 | 874   | Loss |
| DEL00017534 | chr2 | 75,950,340 | 75,950,523 | 183   | Loss |
| DEL00017536 | chr2 | 75,966,500 | 75,966,657 | 157   | Loss |
| DEL00017537 | chr2 | 75,967,386 | 75,969,780 | 2,394 | Loss |
| DEL00017568 | chr2 | 76,434,461 | 76,434,597 | 136   | Loss |
| DEL00017575 | chr2 | 76,597,875 | 76,598,068 | 193   | Loss |
| DEL00017577 | chr2 | 76,627,259 | 76,627,550 | 291   | Loss |
| DEL00017578 | chr2 | 76,627,953 | 76,628,143 | 190   | Loss |
| DUP00017587 | chr2 | 76,754,828 | 76,754,932 | 104   | Gain |
| DEL00017590 | chr2 | 76,804,366 | 76,805,593 | 1,227 | Loss |
| DEL00017594 | chr2 | 76,871,046 | 76,871,624 | 578   | Loss |
| DEL00017596 | chr2 | 76,885,958 | 76,886,119 | 161   | Loss |
| DEL00017598 | chr2 | 76,887,671 | 76,887,958 | 287   | Loss |
| DEL00017599 | chr2 | 76,893,700 | 76,893,939 | 239   | Loss |
| DEL00017600 | chr2 | 76,901,616 | 76,901,828 | 212   | Loss |
| DEL00017603 | chr2 | 76,948,688 | 76,948,817 | 129   | Loss |
| DEL00017608 | chr2 | 77,041,105 | 77,044,154 | 3,049 | Loss |
| DEL00017609 | chr2 | 77,069,361 | 77,073,616 | 4,255 | Loss |
| DEL00017610 | chr2 | 77,079,250 | 77,079,302 | 52    | Loss |
| DEL00017612 | chr2 | 77,095,414 | 77,095,897 | 483   | Loss |
| DEL00017613 | chr2 | 77,115,486 | 77,115,603 | 117   | Loss |
| DEL00017615 | chr2 | 77,138,848 | 77,140,688 | 1,840 | Loss |
| DEL00017617 | chr2 | 77,146,325 | 77,147,553 | 1,228 | Loss |
| DEL00017619 | chr2 | 77,153,823 | 77,154,033 | 210   | Loss |

|             |      |            |            |        |      |
|-------------|------|------------|------------|--------|------|
| DEL00017620 | chr2 | 77,175,324 | 77,175,375 | 51     | Loss |
| DEL00017621 | chr2 | 77,176,050 | 77,176,794 | 744    | Loss |
| DEL00017623 | chr2 | 77,199,036 | 77,199,163 | 127    | Loss |
| DEL00017628 | chr2 | 77,252,520 | 77,252,834 | 314    | Loss |
| DEL00017630 | chr2 | 77,265,545 | 77,266,154 | 609    | Loss |
| DEL00017631 | chr2 | 77,283,041 | 77,283,134 | 93     | Loss |
| DEL00017634 | chr2 | 77,303,285 | 77,303,341 | 56     | Loss |
| DEL00017636 | chr2 | 77,311,785 | 77,311,838 | 53     | Loss |
| DEL00017637 | chr2 | 77,328,393 | 77,330,267 | 1,874  | Loss |
| DEL00017639 | chr2 | 77,356,016 | 77,356,097 | 81     | Loss |
| DEL00017640 | chr2 | 77,374,524 | 77,375,004 | 480    | Loss |
| DEL00017642 | chr2 | 77,400,862 | 77,402,278 | 1,416  | Loss |
| DEL00017643 | chr2 | 77,402,465 | 77,402,623 | 158    | Loss |
| DEL00017646 | chr2 | 77,479,950 | 77,480,084 | 134    | Loss |
| DEL00017652 | chr2 | 77,592,583 | 77,592,656 | 73     | Loss |
| DEL00017653 | chr2 | 77,598,653 | 77,598,849 | 196    | Loss |
| DEL00017655 | chr2 | 77,673,313 | 77,673,520 | 207    | Loss |
| DEL00017659 | chr2 | 77,815,383 | 77,815,435 | 52     | Loss |
| DEL00017662 | chr2 | 77,932,225 | 77,932,944 | 719    | Loss |
| DEL00017669 | chr2 | 78,177,964 | 78,178,234 | 270    | Loss |
| DEL00017672 | chr2 | 78,257,359 | 78,257,424 | 65     | Loss |
| DEL00017674 | chr2 | 78,269,418 | 78,269,479 | 61     | Loss |
| DEL00017676 | chr2 | 78,329,875 | 78,331,169 | 1,294  | Loss |
| DEL00017679 | chr2 | 78,341,318 | 78,341,912 | 594    | Loss |
| DEL00017680 | chr2 | 78,375,776 | 78,376,846 | 1,070  | Loss |
| DEL00017683 | chr2 | 78,482,501 | 78,485,317 | 2,816  | Loss |
| DEL00017694 | chr2 | 78,720,479 | 78,721,470 | 991    | Loss |
| DUP00017695 | chr2 | 78,723,239 | 78,733,524 | 10,285 | Gain |
| DEL00017698 | chr2 | 78,762,302 | 78,762,480 | 178    | Loss |
| DEL00017702 | chr2 | 78,807,749 | 78,807,800 | 51     | Loss |
| DEL00017706 | chr2 | 78,886,187 | 78,886,705 | 518    | Loss |
| DEL00017709 | chr2 | 78,901,263 | 78,901,322 | 59     | Loss |
| DEL00017715 | chr2 | 78,963,181 | 78,963,538 | 357    | Loss |
| DEL00017723 | chr2 | 79,049,397 | 79,049,496 | 99     | Loss |
| DEL00017724 | chr2 | 79,068,875 | 79,069,737 | 862    | Loss |
| DEL00017728 | chr2 | 79,094,826 | 79,098,689 | 3,863  | Loss |
| DUP00017808 | chr2 | 79,134,185 | 79,134,487 | 302    | Gain |
| DEL00017814 | chr2 | 79,258,629 | 79,261,866 | 3,237  | Loss |
| DEL00017820 | chr2 | 79,347,915 | 79,348,038 | 123    | Loss |
| DEL00017826 | chr2 | 79,441,080 | 79,441,431 | 351    | Loss |
| DEL00017827 | chr2 | 79,461,741 | 79,462,294 | 553    | Loss |
| DEL00017835 | chr2 | 79,637,270 | 79,637,441 | 171    | Loss |
| DEL00017839 | chr2 | 79,721,681 | 79,721,977 | 296    | Loss |
| DEL00017842 | chr2 | 79,778,453 | 79,778,934 | 481    | Loss |
| DEL00017852 | chr2 | 79,885,135 | 79,885,211 | 76     | Loss |
| DEL00017860 | chr2 | 79,999,952 | 80,000,122 | 170    | Loss |
| DEL00017867 | chr2 | 80,097,626 | 80,097,778 | 152    | Loss |
| DEL00017871 | chr2 | 80,132,080 | 80,132,732 | 652    | Loss |
| DEL00017875 | chr2 | 80,252,485 | 80,253,239 | 754    | Loss |

|             |      |            |            |       |      |
|-------------|------|------------|------------|-------|------|
| DEL00017883 | chr2 | 80,438,979 | 80,439,762 | 783   | Loss |
| DEL00017891 | chr2 | 80,513,545 | 80,514,176 | 631   | Loss |
| DEL00017895 | chr2 | 80,549,050 | 80,549,102 | 52    | Loss |
| DEL00017898 | chr2 | 80,564,272 | 80,564,417 | 145   | Loss |
| DEL00017899 | chr2 | 80,567,222 | 80,567,319 | 97    | Loss |
| DEL00017902 | chr2 | 80,638,180 | 80,638,329 | 149   | Loss |
| DEL00017908 | chr2 | 80,748,229 | 80,748,839 | 610   | Loss |
| DEL00017909 | chr2 | 80,777,631 | 80,778,100 | 469   | Loss |
| DEL00017913 | chr2 | 80,806,470 | 80,806,533 | 63    | Loss |
| DEL00017916 | chr2 | 80,815,940 | 80,816,413 | 473   | Loss |
| DEL00017935 | chr2 | 81,063,786 | 81,063,845 | 59    | Loss |
| DEL00017938 | chr2 | 81,206,168 | 81,206,243 | 75    | Loss |
| DEL00017948 | chr2 | 81,380,277 | 81,380,463 | 186   | Loss |
| DEL00017951 | chr2 | 81,395,022 | 81,395,355 | 333   | Loss |
| DEL00017961 | chr2 | 81,641,776 | 81,642,949 | 1,173 | Loss |
| DEL00017963 | chr2 | 81,688,054 | 81,688,271 | 217   | Loss |
| DEL00017964 | chr2 | 81,710,064 | 81,710,928 | 864   | Loss |
| DEL00017968 | chr2 | 81,832,195 | 81,832,737 | 542   | Loss |
| DEL00017969 | chr2 | 81,913,073 | 81,913,995 | 922   | Loss |
| DEL00017972 | chr2 | 81,919,665 | 81,919,817 | 152   | Loss |
| DEL00017976 | chr2 | 82,023,914 | 82,024,306 | 392   | Loss |
| DUP00017978 | chr2 | 82,027,816 | 82,027,987 | 171   | Gain |
| DEL00017979 | chr2 | 82,030,800 | 82,031,732 | 932   | Loss |
| DEL00017980 | chr2 | 82,046,949 | 82,047,865 | 916   | Loss |
| DEL00017981 | chr2 | 82,063,107 | 82,069,312 | 6,205 | Loss |
| DEL00017982 | chr2 | 82,108,646 | 82,108,698 | 52    | Loss |
| DEL00017983 | chr2 | 82,160,433 | 82,160,507 | 74    | Loss |
| DEL00017988 | chr2 | 82,302,673 | 82,302,899 | 226   | Loss |
| DEL00017990 | chr2 | 82,339,088 | 82,339,461 | 373   | Loss |
| DEL00017995 | chr2 | 82,429,833 | 82,429,962 | 129   | Loss |
| DEL00017998 | chr2 | 82,634,094 | 82,634,500 | 406   | Loss |
| DEL00018000 | chr2 | 82,641,484 | 82,641,556 | 72    | Loss |
| DEL00018007 | chr2 | 82,769,897 | 82,770,377 | 480   | Loss |
| DEL00018011 | chr2 | 82,867,601 | 82,867,778 | 177   | Loss |
| DEL00018012 | chr2 | 82,875,424 | 82,876,600 | 1,176 | Loss |
| DEL00018019 | chr2 | 83,004,306 | 83,004,589 | 283   | Loss |
| DEL00018024 | chr2 | 83,118,565 | 83,118,731 | 166   | Loss |
| DEL00018026 | chr2 | 83,133,388 | 83,133,441 | 53    | Loss |
| DEL00018030 | chr2 | 83,274,485 | 83,274,732 | 247   | Loss |
| DUP00018031 | chr2 | 83,275,818 | 83,276,279 | 461   | Gain |
| DEL00018035 | chr2 | 83,414,143 | 83,414,848 | 705   | Loss |
| DEL00018036 | chr2 | 83,445,522 | 83,445,654 | 132   | Loss |
| DEL00018038 | chr2 | 83,477,524 | 83,477,766 | 242   | Loss |
| DEL00018040 | chr2 | 83,502,059 | 83,502,171 | 112   | Loss |
| DEL00018041 | chr2 | 83,530,830 | 83,531,097 | 267   | Loss |
| DEL00018042 | chr2 | 83,572,491 | 83,572,995 | 504   | Loss |
| DEL00018048 | chr2 | 83,613,372 | 83,613,432 | 60    | Loss |
| DEL00018049 | chr2 | 83,617,956 | 83,618,014 | 58    | Loss |
| DEL00018050 | chr2 | 83,714,793 | 83,714,844 | 51    | Loss |

|             |      |            |            |        |       |
|-------------|------|------------|------------|--------|-------|
| DEL00018052 | chr2 | 83,788,011 | 83,788,092 | 81     | Loss  |
| DEL00018059 | chr2 | 84,037,552 | 84,037,639 | 87     | Loss  |
| DEL00018060 | chr2 | 84,038,382 | 84,038,489 | 107    | Loss  |
| DEL00018067 | chr2 | 84,113,058 | 84,132,235 | 19,177 | Loss  |
| DEL00018069 | chr2 | 84,162,767 | 84,163,420 | 653    | Loss  |
| DEL00018074 | chr2 | 84,201,903 | 84,202,670 | 767    | Loss  |
| DEL00018077 | chr2 | 84,216,702 | 84,216,820 | 118    | Loss  |
| DEL00018080 | chr2 | 84,255,848 | 84,255,902 | 54     | Loss  |
| DEL00018083 | chr2 | 84,332,106 | 84,332,396 | 290    | Loss  |
| DEL00018084 | chr2 | 84,366,993 | 84,367,303 | 310    | Loss  |
| DEL00018086 | chr2 | 84,380,786 | 84,381,087 | 301    | Loss  |
| DEL00018089 | chr2 | 84,441,019 | 84,441,248 | 229    | Loss  |
| DEL00018091 | chr2 | 84,476,869 | 84,477,028 | 159    | Loss  |
| DEL00018099 | chr2 | 84,711,284 | 84,711,344 | 60     | Loss  |
| DEL00018102 | chr2 | 84,779,460 | 84,779,521 | 61     | Loss  |
| DEL00018104 | chr2 | 84,844,883 | 84,845,310 | 427    | Loss  |
| DEL00018107 | chr2 | 84,849,765 | 84,860,875 | 11,110 | Mixed |
| DEL00018109 | chr2 | 84,885,518 | 84,886,792 | 1,274  | Loss  |
| DEL00018111 | chr2 | 84,899,097 | 84,899,366 | 269    | Loss  |
| DEL00018112 | chr2 | 84,940,007 | 84,940,058 | 51     | Loss  |
| DEL00018113 | chr2 | 84,993,722 | 84,994,202 | 480    | Loss  |
| DEL00018115 | chr2 | 85,061,048 | 85,061,909 | 861    | Loss  |
| DEL00018117 | chr2 | 85,069,573 | 85,070,631 | 1,058  | Loss  |
| DEL00018119 | chr2 | 85,088,850 | 85,089,050 | 200    | Loss  |
| DEL00018121 | chr2 | 85,093,406 | 85,093,465 | 59     | Loss  |
| DEL00018128 | chr2 | 85,323,734 | 85,324,486 | 752    | Loss  |
| DEL00018130 | chr2 | 85,441,918 | 85,442,074 | 156    | Loss  |
| DEL00018131 | chr2 | 85,463,197 | 85,464,002 | 805    | Loss  |
| DEL00018132 | chr2 | 85,464,726 | 85,465,894 | 1,168  | Loss  |
| DEL00018134 | chr2 | 85,516,138 | 85,516,218 | 80     | Loss  |
| DEL00018138 | chr2 | 85,618,292 | 85,618,349 | 57     | Loss  |
| DEL00018141 | chr2 | 85,661,818 | 85,663,457 | 1,639  | Loss  |
| DEL00018146 | chr2 | 85,742,683 | 85,742,821 | 138    | Loss  |
| DEL00018149 | chr2 | 85,743,959 | 85,744,247 | 288    | Loss  |
| DUP00018158 | chr2 | 85,853,155 | 85,856,647 | 3,492  | Gain  |
| DEL00018159 | chr2 | 85,867,273 | 85,867,340 | 67     | Loss  |
| DEL00018170 | chr2 | 85,923,627 | 85,926,671 | 3,044  | Loss  |
| DEL00018171 | chr2 | 85,976,646 | 85,977,177 | 531    | Loss  |
| DEL00018173 | chr2 | 86,011,622 | 86,012,398 | 776    | Loss  |
| DEL00018177 | chr2 | 86,077,009 | 86,077,111 | 102    | Loss  |
| DEL00018184 | chr2 | 86,150,992 | 86,151,048 | 56     | Loss  |
| DEL00018185 | chr2 | 86,160,230 | 86,160,315 | 85     | Loss  |
| DEL00018186 | chr2 | 86,191,738 | 86,191,887 | 149    | Loss  |
| DEL00018191 | chr2 | 86,266,801 | 86,266,883 | 82     | Loss  |
| DEL00018193 | chr2 | 86,353,130 | 86,355,868 | 2,738  | Loss  |
| DEL00018195 | chr2 | 86,401,798 | 86,401,906 | 108    | Loss  |
| DEL00018200 | chr2 | 86,449,635 | 86,453,315 | 3,680  | Loss  |
| DEL00018201 | chr2 | 86,493,420 | 86,493,499 | 79     | Loss  |
| DEL00018207 | chr2 | 86,716,982 | 86,717,324 | 342    | Loss  |

|             |      |            |            |        |      |
|-------------|------|------------|------------|--------|------|
| DEL00018209 | chr2 | 86,747,256 | 86,756,201 | 8,945  | Loss |
| DEL00018211 | chr2 | 86,818,669 | 86,819,110 | 441    | Loss |
| DEL00018214 | chr2 | 86,886,880 | 86,893,909 | 7,029  | Loss |
| DEL00018224 | chr2 | 87,317,211 | 87,318,878 | 1,667  | Loss |
| DEL00018229 | chr2 | 87,457,862 | 87,462,527 | 4,665  | Loss |
| DEL00018231 | chr2 | 87,487,518 | 87,487,833 | 315    | Loss |
| DEL00018233 | chr2 | 87,505,335 | 87,505,565 | 230    | Loss |
| DEL00018234 | chr2 | 87,519,441 | 87,519,565 | 124    | Loss |
| DEL00018235 | chr2 | 87,542,607 | 87,542,663 | 56     | Loss |
| DEL00018239 | chr2 | 87,654,184 | 87,654,562 | 378    | Loss |
| DEL00018240 | chr2 | 87,665,783 | 87,666,020 | 237    | Loss |
| DEL00018241 | chr2 | 87,687,475 | 87,688,443 | 968    | Loss |
| DEL00018242 | chr2 | 87,725,976 | 87,728,122 | 2,146  | Loss |
| DEL00018243 | chr2 | 87,799,913 | 87,800,028 | 115    | Loss |
| DEL00018248 | chr2 | 87,900,967 | 87,901,038 | 71     | Loss |
| DEL00018254 | chr2 | 87,971,861 | 87,972,147 | 286    | Loss |
| DEL00018256 | chr2 | 88,050,978 | 88,051,038 | 60     | Loss |
| DEL00018263 | chr2 | 88,169,796 | 88,169,863 | 67     | Loss |
| DEL00018267 | chr2 | 88,277,125 | 88,277,253 | 128    | Loss |
| DEL00018268 | chr2 | 88,304,087 | 88,304,606 | 519    | Loss |
| DEL00018274 | chr2 | 88,446,106 | 88,446,185 | 79     | Loss |
| DEL00018283 | chr2 | 88,543,670 | 88,544,101 | 431    | Loss |
| DEL00018287 | chr2 | 88,576,578 | 88,576,762 | 184    | Loss |
| DEL00018288 | chr2 | 88,576,984 | 88,577,091 | 107    | Loss |
| DEL00018289 | chr2 | 88,591,634 | 88,593,621 | 1,987  | Loss |
| DEL00018292 | chr2 | 88,649,307 | 88,649,763 | 456    | Loss |
| DEL00018301 | chr2 | 88,787,950 | 88,788,016 | 66     | Loss |
| DEL00018302 | chr2 | 88,795,890 | 88,795,944 | 54     | Loss |
| DEL00018311 | chr2 | 88,866,114 | 88,866,386 | 272    | Loss |
| DEL00018312 | chr2 | 88,884,834 | 88,885,324 | 490    | Loss |
| DEL00018316 | chr2 | 88,932,752 | 88,932,828 | 76     | Loss |
| DEL00018317 | chr2 | 89,001,537 | 89,002,594 | 1,057  | Loss |
| DEL00018319 | chr2 | 89,022,063 | 89,035,354 | 13,291 | Loss |
| DEL00018321 | chr2 | 89,111,590 | 89,111,673 | 83     | Loss |
| DEL00018323 | chr2 | 89,121,247 | 89,121,315 | 68     | Loss |
| DEL00018327 | chr2 | 89,213,170 | 89,213,430 | 260    | Loss |
| DEL00018336 | chr2 | 89,368,855 | 89,369,332 | 477    | Loss |
| DEL00018338 | chr2 | 89,370,456 | 89,370,784 | 328    | Loss |
| DEL00018340 | chr2 | 89,404,161 | 89,408,793 | 4,632  | Loss |
| DEL00018347 | chr2 | 89,662,143 | 89,662,319 | 176    | Loss |
| DUP00018353 | chr2 | 89,743,157 | 89,743,456 | 299    | Gain |
| DEL00018358 | chr2 | 89,765,313 | 89,765,561 | 248    | Loss |
| DEL00018362 | chr2 | 89,814,331 | 89,814,787 | 456    | Loss |
| DEL00018367 | chr2 | 89,891,493 | 89,892,768 | 1,275  | Loss |
| DEL00018369 | chr2 | 89,930,603 | 89,930,835 | 232    | Loss |
| DEL00018370 | chr2 | 89,940,211 | 89,940,293 | 82     | Loss |
| DEL00018378 | chr2 | 90,035,318 | 90,035,618 | 300    | Loss |
| DEL00018386 | chr2 | 90,119,401 | 90,119,466 | 65     | Loss |
| DEL00018391 | chr2 | 90,240,747 | 90,241,434 | 687    | Loss |

|             |      |            |            |        |      |
|-------------|------|------------|------------|--------|------|
| DEL00018402 | chr2 | 90,368,504 | 90,368,808 | 304    | Loss |
| DEL00018404 | chr2 | 90,386,089 | 90,386,185 | 96     | Loss |
| DEL00018409 | chr2 | 90,461,814 | 90,462,850 | 1,036  | Loss |
| DEL00018412 | chr2 | 90,499,439 | 90,499,520 | 81     | Loss |
| DEL00018416 | chr2 | 90,558,797 | 90,558,892 | 95     | Loss |
| DEL00018420 | chr2 | 90,691,287 | 90,691,367 | 80     | Loss |
| DEL00018422 | chr2 | 90,695,759 | 90,696,161 | 402    | Loss |
| DEL00018431 | chr2 | 90,838,305 | 90,838,516 | 211    | Loss |
| DEL00018434 | chr2 | 90,881,291 | 90,881,373 | 82     | Loss |
| DEL00018453 | chr2 | 91,732,826 | 91,733,553 | 727    | Loss |
| DEL00018454 | chr2 | 91,740,555 | 91,741,337 | 782    | Loss |
| DEL00018456 | chr2 | 91,787,618 | 91,787,758 | 140    | Loss |
| DEL00018459 | chr2 | 91,857,184 | 91,857,329 | 145    | Loss |
| DEL00018460 | chr2 | 91,889,328 | 91,889,444 | 116    | Loss |
| DEL00018463 | chr2 | 91,936,355 | 91,937,212 | 857    | Loss |
| DEL00018471 | chr2 | 92,105,862 | 92,105,947 | 85     | Loss |
| DEL00018477 | chr2 | 92,273,137 | 92,273,239 | 102    | Loss |
| DEL00018478 | chr2 | 92,324,851 | 92,325,049 | 198    | Loss |
| DEL00018482 | chr2 | 92,515,685 | 92,516,467 | 782    | Loss |
| DEL00018486 | chr2 | 92,584,675 | 92,584,737 | 62     | Loss |
| DEL00018490 | chr2 | 92,591,622 | 92,592,066 | 444    | Loss |
| DEL00018495 | chr2 | 92,676,436 | 92,676,487 | 51     | Loss |
| DEL00018496 | chr2 | 92,678,827 | 92,678,902 | 75     | Loss |
| DEL00018497 | chr2 | 92,734,734 | 92,735,079 | 345    | Loss |
| DEL00018499 | chr2 | 92,739,520 | 92,740,008 | 488    | Loss |
| DEL00018501 | chr2 | 92,801,111 | 92,801,977 | 866    | Loss |
| DEL00018502 | chr2 | 92,806,398 | 92,806,526 | 128    | Loss |
| DEL00018508 | chr2 | 92,942,285 | 92,942,577 | 292    | Loss |
| DEL00018514 | chr2 | 92,986,352 | 92,986,766 | 414    | Loss |
| DEL00018521 | chr2 | 93,091,177 | 93,092,097 | 920    | Loss |
| DEL00018533 | chr2 | 93,204,092 | 93,204,170 | 78     | Loss |
| DEL00018534 | chr2 | 93,216,106 | 93,216,385 | 279    | Loss |
| DEL00018535 | chr2 | 93,230,834 | 93,238,247 | 7,413  | Loss |
| DEL00018536 | chr2 | 93,241,033 | 93,241,321 | 288    | Loss |
| DEL00018537 | chr2 | 93,316,652 | 93,318,028 | 1,376  | Loss |
| DEL00018541 | chr2 | 93,437,169 | 93,437,446 | 277    | Loss |
| DEL00018543 | chr2 | 93,509,214 | 93,509,998 | 784    | Loss |
| DEL00018549 | chr2 | 93,738,482 | 93,739,993 | 1,511  | Loss |
| DEL00018550 | chr2 | 93,775,234 | 93,775,349 | 115    | Loss |
| DEL00018551 | chr2 | 93,817,026 | 93,829,266 | 12,240 | Loss |
| DEL00018552 | chr2 | 93,838,192 | 93,838,783 | 591    | Loss |
| DEL00018555 | chr2 | 93,842,505 | 93,850,915 | 8,410  | Loss |
| DEL00018557 | chr2 | 93,857,375 | 93,857,467 | 92     | Loss |
| DEL00018558 | chr2 | 93,886,210 | 93,886,440 | 230    | Loss |
| DEL00018561 | chr2 | 93,889,550 | 93,889,831 | 281    | Loss |
| DEL00018567 | chr2 | 93,957,753 | 93,957,913 | 160    | Loss |
| DEL00018568 | chr2 | 93,978,371 | 93,978,432 | 61     | Loss |
| DEL00018570 | chr2 | 94,015,452 | 94,015,987 | 535    | Loss |
| DEL00018573 | chr2 | 94,100,882 | 94,101,011 | 129    | Loss |

|             |      |            |            |        |       |
|-------------|------|------------|------------|--------|-------|
| DEL00018574 | chr2 | 94,110,711 | 94,110,817 | 106    | Loss  |
| DEL00018575 | chr2 | 94,124,118 | 94,125,082 | 964    | Loss  |
| DEL00018579 | chr2 | 94,172,940 | 94,173,010 | 70     | Loss  |
| DEL00018580 | chr2 | 94,183,676 | 94,184,166 | 490    | Loss  |
| DEL00018582 | chr2 | 94,210,942 | 94,211,107 | 165    | Loss  |
| DEL00018584 | chr2 | 94,214,930 | 94,215,114 | 184    | Loss  |
| DEL00018585 | chr2 | 94,217,263 | 94,217,364 | 101    | Loss  |
| DEL00018592 | chr2 | 94,259,148 | 94,260,532 | 1,384  | Loss  |
| DEL00018593 | chr2 | 94,263,828 | 94,263,883 | 55     | Loss  |
| DEL00018596 | chr2 | 94,299,406 | 94,299,460 | 54     | Loss  |
| DEL00018597 | chr2 | 94,305,944 | 94,306,015 | 71     | Loss  |
| DUP00018608 | chr2 | 94,423,596 | 94,423,729 | 133    | Gain  |
| DEL00018613 | chr2 | 94,530,346 | 94,530,417 | 71     | Loss  |
| DEL00018614 | chr2 | 94,541,277 | 94,541,343 | 66     | Loss  |
| DEL00018626 | chr2 | 94,684,883 | 94,685,387 | 504    | Loss  |
| DUP00018629 | chr2 | 94,705,561 | 94,718,586 | 13,025 | Gain  |
| DEL00018630 | chr2 | 94,733,399 | 94,733,607 | 208    | Loss  |
| DEL00018632 | chr2 | 94,780,997 | 94,781,440 | 443    | Loss  |
| DUP00018641 | chr2 | 94,845,263 | 94,853,252 | 7,989  | Gain  |
| DEL00018646 | chr2 | 94,877,144 | 94,877,307 | 163    | Loss  |
| DEL00018647 | chr2 | 94,956,231 | 94,958,026 | 1,795  | Loss  |
| DUP00018648 | chr2 | 94,959,021 | 94,959,233 | 212    | Gain  |
| DEL00018650 | chr2 | 95,019,141 | 95,019,635 | 494    | Loss  |
| DEL00018651 | chr2 | 95,020,458 | 95,021,378 | 920    | Loss  |
| DEL00018653 | chr2 | 95,048,181 | 95,048,750 | 569    | Loss  |
| DEL00018668 | chr2 | 95,415,244 | 95,415,435 | 191    | Loss  |
| DEL00018675 | chr2 | 95,535,774 | 95,536,851 | 1,077  | Loss  |
| DEL00018677 | chr2 | 95,567,092 | 95,567,413 | 321    | Loss  |
| DEL00018678 | chr2 | 95,718,860 | 95,718,913 | 53     | Loss  |
| DEL00018683 | chr2 | 95,926,055 | 95,926,128 | 73     | Loss  |
| DEL00018685 | chr2 | 95,957,821 | 95,957,893 | 72     | Loss  |
| DEL00018693 | chr2 | 96,075,863 | 96,083,412 | 7,549  | Loss  |
| DEL00018697 | chr2 | 96,147,127 | 96,148,553 | 1,426  | Loss  |
| DEL00018700 | chr2 | 96,171,773 | 96,171,853 | 80     | Loss  |
| DEL00018705 | chr2 | 96,284,609 | 96,284,897 | 288    | Loss  |
| DEL00018708 | chr2 | 96,350,754 | 96,350,997 | 243    | Loss  |
| DEL00018713 | chr2 | 96,369,567 | 96,381,696 | 12,129 | Mixed |
| DEL00018770 | chr2 | 96,402,793 | 96,402,897 | 104    | Loss  |
| DEL00018777 | chr2 | 96,434,191 | 96,434,859 | 668    | Loss  |
| DEL00018784 | chr2 | 96,559,570 | 96,559,747 | 177    | Loss  |
| DEL00018785 | chr2 | 96,560,639 | 96,560,779 | 140    | Loss  |
| DEL00018791 | chr2 | 96,671,058 | 96,671,197 | 139    | Loss  |
| DEL00018794 | chr2 | 96,731,175 | 96,731,254 | 79     | Loss  |
| DEL00018795 | chr2 | 96,762,894 | 96,763,206 | 312    | Loss  |
| DEL00018798 | chr2 | 96,791,480 | 96,792,339 | 859    | Loss  |
| DEL00018802 | chr2 | 96,868,335 | 96,868,386 | 51     | Loss  |
| DEL00018809 | chr2 | 96,965,243 | 96,966,105 | 862    | Loss  |
| DEL00018813 | chr2 | 97,070,261 | 97,070,375 | 114    | Loss  |
| DEL00018815 | chr2 | 97,111,533 | 97,111,604 | 71     | Loss  |

|             |      |             |             |       |      |
|-------------|------|-------------|-------------|-------|------|
| DEL00018816 | chr2 | 97,116,219  | 97,116,446  | 227   | Loss |
| DEL00018819 | chr2 | 97,138,871  | 97,138,946  | 75    | Loss |
| DEL00018826 | chr2 | 97,280,469  | 97,280,619  | 150   | Loss |
| DEL00018836 | chr2 | 97,508,479  | 97,508,747  | 268   | Loss |
| DEL00018837 | chr2 | 97,528,263  | 97,528,365  | 102   | Loss |
| DEL00018838 | chr2 | 97,541,500  | 97,541,579  | 79    | Loss |
| DEL00018842 | chr2 | 97,608,539  | 97,608,597  | 58    | Loss |
| DEL00018843 | chr2 | 97,656,966  | 97,657,207  | 241   | Loss |
| DEL00018847 | chr2 | 97,813,665  | 97,814,388  | 723   | Loss |
| DEL00018849 | chr2 | 97,853,158  | 97,860,349  | 7,191 | Loss |
| DEL00018852 | chr2 | 97,894,424  | 97,894,493  | 69    | Loss |
| DEL00018863 | chr2 | 98,060,604  | 98,061,331  | 727   | Loss |
| DEL00018864 | chr2 | 98,085,983  | 98,086,047  | 64    | Loss |
| DEL00018865 | chr2 | 98,091,001  | 98,091,068  | 67    | Loss |
| DEL00018882 | chr2 | 98,543,858  | 98,544,038  | 180   | Loss |
| DEL00018887 | chr2 | 98,622,299  | 98,622,355  | 56    | Loss |
| DEL00018893 | chr2 | 98,727,478  | 98,727,643  | 165   | Loss |
| DEL00018898 | chr2 | 98,905,657  | 98,906,149  | 492   | Loss |
| DEL00018904 | chr2 | 99,113,162  | 99,113,724  | 562   | Loss |
| DEL00018909 | chr2 | 99,215,271  | 99,215,468  | 197   | Loss |
| DEL00018913 | chr2 | 99,314,256  | 99,314,314  | 58    | Loss |
| DEL00018921 | chr2 | 99,644,193  | 99,644,680  | 487   | Loss |
| DEL00018928 | chr2 | 99,807,069  | 99,807,145  | 76    | Loss |
| DEL00018929 | chr2 | 99,834,748  | 99,834,910  | 162   | Loss |
| DEL00018933 | chr2 | 99,892,482  | 99,892,662  | 180   | Loss |
| DEL00018944 | chr2 | 100,229,442 | 100,229,849 | 407   | Loss |
| DEL00018960 | chr2 | 100,559,899 | 100,559,984 | 85    | Loss |
| DEL00018963 | chr2 | 100,608,651 | 100,609,132 | 481   | Loss |
| DEL00018969 | chr2 | 100,693,261 | 100,693,328 | 67    | Loss |
| DEL00018974 | chr2 | 100,826,319 | 100,826,421 | 102   | Loss |
| DEL00018985 | chr2 | 100,931,510 | 100,931,604 | 94    | Loss |
| DEL00018992 | chr2 | 101,101,779 | 101,101,840 | 61    | Loss |
| DEL00018994 | chr2 | 101,118,426 | 101,118,520 | 94    | Loss |
| DEL00019009 | chr2 | 101,221,188 | 101,221,274 | 86    | Loss |
| DEL00019013 | chr2 | 101,270,342 | 101,270,404 | 62    | Loss |
| DEL00019024 | chr2 | 101,342,853 | 101,343,349 | 496   | Loss |
| DEL00019033 | chr2 | 101,491,632 | 101,491,771 | 139   | Loss |
| DEL00019036 | chr2 | 101,492,117 | 101,492,611 | 494   | Loss |
| DEL00019038 | chr2 | 101,494,935 | 101,495,597 | 662   | Loss |
| DEL00019041 | chr2 | 101,528,887 | 101,528,963 | 76    | Loss |
| DEL00019043 | chr2 | 101,574,352 | 101,574,725 | 373   | Loss |
| DEL00019044 | chr2 | 101,576,435 | 101,576,539 | 104   | Loss |
| DEL00019045 | chr2 | 101,592,894 | 101,593,323 | 429   | Loss |
| DEL00019075 | chr2 | 102,048,611 | 102,049,095 | 484   | Loss |
| DEL00019077 | chr2 | 102,060,966 | 102,061,338 | 372   | Loss |
| DEL00019080 | chr2 | 102,091,977 | 102,092,085 | 108   | Loss |
| DEL00019090 | chr2 | 102,289,538 | 102,289,697 | 159   | Loss |
| DEL00019092 | chr2 | 102,299,872 | 102,300,219 | 347   | Loss |
| DEL00019094 | chr2 | 102,331,512 | 102,331,569 | 57    | Loss |



|             |      |             |             |        |      |
|-------------|------|-------------|-------------|--------|------|
| DEL00019103 | chr2 | 102,442,658 | 102,446,419 | 3,761  | Loss |
| DEL00019107 | chr2 | 102,449,792 | 102,449,872 | 80     | Loss |
| DEL00019109 | chr2 | 102,481,435 | 102,481,580 | 145    | Loss |
| DEL00019113 | chr2 | 102,566,343 | 102,566,579 | 236    | Loss |
| DEL00019118 | chr2 | 102,640,419 | 102,640,710 | 291    | Loss |
| DUP00019120 | chr2 | 102,695,283 | 102,716,378 | 21,095 | Gain |
| DEL00019124 | chr2 | 102,821,342 | 102,821,841 | 499    | Loss |
| DEL00019127 | chr2 | 102,848,611 | 102,848,897 | 286    | Loss |
| DEL00019130 | chr2 | 102,860,716 | 102,861,078 | 362    | Loss |
| DEL00019134 | chr2 | 102,891,992 | 102,892,189 | 197    | Loss |
| DEL00019141 | chr2 | 103,026,795 | 103,026,890 | 95     | Loss |
| DEL00019142 | chr2 | 103,042,807 | 103,042,879 | 72     | Loss |
| DEL00019145 | chr2 | 103,070,043 | 103,070,384 | 341    | Loss |
| DEL00019146 | chr2 | 103,071,867 | 103,071,927 | 60     | Loss |
| DEL00019147 | chr2 | 103,075,848 | 103,076,102 | 254    | Loss |
| DEL00019156 | chr2 | 103,151,095 | 103,151,284 | 189    | Loss |
| DEL00019167 | chr2 | 103,342,079 | 103,342,399 | 320    | Loss |
| DEL00019172 | chr2 | 103,399,390 | 103,399,476 | 86     | Loss |
| DEL00019182 | chr2 | 103,876,547 | 103,876,611 | 64     | Loss |
| DEL00019184 | chr2 | 103,915,999 | 103,916,128 | 129    | Loss |
| DEL00019188 | chr2 | 104,123,834 | 104,124,407 | 573    | Loss |
| DEL00019193 | chr2 | 104,149,969 | 104,150,203 | 234    | Loss |
| DEL00019194 | chr2 | 104,188,764 | 104,189,340 | 576    | Loss |
| DEL00019196 | chr2 | 104,245,806 | 104,246,600 | 794    | Loss |
| DEL00019197 | chr2 | 104,333,911 | 104,334,015 | 104    | Loss |
| DEL00019201 | chr2 | 104,367,673 | 104,368,208 | 535    | Loss |
| DEL00019203 | chr2 | 104,402,402 | 104,402,896 | 494    | Loss |
| DEL00019215 | chr2 | 104,533,562 | 104,533,659 | 97     | Loss |
| DEL00019216 | chr2 | 104,543,224 | 104,543,282 | 58     | Loss |
| DEL00019220 | chr2 | 104,623,026 | 104,629,378 | 6,352  | Loss |
| DEL00019221 | chr2 | 104,708,325 | 104,708,493 | 168    | Loss |
| DUP00019230 | chr2 | 104,901,829 | 104,902,151 | 322    | Gain |
| DEL00019234 | chr2 | 104,974,100 | 104,974,190 | 90     | Loss |
| DEL00019235 | chr2 | 104,991,764 | 104,991,997 | 233    | Loss |
| DEL00019243 | chr2 | 105,065,186 | 105,065,238 | 52     | Loss |
| DEL00019249 | chr2 | 105,266,883 | 105,267,542 | 659    | Loss |
| DEL00019253 | chr2 | 105,445,042 | 105,445,595 | 553    | Loss |
| DEL00019254 | chr2 | 105,519,266 | 105,523,609 | 4,343  | Loss |
| DEL00019256 | chr2 | 105,608,746 | 105,610,498 | 1,752  | Loss |
| DUP00019258 | chr2 | 105,663,616 | 105,679,019 | 15,403 | Gain |
| DEL00019261 | chr2 | 105,726,497 | 105,726,911 | 414    | Loss |
| DEL00019264 | chr2 | 105,775,076 | 105,775,227 | 151    | Loss |
| DEL00019266 | chr2 | 105,814,798 | 105,815,283 | 485    | Loss |
| DEL00019273 | chr2 | 106,000,512 | 106,001,996 | 1,484  | Loss |
| DEL00019274 | chr2 | 106,005,155 | 106,005,579 | 424    | Loss |
| DEL00019294 | chr2 | 106,329,002 | 106,329,248 | 246    | Loss |
| DEL00019298 | chr2 | 106,441,482 | 106,441,570 | 88     | Loss |
| DEL00019301 | chr2 | 106,503,475 | 106,503,823 | 348    | Loss |
| DEL00019303 | chr2 | 106,556,803 | 106,556,918 | 115    | Loss |

|             |      |             |             |        |      |
|-------------|------|-------------|-------------|--------|------|
| DEL00019306 | chr2 | 106,614,344 | 106,614,830 | 486    | Loss |
| DEL00019310 | chr2 | 106,748,133 | 106,748,456 | 323    | Loss |
| DEL00019316 | chr2 | 106,916,001 | 106,916,502 | 501    | Loss |
| DEL00019321 | chr2 | 107,173,247 | 107,173,435 | 188    | Loss |
| DEL00019323 | chr2 | 107,223,952 | 107,224,427 | 475    | Loss |
| DEL00019340 | chr2 | 107,475,836 | 107,475,893 | 57     | Loss |
| DEL00019343 | chr2 | 107,492,442 | 107,492,880 | 438    | Loss |
| DEL00019346 | chr2 | 107,536,164 | 107,536,670 | 506    | Loss |
| DEL00019348 | chr2 | 107,545,945 | 107,546,873 | 928    | Loss |
| DEL00019352 | chr2 | 107,589,306 | 107,589,366 | 60     | Loss |
| DUP00019354 | chr2 | 107,756,635 | 107,756,718 | 83     | Gain |
| DEL00019355 | chr2 | 107,763,475 | 107,763,529 | 54     | Loss |
| DEL00019358 | chr2 | 107,857,853 | 107,858,002 | 149    | Loss |
| DEL00019359 | chr2 | 107,863,580 | 107,863,809 | 229    | Loss |
| DEL00019362 | chr2 | 107,877,063 | 107,877,155 | 92     | Loss |
| DEL00019372 | chr2 | 108,097,156 | 108,098,544 | 1,388  | Loss |
| DEL00019377 | chr2 | 108,207,012 | 108,207,072 | 60     | Loss |
| DEL00019389 | chr2 | 108,421,346 | 108,421,511 | 165    | Loss |
| DEL00019390 | chr2 | 108,449,243 | 108,449,303 | 60     | Loss |
| DEL00019404 | chr2 | 108,675,180 | 108,675,634 | 454    | Loss |
| DEL00019407 | chr2 | 108,818,768 | 108,818,986 | 218    | Loss |
| DEL00019408 | chr2 | 108,822,269 | 108,823,658 | 1,389  | Loss |
| DEL00019414 | chr2 | 109,038,842 | 109,038,985 | 143    | Loss |
| DEL00019415 | chr2 | 109,062,886 | 109,063,129 | 243    | Loss |
| DEL00019420 | chr2 | 109,146,143 | 109,146,644 | 501    | Loss |
| DEL00019422 | chr2 | 109,219,602 | 109,219,845 | 243    | Loss |
| DEL00019424 | chr2 | 109,231,948 | 109,237,638 | 5,690  | Loss |
| DEL00019436 | chr2 | 109,407,423 | 109,407,556 | 133    | Loss |
| DEL00019437 | chr2 | 109,427,234 | 109,427,508 | 274    | Loss |
| DEL00019442 | chr2 | 109,479,448 | 109,479,553 | 105    | Loss |
| DEL00019446 | chr2 | 109,582,025 | 109,583,501 | 1,476  | Loss |
| DEL00019447 | chr2 | 109,626,073 | 109,626,138 | 65     | Loss |
| DEL00019449 | chr2 | 109,627,280 | 109,630,643 | 3,363  | Loss |
| DEL00019453 | chr2 | 109,761,591 | 109,761,734 | 143    | Loss |
| DEL00019456 | chr2 | 109,830,493 | 109,848,543 | 18,050 | Loss |
| DEL00019463 | chr2 | 109,911,887 | 109,913,525 | 1,638  | Loss |
| DEL00019470 | chr2 | 110,031,905 | 110,032,234 | 329    | Loss |
| DEL00019489 | chr2 | 110,278,988 | 110,279,073 | 85     | Loss |
| DEL00019500 | chr2 | 110,466,294 | 110,466,459 | 165    | Loss |
| DEL00019501 | chr2 | 110,526,961 | 110,527,114 | 153    | Loss |
| DEL00019504 | chr2 | 110,542,071 | 110,542,270 | 199    | Loss |
| DEL00019505 | chr2 | 110,551,715 | 110,551,855 | 140    | Loss |
| DEL00019512 | chr2 | 110,589,164 | 110,589,216 | 52     | Loss |
| DEL00019513 | chr2 | 110,620,034 | 110,621,645 | 1,611  | Loss |
| DEL00019524 | chr2 | 110,826,930 | 110,827,042 | 112    | Loss |
| DEL00019531 | chr2 | 110,881,026 | 110,882,227 | 1,201  | Loss |
| DEL00019533 | chr2 | 110,885,146 | 110,885,658 | 512    | Loss |
| DUP00019539 | chr2 | 111,057,207 | 111,057,352 | 145    | Gain |
| DEL00019547 | chr2 | 111,433,625 | 111,434,279 | 654    | Loss |

|             |      |             |             |        |       |
|-------------|------|-------------|-------------|--------|-------|
| DEL00019551 | chr2 | 111,453,957 | 111,454,260 | 303    | Loss  |
| DEL00019556 | chr2 | 111,499,609 | 111,499,667 | 58     | Loss  |
| DEL00019558 | chr2 | 111,537,172 | 111,537,708 | 536    | Loss  |
| DEL00019559 | chr2 | 111,554,554 | 111,555,130 | 576    | Loss  |
| DEL00019561 | chr2 | 111,626,815 | 111,628,281 | 1,466  | Loss  |
| DEL00019566 | chr2 | 111,652,379 | 111,655,127 | 2,748  | Loss  |
| DEL00019567 | chr2 | 111,712,936 | 111,713,076 | 140    | Loss  |
| DEL00019573 | chr2 | 111,798,582 | 111,798,638 | 56     | Loss  |
| DEL00019575 | chr2 | 111,812,889 | 111,849,562 | 36,673 | Loss  |
| DEL00019582 | chr2 | 111,866,811 | 111,866,934 | 123    | Loss  |
| DEL00019587 | chr2 | 111,997,928 | 111,998,078 | 150    | Loss  |
| DEL00019590 | chr2 | 112,069,077 | 112,069,462 | 385    | Loss  |
| DEL00019600 | chr2 | 112,129,073 | 112,129,260 | 187    | Loss  |
| DEL00019605 | chr2 | 112,241,543 | 112,241,792 | 249    | Loss  |
| DEL00019609 | chr2 | 112,498,716 | 112,498,796 | 80     | Loss  |
| DEL00019616 | chr2 | 112,533,272 | 112,533,323 | 51     | Loss  |
| DEL00019627 | chr2 | 112,769,266 | 112,770,138 | 872    | Loss  |
| DEL00019632 | chr2 | 112,840,673 | 112,841,154 | 481    | Loss  |
| DEL00019633 | chr2 | 112,887,071 | 112,888,148 | 1,077  | Loss  |
| DEL00019634 | chr2 | 112,919,284 | 112,920,352 | 1,068  | Loss  |
| DEL00019635 | chr2 | 112,922,098 | 112,922,178 | 80     | Loss  |
| DEL00019637 | chr2 | 112,954,703 | 112,954,812 | 109    | Loss  |
| DEL00019642 | chr2 | 113,073,618 | 113,074,321 | 703    | Loss  |
| DEL00019651 | chr2 | 113,221,051 | 113,221,164 | 113    | Loss  |
| DEL00019652 | chr2 | 113,227,120 | 113,227,184 | 64     | Loss  |
| DEL00019661 | chr2 | 113,376,770 | 113,377,074 | 304    | Loss  |
| DEL00019662 | chr2 | 113,423,254 | 113,423,382 | 128    | Loss  |
| DEL00019667 | chr2 | 113,571,374 | 113,571,880 | 506    | Loss  |
| DEL00019668 | chr2 | 113,613,222 | 113,613,628 | 406    | Loss  |
| DEL00019674 | chr2 | 113,660,051 | 113,660,376 | 325    | Loss  |
| DEL00019675 | chr2 | 113,687,223 | 113,687,434 | 211    | Loss  |
| DUP00019677 | chr2 | 113,714,146 | 113,728,705 | 14,559 | Mixed |
| DEL00019679 | chr2 | 113,730,492 | 113,730,595 | 103    | Loss  |
| DEL00019682 | chr2 | 113,776,891 | 113,777,485 | 594    | Loss  |
| DEL00019691 | chr2 | 113,908,282 | 113,908,377 | 95     | Loss  |
| DEL00019695 | chr2 | 114,001,879 | 114,002,164 | 285    | Loss  |
| DEL00019697 | chr2 | 114,051,626 | 114,052,143 | 517    | Loss  |
| DEL00019701 | chr2 | 114,088,984 | 114,089,521 | 537    | Loss  |
| DUP00019707 | chr2 | 114,210,484 | 114,223,834 | 13,350 | Gain  |
| DEL00019715 | chr2 | 114,538,572 | 114,538,711 | 139    | Loss  |
| DEL00019716 | chr2 | 114,546,960 | 114,547,594 | 634    | Loss  |
| DEL00019720 | chr2 | 114,595,616 | 114,595,744 | 128    | Loss  |
| DEL00019729 | chr2 | 114,767,697 | 114,768,950 | 1,253  | Loss  |
| DUP00019744 | chr2 | 115,009,726 | 115,012,775 | 3,049  | Gain  |
| DUP00019799 | chr2 | 115,338,942 | 115,364,896 | 25,954 | Gain  |
| DEL00019805 | chr2 | 115,408,235 | 115,408,421 | 186    | Loss  |
| DEL00019808 | chr2 | 115,436,774 | 115,437,353 | 579    | Loss  |
| DEL00019810 | chr2 | 115,447,427 | 115,447,698 | 271    | Loss  |
| DEL00019816 | chr2 | 115,475,113 | 115,475,336 | 223    | Loss  |

|             |      |             |             |        |      |
|-------------|------|-------------|-------------|--------|------|
| DEL00019819 | chr2 | 115,593,877 | 115,593,964 | 87     | Loss |
| DEL00019820 | chr2 | 115,601,609 | 115,602,430 | 821    | Loss |
| DEL00019821 | chr2 | 115,626,641 | 115,626,698 | 57     | Loss |
| DEL00019823 | chr2 | 115,636,941 | 115,637,128 | 187    | Loss |
| DEL00019828 | chr2 | 115,665,510 | 115,666,046 | 536    | Loss |
| DEL00019830 | chr2 | 115,676,464 | 115,676,931 | 467    | Loss |
| DEL00019835 | chr2 | 115,703,608 | 115,703,838 | 230    | Loss |
| DEL00019840 | chr2 | 115,788,774 | 115,788,828 | 54     | Loss |
| DEL00019841 | chr2 | 115,818,509 | 115,818,563 | 54     | Loss |
| DEL00019842 | chr2 | 115,824,001 | 115,824,059 | 58     | Loss |
| DEL00019844 | chr2 | 115,855,496 | 115,855,832 | 336    | Loss |
| DEL00019847 | chr2 | 115,942,829 | 115,952,989 | 10,160 | Loss |
| DEL00019850 | chr2 | 115,978,910 | 115,979,664 | 754    | Loss |
| DEL00019853 | chr2 | 116,027,125 | 116,027,306 | 181    | Loss |
| DEL00019854 | chr2 | 116,039,082 | 116,039,319 | 237    | Loss |
| DEL00019857 | chr2 | 116,083,599 | 116,083,720 | 121    | Loss |
| DUP00019861 | chr2 | 116,200,967 | 116,214,187 | 13,220 | Gain |
| DEL00019868 | chr2 | 116,353,587 | 116,353,964 | 377    | Loss |
| DEL00019873 | chr2 | 116,475,142 | 116,475,610 | 468    | Loss |
| DEL00019876 | chr2 | 116,505,215 | 116,505,328 | 113    | Loss |
| DEL00019877 | chr2 | 116,516,292 | 116,517,502 | 1,210  | Loss |
| DEL00019881 | chr2 | 116,551,765 | 116,551,821 | 56     | Loss |
| DEL00019883 | chr2 | 116,563,510 | 116,563,653 | 143    | Loss |
| DEL00019885 | chr2 | 116,588,111 | 116,588,248 | 137    | Loss |
| DEL00019889 | chr2 | 116,679,235 | 116,679,371 | 136    | Loss |
| DEL00019890 | chr2 | 116,735,982 | 116,736,086 | 104    | Loss |
| DEL00019893 | chr2 | 116,825,859 | 116,825,932 | 73     | Loss |
| DEL00019894 | chr2 | 116,830,698 | 116,831,233 | 535    | Loss |
| DEL00019897 | chr2 | 116,866,182 | 116,866,252 | 70     | Loss |
| DEL00019900 | chr2 | 116,953,026 | 116,953,096 | 70     | Loss |
| DEL00019907 | chr2 | 117,241,781 | 117,242,369 | 588    | Loss |
| DEL00019913 | chr2 | 117,278,941 | 117,279,149 | 208    | Loss |
| DEL00019914 | chr2 | 117,279,387 | 117,279,490 | 103    | Loss |
| DEL00019916 | chr2 | 117,315,802 | 117,316,785 | 983    | Loss |
| DEL00019917 | chr2 | 117,325,610 | 117,327,493 | 1,883  | Loss |
| DEL00019924 | chr2 | 117,494,201 | 117,495,271 | 1,070  | Loss |
| DEL00019926 | chr2 | 117,561,231 | 117,561,363 | 132    | Loss |
| DEL00019929 | chr2 | 117,580,636 | 117,581,455 | 819    | Loss |
| DEL00019930 | chr2 | 117,591,541 | 117,591,691 | 150    | Loss |
| DUP00019931 | chr2 | 117,705,999 | 117,706,076 | 77     | Gain |
| DEL00019932 | chr2 | 117,709,484 | 117,709,538 | 54     | Loss |
| DEL00019938 | chr2 | 117,783,558 | 117,784,001 | 443    | Loss |
| DEL00019942 | chr2 | 117,795,186 | 117,795,530 | 344    | Loss |
| DEL00019950 | chr2 | 117,994,078 | 117,994,249 | 171    | Loss |
| DEL00019953 | chr2 | 118,012,707 | 118,013,896 | 1,189  | Loss |
| DEL00019955 | chr2 | 118,027,476 | 118,027,558 | 82     | Loss |
| DEL00019962 | chr2 | 118,115,819 | 118,115,879 | 60     | Loss |
| DEL00019964 | chr2 | 118,148,023 | 118,148,106 | 83     | Loss |
| DEL00019966 | chr2 | 118,250,643 | 118,250,758 | 115    | Loss |

|             |      |             |             |       |      |
|-------------|------|-------------|-------------|-------|------|
| DEL00019969 | chr2 | 118,291,900 | 118,291,995 | 95    | Loss |
| DEL00019970 | chr2 | 118,317,385 | 118,317,501 | 116   | Loss |
| DEL00019971 | chr2 | 118,321,682 | 118,321,766 | 84    | Loss |
| DEL00019974 | chr2 | 118,458,387 | 118,459,298 | 911   | Loss |
| DEL00019976 | chr2 | 118,479,848 | 118,480,112 | 264   | Loss |
| DEL00019979 | chr2 | 118,542,038 | 118,542,529 | 491   | Loss |
| DEL00019980 | chr2 | 118,550,810 | 118,551,410 | 600   | Loss |
| DEL00019984 | chr2 | 118,590,504 | 118,590,852 | 348   | Loss |
| DEL00019985 | chr2 | 118,641,904 | 118,641,969 | 65    | Loss |
| DEL00019988 | chr2 | 118,662,909 | 118,663,592 | 683   | Loss |
| DEL00019992 | chr2 | 118,728,639 | 118,728,779 | 140   | Loss |
| DEL00019994 | chr2 | 118,733,555 | 118,733,643 | 88    | Loss |
| DEL00019995 | chr2 | 118,831,556 | 118,831,614 | 58    | Loss |
| DEL00020000 | chr2 | 118,974,073 | 118,978,542 | 4,469 | Loss |
| DEL00020003 | chr2 | 119,022,084 | 119,022,174 | 90    | Loss |
| DEL00020007 | chr2 | 119,139,052 | 119,139,838 | 786   | Loss |
| DEL00020011 | chr2 | 119,305,246 | 119,314,758 | 9,512 | Loss |
| DEL00020019 | chr2 | 119,475,171 | 119,475,365 | 194   | Loss |
| DEL00020026 | chr2 | 119,666,667 | 119,666,905 | 238   | Loss |
| DEL00020028 | chr2 | 119,678,920 | 119,679,052 | 132   | Loss |
| DEL00020030 | chr2 | 119,726,158 | 119,728,616 | 2,458 | Loss |
| DEL00020042 | chr2 | 119,821,639 | 119,822,087 | 448   | Loss |
| DEL00020045 | chr2 | 119,866,372 | 119,866,518 | 146   | Loss |
| DEL00020060 | chr2 | 120,256,771 | 120,257,102 | 331   | Loss |
| DEL00020063 | chr2 | 120,272,784 | 120,273,321 | 537   | Loss |
| DEL00020075 | chr2 | 120,476,810 | 120,477,049 | 239   | Loss |
| DEL00020090 | chr2 | 120,621,403 | 120,621,454 | 51    | Loss |
| DEL00020106 | chr2 | 120,777,135 | 120,777,210 | 75    | Loss |
| DEL00020127 | chr2 | 120,958,930 | 120,961,257 | 2,327 | Loss |
| DEL00020129 | chr2 | 120,973,160 | 120,973,375 | 215   | Loss |
| DEL00020140 | chr2 | 121,180,559 | 121,180,625 | 66    | Loss |
| DEL00020146 | chr2 | 121,245,139 | 121,246,130 | 991   | Loss |
| DEL00020147 | chr2 | 121,278,073 | 121,278,320 | 247   | Loss |
| DEL00020150 | chr2 | 121,342,673 | 121,342,953 | 280   | Loss |
| DEL00020153 | chr2 | 121,361,237 | 121,361,360 | 123   | Loss |
| DEL00020154 | chr2 | 121,384,585 | 121,385,070 | 485   | Loss |
| DEL00020155 | chr2 | 121,388,703 | 121,388,867 | 164   | Loss |
| DEL00020164 | chr2 | 121,560,986 | 121,561,516 | 530   | Loss |
| DEL00020167 | chr2 | 121,585,201 | 121,585,693 | 492   | Loss |
| DEL00020172 | chr2 | 121,640,981 | 121,641,074 | 93    | Loss |
| DEL00020180 | chr2 | 121,818,544 | 121,818,603 | 59    | Loss |
| DEL00020181 | chr2 | 121,871,163 | 121,871,240 | 77    | Loss |
| DEL00020186 | chr2 | 121,964,813 | 121,964,885 | 72    | Loss |
| DEL00020188 | chr2 | 122,007,499 | 122,007,761 | 262   | Loss |
| DEL00020190 | chr2 | 122,054,055 | 122,054,398 | 343   | Loss |
| DEL00020200 | chr2 | 122,187,542 | 122,188,465 | 923   | Loss |
| DEL00020203 | chr2 | 122,285,756 | 122,286,554 | 798   | Loss |
| DEL00020207 | chr2 | 122,346,323 | 122,346,548 | 225   | Loss |
| DEL00020210 | chr2 | 122,379,679 | 122,379,746 | 67    | Loss |

|             |      |             |             |       |      |
|-------------|------|-------------|-------------|-------|------|
| DEL00020211 | chr2 | 122,403,065 | 122,403,217 | 152   | Loss |
| DEL00020212 | chr2 | 122,427,223 | 122,427,274 | 51    | Loss |
| DEL00020219 | chr2 | 122,549,008 | 122,549,436 | 428   | Loss |
| DUP00020225 | chr2 | 122,612,722 | 122,612,796 | 74    | Gain |
| DEL00020231 | chr2 | 122,642,929 | 122,643,108 | 179   | Loss |
| DEL00020232 | chr2 | 122,653,615 | 122,654,442 | 827   | Loss |
| DEL00020236 | chr2 | 122,693,188 | 122,693,423 | 235   | Loss |
| DEL00020238 | chr2 | 122,736,175 | 122,736,392 | 217   | Loss |
| DEL00020244 | chr2 | 122,907,705 | 122,907,776 | 71    | Loss |
| DEL00020245 | chr2 | 122,912,268 | 122,912,432 | 164   | Loss |
| DEL00020249 | chr2 | 122,990,824 | 122,990,903 | 79    | Loss |
| DEL00020250 | chr2 | 123,085,547 | 123,085,678 | 131   | Loss |
| DEL00020259 | chr2 | 123,204,965 | 123,205,060 | 95    | Loss |
| DEL00020260 | chr2 | 123,216,875 | 123,217,416 | 541   | Loss |
| DEL00020264 | chr2 | 123,249,722 | 123,250,177 | 455   | Loss |
| DEL00020267 | chr2 | 123,316,485 | 123,316,537 | 52    | Loss |
| DEL00020270 | chr2 | 123,366,830 | 123,367,136 | 306   | Loss |
| DEL00020271 | chr2 | 123,401,156 | 123,401,236 | 80    | Loss |
| DEL00020272 | chr2 | 123,403,799 | 123,405,055 | 1,256 | Loss |
| DEL00020274 | chr2 | 123,489,064 | 123,490,074 | 1,010 | Loss |
| DEL00020277 | chr2 | 123,612,554 | 123,612,900 | 346   | Loss |
| DEL00020279 | chr2 | 123,654,337 | 123,654,402 | 65    | Loss |
| DEL00020283 | chr2 | 123,697,105 | 123,698,154 | 1,049 | Loss |
| DEL00020284 | chr2 | 123,703,576 | 123,704,498 | 922   | Loss |
| DEL00020292 | chr2 | 123,803,527 | 123,803,987 | 460   | Loss |
| DEL00020295 | chr2 | 123,804,346 | 123,805,024 | 678   | Loss |
| DEL00020299 | chr2 | 123,874,720 | 123,874,779 | 59    | Loss |
| DEL00020308 | chr2 | 124,030,201 | 124,030,553 | 352   | Loss |
| DEL00020312 | chr2 | 124,086,110 | 124,086,583 | 473   | Loss |
| DEL00020314 | chr2 | 124,102,970 | 124,103,263 | 293   | Loss |
| DEL00020318 | chr2 | 124,120,855 | 124,121,289 | 434   | Loss |
| DEL00020325 | chr2 | 124,146,396 | 124,146,706 | 310   | Loss |
| DEL00020331 | chr2 | 124,199,563 | 124,205,754 | 6,191 | Loss |
| DEL00020334 | chr2 | 124,245,810 | 124,246,323 | 513   | Loss |
| DEL00020341 | chr2 | 124,332,187 | 124,332,720 | 533   | Loss |
| DEL00020344 | chr2 | 124,373,473 | 124,373,703 | 230   | Loss |
| DEL00020352 | chr2 | 124,525,911 | 124,526,604 | 693   | Loss |
| DEL00020365 | chr2 | 124,690,767 | 124,690,818 | 51    | Loss |
| DEL00020369 | chr2 | 124,723,395 | 124,723,577 | 182   | Loss |
| DEL00020371 | chr2 | 124,733,459 | 124,733,575 | 116   | Loss |
| DEL00020379 | chr2 | 124,802,163 | 124,802,827 | 664   | Loss |
| DEL00020381 | chr2 | 124,821,683 | 124,822,159 | 476   | Loss |
| DEL00020386 | chr2 | 124,886,338 | 124,887,437 | 1,099 | Loss |
| DEL00020396 | chr2 | 124,982,814 | 124,983,310 | 496   | Loss |
| DEL00020400 | chr2 | 125,082,416 | 125,082,507 | 91    | Loss |
| DEL00020406 | chr2 | 125,192,112 | 125,192,183 | 71    | Loss |
| DEL00020416 | chr2 | 125,356,469 | 125,356,533 | 64    | Loss |
| DEL00020417 | chr2 | 125,366,759 | 125,366,992 | 233   | Loss |
| DEL00020418 | chr2 | 125,390,714 | 125,391,293 | 579   | Loss |

|             |      |             |             |       |      |
|-------------|------|-------------|-------------|-------|------|
| DEL00020419 | chr2 | 125,406,274 | 125,406,329 | 55    | Loss |
| DEL00020433 | chr2 | 125,630,840 | 125,630,941 | 101   | Loss |
| DEL00020434 | chr2 | 125,669,322 | 125,669,402 | 80    | Loss |
| DEL00020435 | chr2 | 125,682,721 | 125,683,291 | 570   | Loss |
| DEL00020445 | chr2 | 125,808,015 | 125,808,081 | 66    | Loss |
| DEL00020452 | chr2 | 125,874,079 | 125,874,137 | 58    | Loss |
| DEL00020461 | chr2 | 125,976,386 | 125,978,025 | 1,639 | Loss |
| DEL00020464 | chr2 | 125,984,366 | 125,984,430 | 64    | Loss |
| DEL00020466 | chr2 | 126,040,396 | 126,040,862 | 466   | Loss |
| DEL00020467 | chr2 | 126,045,605 | 126,048,269 | 2,664 | Loss |
| DEL00020472 | chr2 | 126,090,213 | 126,090,292 | 79    | Loss |
| DEL00020473 | chr2 | 126,130,121 | 126,130,909 | 788   | Loss |
| DEL00020479 | chr2 | 126,348,393 | 126,348,538 | 145   | Loss |
| DEL00020486 | chr2 | 126,399,777 | 126,399,911 | 134   | Loss |
| DEL00020487 | chr2 | 126,416,938 | 126,417,410 | 472   | Loss |
| DEL00020498 | chr2 | 126,512,013 | 126,512,287 | 274   | Loss |
| DEL00020502 | chr2 | 126,653,523 | 126,653,576 | 53    | Loss |
| DEL00020507 | chr2 | 126,702,911 | 126,703,118 | 207   | Loss |
| DEL00020509 | chr2 | 126,820,666 | 126,821,297 | 631   | Loss |
| DEL00020511 | chr2 | 126,821,874 | 126,821,938 | 64    | Loss |
| DEL00020512 | chr2 | 126,822,502 | 126,822,773 | 271   | Loss |
| DEL00020513 | chr2 | 126,827,791 | 126,827,862 | 71    | Loss |
| DEL00020514 | chr2 | 126,829,427 | 126,829,500 | 73    | Loss |
| DEL00020526 | chr2 | 126,929,745 | 126,929,991 | 246   | Loss |
| DEL00020527 | chr2 | 126,946,948 | 126,947,038 | 90    | Loss |
| DEL00020531 | chr2 | 126,993,411 | 126,993,503 | 92    | Loss |
| DEL00020533 | chr2 | 127,043,389 | 127,044,136 | 747   | Loss |
| DEL00020535 | chr2 | 127,051,459 | 127,051,994 | 535   | Loss |
| DEL00020537 | chr2 | 127,053,603 | 127,053,885 | 282   | Loss |
| DEL00020545 | chr2 | 127,120,468 | 127,120,579 | 111   | Loss |
| DEL00020546 | chr2 | 127,126,125 | 127,126,283 | 158   | Loss |
| DEL00020552 | chr2 | 127,169,776 | 127,169,827 | 51    | Loss |
| DEL00020559 | chr2 | 127,203,467 | 127,204,187 | 720   | Loss |
| DEL00020561 | chr2 | 127,240,632 | 127,241,491 | 859   | Loss |
| DEL00020562 | chr2 | 127,252,410 | 127,252,481 | 71    | Loss |
| DEL00020574 | chr2 | 127,349,508 | 127,350,795 | 1,287 | Loss |
| DEL00020580 | chr2 | 127,375,926 | 127,379,068 | 3,142 | Loss |
| DEL00020581 | chr2 | 127,386,339 | 127,386,427 | 88    | Loss |
| DEL00020586 | chr2 | 127,473,425 | 127,473,839 | 414   | Loss |
| DEL00020587 | chr2 | 127,475,903 | 127,476,433 | 530   | Loss |
| DEL00020593 | chr2 | 127,570,859 | 127,570,965 | 106   | Loss |
| DEL00020594 | chr2 | 127,586,116 | 127,586,402 | 286   | Loss |
| DEL00020595 | chr2 | 127,603,723 | 127,603,970 | 247   | Loss |
| DEL00020597 | chr2 | 127,626,761 | 127,626,836 | 75    | Loss |
| DEL00020601 | chr2 | 127,685,752 | 127,685,993 | 241   | Loss |
| DEL00020603 | chr2 | 127,735,970 | 127,736,066 | 96    | Loss |
| DEL00020605 | chr2 | 127,778,677 | 127,778,785 | 108   | Loss |
| DEL00020606 | chr2 | 127,819,695 | 127,819,761 | 66    | Loss |
| DEL00020607 | chr2 | 127,851,680 | 127,851,889 | 209   | Loss |

|             |      |             |             |        |      |
|-------------|------|-------------|-------------|--------|------|
| DEL00020612 | chr2 | 127,901,049 | 127,901,132 | 83     | Loss |
| DEL00020613 | chr2 | 127,932,380 | 127,932,499 | 119    | Loss |
| DEL00020615 | chr2 | 127,944,146 | 127,944,831 | 685    | Loss |
| DEL00020617 | chr2 | 128,006,012 | 128,006,209 | 197    | Loss |
| DEL00020623 | chr2 | 128,098,474 | 128,098,938 | 464    | Loss |
| DEL00020629 | chr2 | 128,125,555 | 128,125,655 | 100    | Loss |
| DEL00020630 | chr2 | 128,126,231 | 128,126,743 | 512    | Loss |
| DEL00020635 | chr2 | 128,277,161 | 128,277,279 | 118    | Loss |
| DEL00020651 | chr2 | 128,554,367 | 128,554,820 | 453    | Loss |
| DEL00020654 | chr2 | 128,566,491 | 128,566,739 | 248    | Loss |
| DEL00020658 | chr2 | 128,669,822 | 128,669,957 | 135    | Loss |
| DEL00020659 | chr2 | 128,683,179 | 128,683,234 | 55     | Loss |
| DEL00020670 | chr2 | 128,845,217 | 128,845,346 | 129    | Loss |
| DUP00020671 | chr2 | 128,901,164 | 128,901,271 | 107    | Gain |
| DEL00020679 | chr2 | 129,105,290 | 129,105,413 | 123    | Loss |
| DUP00020690 | chr2 | 129,356,506 | 129,432,555 | 76,049 | Gain |
| DEL00020697 | chr2 | 129,616,799 | 129,616,997 | 198    | Loss |
| DUP00020699 | chr2 | 129,669,542 | 129,674,617 | 5,075  | Gain |
| DEL00020700 | chr2 | 129,769,771 | 129,769,833 | 62     | Loss |
| DEL00020701 | chr2 | 129,831,934 | 129,831,986 | 52     | Loss |
| DEL00020704 | chr2 | 129,866,232 | 129,866,441 | 209    | Loss |
| DEL00020705 | chr2 | 129,873,813 | 129,873,866 | 53     | Loss |
| DEL00020708 | chr2 | 129,917,902 | 129,918,048 | 146    | Loss |
| DEL00020712 | chr2 | 129,946,271 | 129,946,803 | 532    | Loss |
| DEL00020715 | chr2 | 129,947,248 | 129,948,301 | 1,053  | Loss |
| DEL00020716 | chr2 | 129,964,303 | 129,964,525 | 222    | Loss |
| DEL00020724 | chr2 | 130,039,217 | 130,039,530 | 313    | Loss |
| DEL00020727 | chr2 | 130,164,047 | 130,164,171 | 124    | Loss |
| DEL00020733 | chr2 | 130,326,388 | 130,332,261 | 5,873  | Loss |
| DEL00020736 | chr2 | 130,354,758 | 130,356,486 | 1,728  | Loss |
| DEL00020738 | chr2 | 130,379,331 | 130,379,421 | 90     | Loss |
| DEL00020741 | chr2 | 130,494,345 | 130,494,505 | 160    | Loss |
| DEL00020749 | chr2 | 130,702,482 | 130,702,631 | 149    | Loss |
| DEL00020752 | chr2 | 130,717,924 | 130,717,990 | 66     | Loss |
| DEL00020754 | chr2 | 130,767,780 | 130,768,154 | 374    | Loss |
| DEL00020757 | chr2 | 130,796,344 | 130,796,995 | 651    | Loss |
| DEL00020758 | chr2 | 130,827,830 | 130,829,329 | 1,499  | Loss |
| DEL00020763 | chr2 | 130,946,333 | 130,946,860 | 527    | Loss |
| DEL00020765 | chr2 | 130,960,661 | 130,960,895 | 234    | Loss |
| DEL00020768 | chr2 | 131,026,901 | 131,027,252 | 351    | Loss |
| DEL00020771 | chr2 | 131,034,979 | 131,035,431 | 452    | Loss |
| DEL00020772 | chr2 | 131,038,066 | 131,038,431 | 365    | Loss |
| DEL00020779 | chr2 | 131,151,675 | 131,152,348 | 673    | Loss |
| DEL00020781 | chr2 | 131,174,864 | 131,175,470 | 606    | Loss |
| DEL00020785 | chr2 | 131,242,389 | 131,242,500 | 111    | Loss |
| DEL00020795 | chr2 | 131,296,571 | 131,296,954 | 383    | Loss |
| DEL00020798 | chr2 | 131,349,032 | 131,349,386 | 354    | Loss |
| DEL00020804 | chr2 | 131,358,302 | 131,358,657 | 355    | Loss |
| DEL00020807 | chr2 | 131,392,725 | 131,393,046 | 321    | Loss |



|             |      |             |             |       |      |
|-------------|------|-------------|-------------|-------|------|
| DEL00020808 | chr2 | 131,406,906 | 131,407,508 | 602   | Loss |
| DEL00020810 | chr2 | 131,415,534 | 131,415,755 | 221   | Loss |
| DEL00020811 | chr2 | 131,425,127 | 131,425,210 | 83    | Loss |
| DEL00020813 | chr2 | 131,440,621 | 131,440,679 | 58    | Loss |
| DEL00020818 | chr2 | 131,491,540 | 131,492,032 | 492   | Loss |
| DEL00020822 | chr2 | 131,513,130 | 131,513,208 | 78    | Loss |
| DEL00020841 | chr2 | 131,685,405 | 131,685,501 | 96    | Loss |
| DEL00020842 | chr2 | 131,688,200 | 131,688,382 | 182   | Loss |
| DEL00020844 | chr2 | 131,701,520 | 131,701,786 | 266   | Loss |
| DEL00020846 | chr2 | 131,774,473 | 131,774,779 | 306   | Loss |
| DEL00020849 | chr2 | 131,788,357 | 131,788,495 | 138   | Loss |
| DEL00020851 | chr2 | 131,821,954 | 131,822,114 | 160   | Loss |
| DEL00020854 | chr2 | 131,877,111 | 131,877,299 | 188   | Loss |
| DEL00020855 | chr2 | 131,901,815 | 131,902,266 | 451   | Loss |
| DEL00020859 | chr2 | 131,987,173 | 131,987,276 | 103   | Loss |
| DEL00020870 | chr2 | 132,041,805 | 132,041,944 | 139   | Loss |
| DEL00020882 | chr2 | 132,123,431 | 132,123,487 | 56    | Loss |
| DEL00020885 | chr2 | 132,161,730 | 132,161,842 | 112   | Loss |
| DEL00020888 | chr2 | 132,234,241 | 132,234,801 | 560   | Loss |
| DEL00020890 | chr2 | 132,240,209 | 132,240,495 | 286   | Loss |
| DEL00020892 | chr2 | 132,295,008 | 132,295,066 | 58    | Loss |
| DEL00020894 | chr2 | 132,317,578 | 132,317,661 | 83    | Loss |
| DUP00020899 | chr2 | 132,423,896 | 132,424,052 | 156   | Gain |
| DEL00020900 | chr2 | 132,434,916 | 132,435,479 | 563   | Loss |
| DEL00020905 | chr2 | 132,513,841 | 132,514,155 | 314   | Loss |
| DEL00020909 | chr2 | 132,540,390 | 132,541,351 | 961   | Loss |
| DEL00020910 | chr2 | 132,549,639 | 132,553,159 | 3,520 | Loss |
| DEL00020914 | chr2 | 132,602,547 | 132,602,600 | 53    | Loss |
| DEL00020917 | chr2 | 132,687,825 | 132,689,069 | 1,244 | Loss |
| DEL00020918 | chr2 | 132,698,076 | 132,698,134 | 58    | Loss |
| DEL00020919 | chr2 | 132,698,831 | 132,698,900 | 69    | Loss |
| DEL00020929 | chr2 | 132,760,616 | 132,760,701 | 85    | Loss |
| DEL00020930 | chr2 | 132,777,310 | 132,777,478 | 168   | Loss |
| DEL00020931 | chr2 | 132,794,508 | 132,795,454 | 946   | Loss |
| DEL00020932 | chr2 | 132,796,526 | 132,803,173 | 6,647 | Loss |
| DEL00020935 | chr2 | 132,804,872 | 132,805,606 | 734   | Loss |
| DEL00020936 | chr2 | 132,861,818 | 132,862,572 | 754   | Loss |
| DEL00020939 | chr2 | 132,904,643 | 132,904,816 | 173   | Loss |
| DUP00020940 | chr2 | 132,930,862 | 132,931,302 | 440   | Gain |
| DEL00020947 | chr2 | 133,004,939 | 133,005,081 | 142   | Loss |
| DEL00020948 | chr2 | 133,028,362 | 133,029,165 | 803   | Loss |
| DEL00020950 | chr2 | 133,051,396 | 133,059,530 | 8,134 | Loss |
| DEL00020953 | chr2 | 133,143,809 | 133,144,122 | 313   | Loss |
| DEL00020954 | chr2 | 133,148,804 | 133,149,589 | 785   | Loss |
| DEL00020955 | chr2 | 133,181,688 | 133,184,031 | 2,343 | Loss |
| DEL00020957 | chr2 | 133,379,495 | 133,379,619 | 124   | Loss |
| DEL00020961 | chr2 | 133,420,157 | 133,420,964 | 807   | Loss |
| DEL00020973 | chr2 | 133,562,031 | 133,562,264 | 233   | Loss |
| DEL00020974 | chr2 | 133,589,905 | 133,589,958 | 53    | Loss |

|             |      |             |             |       |      |
|-------------|------|-------------|-------------|-------|------|
| DEL00020980 | chr2 | 133,730,171 | 133,731,728 | 1,557 | Loss |
| DEL00020981 | chr2 | 133,737,438 | 133,742,461 | 5,023 | Loss |
| DEL00020984 | chr2 | 133,757,369 | 133,757,520 | 151   | Loss |
| DEL00020989 | chr2 | 133,818,991 | 133,819,157 | 166   | Loss |
| DEL00020997 | chr2 | 133,857,991 | 133,858,622 | 631   | Loss |
| DEL00021000 | chr2 | 133,873,904 | 133,874,691 | 787   | Loss |
| DEL00021006 | chr2 | 133,983,310 | 133,983,537 | 227   | Loss |
| DEL00021009 | chr2 | 133,993,641 | 133,993,742 | 101   | Loss |
| DEL00021014 | chr2 | 134,036,738 | 134,037,143 | 405   | Loss |
| DEL00021015 | chr2 | 134,047,789 | 134,047,888 | 99    | Loss |
| DEL00021016 | chr2 | 134,053,196 | 134,054,506 | 1,310 | Loss |
| DEL00021017 | chr2 | 134,064,206 | 134,065,267 | 1,061 | Loss |
| DEL00021018 | chr2 | 134,075,467 | 134,075,805 | 338   | Loss |
| DEL00021020 | chr2 | 134,083,220 | 134,083,471 | 251   | Loss |
| DEL00021021 | chr2 | 134,086,223 | 134,087,252 | 1,029 | Loss |
| DEL00021024 | chr2 | 134,118,277 | 134,122,360 | 4,083 | Loss |
| DEL00021025 | chr2 | 134,130,616 | 134,132,490 | 1,874 | Loss |
| DEL00021028 | chr2 | 134,138,009 | 134,141,321 | 3,312 | Loss |
| DEL00021029 | chr2 | 134,144,753 | 134,144,805 | 52    | Loss |
| DEL00021030 | chr2 | 134,156,682 | 134,156,749 | 67    | Loss |
| DEL00021033 | chr2 | 134,177,815 | 134,177,956 | 141   | Loss |
| DEL00021051 | chr2 | 134,668,430 | 134,668,897 | 467   | Loss |
| DEL00021054 | chr2 | 134,744,462 | 134,745,406 | 944   | Loss |
| DEL00021079 | chr2 | 135,234,632 | 135,234,881 | 249   | Loss |
| DEL00021083 | chr2 | 135,255,518 | 135,255,662 | 144   | Loss |
| DEL00021098 | chr2 | 135,620,839 | 135,620,970 | 131   | Loss |
| DEL00021101 | chr2 | 135,692,010 | 135,692,565 | 555   | Loss |
| DEL00021104 | chr2 | 135,728,844 | 135,728,950 | 106   | Loss |
| DEL00021106 | chr2 | 135,771,364 | 135,771,611 | 247   | Loss |
| DEL00021110 | chr2 | 135,868,548 | 135,868,786 | 238   | Loss |
| DEL00021111 | chr2 | 135,877,754 | 135,877,916 | 162   | Loss |
| DEL00021116 | chr2 | 136,056,611 | 136,063,968 | 7,357 | Loss |
| DEL00021124 | chr2 | 136,196,520 | 136,197,075 | 555   | Loss |
| DEL00021125 | chr2 | 136,202,108 | 136,202,246 | 138   | Loss |
| DEL00021132 | chr2 | 136,287,413 | 136,287,620 | 207   | Loss |
| DEL00021136 | chr2 | 136,388,466 | 136,389,184 | 718   | Loss |
| DEL00021139 | chr2 | 136,391,898 | 136,392,203 | 305   | Loss |
| DEL00021145 | chr2 | 136,409,634 | 136,410,179 | 545   | Loss |
| DEL00021148 | chr2 | 136,509,153 | 136,510,222 | 1,069 | Loss |
| DEL00021149 | chr2 | 136,614,573 | 136,614,918 | 345   | Loss |
| DEL00021154 | chr2 | 136,657,877 | 136,658,185 | 308   | Loss |
| DEL00021155 | chr2 | 136,664,801 | 136,664,874 | 73    | Loss |
| DEL00021167 | chr2 | 136,774,655 | 136,775,765 | 1,110 | Loss |
| DEL00021173 | chr2 | 136,841,118 | 136,841,175 | 57    | Loss |
| DEL00021178 | chr2 | 136,897,109 | 136,897,289 | 180   | Loss |
| DEL00021183 | chr2 | 137,025,658 | 137,025,780 | 122   | Loss |
| DEL00021184 | chr2 | 137,050,347 | 137,050,599 | 252   | Loss |
| DEL00021190 | chr2 | 137,237,915 | 137,238,421 | 506   | Loss |
| DEL00021202 | chr2 | 137,538,627 | 137,538,695 | 68    | Loss |

|             |      |             |             |        |      |
|-------------|------|-------------|-------------|--------|------|
| DEL00021204 | chr2 | 137,540,035 | 137,540,963 | 928    | Loss |
| DEL00021216 | chr2 | 137,652,278 | 137,652,373 | 95     | Loss |
| DEL00021222 | chr2 | 137,749,596 | 137,752,512 | 2,916  | Loss |
| DEL00021224 | chr2 | 137,783,953 | 137,784,710 | 757    | Loss |
| DUP00021226 | chr2 | 137,813,436 | 137,813,503 | 67     | Gain |
| DEL00021238 | chr2 | 138,048,774 | 138,048,834 | 60     | Loss |
| DEL00021245 | chr2 | 138,120,522 | 138,120,708 | 186    | Loss |
| DEL00021251 | chr2 | 138,135,533 | 138,135,983 | 450    | Loss |
| DEL00021254 | chr2 | 138,138,329 | 138,139,188 | 859    | Loss |
| DEL00021256 | chr2 | 138,150,141 | 138,150,279 | 138    | Loss |
| DEL00021260 | chr2 | 138,232,862 | 138,233,003 | 141    | Loss |
| DUP00021267 | chr2 | 138,296,796 | 138,313,031 | 16,235 | Gain |
| DEL00021271 | chr2 | 138,364,945 | 138,365,161 | 216    | Loss |
| DEL00021274 | chr2 | 138,412,064 | 138,412,286 | 222    | Loss |
| DEL00021275 | chr2 | 138,414,520 | 138,416,536 | 2,016  | Loss |
| DEL00021277 | chr2 | 138,440,200 | 138,440,757 | 557    | Loss |
| DEL00021279 | chr2 | 138,457,826 | 138,458,578 | 752    | Loss |
| DEL00021281 | chr2 | 138,491,093 | 138,491,234 | 141    | Loss |
| DEL00021282 | chr2 | 138,508,352 | 138,508,723 | 371    | Loss |
| DEL00021295 | chr2 | 138,612,112 | 138,613,028 | 916    | Loss |
| DEL00021301 | chr2 | 138,758,797 | 138,758,922 | 125    | Loss |
| DEL00021307 | chr2 | 138,799,862 | 138,802,454 | 2,592  | Loss |
| DEL00021308 | chr2 | 138,825,001 | 138,825,693 | 692    | Loss |
| DEL00021311 | chr2 | 138,926,554 | 138,926,617 | 63     | Loss |
| DEL00021314 | chr2 | 138,956,095 | 138,956,262 | 167    | Loss |
| DEL00021316 | chr2 | 138,966,679 | 138,966,844 | 165    | Loss |
| DEL00021335 | chr2 | 139,407,414 | 139,407,599 | 185    | Loss |
| DEL00021336 | chr2 | 139,443,912 | 139,444,328 | 416    | Loss |
| DEL00021339 | chr2 | 139,528,936 | 139,529,243 | 307    | Loss |
| DEL00021346 | chr2 | 139,590,287 | 139,592,122 | 1,835  | Loss |
| DEL00021362 | chr2 | 139,764,759 | 139,764,817 | 58     | Loss |
| DEL00021374 | chr2 | 139,884,285 | 139,886,244 | 1,959  | Loss |
| DEL00021377 | chr2 | 139,915,401 | 139,915,553 | 152    | Loss |
| DEL00021381 | chr2 | 139,943,411 | 139,944,078 | 667    | Loss |
| DEL00021382 | chr2 | 139,945,400 | 139,945,461 | 61     | Loss |
| DEL00021383 | chr2 | 140,001,325 | 140,001,428 | 103    | Loss |
| DEL00021386 | chr2 | 140,073,414 | 140,074,579 | 1,165  | Loss |
| DEL00021388 | chr2 | 140,138,584 | 140,139,200 | 616    | Loss |
| DEL00021398 | chr2 | 140,398,078 | 140,398,584 | 506    | Loss |
| DEL00021401 | chr2 | 140,418,267 | 140,418,451 | 184    | Loss |
| DEL00021402 | chr2 | 140,428,036 | 140,428,267 | 231    | Loss |
| DEL00021407 | chr2 | 140,508,278 | 140,508,780 | 502    | Loss |
| DEL00021411 | chr2 | 140,526,454 | 140,526,511 | 57     | Loss |
| DEL00021412 | chr2 | 140,531,001 | 140,531,080 | 79     | Loss |
| DEL00021417 | chr2 | 140,594,944 | 140,595,009 | 65     | Loss |
| DEL00021422 | chr2 | 140,680,504 | 140,687,816 | 7,312  | Loss |
| DEL00021424 | chr2 | 140,722,047 | 140,722,102 | 55     | Loss |
| DEL00021427 | chr2 | 140,814,046 | 140,814,114 | 68     | Loss |
| DEL00021436 | chr2 | 141,023,050 | 141,023,176 | 126    | Loss |

|             |      |             |             |       |      |
|-------------|------|-------------|-------------|-------|------|
| DEL00021437 | chr2 | 141,034,234 | 141,040,066 | 5,832 | Loss |
| DEL00021438 | chr2 | 141,091,617 | 141,091,691 | 74    | Loss |
| DEL00021445 | chr2 | 141,208,333 | 141,208,441 | 108   | Loss |
| DEL00021457 | chr2 | 141,409,890 | 141,410,365 | 475   | Loss |
| DEL00021458 | chr2 | 141,429,659 | 141,429,710 | 51    | Loss |
| DEL00021466 | chr2 | 141,515,289 | 141,515,391 | 102   | Loss |
| DEL00021468 | chr2 | 141,559,124 | 141,560,383 | 1,259 | Loss |
| DEL00021469 | chr2 | 141,581,706 | 141,581,765 | 59    | Loss |
| DEL00021471 | chr2 | 141,683,326 | 141,684,550 | 1,224 | Loss |
| DUP00021479 | chr2 | 141,810,266 | 141,815,013 | 4,747 | Gain |
| DEL00021480 | chr2 | 141,834,931 | 141,836,329 | 1,398 | Loss |
| DEL00021481 | chr2 | 141,841,981 | 141,842,120 | 139   | Loss |
| DEL00021493 | chr2 | 141,902,847 | 141,903,067 | 220   | Loss |
| DEL00021497 | chr2 | 142,077,187 | 142,077,338 | 151   | Loss |
| DEL00021568 | chr2 | 142,918,107 | 142,918,159 | 52    | Loss |
| DEL00021585 | chr2 | 143,156,129 | 143,156,198 | 69    | Loss |
| DEL00021587 | chr2 | 143,164,492 | 143,165,102 | 610   | Loss |
| DEL00021590 | chr2 | 143,189,882 | 143,196,068 | 6,186 | Loss |
| DEL00021591 | chr2 | 143,204,303 | 143,204,485 | 182   | Loss |
| DEL00021594 | chr2 | 143,318,362 | 143,318,437 | 75    | Loss |
| DEL00021596 | chr2 | 143,355,966 | 143,357,228 | 1,262 | Loss |
| DEL00021599 | chr2 | 143,394,106 | 143,394,455 | 349   | Loss |
| DEL00021604 | chr2 | 143,427,953 | 143,428,013 | 60    | Loss |
| DEL00021605 | chr2 | 143,429,708 | 143,429,766 | 58    | Loss |
| DEL00021609 | chr2 | 143,477,988 | 143,478,052 | 64    | Loss |
| DEL00021611 | chr2 | 143,527,938 | 143,528,858 | 920   | Loss |
| DEL00021612 | chr2 | 143,546,037 | 143,546,472 | 435   | Loss |
| DEL00021615 | chr2 | 143,601,861 | 143,603,062 | 1,201 | Loss |
| DEL00021621 | chr2 | 143,794,651 | 143,796,172 | 1,521 | Loss |
| DUP00021622 | chr2 | 143,823,640 | 143,823,827 | 187   | Gain |
| DEL00021623 | chr2 | 143,827,081 | 143,827,347 | 266   | Loss |
| DEL00021634 | chr2 | 144,025,043 | 144,025,610 | 567   | Loss |
| DEL00021636 | chr2 | 144,060,313 | 144,060,376 | 63    | Loss |
| DEL00021637 | chr2 | 144,070,101 | 144,070,290 | 189   | Loss |
| DEL00021647 | chr2 | 144,385,616 | 144,385,979 | 363   | Loss |
| DEL00021648 | chr2 | 144,387,425 | 144,388,903 | 1,478 | Loss |
| DEL00021652 | chr2 | 144,453,580 | 144,453,709 | 129   | Loss |
| DEL00021655 | chr2 | 144,506,332 | 144,506,448 | 116   | Loss |
| DEL00021657 | chr2 | 144,574,931 | 144,575,098 | 167   | Loss |
| DEL00021658 | chr2 | 144,586,784 | 144,586,859 | 75    | Loss |
| DEL00021662 | chr2 | 144,709,120 | 144,709,188 | 68    | Loss |
| DEL00021673 | chr2 | 144,784,418 | 144,784,543 | 125   | Loss |
| DEL00021674 | chr2 | 144,797,552 | 144,797,611 | 59    | Loss |
| DEL00021688 | chr2 | 144,942,194 | 144,942,334 | 140   | Loss |
| DEL00021692 | chr2 | 144,996,365 | 144,996,421 | 56    | Loss |
| DEL00021693 | chr2 | 145,022,448 | 145,022,548 | 100   | Loss |
| DEL00021696 | chr2 | 145,046,185 | 145,046,755 | 570   | Loss |
| DEL00021705 | chr2 | 145,229,438 | 145,229,619 | 181   | Loss |
| DEL00021707 | chr2 | 145,251,249 | 145,251,304 | 55    | Loss |

|             |      |             |             |        |      |
|-------------|------|-------------|-------------|--------|------|
| DEL00021711 | chr2 | 145,272,807 | 145,273,250 | 443    | Loss |
| DEL00021718 | chr2 | 145,395,604 | 145,395,966 | 362    | Loss |
| DEL00021720 | chr2 | 145,396,475 | 145,396,731 | 256    | Loss |
| DEL00021723 | chr2 | 145,439,628 | 145,440,123 | 495    | Loss |
| DUP00021726 | chr2 | 145,497,949 | 145,498,040 | 91     | Gain |
| DEL00021732 | chr2 | 145,594,027 | 145,594,221 | 194    | Loss |
| DEL00021733 | chr2 | 145,695,975 | 145,696,034 | 59     | Loss |
| DEL00021740 | chr2 | 145,797,699 | 145,797,751 | 52     | Loss |
| DEL00021752 | chr2 | 145,943,034 | 145,943,178 | 144    | Loss |
| DEL00021759 | chr2 | 145,999,272 | 145,999,940 | 668    | Loss |
| DEL00021775 | chr2 | 146,133,053 | 146,133,542 | 489    | Loss |
| DEL00021782 | chr2 | 146,234,248 | 146,234,306 | 58     | Loss |
| DEL00021797 | chr2 | 146,466,195 | 146,466,276 | 81     | Loss |
| DEL00021801 | chr2 | 146,664,281 | 146,664,482 | 201    | Loss |
| DEL00021811 | chr2 | 146,850,270 | 146,850,328 | 58     | Loss |
| DEL00021812 | chr2 | 146,851,144 | 146,851,219 | 75     | Loss |
| DEL00021814 | chr2 | 146,870,774 | 146,871,078 | 304    | Loss |
| DEL00021815 | chr2 | 146,912,598 | 146,912,686 | 88     | Loss |
| DEL00021817 | chr2 | 146,929,798 | 146,930,345 | 547    | Loss |
| DEL00021821 | chr2 | 146,991,872 | 146,992,134 | 262    | Loss |
| DEL00021822 | chr2 | 146,997,463 | 146,997,594 | 131    | Loss |
| DUP00021824 | chr2 | 147,101,944 | 147,102,200 | 256    | Gain |
| DEL00021846 | chr2 | 147,409,047 | 147,409,287 | 240    | Loss |
| DEL00021848 | chr2 | 147,442,094 | 147,442,573 | 479    | Loss |
| DEL00021856 | chr2 | 147,605,063 | 147,605,155 | 92     | Loss |
| DEL00021858 | chr2 | 147,620,046 | 147,620,198 | 152    | Loss |
| DEL00021860 | chr2 | 147,646,283 | 147,646,389 | 106    | Loss |
| DEL00021865 | chr2 | 147,671,002 | 147,671,079 | 77     | Loss |
| DEL00021866 | chr2 | 147,674,491 | 147,675,648 | 1,157  | Loss |
| DEL00021871 | chr2 | 147,768,336 | 147,768,630 | 294    | Loss |
| DEL00021872 | chr2 | 147,800,307 | 147,800,790 | 483    | Loss |
| DEL00021873 | chr2 | 147,851,041 | 147,851,568 | 527    | Loss |
| DEL00021880 | chr2 | 148,068,960 | 148,069,070 | 110    | Loss |
| DEL00021882 | chr2 | 148,130,827 | 148,130,920 | 93     | Loss |
| DEL00021887 | chr2 | 148,182,733 | 148,183,284 | 551    | Loss |
| DEL00021892 | chr2 | 148,260,742 | 148,260,838 | 96     | Loss |
| DEL00021894 | chr2 | 148,270,230 | 148,270,334 | 104    | Loss |
| DUP00021901 | chr2 | 148,337,644 | 148,337,763 | 119    | Gain |
| DUP00022187 | chr2 | 148,433,437 | 148,460,474 | 27,037 | Gain |
| DUP00022294 | chr2 | 148,478,480 | 148,538,342 | 59,862 | Gain |
| DUP00022426 | chr2 | 148,607,865 | 148,608,540 | 675    | Gain |
| DEL00022548 | chr2 | 148,732,182 | 148,732,369 | 187    | Loss |
| DEL00022550 | chr2 | 148,751,159 | 148,751,319 | 160    | Loss |
| DEL00022552 | chr2 | 148,753,823 | 148,760,195 | 6,372  | Loss |
| DEL00022562 | chr2 | 148,772,634 | 148,773,156 | 522    | Loss |
| DEL00022577 | chr2 | 148,794,848 | 148,795,108 | 260    | Loss |
| DEL00022609 | chr2 | 148,840,089 | 148,840,670 | 581    | Loss |
| DEL00022621 | chr2 | 148,851,423 | 148,851,494 | 71     | Loss |
| DEL00022626 | chr2 | 148,859,080 | 148,859,473 | 393    | Loss |

|             |      |             |             |       |       |
|-------------|------|-------------|-------------|-------|-------|
| DUP00022695 | chr2 | 149,058,245 | 149,059,007 | 762   | Gain  |
| DUP00022700 | chr2 | 149,059,089 | 149,059,675 | 586   | Gain  |
| DUP00022730 | chr2 | 149,072,440 | 149,073,388 | 948   | Mixed |
| DEL00022742 | chr2 | 149,074,738 | 149,075,881 | 1,143 | Mixed |
| DEL00022765 | chr2 | 149,080,109 | 149,080,673 | 564   | Loss  |
| DUP00022771 | chr2 | 149,083,242 | 149,083,449 | 207   | Gain  |
| DUP00022781 | chr2 | 149,095,067 | 149,095,573 | 506   | Mixed |
| DUP00022786 | chr2 | 149,096,130 | 149,096,835 | 705   | Gain  |
| DUP00022798 | chr2 | 149,101,073 | 149,101,550 | 477   | Mixed |
| DEL00022813 | chr2 | 149,109,285 | 149,109,418 | 133   | Loss  |
| DEL00022817 | chr2 | 149,117,902 | 149,118,042 | 140   | Loss  |
| DEL00022818 | chr2 | 149,118,629 | 149,118,703 | 74    | Loss  |
| DEL00022826 | chr2 | 149,127,938 | 149,128,025 | 87    | Loss  |
| DEL00022827 | chr2 | 149,128,177 | 149,128,576 | 399   | Loss  |
| DEL00022834 | chr2 | 149,169,654 | 149,169,740 | 86    | Loss  |
| DUP00022836 | chr2 | 149,172,106 | 149,172,993 | 887   | Mixed |
| DUP00022842 | chr2 | 149,179,482 | 149,179,957 | 475   | Mixed |
| DUP00022862 | chr2 | 149,181,162 | 149,182,247 | 1,085 | Gain  |
| DUP00023029 | chr2 | 149,229,075 | 149,229,735 | 660   | Gain  |
| DUP00023087 | chr2 | 149,234,023 | 149,234,233 | 210   | Gain  |
| DEL00023138 | chr2 | 149,250,750 | 149,251,465 | 715   | Loss  |
| DEL00023180 | chr2 | 149,278,061 | 149,278,500 | 439   | Loss  |
| DEL00023197 | chr2 | 149,286,011 | 149,286,085 | 74    | Loss  |
| DEL00023216 | chr2 | 149,290,499 | 149,291,327 | 828   | Loss  |
| DEL00023220 | chr2 | 149,291,351 | 149,291,708 | 357   | Loss  |
| DEL00023241 | chr2 | 149,315,848 | 149,316,462 | 614   | Loss  |
| DEL00023245 | chr2 | 149,320,215 | 149,320,610 | 395   | Loss  |
| DEL00023265 | chr2 | 149,326,943 | 149,327,435 | 492   | Loss  |
| DEL00023307 | chr2 | 149,340,970 | 149,341,839 | 869   | Loss  |
| DUP00023332 | chr2 | 149,346,672 | 149,347,234 | 562   | Gain  |
| DEL00023351 | chr2 | 149,353,696 | 149,354,234 | 538   | Loss  |
| DUP00023386 | chr2 | 149,372,433 | 149,372,879 | 446   | Gain  |
| DUP00023453 | chr2 | 149,394,851 | 149,395,236 | 385   | Mixed |
| DUP00023459 | chr2 | 149,399,050 | 149,399,389 | 339   | Gain  |
| DEL00023462 | chr2 | 149,399,921 | 149,400,081 | 160   | Loss  |
| DEL00023463 | chr2 | 149,403,987 | 149,404,080 | 93    | Loss  |
| DEL00023528 | chr2 | 149,419,434 | 149,420,111 | 677   | Mixed |
| DEL00023539 | chr2 | 149,425,533 | 149,425,694 | 161   | Loss  |
| DUP00023585 | chr2 | 149,444,778 | 149,446,094 | 1,316 | Mixed |
| DEL00023608 | chr2 | 149,451,249 | 149,452,378 | 1,129 | Loss  |
| DUP00023718 | chr2 | 149,487,964 | 149,488,252 | 288   | Gain  |
| DUP00023742 | chr2 | 149,490,812 | 149,491,554 | 742   | Gain  |
| DEL00023804 | chr2 | 149,504,864 | 149,505,518 | 654   | Loss  |
| DEL00023814 | chr2 | 149,505,957 | 149,507,357 | 1,400 | Mixed |
| DUP00023853 | chr2 | 149,512,129 | 149,512,978 | 849   | Gain  |
| DEL00023908 | chr2 | 149,524,414 | 149,525,626 | 1,212 | Loss  |
| DEL00023918 | chr2 | 149,525,948 | 149,526,462 | 514   | Loss  |
| DEL00023952 | chr2 | 149,530,333 | 149,530,520 | 187   | Loss  |
| DUP00023982 | chr2 | 149,536,478 | 149,537,927 | 1,449 | Mixed |

|             |      |           |           |        |      |
|-------------|------|-----------|-----------|--------|------|
| DEL00024006 | chr3 | 70,537    | 70,677    | 140    | Loss |
| DEL00024008 | chr3 | 73,090    | 79,265    | 6,175  | Loss |
| DEL00024010 | chr3 | 82,675    | 82,857    | 182    | Loss |
| DEL00024012 | chr3 | 119,667   | 119,722   | 55     | Loss |
| DEL00024014 | chr3 | 149,554   | 149,654   | 100    | Loss |
| DEL00024016 | chr3 | 171,862   | 174,579   | 2,717  | Loss |
| DEL00024018 | chr3 | 252,163   | 252,245   | 82     | Loss |
| DEL00024020 | chr3 | 277,345   | 277,815   | 470    | Loss |
| DEL00024031 | chr3 | 442,377   | 442,495   | 118    | Loss |
| DEL00024039 | chr3 | 547,793   | 548,112   | 319    | Loss |
| DEL00024041 | chr3 | 572,805   | 575,898   | 3,093  | Loss |
| DEL00024045 | chr3 | 608,805   | 611,305   | 2,500  | Loss |
| DEL00024046 | chr3 | 612,514   | 612,662   | 148    | Loss |
| DEL00024047 | chr3 | 627,746   | 629,022   | 1,276  | Loss |
| DEL00024050 | chr3 | 641,916   | 642,315   | 399    | Loss |
| DUP00024069 | chr3 | 1,014,959 | 1,015,019 | 60     | Gain |
| DEL00024077 | chr3 | 1,376,989 | 1,377,352 | 363    | Loss |
| DEL00024081 | chr3 | 1,533,397 | 1,533,824 | 427    | Loss |
| DEL00024094 | chr3 | 1,981,516 | 1,982,221 | 705    | Loss |
| DEL00024102 | chr3 | 2,374,411 | 2,374,474 | 63     | Loss |
| DEL00024108 | chr3 | 2,966,688 | 2,967,190 | 502    | Loss |
| DEL00024113 | chr3 | 3,095,708 | 3,095,867 | 159    | Loss |
| DEL00024114 | chr3 | 3,115,330 | 3,115,413 | 83     | Loss |
| DEL00024120 | chr3 | 3,206,847 | 3,207,535 | 688    | Loss |
| DUP00024123 | chr3 | 3,224,656 | 3,242,549 | 17,893 | Gain |
| DEL00024140 | chr3 | 3,389,225 | 3,389,409 | 184    | Loss |
| DEL00024141 | chr3 | 3,407,274 | 3,407,409 | 135    | Loss |
| DEL00024150 | chr3 | 3,523,295 | 3,523,575 | 280    | Loss |
| DEL00024170 | chr3 | 3,754,919 | 3,755,075 | 156    | Loss |
| DEL00024185 | chr3 | 4,042,806 | 4,042,979 | 173    | Loss |
| DEL00024186 | chr3 | 4,043,710 | 4,043,764 | 54     | Loss |
| DEL00024192 | chr3 | 4,105,398 | 4,105,971 | 573    | Loss |
| DEL00024202 | chr3 | 4,194,657 | 4,194,803 | 146    | Loss |
| DEL00024215 | chr3 | 4,335,240 | 4,336,262 | 1,022  | Loss |
| DEL00024219 | chr3 | 4,378,852 | 4,379,042 | 190    | Loss |
| DEL00024222 | chr3 | 4,413,719 | 4,413,770 | 51     | Loss |
| DEL00024227 | chr3 | 4,530,436 | 4,530,582 | 146    | Loss |
| DEL00024243 | chr3 | 4,740,019 | 4,740,454 | 435    | Loss |
| DEL00024245 | chr3 | 4,748,994 | 4,749,299 | 305    | Loss |
| DEL00024249 | chr3 | 4,768,842 | 4,769,377 | 535    | Loss |
| DEL00024258 | chr3 | 4,878,522 | 4,879,136 | 614    | Loss |
| DEL00024265 | chr3 | 4,945,501 | 4,945,808 | 307    | Loss |
| DEL00024272 | chr3 | 5,044,115 | 5,044,285 | 170    | Loss |
| DEL00024275 | chr3 | 5,150,074 | 5,150,187 | 113    | Loss |
| DEL00024280 | chr3 | 5,220,963 | 5,221,447 | 484    | Loss |
| DEL00024281 | chr3 | 5,228,243 | 5,229,301 | 1,058  | Loss |
| DEL00024292 | chr3 | 5,574,728 | 5,574,782 | 54     | Loss |
| DEL00024304 | chr3 | 5,768,353 | 5,768,443 | 90     | Loss |
| DEL00024305 | chr3 | 5,788,116 | 5,788,971 | 855    | Loss |

|             |      |           |           |       |      |
|-------------|------|-----------|-----------|-------|------|
| DEL00024307 | chr3 | 5,826,731 | 5,827,300 | 569   | Loss |
| DEL00024322 | chr3 | 6,141,031 | 6,141,109 | 78    | Loss |
| DEL00024333 | chr3 | 6,246,512 | 6,247,271 | 759   | Loss |
| DEL00024334 | chr3 | 6,273,346 | 6,273,408 | 62    | Loss |
| DEL00024335 | chr3 | 6,303,197 | 6,304,153 | 956   | Loss |
| DEL00024336 | chr3 | 6,317,660 | 6,317,951 | 291   | Loss |
| DEL00024338 | chr3 | 6,372,508 | 6,372,893 | 385   | Loss |
| DEL00024342 | chr3 | 6,455,505 | 6,457,360 | 1,855 | Loss |
| DEL00024348 | chr3 | 6,558,626 | 6,559,636 | 1,010 | Loss |
| DEL00024351 | chr3 | 6,612,078 | 6,612,182 | 104   | Loss |
| DEL00024352 | chr3 | 6,628,153 | 6,628,369 | 216   | Loss |
| DEL00024360 | chr3 | 6,775,974 | 6,776,036 | 62    | Loss |
| DEL00024367 | chr3 | 6,887,456 | 6,887,651 | 195   | Loss |
| DEL00024372 | chr3 | 6,940,896 | 6,941,292 | 396   | Loss |
| DEL00024378 | chr3 | 7,029,736 | 7,029,829 | 93    | Loss |
| DEL00024385 | chr3 | 7,096,163 | 7,096,227 | 64    | Loss |
| DEL00024392 | chr3 | 7,152,817 | 7,152,905 | 88    | Loss |
| DEL00024399 | chr3 | 7,315,291 | 7,321,736 | 6,445 | Loss |
| DEL00024414 | chr3 | 7,688,426 | 7,688,629 | 203   | Loss |
| DEL00024416 | chr3 | 7,699,751 | 7,700,121 | 370   | Loss |
| DEL00024417 | chr3 | 7,777,097 | 7,777,152 | 55    | Loss |
| DEL00024418 | chr3 | 7,783,070 | 7,783,272 | 202   | Loss |
| DEL00024420 | chr3 | 7,810,444 | 7,810,650 | 206   | Loss |
| DEL00024422 | chr3 | 7,875,984 | 7,876,773 | 789   | Loss |
| DEL00024424 | chr3 | 7,921,008 | 7,921,635 | 627   | Loss |
| DEL00024425 | chr3 | 7,932,156 | 7,932,249 | 93    | Loss |
| DEL00024427 | chr3 | 7,951,767 | 7,952,057 | 290   | Loss |
| DEL00024428 | chr3 | 7,971,858 | 7,971,918 | 60    | Loss |
| DEL00024437 | chr3 | 8,129,502 | 8,130,662 | 1,160 | Loss |
| DEL00024438 | chr3 | 8,149,667 | 8,149,784 | 117   | Loss |
| DEL00024448 | chr3 | 8,324,947 | 8,325,002 | 55    | Loss |
| DEL00024450 | chr3 | 8,379,768 | 8,379,923 | 155   | Loss |
| DEL00024452 | chr3 | 8,452,121 | 8,452,300 | 179   | Loss |
| DEL00024457 | chr3 | 8,481,477 | 8,481,943 | 466   | Loss |
| DEL00024464 | chr3 | 8,567,284 | 8,567,382 | 98    | Loss |
| DEL00024468 | chr3 | 8,628,348 | 8,629,030 | 682   | Loss |
| DEL00024472 | chr3 | 8,662,266 | 8,662,512 | 246   | Loss |
| DEL00024477 | chr3 | 8,727,398 | 8,727,580 | 182   | Loss |
| DEL00024478 | chr3 | 8,730,163 | 8,730,363 | 200   | Loss |
| DEL00024479 | chr3 | 8,753,218 | 8,753,370 | 152   | Loss |
| DEL00024483 | chr3 | 8,845,550 | 8,845,973 | 423   | Loss |
| DEL00024494 | chr3 | 9,041,540 | 9,041,658 | 118   | Loss |
| DEL00024496 | chr3 | 9,054,085 | 9,054,156 | 71    | Loss |
| DUP00024497 | chr3 | 9,117,214 | 9,117,281 | 67    | Gain |
| DEL00024499 | chr3 | 9,155,307 | 9,155,523 | 216   | Loss |
| DEL00024505 | chr3 | 9,307,417 | 9,307,922 | 505   | Loss |
| DEL00024507 | chr3 | 9,389,259 | 9,389,450 | 191   | Loss |
| DEL00024508 | chr3 | 9,389,728 | 9,389,877 | 149   | Loss |
| DEL00024514 | chr3 | 9,506,414 | 9,506,717 | 303   | Loss |



|             |      |            |            |       |      |
|-------------|------|------------|------------|-------|------|
| DEL00024518 | chr3 | 9,558,909  | 9,558,988  | 79    | Loss |
| DEL00024519 | chr3 | 9,576,680  | 9,576,751  | 71    | Loss |
| DEL00024531 | chr3 | 9,877,302  | 9,877,728  | 426   | Loss |
| DEL00024534 | chr3 | 9,952,728  | 9,952,845  | 117   | Loss |
| DEL00024539 | chr3 | 10,085,632 | 10,085,684 | 52    | Loss |
| DEL00024540 | chr3 | 10,101,882 | 10,102,390 | 508   | Loss |
| DEL00024543 | chr3 | 10,128,497 | 10,128,668 | 171   | Loss |
| DEL00024546 | chr3 | 10,175,019 | 10,175,144 | 125   | Loss |
| DEL00024549 | chr3 | 10,206,550 | 10,206,601 | 51    | Loss |
| DEL00024560 | chr3 | 10,484,072 | 10,484,188 | 116   | Loss |
| DEL00024568 | chr3 | 10,530,923 | 10,531,217 | 294   | Loss |
| DEL00024571 | chr3 | 10,593,908 | 10,594,390 | 482   | Loss |
| DEL00024576 | chr3 | 10,703,219 | 10,703,312 | 93    | Loss |
| DEL00024587 | chr3 | 11,224,278 | 11,224,613 | 335   | Loss |
| DUP00024588 | chr3 | 11,229,250 | 11,232,027 | 2,777 | Gain |
| DEL00024590 | chr3 | 11,374,958 | 11,375,027 | 69    | Loss |
| DEL00024591 | chr3 | 11,460,658 | 11,460,716 | 58    | Loss |
| DEL00024593 | chr3 | 11,491,950 | 11,492,017 | 67    | Loss |
| DEL00024594 | chr3 | 11,588,164 | 11,588,378 | 214   | Loss |
| DEL00024596 | chr3 | 11,657,176 | 11,657,671 | 495   | Loss |
| DEL00024608 | chr3 | 11,952,153 | 11,952,729 | 576   | Loss |
| DEL00024609 | chr3 | 11,954,539 | 11,954,623 | 84    | Loss |
| DEL00024610 | chr3 | 11,960,840 | 11,961,930 | 1,090 | Loss |
| DEL00024642 | chr3 | 12,218,002 | 12,218,059 | 57    | Loss |
| DEL00024649 | chr3 | 12,257,141 | 12,257,549 | 408   | Loss |
| DEL00024655 | chr3 | 12,529,228 | 12,529,761 | 533   | Loss |
| DUP00024661 | chr3 | 12,595,086 | 12,595,148 | 62    | Gain |
| DEL00024670 | chr3 | 12,755,661 | 12,755,871 | 210   | Loss |
| DEL00024674 | chr3 | 12,821,756 | 12,822,868 | 1,112 | Loss |
| DEL00024682 | chr3 | 12,998,043 | 12,998,303 | 260   | Loss |
| DEL00024684 | chr3 | 13,070,654 | 13,071,028 | 374   | Loss |
| DEL00024689 | chr3 | 13,114,164 | 13,114,236 | 72    | Loss |
| DEL00024694 | chr3 | 13,325,579 | 13,325,636 | 57    | Loss |
| DEL00024697 | chr3 | 13,495,990 | 13,496,171 | 181   | Loss |
| DEL00024698 | chr3 | 13,544,686 | 13,545,756 | 1,070 | Loss |
| DEL00024699 | chr3 | 13,552,090 | 13,552,950 | 860   | Loss |
| DEL00024700 | chr3 | 13,575,386 | 13,575,524 | 138   | Loss |
| DEL00024701 | chr3 | 13,595,510 | 13,595,585 | 75    | Loss |
| DEL00024703 | chr3 | 13,598,143 | 13,598,280 | 137   | Loss |
| DEL00024712 | chr3 | 13,943,064 | 13,943,293 | 229   | Loss |
| DEL00024715 | chr3 | 13,963,985 | 13,964,288 | 303   | Loss |
| DEL00024717 | chr3 | 13,992,718 | 13,993,234 | 516   | Loss |
| DUP00024718 | chr3 | 14,044,845 | 14,044,913 | 68    | Gain |
| DEL00024722 | chr3 | 14,118,032 | 14,118,154 | 122   | Loss |
| DEL00024736 | chr3 | 14,304,033 | 14,304,117 | 84    | Loss |
| DEL00024738 | chr3 | 14,329,059 | 14,331,275 | 2,216 | Loss |
| DEL00024749 | chr3 | 14,762,666 | 14,762,744 | 78    | Loss |
| DEL00024753 | chr3 | 14,786,264 | 14,787,465 | 1,201 | Loss |
| DEL00024760 | chr3 | 15,025,038 | 15,025,229 | 191   | Loss |

|             |      |            |            |       |      |
|-------------|------|------------|------------|-------|------|
| DEL00024763 | chr3 | 15,083,271 | 15,083,522 | 251   | Loss |
| DEL00024765 | chr3 | 15,172,300 | 15,172,733 | 433   | Loss |
| DEL00024767 | chr3 | 15,244,627 | 15,244,830 | 203   | Loss |
| DEL00024772 | chr3 | 15,325,221 | 15,326,211 | 990   | Loss |
| DEL00024787 | chr3 | 15,689,238 | 15,689,695 | 457   | Loss |
| DEL00024790 | chr3 | 15,753,417 | 15,753,535 | 118   | Loss |
| DEL00024800 | chr3 | 15,901,241 | 15,901,383 | 142   | Loss |
| DEL00024806 | chr3 | 16,074,728 | 16,075,650 | 922   | Loss |
| DEL00024809 | chr3 | 16,087,220 | 16,088,104 | 884   | Loss |
| DEL00024811 | chr3 | 16,105,434 | 16,105,614 | 180   | Loss |
| DEL00024816 | chr3 | 16,207,484 | 16,207,674 | 190   | Loss |
| DEL00024818 | chr3 | 16,227,229 | 16,227,416 | 187   | Loss |
| DEL00024819 | chr3 | 16,243,644 | 16,243,821 | 177   | Loss |
| DEL00024823 | chr3 | 16,311,114 | 16,311,175 | 61    | Loss |
| DEL00024830 | chr3 | 16,498,920 | 16,498,997 | 77    | Loss |
| DEL00024838 | chr3 | 16,698,999 | 16,699,260 | 261   | Loss |
| DEL00024842 | chr3 | 16,781,726 | 16,781,880 | 154   | Loss |
| DEL00024848 | chr3 | 16,910,321 | 16,910,857 | 536   | Loss |
| DEL00024858 | chr3 | 17,152,962 | 17,153,018 | 56    | Loss |
| DEL00024875 | chr3 | 17,351,093 | 17,351,199 | 106   | Loss |
| DEL00024885 | chr3 | 17,612,481 | 17,612,541 | 60    | Loss |
| DEL00024886 | chr3 | 17,660,507 | 17,660,660 | 153   | Loss |
| DEL00024889 | chr3 | 17,785,809 | 17,786,263 | 454   | Loss |
| DEL00024895 | chr3 | 18,064,009 | 18,064,341 | 332   | Loss |
| DEL00024897 | chr3 | 18,131,170 | 18,131,222 | 52    | Loss |
| DEL00024900 | chr3 | 18,198,154 | 18,198,745 | 591   | Loss |
| DEL00024906 | chr3 | 18,412,868 | 18,412,985 | 117   | Loss |
| DEL00024911 | chr3 | 18,539,834 | 18,539,930 | 96    | Loss |
| DEL00024914 | chr3 | 18,600,161 | 18,600,406 | 245   | Loss |
| DEL00024919 | chr3 | 18,608,637 | 18,608,895 | 258   | Loss |
| DEL00024921 | chr3 | 18,636,732 | 18,636,842 | 110   | Loss |
| DEL00024923 | chr3 | 18,705,901 | 18,706,326 | 425   | Loss |
| DEL00024924 | chr3 | 18,731,913 | 18,732,353 | 440   | Loss |
| DEL00024930 | chr3 | 18,852,532 | 18,852,598 | 66    | Loss |
| DEL00024931 | chr3 | 18,857,052 | 18,857,145 | 93    | Loss |
| DEL00024935 | chr3 | 18,980,547 | 18,980,606 | 59    | Loss |
| DEL00024939 | chr3 | 19,003,704 | 19,003,789 | 85    | Loss |
| DEL00024941 | chr3 | 19,012,629 | 19,012,748 | 119   | Loss |
| DEL00024946 | chr3 | 19,072,039 | 19,072,372 | 333   | Loss |
| DEL00024949 | chr3 | 19,094,258 | 19,095,094 | 836   | Loss |
| DEL00024959 | chr3 | 19,203,756 | 19,204,013 | 257   | Loss |
| DEL00024960 | chr3 | 19,237,763 | 19,237,849 | 86    | Loss |
| DEL00024961 | chr3 | 19,255,442 | 19,255,741 | 299   | Loss |
| DEL00024962 | chr3 | 19,260,250 | 19,260,476 | 226   | Loss |
| DEL00024964 | chr3 | 19,287,397 | 19,290,688 | 3,291 | Loss |
| DUP00024967 | chr3 | 19,297,915 | 19,298,049 | 134   | Gain |
| DEL00024968 | chr3 | 19,315,042 | 19,315,097 | 55    | Loss |
| DEL00024969 | chr3 | 19,338,115 | 19,338,184 | 69    | Loss |
| DEL00024972 | chr3 | 19,371,919 | 19,371,983 | 64    | Loss |

|             |      |            |            |       |      |
|-------------|------|------------|------------|-------|------|
| DEL00024980 | chr3 | 19,548,964 | 19,549,015 | 51    | Loss |
| DEL00024985 | chr3 | 19,643,451 | 19,644,197 | 746   | Loss |
| DEL00024986 | chr3 | 19,654,890 | 19,654,951 | 61    | Loss |
| DEL00024988 | chr3 | 19,713,183 | 19,713,259 | 76    | Loss |
| DEL00024992 | chr3 | 19,803,244 | 19,803,306 | 62    | Loss |
| DEL00024995 | chr3 | 19,956,532 | 19,956,623 | 91    | Loss |
| DEL00025001 | chr3 | 20,188,299 | 20,188,442 | 143   | Loss |
| DEL00025002 | chr3 | 20,237,950 | 20,238,039 | 89    | Loss |
| DEL00025010 | chr3 | 20,445,841 | 20,445,896 | 55    | Loss |
| DEL00025011 | chr3 | 20,476,392 | 20,477,575 | 1,183 | Loss |
| DEL00025012 | chr3 | 20,493,214 | 20,493,715 | 501   | Loss |
| DEL00025013 | chr3 | 20,511,794 | 20,511,915 | 121   | Loss |
| DEL00025014 | chr3 | 20,525,874 | 20,525,959 | 85    | Loss |
| DEL00025015 | chr3 | 20,541,411 | 20,541,660 | 249   | Loss |
| DEL00025021 | chr3 | 20,694,135 | 20,694,472 | 337   | Loss |
| DEL00025027 | chr3 | 20,828,067 | 20,828,123 | 56    | Loss |
| DEL00025036 | chr3 | 20,972,171 | 20,972,242 | 71    | Loss |
| DEL00025037 | chr3 | 20,978,502 | 20,979,254 | 752   | Loss |
| DEL00025048 | chr3 | 21,456,597 | 21,457,273 | 676   | Loss |
| DEL00025049 | chr3 | 21,526,288 | 21,526,427 | 139   | Loss |
| DEL00025059 | chr3 | 21,956,221 | 21,956,987 | 766   | Loss |
| DEL00025064 | chr3 | 22,039,253 | 22,039,835 | 582   | Loss |
| DEL00025069 | chr3 | 22,118,437 | 22,119,056 | 619   | Loss |
| DEL00025070 | chr3 | 22,120,417 | 22,120,543 | 126   | Loss |
| DEL00025074 | chr3 | 22,202,866 | 22,206,262 | 3,396 | Loss |
| DEL00025080 | chr3 | 22,388,928 | 22,389,029 | 101   | Loss |
| DEL00025083 | chr3 | 22,473,236 | 22,473,312 | 76    | Loss |
| DEL00025093 | chr3 | 22,614,153 | 22,614,256 | 103   | Loss |
| DEL00025098 | chr3 | 22,717,592 | 22,717,744 | 152   | Loss |
| DEL00025099 | chr3 | 22,723,668 | 22,723,751 | 83    | Loss |
| DEL00025103 | chr3 | 22,819,617 | 22,820,052 | 435   | Loss |
| DEL00025105 | chr3 | 22,960,948 | 22,961,048 | 100   | Loss |
| DEL00025116 | chr3 | 23,040,282 | 23,040,500 | 218   | Loss |
| DEL00025120 | chr3 | 23,122,303 | 23,122,995 | 692   | Loss |
| DEL00025126 | chr3 | 23,258,454 | 23,258,527 | 73    | Loss |
| DEL00025129 | chr3 | 23,373,626 | 23,373,888 | 262   | Loss |
| DEL00025135 | chr3 | 23,481,847 | 23,482,427 | 580   | Loss |
| DEL00025136 | chr3 | 23,489,847 | 23,490,043 | 196   | Loss |
| DEL00025141 | chr3 | 23,575,615 | 23,576,132 | 517   | Loss |
| DEL00025142 | chr3 | 23,581,681 | 23,582,256 | 575   | Loss |
| DEL00025143 | chr3 | 23,582,344 | 23,582,476 | 132   | Loss |
| DEL00025147 | chr3 | 23,619,216 | 23,619,267 | 51    | Loss |
| DEL00025153 | chr3 | 23,678,923 | 23,678,974 | 51    | Loss |
| DEL00025154 | chr3 | 23,682,931 | 23,683,373 | 442   | Loss |
| DEL00025156 | chr3 | 23,739,561 | 23,739,875 | 314   | Loss |
| DEL00025164 | chr3 | 24,058,926 | 24,059,521 | 595   | Loss |
| DEL00025167 | chr3 | 24,148,210 | 24,148,335 | 125   | Loss |
| DEL00025168 | chr3 | 24,186,986 | 24,187,946 | 960   | Loss |
| DEL00025171 | chr3 | 24,242,253 | 24,242,698 | 445   | Loss |

|             |      |            |            |        |      |
|-------------|------|------------|------------|--------|------|
| DEL00025175 | chr3 | 24,264,779 | 24,265,246 | 467    | Loss |
| DEL00025182 | chr3 | 24,557,948 | 24,558,007 | 59     | Loss |
| DEL00025185 | chr3 | 24,632,378 | 24,632,555 | 177    | Loss |
| DEL00025187 | chr3 | 24,648,099 | 24,648,327 | 228    | Loss |
| DEL00025190 | chr3 | 24,769,607 | 24,769,661 | 54     | Loss |
| DEL00025194 | chr3 | 24,941,531 | 24,941,595 | 64     | Loss |
| DEL00025199 | chr3 | 24,991,485 | 24,991,884 | 399    | Loss |
| DEL00025201 | chr3 | 25,009,917 | 25,009,991 | 74     | Loss |
| DEL00025206 | chr3 | 25,061,186 | 25,061,534 | 348    | Loss |
| DEL00025213 | chr3 | 25,168,800 | 25,169,261 | 461    | Loss |
| DEL00025214 | chr3 | 25,180,827 | 25,180,890 | 63     | Loss |
| DEL00025220 | chr3 | 25,341,428 | 25,341,639 | 211    | Loss |
| DEL00025221 | chr3 | 25,364,304 | 25,364,612 | 308    | Loss |
| DEL00025222 | chr3 | 25,395,511 | 25,395,570 | 59     | Loss |
| DEL00025223 | chr3 | 25,421,948 | 25,422,073 | 125    | Loss |
| DEL00025227 | chr3 | 25,462,539 | 25,462,646 | 107    | Loss |
| DEL00025230 | chr3 | 25,499,141 | 25,499,211 | 70     | Loss |
| DEL00025255 | chr3 | 25,927,417 | 25,927,468 | 51     | Loss |
| DUP00025256 | chr3 | 25,978,025 | 25,996,245 | 18,220 | Gain |
| DEL00025262 | chr3 | 26,096,638 | 26,096,806 | 168    | Loss |
| DEL00025265 | chr3 | 26,110,926 | 26,111,411 | 485    | Loss |
| DEL00025269 | chr3 | 26,169,730 | 26,170,512 | 782    | Loss |
| DUP00025277 | chr3 | 26,309,292 | 26,309,352 | 60     | Gain |
| DEL00025282 | chr3 | 26,369,346 | 26,369,850 | 504    | Loss |
| DEL00025285 | chr3 | 26,476,588 | 26,477,003 | 415    | Loss |
| DEL00025286 | chr3 | 26,487,429 | 26,487,498 | 69     | Loss |
| DEL00025287 | chr3 | 26,540,406 | 26,540,577 | 171    | Loss |
| DEL00025293 | chr3 | 26,733,071 | 26,733,337 | 266    | Loss |
| DEL00025294 | chr3 | 26,765,410 | 26,766,257 | 847    | Loss |
| DEL00025300 | chr3 | 26,956,460 | 26,958,349 | 1,889  | Loss |
| DEL00025306 | chr3 | 27,007,671 | 27,008,230 | 559    | Loss |
| DEL00025308 | chr3 | 27,081,539 | 27,081,900 | 361    | Loss |
| DEL00025309 | chr3 | 27,088,998 | 27,089,218 | 220    | Loss |
| DEL00025312 | chr3 | 27,210,220 | 27,210,445 | 225    | Loss |
| DEL00025319 | chr3 | 27,291,752 | 27,292,100 | 348    | Loss |
| DEL00025326 | chr3 | 27,436,809 | 27,436,919 | 110    | Loss |
| DEL00025329 | chr3 | 27,464,906 | 27,465,081 | 175    | Loss |
| DEL00025335 | chr3 | 27,539,855 | 27,539,917 | 62     | Loss |
| DEL00025337 | chr3 | 27,605,743 | 27,605,935 | 192    | Loss |
| DEL00025349 | chr3 | 27,903,834 | 27,904,103 | 269    | Loss |
| DEL00025354 | chr3 | 27,983,385 | 27,983,462 | 77     | Loss |
| DEL00025362 | chr3 | 28,076,504 | 28,076,702 | 198    | Loss |
| DEL00025370 | chr3 | 28,243,335 | 28,244,395 | 1,060  | Loss |
| DEL00025373 | chr3 | 28,253,931 | 28,257,162 | 3,231  | Loss |
| DEL00025379 | chr3 | 28,353,882 | 28,354,156 | 274    | Loss |
| DEL00025380 | chr3 | 28,410,172 | 28,410,403 | 231    | Loss |
| DEL00025381 | chr3 | 28,410,503 | 28,411,993 | 1,490  | Loss |
| DEL00025384 | chr3 | 28,447,738 | 28,447,919 | 181    | Loss |
| DEL00025387 | chr3 | 28,520,104 | 28,520,856 | 752    | Loss |

|             |      |            |            |       |      |
|-------------|------|------------|------------|-------|------|
| DEL00025389 | chr3 | 28,612,970 | 28,614,135 | 1,165 | Loss |
| DEL00025393 | chr3 | 28,667,176 | 28,667,491 | 315   | Loss |
| DEL00025401 | chr3 | 28,960,719 | 28,961,383 | 664   | Loss |
| DEL00025404 | chr3 | 29,131,461 | 29,134,265 | 2,804 | Loss |
| DEL00025408 | chr3 | 29,270,146 | 29,270,445 | 299   | Loss |
| DEL00025410 | chr3 | 29,290,922 | 29,290,989 | 67    | Loss |
| DEL00025424 | chr3 | 29,409,492 | 29,409,604 | 112   | Loss |
| DEL00025427 | chr3 | 29,433,932 | 29,434,611 | 679   | Loss |
| DEL00025431 | chr3 | 29,454,555 | 29,454,719 | 164   | Loss |
| DEL00025433 | chr3 | 29,527,089 | 29,527,433 | 344   | Loss |
| DEL00025436 | chr3 | 29,733,219 | 29,733,471 | 252   | Loss |
| DEL00025438 | chr3 | 29,738,477 | 29,738,643 | 166   | Loss |
| DEL00025447 | chr3 | 29,890,147 | 29,890,970 | 823   | Loss |
| DEL00025448 | chr3 | 29,946,211 | 29,946,264 | 53    | Loss |
| DEL00025467 | chr3 | 30,536,363 | 30,536,483 | 120   | Loss |
| DUP00025475 | chr3 | 30,981,143 | 30,981,214 | 71    | Gain |
| DEL00025478 | chr3 | 31,029,316 | 31,029,470 | 154   | Loss |
| DUP00025480 | chr3 | 31,039,656 | 31,039,837 | 181   | Gain |
| DEL00025482 | chr3 | 31,045,658 | 31,046,013 | 355   | Loss |
| DEL00025486 | chr3 | 31,073,670 | 31,073,738 | 68    | Loss |
| DEL00025488 | chr3 | 31,153,890 | 31,157,713 | 3,823 | Loss |
| DEL00025497 | chr3 | 31,346,415 | 31,346,893 | 478   | Loss |
| DEL00025498 | chr3 | 31,357,764 | 31,357,875 | 111   | Loss |
| DEL00025502 | chr3 | 31,403,720 | 31,404,516 | 796   | Loss |
| DEL00025507 | chr3 | 31,428,646 | 31,428,721 | 75    | Loss |
| DEL00025512 | chr3 | 31,471,335 | 31,471,625 | 290   | Loss |
| DEL00025515 | chr3 | 31,554,580 | 31,554,637 | 57    | Loss |
| DEL00025516 | chr3 | 31,561,475 | 31,561,539 | 64    | Loss |
| DEL00025519 | chr3 | 31,579,740 | 31,579,794 | 54    | Loss |
| DEL00025526 | chr3 | 31,670,588 | 31,670,787 | 199   | Loss |
| DEL00025527 | chr3 | 31,687,335 | 31,687,386 | 51    | Loss |
| DEL00025528 | chr3 | 31,692,058 | 31,692,147 | 89    | Loss |
| DEL00025529 | chr3 | 31,714,147 | 31,714,660 | 513   | Loss |
| DEL00025535 | chr3 | 31,867,378 | 31,867,697 | 319   | Loss |
| DEL00025540 | chr3 | 31,936,828 | 31,937,178 | 350   | Loss |
| DEL00025545 | chr3 | 32,027,444 | 32,027,703 | 259   | Loss |
| DEL00025549 | chr3 | 32,071,602 | 32,071,786 | 184   | Loss |
| DEL00025550 | chr3 | 32,089,337 | 32,089,451 | 114   | Loss |
| DEL00025551 | chr3 | 32,168,255 | 32,168,387 | 132   | Loss |
| DEL00025555 | chr3 | 32,244,990 | 32,246,681 | 1,691 | Loss |
| DEL00025564 | chr3 | 32,415,493 | 32,418,117 | 2,624 | Loss |
| DEL00025570 | chr3 | 32,591,448 | 32,591,592 | 144   | Loss |
| DEL00025571 | chr3 | 32,596,032 | 32,596,292 | 260   | Loss |
| DEL00025573 | chr3 | 32,609,154 | 32,609,225 | 71    | Loss |
| DEL00025575 | chr3 | 32,633,306 | 32,633,357 | 51    | Loss |
| DEL00025577 | chr3 | 32,655,251 | 32,655,316 | 65    | Loss |
| DEL00025578 | chr3 | 32,704,955 | 32,705,123 | 168   | Loss |
| DEL00025580 | chr3 | 32,717,452 | 32,717,672 | 220   | Loss |
| DEL00025581 | chr3 | 32,721,496 | 32,722,434 | 938   | Loss |

|             |      |            |            |        |      |
|-------------|------|------------|------------|--------|------|
| DUP00025587 | chr3 | 32,807,753 | 32,820,669 | 12,916 | Gain |
| DEL00025592 | chr3 | 32,871,854 | 32,872,526 | 672    | Loss |
| DEL00025596 | chr3 | 32,987,134 | 32,987,188 | 54     | Loss |
| DEL00025600 | chr3 | 33,023,474 | 33,023,532 | 58     | Loss |
| DEL00025602 | chr3 | 33,049,418 | 33,049,810 | 392    | Loss |
| DEL00025603 | chr3 | 33,056,488 | 33,056,553 | 65     | Loss |
| DEL00025605 | chr3 | 33,110,119 | 33,111,247 | 1,128  | Loss |
| DEL00025617 | chr3 | 33,303,449 | 33,303,528 | 79     | Loss |
| DEL00025619 | chr3 | 33,339,172 | 33,339,452 | 280    | Loss |
| DEL00025622 | chr3 | 33,372,632 | 33,372,697 | 65     | Loss |
| DEL00025650 | chr3 | 33,752,248 | 33,753,047 | 799    | Loss |
| DEL00025651 | chr3 | 33,758,442 | 33,758,551 | 109    | Loss |
| DEL00025653 | chr3 | 33,793,095 | 33,793,164 | 69     | Loss |
| DEL00025659 | chr3 | 33,901,100 | 33,901,243 | 143    | Loss |
| DEL00025668 | chr3 | 34,073,882 | 34,074,012 | 130    | Loss |
| DEL00025674 | chr3 | 34,137,110 | 34,137,482 | 372    | Loss |
| DEL00025675 | chr3 | 34,159,105 | 34,159,181 | 76     | Loss |
| DUP00025677 | chr3 | 34,178,978 | 34,179,105 | 127    | Gain |
| DUP00025683 | chr3 | 34,293,591 | 34,293,752 | 161    | Gain |
| DEL00025685 | chr3 | 34,351,604 | 34,351,878 | 274    | Loss |
| DEL00025690 | chr3 | 34,423,361 | 34,424,377 | 1,016  | Loss |
| DEL00025694 | chr3 | 34,534,965 | 34,535,049 | 84     | Loss |
| DEL00025695 | chr3 | 34,535,673 | 34,539,066 | 3,393  | Loss |
| DEL00025700 | chr3 | 34,591,831 | 34,591,997 | 166    | Loss |
| DEL00025701 | chr3 | 34,633,613 | 34,633,725 | 112    | Loss |
| DEL00025702 | chr3 | 34,659,147 | 34,659,229 | 82     | Loss |
| DEL00025703 | chr3 | 34,665,164 | 34,665,788 | 624    | Loss |
| DEL00025704 | chr3 | 34,687,005 | 34,687,069 | 64     | Loss |
| DEL00025707 | chr3 | 34,764,865 | 34,764,962 | 97     | Loss |
| DEL00025709 | chr3 | 34,801,163 | 34,801,255 | 92     | Loss |
| DEL00025721 | chr3 | 35,120,040 | 35,120,276 | 236    | Loss |
| DEL00025723 | chr3 | 35,148,362 | 35,148,621 | 259    | Loss |
| DUP00025725 | chr3 | 35,247,727 | 35,247,872 | 145    | Gain |
| DEL00025727 | chr3 | 35,290,950 | 35,291,278 | 328    | Loss |
| DEL00025735 | chr3 | 35,413,067 | 35,413,360 | 293    | Loss |
| DEL00025739 | chr3 | 35,509,782 | 35,509,960 | 178    | Loss |
| DEL00025741 | chr3 | 35,530,305 | 35,530,575 | 270    | Loss |
| DEL00025747 | chr3 | 35,639,836 | 35,640,061 | 225    | Loss |
| DEL00025750 | chr3 | 35,658,896 | 35,658,979 | 83     | Loss |
| DEL00025751 | chr3 | 35,659,678 | 35,659,778 | 100    | Loss |
| DEL00025757 | chr3 | 35,781,205 | 35,781,380 | 175    | Loss |
| DEL00025762 | chr3 | 35,852,792 | 35,852,909 | 117    | Loss |
| DEL00025764 | chr3 | 35,861,481 | 35,862,001 | 520    | Loss |
| DEL00025766 | chr3 | 35,869,897 | 35,872,637 | 2,740  | Loss |
| DEL00025771 | chr3 | 35,926,212 | 35,926,623 | 411    | Loss |
| DEL00025775 | chr3 | 36,044,574 | 36,044,876 | 302    | Loss |
| DEL00025777 | chr3 | 36,069,851 | 36,070,950 | 1,099  | Loss |
| DEL00025780 | chr3 | 36,114,552 | 36,114,613 | 61     | Loss |
| DEL00025782 | chr3 | 36,132,579 | 36,132,822 | 243    | Loss |

|             |      |            |            |       |      |
|-------------|------|------------|------------|-------|------|
| DEL00025802 | chr3 | 36,664,559 | 36,664,640 | 81    | Loss |
| DEL00025814 | chr3 | 36,784,168 | 36,784,221 | 53    | Loss |
| DEL00025815 | chr3 | 36,817,471 | 36,817,554 | 83    | Loss |
| DEL00025821 | chr3 | 36,869,517 | 36,869,671 | 154   | Loss |
| DEL00025823 | chr3 | 36,915,330 | 36,918,167 | 2,837 | Loss |
| DEL00025827 | chr3 | 37,040,400 | 37,040,925 | 525   | Loss |
| DEL00025828 | chr3 | 37,052,838 | 37,053,007 | 169   | Loss |
| DEL00025835 | chr3 | 37,382,758 | 37,383,381 | 623   | Loss |
| DEL00025836 | chr3 | 37,399,700 | 37,399,837 | 137   | Loss |
| DEL00025838 | chr3 | 37,412,888 | 37,413,084 | 196   | Loss |
| DEL00025846 | chr3 | 37,550,891 | 37,550,992 | 101   | Loss |
| DEL00025847 | chr3 | 37,606,277 | 37,606,582 | 305   | Loss |
| DEL00025849 | chr3 | 37,608,504 | 37,608,639 | 135   | Loss |
| DEL00025853 | chr3 | 37,655,257 | 37,655,317 | 60    | Loss |
| DEL00025855 | chr3 | 37,672,650 | 37,672,725 | 75    | Loss |
| DEL00025866 | chr3 | 37,754,076 | 37,754,846 | 770   | Loss |
| DEL00025871 | chr3 | 37,914,306 | 37,914,457 | 151   | Loss |
| DEL00025872 | chr3 | 37,964,070 | 37,966,893 | 2,823 | Loss |
| DEL00025875 | chr3 | 38,002,465 | 38,003,061 | 596   | Loss |
| DEL00025877 | chr3 | 38,018,798 | 38,019,065 | 267   | Loss |
| DEL00025878 | chr3 | 38,039,496 | 38,039,892 | 396   | Loss |
| DEL00025880 | chr3 | 38,151,456 | 38,151,549 | 93    | Loss |
| DEL00025883 | chr3 | 38,183,521 | 38,183,633 | 112   | Loss |
| DEL00025886 | chr3 | 38,184,318 | 38,184,640 | 322   | Loss |
| DEL00025889 | chr3 | 38,364,239 | 38,364,955 | 716   | Loss |
| DUP00025891 | chr3 | 38,381,749 | 38,381,828 | 79    | Gain |
| DEL00025897 | chr3 | 38,473,721 | 38,475,057 | 1,336 | Loss |
| DEL00025898 | chr3 | 38,477,591 | 38,477,701 | 110   | Loss |
| DEL00025899 | chr3 | 38,499,389 | 38,500,442 | 1,053 | Loss |
| DEL00025900 | chr3 | 38,540,645 | 38,540,714 | 69    | Loss |
| DEL00025906 | chr3 | 38,600,322 | 38,600,387 | 65    | Loss |
| DEL00025908 | chr3 | 38,630,708 | 38,630,763 | 55    | Loss |
| DEL00025913 | chr3 | 38,840,079 | 38,840,859 | 780   | Loss |
| DEL00025915 | chr3 | 38,879,578 | 38,879,650 | 72    | Loss |
| DEL00025916 | chr3 | 38,906,598 | 38,906,660 | 62    | Loss |
| DEL00025918 | chr3 | 38,947,495 | 38,947,546 | 51    | Loss |
| DEL00025919 | chr3 | 39,031,992 | 39,032,113 | 121   | Loss |
| DEL00025926 | chr3 | 39,153,532 | 39,153,622 | 90    | Loss |
| DEL00025928 | chr3 | 39,157,576 | 39,157,647 | 71    | Loss |
| DEL00025931 | chr3 | 39,211,911 | 39,211,999 | 88    | Loss |
| DEL00025932 | chr3 | 39,233,483 | 39,233,668 | 185   | Loss |
| DEL00025934 | chr3 | 39,281,941 | 39,282,394 | 453   | Loss |
| DEL00025940 | chr3 | 39,425,597 | 39,426,169 | 572   | Loss |
| DEL00025943 | chr3 | 39,479,836 | 39,479,951 | 115   | Loss |
| DEL00025949 | chr3 | 39,553,474 | 39,553,654 | 180   | Loss |
| DEL00025950 | chr3 | 39,568,196 | 39,569,842 | 1,646 | Loss |
| DEL00025954 | chr3 | 39,611,180 | 39,616,856 | 5,676 | Loss |
| DEL00025955 | chr3 | 39,626,100 | 39,626,164 | 64    | Loss |
| DEL00025957 | chr3 | 39,634,942 | 39,635,117 | 175   | Loss |

|             |      |            |            |       |      |
|-------------|------|------------|------------|-------|------|
| DEL00025969 | chr3 | 39,900,874 | 39,901,374 | 500   | Loss |
| DEL00025972 | chr3 | 39,931,896 | 39,932,006 | 110   | Loss |
| DEL00025975 | chr3 | 40,004,783 | 40,004,873 | 90    | Loss |
| DEL00025977 | chr3 | 40,005,544 | 40,005,755 | 211   | Loss |
| DEL00025978 | chr3 | 40,009,493 | 40,009,679 | 186   | Loss |
| DEL00025979 | chr3 | 40,024,125 | 40,024,278 | 153   | Loss |
| DEL00025985 | chr3 | 40,122,856 | 40,123,086 | 230   | Loss |
| DEL00025986 | chr3 | 40,149,052 | 40,149,523 | 471   | Loss |
| DEL00025995 | chr3 | 40,275,147 | 40,275,285 | 138   | Loss |
| DEL00026002 | chr3 | 40,411,848 | 40,411,945 | 97    | Loss |
| DEL00026005 | chr3 | 40,507,687 | 40,507,749 | 62    | Loss |
| DEL00026013 | chr3 | 40,581,555 | 40,582,298 | 743   | Loss |
| DEL00026023 | chr3 | 40,841,131 | 40,841,908 | 777   | Loss |
| DEL00026024 | chr3 | 40,842,001 | 40,842,299 | 298   | Loss |
| DEL00026029 | chr3 | 40,896,562 | 40,896,720 | 158   | Loss |
| DEL00026034 | chr3 | 40,965,200 | 40,965,697 | 497   | Loss |
| DEL00026039 | chr3 | 41,073,762 | 41,074,476 | 714   | Loss |
| DEL00026043 | chr3 | 41,091,850 | 41,092,027 | 177   | Loss |
| DEL00026053 | chr3 | 41,184,570 | 41,184,688 | 118   | Loss |
| DEL00026057 | chr3 | 41,301,810 | 41,304,824 | 3,014 | Loss |
| DEL00026059 | chr3 | 41,316,361 | 41,316,439 | 78    | Loss |
| DEL00026060 | chr3 | 41,318,003 | 41,318,851 | 848   | Loss |
| DEL00026062 | chr3 | 41,344,066 | 41,344,268 | 202   | Loss |
| DEL00026068 | chr3 | 41,454,556 | 41,455,088 | 532   | Loss |
| DEL00026069 | chr3 | 41,472,523 | 41,472,618 | 95    | Loss |
| DEL00026074 | chr3 | 41,586,299 | 41,586,353 | 54    | Loss |
| DEL00026075 | chr3 | 41,598,431 | 41,598,642 | 211   | Loss |
| DEL00026083 | chr3 | 41,911,442 | 41,912,262 | 820   | Loss |
| DUP00026084 | chr3 | 41,937,807 | 41,937,940 | 133   | Gain |
| DEL00026087 | chr3 | 41,963,824 | 41,964,066 | 242   | Loss |
| DEL00026091 | chr3 | 42,085,172 | 42,085,233 | 61    | Loss |
| DEL00026095 | chr3 | 42,126,128 | 42,126,410 | 282   | Loss |
| DEL00026097 | chr3 | 42,129,538 | 42,129,898 | 360   | Loss |
| DEL00026105 | chr3 | 42,178,656 | 42,178,921 | 265   | Loss |
| DEL00026109 | chr3 | 42,237,151 | 42,237,485 | 334   | Loss |
| DEL00026113 | chr3 | 42,273,453 | 42,273,550 | 97    | Loss |
| DEL00026114 | chr3 | 42,280,930 | 42,281,140 | 210   | Loss |
| DEL00026115 | chr3 | 42,282,669 | 42,282,970 | 301   | Loss |
| DEL00026118 | chr3 | 42,326,716 | 42,327,641 | 925   | Loss |
| DUP00026121 | chr3 | 42,417,385 | 42,417,903 | 518   | Gain |
| DEL00026126 | chr3 | 42,457,311 | 42,457,397 | 86    | Loss |
| DEL00026143 | chr3 | 42,663,036 | 42,663,182 | 146   | Loss |
| DEL00026154 | chr3 | 42,771,444 | 42,771,519 | 75    | Loss |
| DEL00026155 | chr3 | 42,782,912 | 42,783,357 | 445   | Loss |
| DEL00026160 | chr3 | 42,881,247 | 42,881,333 | 86    | Loss |
| DEL00026162 | chr3 | 42,905,403 | 42,905,560 | 157   | Loss |
| DEL00026166 | chr3 | 42,951,136 | 42,951,223 | 87    | Loss |
| DEL00026170 | chr3 | 43,010,160 | 43,015,174 | 5,014 | Loss |
| DEL00026178 | chr3 | 43,128,053 | 43,128,255 | 202   | Loss |



|             |      |            |            |       |      |
|-------------|------|------------|------------|-------|------|
| DEL00026182 | chr3 | 43,189,275 | 43,189,450 | 175   | Loss |
| DEL00026193 | chr3 | 43,260,722 | 43,260,773 | 51    | Loss |
| DEL00026199 | chr3 | 43,358,824 | 43,359,514 | 690   | Loss |
| DEL00026207 | chr3 | 43,431,102 | 43,431,370 | 268   | Loss |
| DEL00026209 | chr3 | 43,561,889 | 43,562,357 | 468   | Loss |
| DEL00026217 | chr3 | 43,756,396 | 43,756,778 | 382   | Loss |
| DEL00026218 | chr3 | 43,757,302 | 43,757,378 | 76    | Loss |
| DEL00026222 | chr3 | 43,785,067 | 43,785,389 | 322   | Loss |
| DEL00026245 | chr3 | 44,160,580 | 44,160,688 | 108   | Loss |
| DEL00026247 | chr3 | 44,197,418 | 44,197,519 | 101   | Loss |
| DEL00026252 | chr3 | 44,348,904 | 44,349,451 | 547   | Loss |
| DEL00026254 | chr3 | 44,378,273 | 44,378,326 | 53    | Loss |
| DEL00026256 | chr3 | 44,424,971 | 44,426,950 | 1,979 | Loss |
| DEL00026260 | chr3 | 44,454,842 | 44,454,983 | 141   | Loss |
| DEL00026262 | chr3 | 44,456,485 | 44,456,779 | 294   | Loss |
| DEL00026263 | chr3 | 44,467,776 | 44,467,832 | 56    | Loss |
| DEL00026266 | chr3 | 44,503,031 | 44,503,086 | 55    | Loss |
| DUP00026268 | chr3 | 44,544,185 | 44,544,407 | 222   | Gain |
| DUP00026271 | chr3 | 44,632,440 | 44,632,510 | 70    | Gain |
| DEL00026273 | chr3 | 44,665,500 | 44,667,753 | 2,253 | Loss |
| DEL00026275 | chr3 | 44,681,857 | 44,682,606 | 749   | Loss |
| DEL00026279 | chr3 | 44,711,166 | 44,711,265 | 99    | Loss |
| DEL00026280 | chr3 | 44,713,078 | 44,713,173 | 95    | Loss |
| DUP00026285 | chr3 | 44,772,089 | 44,776,784 | 4,695 | Gain |
| DEL00026286 | chr3 | 44,777,394 | 44,780,098 | 2,704 | Loss |
| DEL00026304 | chr3 | 44,967,211 | 44,967,851 | 640   | Loss |
| DEL00026310 | chr3 | 45,026,298 | 45,026,664 | 366   | Loss |
| DEL00026312 | chr3 | 45,074,713 | 45,074,766 | 53    | Loss |
| DEL00026315 | chr3 | 45,159,223 | 45,160,065 | 842   | Loss |
| DEL00026316 | chr3 | 45,202,909 | 45,204,114 | 1,205 | Loss |
| DEL00026327 | chr3 | 45,325,633 | 45,325,880 | 247   | Loss |
| DEL00026332 | chr3 | 45,367,910 | 45,368,270 | 360   | Loss |
| DEL00026336 | chr3 | 45,527,651 | 45,527,764 | 113   | Loss |
| DEL00026337 | chr3 | 45,537,666 | 45,538,281 | 615   | Loss |
| DEL00026341 | chr3 | 45,614,795 | 45,615,606 | 811   | Loss |
| DEL00026342 | chr3 | 45,628,087 | 45,628,146 | 59    | Loss |
| DEL00026351 | chr3 | 45,801,002 | 45,801,585 | 583   | Loss |
| DEL00026360 | chr3 | 45,868,321 | 45,871,911 | 3,590 | Loss |
| DEL00026372 | chr3 | 46,024,493 | 46,025,740 | 1,247 | Loss |
| DEL00026373 | chr3 | 46,046,666 | 46,047,884 | 1,218 | Loss |
| DEL00026378 | chr3 | 46,137,389 | 46,137,442 | 53    | Loss |
| DEL00026379 | chr3 | 46,205,580 | 46,205,739 | 159   | Loss |
| DEL00026382 | chr3 | 46,226,431 | 46,226,953 | 522   | Loss |
| DEL00026386 | chr3 | 46,311,243 | 46,311,486 | 243   | Loss |
| DEL00026387 | chr3 | 46,337,362 | 46,338,314 | 952   | Loss |
| DEL00026392 | chr3 | 46,366,664 | 46,366,948 | 284   | Loss |
| DEL00026393 | chr3 | 46,408,378 | 46,409,484 | 1,106 | Loss |
| DEL00026395 | chr3 | 46,501,480 | 46,501,565 | 85    | Loss |
| DEL00026401 | chr3 | 46,739,390 | 46,739,944 | 554   | Loss |

|             |      |            |            |        |      |
|-------------|------|------------|------------|--------|------|
| DEL00026402 | chr3 | 46,740,208 | 46,740,286 | 78     | Loss |
| DEL00026406 | chr3 | 46,786,661 | 46,786,917 | 256    | Loss |
| DEL00026414 | chr3 | 46,910,427 | 46,910,530 | 103    | Loss |
| DEL00026417 | chr3 | 46,941,364 | 46,941,470 | 106    | Loss |
| DEL00026418 | chr3 | 46,960,924 | 46,961,339 | 415    | Loss |
| DEL00026421 | chr3 | 47,040,612 | 47,042,504 | 1,892  | Loss |
| DEL00026435 | chr3 | 47,269,515 | 47,269,578 | 63     | Loss |
| DEL00026440 | chr3 | 47,316,807 | 47,316,969 | 162    | Loss |
| DEL00026448 | chr3 | 47,398,357 | 47,399,954 | 1,597  | Loss |
| DEL00026453 | chr3 | 47,442,033 | 47,442,558 | 525    | Loss |
| DEL00026456 | chr3 | 47,468,403 | 47,483,749 | 15,346 | Loss |
| DEL00026461 | chr3 | 47,611,632 | 47,612,626 | 994    | Loss |
| DEL00026463 | chr3 | 47,753,725 | 47,753,784 | 59     | Loss |
| DEL00026467 | chr3 | 47,952,212 | 47,952,583 | 371    | Loss |
| DEL00026471 | chr3 | 48,013,811 | 48,014,791 | 980    | Loss |
| DEL00026472 | chr3 | 48,032,838 | 48,033,461 | 623    | Loss |
| DEL00026485 | chr3 | 48,155,285 | 48,155,361 | 76     | Loss |
| DEL00026486 | chr3 | 48,175,811 | 48,176,646 | 835    | Loss |
| DEL00026488 | chr3 | 48,247,378 | 48,247,526 | 148    | Loss |
| DEL00026491 | chr3 | 48,300,203 | 48,300,262 | 59     | Loss |
| DEL00026498 | chr3 | 48,411,661 | 48,411,729 | 68     | Loss |
| DEL00026500 | chr3 | 48,457,693 | 48,457,866 | 173    | Loss |
| DEL00026518 | chr3 | 48,822,650 | 48,823,105 | 455    | Loss |
| DEL00026521 | chr3 | 48,853,196 | 48,853,591 | 395    | Loss |
| DEL00026525 | chr3 | 48,901,841 | 48,902,064 | 223    | Loss |
| DEL00026529 | chr3 | 49,006,953 | 49,007,050 | 97     | Loss |
| DEL00026530 | chr3 | 49,010,644 | 49,010,792 | 148    | Loss |
| DEL00026539 | chr3 | 49,174,425 | 49,174,536 | 111    | Loss |
| DEL00026540 | chr3 | 49,186,076 | 49,186,151 | 75     | Loss |
| DEL00026543 | chr3 | 49,261,267 | 49,261,967 | 700    | Loss |
| DEL00026544 | chr3 | 49,306,960 | 49,307,042 | 82     | Loss |
| DEL00026545 | chr3 | 49,359,033 | 49,359,178 | 145    | Loss |
| DEL00026546 | chr3 | 49,364,320 | 49,364,435 | 115    | Loss |
| DEL00026547 | chr3 | 49,377,259 | 49,377,545 | 286    | Loss |
| DEL00026548 | chr3 | 49,380,171 | 49,380,486 | 315    | Loss |
| DEL00026549 | chr3 | 49,389,806 | 49,390,376 | 570    | Loss |
| DEL00026553 | chr3 | 49,458,873 | 49,458,947 | 74     | Loss |
| DEL00026561 | chr3 | 49,565,624 | 49,568,795 | 3,171  | Loss |
| DEL00026562 | chr3 | 49,586,706 | 49,586,799 | 93     | Loss |
| DEL00026567 | chr3 | 49,636,232 | 49,636,492 | 260    | Loss |
| DEL00026574 | chr3 | 49,762,325 | 49,762,614 | 289    | Loss |
| DEL00026577 | chr3 | 49,764,128 | 49,764,186 | 58     | Loss |
| DEL00026578 | chr3 | 49,810,502 | 49,810,943 | 441    | Loss |
| DEL00026580 | chr3 | 49,812,597 | 49,812,784 | 187    | Loss |
| DEL00026581 | chr3 | 49,833,153 | 49,833,254 | 101    | Loss |
| DEL00026582 | chr3 | 49,862,205 | 49,865,779 | 3,574  | Loss |
| DEL00026588 | chr3 | 50,143,296 | 50,143,620 | 324    | Loss |
| DEL00026591 | chr3 | 50,158,018 | 50,158,837 | 819    | Loss |
| DEL00026594 | chr3 | 50,365,289 | 50,365,506 | 217    | Loss |

|             |      |            |            |       |      |
|-------------|------|------------|------------|-------|------|
| DEL00026600 | chr3 | 50,432,140 | 50,432,295 | 155   | Loss |
| DEL00026605 | chr3 | 50,466,386 | 50,466,507 | 121   | Loss |
| DUP00026608 | chr3 | 50,595,181 | 50,603,143 | 7,962 | Gain |
| DEL00026612 | chr3 | 50,771,445 | 50,771,667 | 222   | Loss |
| DEL00026620 | chr3 | 50,872,570 | 50,872,745 | 175   | Loss |
| DEL00026628 | chr3 | 51,312,282 | 51,312,343 | 61    | Loss |
| DEL00026629 | chr3 | 51,393,575 | 51,394,149 | 574   | Loss |
| DEL00026632 | chr3 | 51,444,394 | 51,444,732 | 338   | Loss |
| DEL00026639 | chr3 | 51,666,628 | 51,666,681 | 53    | Loss |
| DEL00026642 | chr3 | 51,746,284 | 51,747,466 | 1,182 | Loss |
| DEL00026664 | chr3 | 52,098,021 | 52,098,072 | 51    | Loss |
| DEL00026667 | chr3 | 52,157,226 | 52,157,361 | 135   | Loss |
| DEL00026668 | chr3 | 52,169,404 | 52,169,796 | 392   | Loss |
| DEL00026669 | chr3 | 52,190,805 | 52,190,857 | 52    | Loss |
| DEL00026670 | chr3 | 52,247,792 | 52,248,184 | 392   | Loss |
| DEL00026674 | chr3 | 52,348,201 | 52,348,704 | 503   | Loss |
| DEL00026675 | chr3 | 52,370,515 | 52,370,983 | 468   | Loss |
| DEL00026680 | chr3 | 52,590,449 | 52,591,095 | 646   | Loss |
| DEL00026681 | chr3 | 52,615,578 | 52,615,683 | 105   | Loss |
| DEL00026684 | chr3 | 52,686,765 | 52,686,826 | 61    | Loss |
| DEL00026695 | chr3 | 52,971,760 | 52,971,817 | 57    | Loss |
| DEL00026697 | chr3 | 52,995,619 | 52,996,061 | 442   | Loss |
| DEL00026703 | chr3 | 53,129,241 | 53,129,404 | 163   | Loss |
| DEL00026709 | chr3 | 53,177,053 | 53,177,400 | 347   | Loss |
| DEL00026716 | chr3 | 53,306,259 | 53,306,313 | 54    | Loss |
| DEL00026717 | chr3 | 53,347,009 | 53,347,065 | 56    | Loss |
| DEL00026720 | chr3 | 53,388,850 | 53,388,911 | 61    | Loss |
| DEL00026721 | chr3 | 53,390,869 | 53,390,935 | 66    | Loss |
| DEL00026722 | chr3 | 53,393,720 | 53,394,490 | 770   | Loss |
| DEL00026723 | chr3 | 53,400,892 | 53,400,954 | 62    | Loss |
| DEL00026724 | chr3 | 53,426,079 | 53,426,659 | 580   | Loss |
| DEL00026726 | chr3 | 53,429,915 | 53,430,103 | 188   | Loss |
| DEL00026727 | chr3 | 53,448,659 | 53,448,933 | 274   | Loss |
| DUP00026728 | chr3 | 53,488,292 | 53,488,406 | 114   | Gain |
| DEL00026731 | chr3 | 53,496,249 | 53,496,668 | 419   | Loss |
| DEL00026737 | chr3 | 53,584,395 | 53,585,190 | 795   | Loss |
| DEL00026738 | chr3 | 53,585,597 | 53,585,651 | 54    | Loss |
| DEL00026742 | chr3 | 53,658,205 | 53,658,326 | 121   | Loss |
| DEL00026754 | chr3 | 53,826,576 | 53,827,434 | 858   | Loss |
| DEL00026756 | chr3 | 53,829,371 | 53,829,918 | 547   | Loss |
| DEL00026764 | chr3 | 53,937,107 | 53,937,178 | 71    | Loss |
| DEL00026767 | chr3 | 53,999,692 | 53,999,978 | 286   | Loss |
| DEL00026770 | chr3 | 54,019,221 | 54,019,400 | 179   | Loss |
| DEL00026772 | chr3 | 54,075,473 | 54,075,549 | 76    | Loss |
| DEL00026774 | chr3 | 54,082,544 | 54,082,628 | 84    | Loss |
| DEL00026775 | chr3 | 54,116,122 | 54,116,217 | 95    | Loss |
| DEL00026777 | chr3 | 54,168,282 | 54,168,366 | 84    | Loss |
| DEL00026778 | chr3 | 54,170,061 | 54,170,114 | 53    | Loss |
| DEL00026780 | chr3 | 54,187,316 | 54,188,800 | 1,484 | Loss |

|             |      |            |            |       |      |
|-------------|------|------------|------------|-------|------|
| DEL00026785 | chr3 | 54,228,745 | 54,229,040 | 295   | Loss |
| DEL00026788 | chr3 | 54,276,595 | 54,277,199 | 604   | Loss |
| DEL00026805 | chr3 | 54,560,683 | 54,560,756 | 73    | Loss |
| DEL00026810 | chr3 | 54,640,511 | 54,640,852 | 341   | Loss |
| DEL00026835 | chr3 | 55,093,001 | 55,093,072 | 71    | Loss |
| DEL00026842 | chr3 | 55,239,938 | 55,240,123 | 185   | Loss |
| DEL00026843 | chr3 | 55,240,231 | 55,242,983 | 2,752 | Loss |
| DEL00026846 | chr3 | 55,250,453 | 55,250,964 | 511   | Loss |
| DEL00026850 | chr3 | 55,394,479 | 55,394,599 | 120   | Loss |
| DEL00026856 | chr3 | 55,491,249 | 55,491,349 | 100   | Loss |
| DEL00026857 | chr3 | 55,503,461 | 55,503,666 | 205   | Loss |
| DEL00026858 | chr3 | 55,542,103 | 55,542,163 | 60    | Loss |
| DEL00026861 | chr3 | 55,561,803 | 55,562,037 | 234   | Loss |
| DEL00026864 | chr3 | 55,579,969 | 55,580,020 | 51    | Loss |
| DEL00026867 | chr3 | 55,854,842 | 55,854,907 | 65    | Loss |
| DEL00026868 | chr3 | 55,881,858 | 55,882,654 | 796   | Loss |
| DEL00026870 | chr3 | 55,897,671 | 55,897,953 | 282   | Loss |
| DEL00026876 | chr3 | 56,051,325 | 56,051,422 | 97    | Loss |
| DEL00026880 | chr3 | 56,081,316 | 56,081,419 | 103   | Loss |
| DEL00026885 | chr3 | 56,148,956 | 56,150,993 | 2,037 | Loss |
| DEL00026908 | chr3 | 56,364,771 | 56,365,008 | 237   | Loss |
| DEL00026913 | chr3 | 56,403,636 | 56,403,692 | 56    | Loss |
| DEL00026914 | chr3 | 56,413,047 | 56,413,172 | 125   | Loss |
| DEL00026916 | chr3 | 56,441,944 | 56,442,123 | 179   | Loss |
| DEL00026925 | chr3 | 56,717,500 | 56,717,572 | 72    | Loss |
| DEL00026926 | chr3 | 56,719,753 | 56,719,904 | 151   | Loss |
| DEL00026928 | chr3 | 56,793,774 | 56,793,830 | 56    | Loss |
| DEL00026929 | chr3 | 56,799,689 | 56,799,871 | 182   | Loss |
| DEL00026932 | chr3 | 56,822,211 | 56,822,279 | 68    | Loss |
| DUP00026933 | chr3 | 56,828,206 | 56,828,280 | 74    | Gain |
| DEL00026935 | chr3 | 56,854,582 | 56,854,742 | 160   | Loss |
| DEL00026938 | chr3 | 56,897,146 | 56,897,220 | 74    | Loss |
| DEL00026942 | chr3 | 56,914,879 | 56,914,939 | 60    | Loss |
| DEL00026943 | chr3 | 56,926,743 | 56,926,997 | 254   | Loss |
| DUP00026945 | chr3 | 56,940,640 | 56,940,746 | 106   | Gain |
| DEL00026956 | chr3 | 57,205,002 | 57,205,240 | 238   | Loss |
| DEL00026961 | chr3 | 57,298,825 | 57,298,895 | 70    | Loss |
| DEL00026964 | chr3 | 57,386,996 | 57,387,529 | 533   | Loss |
| DEL00026967 | chr3 | 57,499,108 | 57,499,738 | 630   | Loss |
| DEL00026970 | chr3 | 57,530,637 | 57,530,695 | 58    | Loss |
| DEL00026971 | chr3 | 57,542,922 | 57,543,403 | 481   | Loss |
| DEL00026972 | chr3 | 57,582,854 | 57,582,987 | 133   | Loss |
| DEL00026977 | chr3 | 57,684,128 | 57,693,242 | 9,114 | Loss |
| DEL00026981 | chr3 | 57,761,975 | 57,762,045 | 70    | Loss |
| DEL00026982 | chr3 | 57,787,702 | 57,789,173 | 1,471 | Loss |
| DEL00026984 | chr3 | 57,860,539 | 57,860,599 | 60    | Loss |
| DEL00026985 | chr3 | 57,864,515 | 57,864,632 | 117   | Loss |
| DEL00026987 | chr3 | 57,883,345 | 57,883,922 | 577   | Loss |
| DEL00026996 | chr3 | 58,042,727 | 58,042,834 | 107   | Loss |

|             |      |            |            |       |      |
|-------------|------|------------|------------|-------|------|
| DEL00026999 | chr3 | 58,066,746 | 58,066,912 | 166   | Loss |
| DEL00027005 | chr3 | 58,090,580 | 58,091,104 | 524   | Loss |
| DEL00027007 | chr3 | 58,127,638 | 58,128,187 | 549   | Loss |
| DEL00027008 | chr3 | 58,133,785 | 58,134,423 | 638   | Loss |
| DEL00027011 | chr3 | 58,236,988 | 58,237,130 | 142   | Loss |
| DEL00027014 | chr3 | 58,312,121 | 58,312,783 | 662   | Loss |
| DEL00027020 | chr3 | 58,421,833 | 58,421,968 | 135   | Loss |
| DEL00027023 | chr3 | 58,485,904 | 58,486,048 | 144   | Loss |
| DEL00027024 | chr3 | 58,493,104 | 58,493,943 | 839   | Loss |
| DEL00027025 | chr3 | 58,587,918 | 58,589,023 | 1,105 | Loss |
| DEL00027026 | chr3 | 58,604,043 | 58,604,164 | 121   | Loss |
| DEL00027033 | chr3 | 58,670,506 | 58,670,605 | 99    | Loss |
| DEL00027047 | chr3 | 59,083,122 | 59,083,217 | 95    | Loss |
| DUP00027048 | chr3 | 59,108,322 | 59,108,581 | 259   | Gain |
| DUP00027052 | chr3 | 59,216,969 | 59,226,118 | 9,149 | Gain |
| DEL00027061 | chr3 | 59,331,154 | 59,331,205 | 51    | Loss |
| DEL00027069 | chr3 | 59,455,254 | 59,455,427 | 173   | Loss |
| DEL00027072 | chr3 | 59,518,790 | 59,519,170 | 380   | Loss |
| DEL00027073 | chr3 | 59,519,691 | 59,520,001 | 310   | Loss |
| DEL00027086 | chr3 | 59,773,893 | 59,774,587 | 694   | Loss |
| DEL00027089 | chr3 | 59,804,344 | 59,804,736 | 392   | Loss |
| DEL00027101 | chr3 | 59,945,923 | 59,946,472 | 549   | Loss |
| DEL00027111 | chr3 | 60,015,342 | 60,015,536 | 194   | Loss |
| DEL00027121 | chr3 | 60,076,852 | 60,077,160 | 308   | Loss |
| DEL00027129 | chr3 | 60,184,768 | 60,185,417 | 649   | Loss |
| DEL00027131 | chr3 | 60,187,105 | 60,187,665 | 560   | Loss |
| DEL00027133 | chr3 | 60,310,617 | 60,310,674 | 57    | Loss |
| DEL00027138 | chr3 | 60,375,586 | 60,375,675 | 89    | Loss |
| DEL00027140 | chr3 | 60,391,516 | 60,392,052 | 536   | Loss |
| DEL00027141 | chr3 | 60,399,684 | 60,401,836 | 2,152 | Loss |
| DEL00027142 | chr3 | 60,436,705 | 60,437,119 | 414   | Loss |
| DEL00027153 | chr3 | 60,677,502 | 60,677,827 | 325   | Loss |
| DEL00027160 | chr3 | 60,707,027 | 60,708,108 | 1,081 | Loss |
| DEL00027162 | chr3 | 60,721,685 | 60,722,113 | 428   | Loss |
| DEL00027169 | chr3 | 60,747,652 | 60,749,047 | 1,395 | Loss |
| DEL00027171 | chr3 | 60,765,938 | 60,766,367 | 429   | Loss |
| DEL00027173 | chr3 | 60,790,965 | 60,791,440 | 475   | Loss |
| DEL00027174 | chr3 | 60,811,166 | 60,811,245 | 79    | Loss |
| DEL00027175 | chr3 | 60,852,284 | 60,852,794 | 510   | Loss |
| DEL00027182 | chr3 | 60,933,409 | 60,933,947 | 538   | Loss |
| DUP00027183 | chr3 | 60,941,742 | 60,941,875 | 133   | Gain |
| DEL00027188 | chr3 | 60,954,603 | 60,954,783 | 180   | Loss |
| DEL00027190 | chr3 | 60,976,375 | 60,976,465 | 90    | Loss |
| DEL00027197 | chr3 | 61,131,919 | 61,131,980 | 61    | Loss |
| DEL00027201 | chr3 | 61,202,721 | 61,203,648 | 927   | Loss |
| DEL00027203 | chr3 | 61,249,905 | 61,250,320 | 415   | Loss |
| DEL00027220 | chr3 | 61,569,983 | 61,570,496 | 513   | Loss |
| DEL00027221 | chr3 | 61,580,103 | 61,581,656 | 1,553 | Loss |
| DEL00027224 | chr3 | 61,602,540 | 61,602,599 | 59    | Loss |

|             |      |            |            |       |      |
|-------------|------|------------|------------|-------|------|
| DEL00027232 | chr3 | 61,702,173 | 61,702,368 | 195   | Loss |
| DEL00027237 | chr3 | 61,764,680 | 61,764,810 | 130   | Loss |
| DEL00027239 | chr3 | 61,796,400 | 61,797,420 | 1,020 | Loss |
| DEL00027251 | chr3 | 61,882,050 | 61,882,331 | 281   | Loss |
| DEL00027255 | chr3 | 61,975,997 | 61,976,584 | 587   | Loss |
| DEL00027259 | chr3 | 61,995,779 | 61,996,458 | 679   | Loss |
| DEL00027261 | chr3 | 62,057,997 | 62,058,085 | 88    | Loss |
| DEL00027266 | chr3 | 62,209,247 | 62,210,479 | 1,232 | Loss |
| DEL00027268 | chr3 | 62,232,952 | 62,233,843 | 891   | Loss |
| DEL00027270 | chr3 | 62,247,173 | 62,247,297 | 124   | Loss |
| DEL00027272 | chr3 | 62,319,095 | 62,319,294 | 199   | Loss |
| DEL00027273 | chr3 | 62,419,956 | 62,420,034 | 78    | Loss |
| DEL00027275 | chr3 | 62,484,269 | 62,484,416 | 147   | Loss |
| DEL00027276 | chr3 | 62,564,190 | 62,564,244 | 54    | Loss |
| DEL00027278 | chr3 | 62,565,324 | 62,566,109 | 785   | Loss |
| DEL00027281 | chr3 | 62,597,310 | 62,597,361 | 51    | Loss |
| DEL00027282 | chr3 | 62,611,782 | 62,612,006 | 224   | Loss |
| DEL00027288 | chr3 | 62,729,895 | 62,730,355 | 460   | Loss |
| DEL00027294 | chr3 | 62,826,310 | 62,827,222 | 912   | Loss |
| DEL00027304 | chr3 | 63,004,762 | 63,004,869 | 107   | Loss |
| DEL00027312 | chr3 | 63,173,148 | 63,173,931 | 783   | Loss |
| DEL00027316 | chr3 | 63,276,465 | 63,276,873 | 408   | Loss |
| DEL00027317 | chr3 | 63,334,550 | 63,334,732 | 182   | Loss |
| DEL00027336 | chr3 | 63,640,082 | 63,640,205 | 123   | Loss |
| DEL00027339 | chr3 | 63,704,313 | 63,704,711 | 398   | Loss |
| DEL00027340 | chr3 | 63,751,321 | 63,751,574 | 253   | Loss |
| DEL00027345 | chr3 | 63,826,183 | 63,826,285 | 102   | Loss |
| DEL00027347 | chr3 | 63,828,978 | 63,829,033 | 55    | Loss |
| DEL00027348 | chr3 | 63,829,258 | 63,829,802 | 544   | Loss |
| DEL00027350 | chr3 | 63,841,279 | 63,841,364 | 85    | Loss |
| DEL00027369 | chr3 | 64,279,125 | 64,279,867 | 742   | Loss |
| DEL00027375 | chr3 | 64,353,315 | 64,353,468 | 153   | Loss |
| DEL00027377 | chr3 | 64,391,133 | 64,397,564 | 6,431 | Loss |
| DEL00027380 | chr3 | 64,420,473 | 64,421,033 | 560   | Loss |
| DEL00027392 | chr3 | 64,615,066 | 64,615,190 | 124   | Loss |
| DEL00027394 | chr3 | 64,644,582 | 64,644,649 | 67    | Loss |
| DEL00027396 | chr3 | 64,658,386 | 64,662,748 | 4,362 | Loss |
| DEL00027401 | chr3 | 64,709,433 | 64,709,580 | 147   | Loss |
| DEL00027404 | chr3 | 64,784,452 | 64,784,524 | 72    | Loss |
| DEL00027406 | chr3 | 64,858,153 | 64,858,420 | 267   | Loss |
| DEL00027416 | chr3 | 65,045,033 | 65,046,459 | 1,426 | Loss |
| DEL00027429 | chr3 | 65,261,053 | 65,261,980 | 927   | Loss |
| DEL00027433 | chr3 | 65,319,413 | 65,320,041 | 628   | Loss |
| DEL00027437 | chr3 | 65,347,429 | 65,347,497 | 68    | Loss |
| DEL00027445 | chr3 | 65,470,934 | 65,471,790 | 856   | Loss |
| DEL00027447 | chr3 | 65,517,182 | 65,517,278 | 96    | Loss |
| DEL00027450 | chr3 | 65,538,044 | 65,538,900 | 856   | Loss |
| DEL00027456 | chr3 | 65,588,482 | 65,589,101 | 619   | Loss |
| DEL00027463 | chr3 | 65,729,574 | 65,729,915 | 341   | Loss |

|             |      |            |            |        |      |
|-------------|------|------------|------------|--------|------|
| DEL00027466 | chr3 | 65,753,819 | 65,753,936 | 117    | Loss |
| DEL00027468 | chr3 | 65,772,282 | 65,772,333 | 51     | Loss |
| DEL00027470 | chr3 | 65,793,443 | 65,793,549 | 106    | Loss |
| DEL00027476 | chr3 | 65,860,201 | 65,860,491 | 290    | Loss |
| DEL00027482 | chr3 | 66,065,814 | 66,066,064 | 250    | Loss |
| DEL00027484 | chr3 | 66,094,515 | 66,094,607 | 92     | Loss |
| DEL00027489 | chr3 | 66,196,159 | 66,196,763 | 604    | Loss |
| DEL00027490 | chr3 | 66,261,848 | 66,261,967 | 119    | Loss |
| DEL00027492 | chr3 | 66,287,759 | 66,287,878 | 119    | Loss |
| DEL00027495 | chr3 | 66,307,168 | 66,309,152 | 1,984  | Loss |
| DEL00027497 | chr3 | 66,340,436 | 66,340,489 | 53     | Loss |
| DEL00027502 | chr3 | 66,370,807 | 66,370,860 | 53     | Loss |
| DEL00027508 | chr3 | 66,442,425 | 66,442,620 | 195    | Loss |
| DEL00027514 | chr3 | 66,527,288 | 66,527,463 | 175    | Loss |
| DEL00027515 | chr3 | 66,541,609 | 66,541,682 | 73     | Loss |
| DEL00027516 | chr3 | 66,566,278 | 66,566,902 | 624    | Loss |
| DEL00027523 | chr3 | 66,648,945 | 66,649,166 | 221    | Loss |
| DEL00027524 | chr3 | 66,660,248 | 66,660,440 | 192    | Loss |
| DEL00027525 | chr3 | 66,678,623 | 66,679,168 | 545    | Loss |
| DEL00027526 | chr3 | 66,694,848 | 66,694,955 | 107    | Loss |
| DEL00027534 | chr3 | 66,729,182 | 66,729,262 | 80     | Loss |
| DEL00027543 | chr3 | 66,814,854 | 66,815,049 | 195    | Loss |
| DEL00027551 | chr3 | 66,886,126 | 66,886,249 | 123    | Loss |
| DEL00027553 | chr3 | 66,925,658 | 66,926,827 | 1,169  | Loss |
| DEL00027562 | chr3 | 67,050,987 | 67,051,130 | 143    | Loss |
| DEL00027571 | chr3 | 67,166,455 | 67,167,342 | 887    | Loss |
| DEL00027580 | chr3 | 67,250,291 | 67,250,517 | 226    | Loss |
| DUP00027585 | chr3 | 67,369,711 | 67,382,096 | 12,385 | Gain |
| DEL00027586 | chr3 | 67,409,323 | 67,409,644 | 321    | Loss |
| DEL00027592 | chr3 | 67,527,625 | 67,527,786 | 161    | Loss |
| DEL00027596 | chr3 | 67,559,079 | 67,559,277 | 198    | Loss |
| DEL00027601 | chr3 | 67,626,734 | 67,628,925 | 2,191  | Loss |
| DEL00027605 | chr3 | 67,909,438 | 67,909,492 | 54     | Loss |
| DEL00027609 | chr3 | 67,949,436 | 67,949,506 | 70     | Loss |
| DEL00027615 | chr3 | 68,036,268 | 68,036,330 | 62     | Loss |
| DEL00027620 | chr3 | 68,113,432 | 68,113,484 | 52     | Loss |
| DEL00027640 | chr3 | 68,685,916 | 68,686,616 | 700    | Loss |
| DEL00027642 | chr3 | 68,749,626 | 68,749,681 | 55     | Loss |
| DUP00027648 | chr3 | 68,796,173 | 68,807,194 | 11,021 | Gain |
| DEL00027650 | chr3 | 68,881,860 | 68,881,932 | 72     | Loss |
| DEL00027659 | chr3 | 69,114,108 | 69,117,297 | 3,189  | Loss |
| DEL00027663 | chr3 | 69,323,414 | 69,323,477 | 63     | Loss |
| DEL00027668 | chr3 | 69,494,341 | 69,495,028 | 687    | Loss |
| DEL00027674 | chr3 | 69,588,624 | 69,590,303 | 1,679  | Loss |
| DEL00027675 | chr3 | 69,608,283 | 69,610,415 | 2,132  | Loss |
| DEL00027685 | chr3 | 69,677,458 | 69,678,162 | 704    | Loss |
| DEL00027689 | chr3 | 69,696,726 | 69,698,431 | 1,705  | Loss |
| DEL00027700 | chr3 | 69,766,671 | 69,768,433 | 1,762  | Loss |
| DEL00027705 | chr3 | 69,773,278 | 69,783,928 | 10,650 | Loss |

|             |      |            |            |        |      |
|-------------|------|------------|------------|--------|------|
| DEL00027709 | chr3 | 69,798,999 | 69,801,184 | 2,185  | Loss |
| DEL00027729 | chr3 | 70,176,433 | 70,176,991 | 558    | Loss |
| DEL00027737 | chr3 | 70,245,387 | 70,246,972 | 1,585  | Loss |
| DEL00027738 | chr3 | 70,264,118 | 70,264,220 | 102    | Loss |
| DEL00027740 | chr3 | 70,271,062 | 70,271,740 | 678    | Loss |
| DEL00027746 | chr3 | 70,386,689 | 70,386,979 | 290    | Loss |
| DEL00027753 | chr3 | 70,508,075 | 70,509,132 | 1,057  | Loss |
| DEL00027755 | chr3 | 70,564,592 | 70,567,350 | 2,758  | Loss |
| DEL00027756 | chr3 | 70,568,293 | 70,568,741 | 448    | Loss |
| DEL00027759 | chr3 | 70,599,798 | 70,599,852 | 54     | Loss |
| DEL00027765 | chr3 | 70,708,819 | 70,709,076 | 257    | Loss |
| DEL00027766 | chr3 | 70,742,867 | 70,743,094 | 227    | Loss |
| DEL00027768 | chr3 | 70,760,378 | 70,760,470 | 92     | Loss |
| DEL00027781 | chr3 | 71,026,891 | 71,027,153 | 262    | Loss |
| DEL00027783 | chr3 | 71,058,633 | 71,058,782 | 149    | Loss |
| DEL00027788 | chr3 | 71,077,600 | 71,077,701 | 101    | Loss |
| DEL00027794 | chr3 | 71,161,558 | 71,161,965 | 407    | Loss |
| DEL00027798 | chr3 | 71,201,153 | 71,201,221 | 68     | Loss |
| DEL00027800 | chr3 | 71,226,031 | 71,227,086 | 1,055  | Loss |
| DEL00027812 | chr3 | 71,384,996 | 71,385,056 | 60     | Loss |
| DEL00027814 | chr3 | 71,436,376 | 71,436,468 | 92     | Loss |
| DEL00027822 | chr3 | 71,664,523 | 71,664,643 | 120    | Loss |
| DEL00027824 | chr3 | 71,748,265 | 71,748,393 | 128    | Loss |
| DEL00027831 | chr3 | 71,922,152 | 71,922,730 | 578    | Loss |
| DEL00027832 | chr3 | 71,929,982 | 71,930,460 | 478    | Loss |
| DEL00027834 | chr3 | 71,957,692 | 71,957,806 | 114    | Loss |
| DEL00027837 | chr3 | 72,030,270 | 72,030,632 | 362    | Loss |
| DEL00027838 | chr3 | 72,041,060 | 72,042,429 | 1,369  | Loss |
| DEL00027841 | chr3 | 72,115,534 | 72,115,586 | 52     | Loss |
| DEL00027842 | chr3 | 72,117,817 | 72,118,066 | 249    | Loss |
| DEL00027845 | chr3 | 72,142,870 | 72,143,372 | 502    | Loss |
| DEL00027848 | chr3 | 72,199,991 | 72,200,404 | 413    | Loss |
| DEL00027866 | chr3 | 72,327,145 | 72,328,131 | 986    | Loss |
| DEL00027867 | chr3 | 72,332,504 | 72,332,661 | 157    | Loss |
| DEL00027868 | chr3 | 72,343,123 | 72,343,290 | 167    | Loss |
| DEL00027874 | chr3 | 72,455,239 | 72,455,297 | 58     | Loss |
| DEL00027879 | chr3 | 72,519,548 | 72,520,332 | 784    | Loss |
| DEL00027880 | chr3 | 72,535,774 | 72,535,858 | 84     | Loss |
| DEL00027907 | chr3 | 72,645,187 | 72,645,488 | 301    | Loss |
| DEL00027913 | chr3 | 72,736,591 | 72,736,764 | 173    | Loss |
| DEL00027920 | chr3 | 72,772,466 | 72,772,576 | 110    | Loss |
| DUP00027924 | chr3 | 72,801,587 | 72,821,049 | 19,462 | Gain |
| DEL00027929 | chr3 | 72,863,165 | 72,864,832 | 1,667  | Loss |
| DEL00027932 | chr3 | 72,929,220 | 72,929,292 | 72     | Loss |
| DEL00027933 | chr3 | 72,951,159 | 72,951,507 | 348    | Loss |
| DEL00027938 | chr3 | 73,078,066 | 73,078,127 | 61     | Loss |
| DUP00027939 | chr3 | 73,078,782 | 73,080,937 | 2,155  | Gain |
| DEL00027943 | chr3 | 73,155,516 | 73,157,263 | 1,747  | Loss |
| DEL00027948 | chr3 | 73,170,910 | 73,171,106 | 196    | Loss |



|             |      |            |            |        |       |
|-------------|------|------------|------------|--------|-------|
| DEL00027952 | chr3 | 73,220,871 | 73,221,424 | 553    | Loss  |
| DEL00027953 | chr3 | 73,225,219 | 73,228,015 | 2,796  | Loss  |
| DEL00027956 | chr3 | 73,257,971 | 73,258,074 | 103    | Loss  |
| DEL00027963 | chr3 | 73,455,955 | 73,456,512 | 557    | Loss  |
| DEL00027965 | chr3 | 73,481,601 | 73,482,433 | 832    | Loss  |
| DEL00027967 | chr3 | 73,536,146 | 73,536,215 | 69     | Loss  |
| DEL00027977 | chr3 | 73,648,410 | 73,648,475 | 65     | Loss  |
| DEL00027981 | chr3 | 73,749,992 | 73,750,107 | 115    | Loss  |
| DEL00027985 | chr3 | 73,883,687 | 73,884,128 | 441    | Loss  |
| DEL00027987 | chr3 | 73,944,664 | 73,945,282 | 618    | Loss  |
| DEL00027988 | chr3 | 74,082,597 | 74,082,918 | 321    | Loss  |
| DEL00027989 | chr3 | 74,088,040 | 74,088,331 | 291    | Loss  |
| DEL00028001 | chr3 | 74,207,793 | 74,207,903 | 110    | Loss  |
| DEL00028003 | chr3 | 74,257,349 | 74,258,035 | 686    | Loss  |
| DEL00028004 | chr3 | 74,266,250 | 74,267,203 | 953    | Loss  |
| DUP00028007 | chr3 | 74,302,011 | 74,325,533 | 23,522 | Mixed |
| DEL00028019 | chr3 | 74,507,071 | 74,507,672 | 601    | Loss  |
| DEL00028020 | chr3 | 74,508,217 | 74,511,118 | 2,901  | Loss  |
| DEL00028028 | chr3 | 74,731,394 | 74,731,500 | 106    | Loss  |
| DEL00028029 | chr3 | 74,733,176 | 74,733,270 | 94     | Loss  |
| DEL00028037 | chr3 | 74,975,198 | 74,975,290 | 92     | Loss  |
| DEL00028040 | chr3 | 75,121,995 | 75,122,128 | 133    | Loss  |
| DEL00028048 | chr3 | 75,369,577 | 75,369,963 | 386    | Loss  |
| DEL00028050 | chr3 | 75,373,091 | 75,373,143 | 52     | Loss  |
| DEL00028052 | chr3 | 75,378,428 | 75,378,753 | 325    | Loss  |
| DEL00028054 | chr3 | 75,387,864 | 75,388,877 | 1,013  | Loss  |
| DEL00028056 | chr3 | 75,429,435 | 75,430,288 | 853    | Loss  |
| DEL00028057 | chr3 | 75,438,011 | 75,438,080 | 69     | Loss  |
| DEL00028066 | chr3 | 75,516,895 | 75,516,951 | 56     | Loss  |
| DEL00028067 | chr3 | 75,524,922 | 75,525,107 | 185    | Loss  |
| DEL00028069 | chr3 | 75,531,818 | 75,532,768 | 950    | Loss  |
| DEL00028075 | chr3 | 75,558,109 | 75,558,380 | 271    | Loss  |
| DEL00028078 | chr3 | 75,571,766 | 75,572,217 | 451    | Loss  |
| DEL00028087 | chr3 | 75,643,695 | 75,644,856 | 1,161  | Loss  |
| DEL00028088 | chr3 | 75,645,217 | 75,645,519 | 302    | Loss  |
| DEL00028090 | chr3 | 75,697,223 | 75,697,566 | 343    | Loss  |
| DEL00028093 | chr3 | 75,728,384 | 75,728,498 | 114    | Loss  |
| DEL00028107 | chr3 | 75,863,796 | 75,864,490 | 694    | Loss  |
| DEL00028108 | chr3 | 75,941,614 | 75,941,674 | 60     | Loss  |
| DEL00028110 | chr3 | 76,018,847 | 76,018,907 | 60     | Loss  |
| DEL00028126 | chr3 | 76,215,589 | 76,215,661 | 72     | Loss  |
| DEL00028129 | chr3 | 76,246,763 | 76,247,044 | 281    | Loss  |
| DEL00028135 | chr3 | 76,378,596 | 76,378,682 | 86     | Loss  |
| DUP00028136 | chr3 | 76,440,859 | 76,446,516 | 5,657  | Gain  |
| DEL00028138 | chr3 | 76,448,851 | 76,448,957 | 106    | Loss  |
| DEL00028143 | chr3 | 76,526,677 | 76,526,837 | 160    | Loss  |
| DEL00028145 | chr3 | 76,531,007 | 76,531,063 | 56     | Loss  |
| DEL00028153 | chr3 | 76,595,046 | 76,595,419 | 373    | Loss  |
| DEL00028156 | chr3 | 76,676,709 | 76,676,813 | 104    | Loss  |

|             |      |            |            |       |      |
|-------------|------|------------|------------|-------|------|
| DEL00028171 | chr3 | 76,844,809 | 76,845,267 | 458   | Loss |
| DEL00028175 | chr3 | 76,926,051 | 76,926,315 | 264   | Loss |
| DEL00028184 | chr3 | 77,122,200 | 77,122,268 | 68    | Loss |
| DEL00028201 | chr3 | 77,446,636 | 77,448,285 | 1,649 | Loss |
| DEL00028204 | chr3 | 77,517,104 | 77,517,842 | 738   | Loss |
| DEL00028207 | chr3 | 77,580,943 | 77,581,356 | 413   | Loss |
| DEL00028219 | chr3 | 77,769,883 | 77,770,337 | 454   | Loss |
| DEL00028220 | chr3 | 77,786,609 | 77,786,840 | 231   | Loss |
| DEL00028226 | chr3 | 77,883,891 | 77,884,000 | 109   | Loss |
| DEL00028229 | chr3 | 77,906,250 | 77,906,330 | 80    | Loss |
| DEL00028233 | chr3 | 77,938,256 | 77,938,726 | 470   | Loss |
| DEL00028246 | chr3 | 78,089,940 | 78,089,995 | 55    | Loss |
| DUP00028250 | chr3 | 78,147,635 | 78,147,957 | 322   | Gain |
| DEL00028251 | chr3 | 78,166,224 | 78,166,299 | 75    | Loss |
| DEL00028255 | chr3 | 78,216,395 | 78,216,970 | 575   | Loss |
| DUP00028256 | chr3 | 78,229,143 | 78,229,856 | 713   | Gain |
| DEL00028257 | chr3 | 78,231,877 | 78,232,033 | 156   | Loss |
| DEL00028258 | chr3 | 78,246,353 | 78,246,724 | 371   | Loss |
| DEL00028261 | chr3 | 78,260,173 | 78,260,225 | 52    | Loss |
| DUP00028263 | chr3 | 78,277,181 | 78,277,246 | 65    | Gain |
| DEL00028264 | chr3 | 78,302,689 | 78,303,141 | 452   | Loss |
| DEL00028272 | chr3 | 78,500,494 | 78,500,772 | 278   | Loss |
| DEL00028273 | chr3 | 78,526,118 | 78,526,252 | 134   | Loss |
| DEL00028274 | chr3 | 78,526,430 | 78,528,307 | 1,877 | Loss |
| DEL00028283 | chr3 | 78,624,800 | 78,625,527 | 727   | Loss |
| DEL00028285 | chr3 | 78,634,219 | 78,634,622 | 403   | Loss |
| DEL00028289 | chr3 | 78,662,109 | 78,663,081 | 972   | Loss |
| DEL00028293 | chr3 | 78,728,789 | 78,728,889 | 100   | Loss |
| DEL00028295 | chr3 | 78,737,074 | 78,737,278 | 204   | Loss |
| DEL00028296 | chr3 | 78,752,289 | 78,752,355 | 66    | Loss |
| DEL00028301 | chr3 | 78,848,847 | 78,849,009 | 162   | Loss |
| DEL00028303 | chr3 | 78,863,678 | 78,864,198 | 520   | Loss |
| DEL00028304 | chr3 | 78,867,290 | 78,867,410 | 120   | Loss |
| DEL00028305 | chr3 | 78,869,077 | 78,869,144 | 67    | Loss |
| DEL00028316 | chr3 | 79,080,364 | 79,080,435 | 71    | Loss |
| DEL00028318 | chr3 | 79,087,480 | 79,087,566 | 86    | Loss |
| DEL00028323 | chr3 | 79,155,365 | 79,155,673 | 308   | Loss |
| DUP00028326 | chr3 | 79,204,165 | 79,204,281 | 116   | Gain |
| DEL00028327 | chr3 | 79,229,412 | 79,229,493 | 81    | Loss |
| DEL00028337 | chr3 | 79,321,359 | 79,321,979 | 620   | Loss |
| DEL00028341 | chr3 | 79,402,011 | 79,402,255 | 244   | Loss |
| DEL00028343 | chr3 | 79,443,691 | 79,443,771 | 80    | Loss |
| DEL00028352 | chr3 | 79,564,154 | 79,565,741 | 1,587 | Loss |
| DEL00028357 | chr3 | 79,691,459 | 79,692,476 | 1,017 | Loss |
| DEL00028360 | chr3 | 79,714,385 | 79,714,436 | 51    | Loss |
| DEL00028361 | chr3 | 79,729,531 | 79,729,647 | 116   | Loss |
| DEL00028363 | chr3 | 79,739,433 | 79,739,852 | 419   | Loss |
| DEL00028365 | chr3 | 79,760,796 | 79,760,927 | 131   | Loss |
| DEL00028371 | chr3 | 79,785,768 | 79,785,865 | 97    | Loss |

|             |      |            |            |       |      |
|-------------|------|------------|------------|-------|------|
| DEL00028379 | chr3 | 79,815,621 | 79,817,305 | 1,684 | Loss |
| DEL00028382 | chr3 | 79,872,063 | 79,872,122 | 59    | Loss |
| DEL00028385 | chr3 | 79,891,998 | 79,892,438 | 440   | Loss |
| DEL00028396 | chr3 | 80,054,846 | 80,055,294 | 448   | Loss |
| DEL00028398 | chr3 | 80,112,714 | 80,112,981 | 267   | Loss |
| DEL00028403 | chr3 | 80,137,797 | 80,138,754 | 957   | Loss |
| DEL00028408 | chr3 | 80,179,662 | 80,180,056 | 394   | Loss |
| DEL00028410 | chr3 | 80,184,119 | 80,184,248 | 129   | Loss |
| DEL00028413 | chr3 | 80,208,932 | 80,209,459 | 527   | Loss |
| DEL00028419 | chr3 | 80,260,144 | 80,260,632 | 488   | Loss |
| DEL00028421 | chr3 | 80,263,835 | 80,263,934 | 99    | Loss |
| DEL00028422 | chr3 | 80,292,888 | 80,292,940 | 52    | Loss |
| DEL00028423 | chr3 | 80,311,488 | 80,311,665 | 177   | Loss |
| DEL00028424 | chr3 | 80,312,085 | 80,312,890 | 805   | Loss |
| DEL00028431 | chr3 | 80,453,733 | 80,453,796 | 63    | Loss |
| DEL00028440 | chr3 | 80,544,441 | 80,544,521 | 80    | Loss |
| DEL00028441 | chr3 | 80,546,374 | 80,546,452 | 78    | Loss |
| DEL00028458 | chr3 | 80,728,044 | 80,728,494 | 450   | Loss |
| DEL00028459 | chr3 | 80,749,122 | 80,749,176 | 54    | Loss |
| DEL00028463 | chr3 | 80,814,582 | 80,815,054 | 472   | Loss |
| DUP00028465 | chr3 | 80,851,396 | 80,853,337 | 1,941 | Gain |
| DEL00028468 | chr3 | 80,869,584 | 80,869,803 | 219   | Loss |
| DEL00028469 | chr3 | 80,887,601 | 80,887,676 | 75    | Loss |
| DEL00028474 | chr3 | 80,916,767 | 80,917,642 | 875   | Loss |
| DEL00028483 | chr3 | 80,999,781 | 80,999,844 | 63    | Loss |
| DEL00028488 | chr3 | 81,019,600 | 81,021,609 | 2,009 | Loss |
| DEL00028492 | chr3 | 81,137,379 | 81,137,771 | 392   | Loss |
| DEL00028495 | chr3 | 81,183,838 | 81,183,904 | 66    | Loss |
| DEL00028499 | chr3 | 81,234,908 | 81,234,959 | 51    | Loss |
| DEL00028502 | chr3 | 81,278,197 | 81,278,700 | 503   | Loss |
| DEL00028504 | chr3 | 81,322,836 | 81,322,895 | 59    | Loss |
| DEL00028512 | chr3 | 81,366,600 | 81,366,692 | 92    | Loss |
| DEL00028520 | chr3 | 81,494,268 | 81,494,326 | 58    | Loss |
| DEL00028521 | chr3 | 81,560,432 | 81,560,619 | 187   | Loss |
| DEL00028525 | chr3 | 81,678,585 | 81,686,002 | 7,417 | Loss |
| DEL00028526 | chr3 | 81,702,490 | 81,703,446 | 956   | Loss |
| DEL00028536 | chr3 | 81,892,670 | 81,892,726 | 56    | Loss |
| DEL00028543 | chr3 | 81,993,548 | 81,993,766 | 218   | Loss |
| DEL00028545 | chr3 | 82,026,462 | 82,026,537 | 75    | Loss |
| DEL00028547 | chr3 | 82,044,023 | 82,044,401 | 378   | Loss |
| DEL00028548 | chr3 | 82,053,771 | 82,053,964 | 193   | Loss |
| DEL00028551 | chr3 | 82,085,137 | 82,085,241 | 104   | Loss |
| DEL00028552 | chr3 | 82,094,382 | 82,095,790 | 1,408 | Loss |
| DEL00028553 | chr3 | 82,106,087 | 82,106,265 | 178   | Loss |
| DEL00028555 | chr3 | 82,135,796 | 82,135,962 | 166   | Loss |
| DEL00028561 | chr3 | 82,185,136 | 82,185,189 | 53    | Loss |
| DEL00028563 | chr3 | 82,281,128 | 82,281,454 | 326   | Loss |
| DEL00028564 | chr3 | 82,332,945 | 82,333,007 | 62    | Loss |
| DEL00028569 | chr3 | 82,508,800 | 82,510,245 | 1,445 | Loss |

|             |      |            |            |        |      |
|-------------|------|------------|------------|--------|------|
| DEL00028574 | chr3 | 82,572,409 | 82,573,915 | 1,506  | Loss |
| DEL00028575 | chr3 | 82,604,474 | 82,605,029 | 555    | Loss |
| DEL00028576 | chr3 | 82,628,345 | 82,629,400 | 1,055  | Loss |
| DEL00028579 | chr3 | 82,717,140 | 82,720,095 | 2,955  | Loss |
| DUP00028584 | chr3 | 82,752,608 | 82,752,728 | 120    | Gain |
| DEL00028594 | chr3 | 82,816,038 | 82,816,335 | 297    | Loss |
| DEL00028598 | chr3 | 82,946,135 | 82,946,587 | 452    | Loss |
| DEL00028600 | chr3 | 82,950,737 | 82,951,150 | 413    | Loss |
| DEL00028607 | chr3 | 83,028,336 | 83,028,427 | 91     | Loss |
| DEL00028608 | chr3 | 83,036,712 | 83,037,519 | 807    | Loss |
| DEL00028613 | chr3 | 83,098,465 | 83,098,521 | 56     | Loss |
| DEL00028615 | chr3 | 83,108,181 | 83,108,393 | 212    | Loss |
| DEL00028621 | chr3 | 83,333,477 | 83,333,546 | 69     | Loss |
| DEL00028627 | chr3 | 83,476,014 | 83,476,904 | 890    | Loss |
| DEL00028629 | chr3 | 83,564,700 | 83,565,616 | 916    | Loss |
| DEL00028633 | chr3 | 83,639,648 | 83,640,258 | 610    | Loss |
| DEL00028634 | chr3 | 83,640,761 | 83,641,278 | 517    | Loss |
| DEL00028638 | chr3 | 83,659,260 | 83,659,314 | 54     | Loss |
| DEL00028641 | chr3 | 83,675,947 | 83,680,613 | 4,666  | Loss |
| DEL00028653 | chr3 | 83,914,297 | 83,914,846 | 549    | Loss |
| DEL00028654 | chr3 | 83,917,890 | 83,918,288 | 398    | Loss |
| DEL00028660 | chr3 | 84,021,165 | 84,021,263 | 98     | Loss |
| DEL00028661 | chr3 | 84,028,112 | 84,031,079 | 2,967  | Loss |
| DEL00028668 | chr3 | 84,196,876 | 84,197,796 | 920    | Loss |
| DEL00028682 | chr3 | 84,540,242 | 84,540,870 | 628    | Loss |
| DEL00028684 | chr3 | 84,608,365 | 84,608,866 | 501    | Loss |
| DEL00028685 | chr3 | 84,628,894 | 84,629,490 | 596    | Loss |
| DUP00028696 | chr3 | 84,834,333 | 84,834,414 | 81     | Gain |
| DEL00028698 | chr3 | 84,893,763 | 84,899,588 | 5,825  | Loss |
| DEL00028702 | chr3 | 84,943,014 | 84,944,217 | 1,203  | Loss |
| DEL00028715 | chr3 | 85,352,120 | 85,356,185 | 4,065  | Loss |
| DUP00028718 | chr3 | 85,429,241 | 85,450,177 | 20,936 | Gain |
| DEL00028725 | chr3 | 85,518,608 | 85,518,663 | 55     | Loss |
| DEL00028726 | chr3 | 85,616,453 | 85,616,618 | 165    | Loss |
| DEL00028732 | chr3 | 85,727,672 | 85,727,791 | 119    | Loss |
| DEL00028733 | chr3 | 85,734,804 | 85,734,879 | 75     | Loss |
| DEL00028734 | chr3 | 85,743,846 | 85,744,038 | 192    | Loss |
| DEL00028735 | chr3 | 85,747,759 | 85,747,833 | 74     | Loss |
| DEL00028749 | chr3 | 85,832,268 | 85,834,964 | 2,696  | Loss |
| DEL00028751 | chr3 | 85,836,141 | 85,836,486 | 345    | Loss |
| DEL00028755 | chr3 | 85,869,800 | 85,870,965 | 1,165  | Loss |
| DEL00028757 | chr3 | 85,873,992 | 85,876,890 | 2,898  | Loss |
| DEL00028762 | chr3 | 85,917,573 | 85,917,709 | 136    | Loss |
| DEL00028763 | chr3 | 85,942,230 | 85,942,404 | 174    | Loss |
| DEL00028778 | chr3 | 86,301,300 | 86,301,545 | 245    | Loss |
| DEL00028781 | chr3 | 86,336,516 | 86,336,911 | 395    | Loss |
| DEL00028783 | chr3 | 86,430,943 | 86,431,112 | 169    | Loss |
| DEL00028784 | chr3 | 86,465,178 | 86,465,750 | 572    | Loss |
| DEL00028785 | chr3 | 86,501,540 | 86,502,723 | 1,183  | Loss |

|             |      |            |            |        |      |
|-------------|------|------------|------------|--------|------|
| DUP00028801 | chr3 | 86,702,545 | 86,713,680 | 11,135 | Gain |
| DEL00028805 | chr3 | 86,796,958 | 86,797,398 | 440    | Loss |
| DEL00028807 | chr3 | 86,814,271 | 86,814,676 | 405    | Loss |
| DEL00028812 | chr3 | 86,824,337 | 86,824,430 | 93     | Loss |
| DEL00028816 | chr3 | 86,890,575 | 86,890,715 | 140    | Loss |
| DEL00028818 | chr3 | 86,930,436 | 86,931,117 | 681    | Loss |
| DEL00028832 | chr3 | 87,231,125 | 87,231,237 | 112    | Loss |
| DEL00028839 | chr3 | 87,307,481 | 87,307,533 | 52     | Loss |
| DEL00028848 | chr3 | 87,470,860 | 87,470,975 | 115    | Loss |
| DEL00028854 | chr3 | 87,593,640 | 87,593,801 | 161    | Loss |
| DEL00028858 | chr3 | 87,703,719 | 87,703,931 | 212    | Loss |
| DEL00028861 | chr3 | 87,719,741 | 87,720,438 | 697    | Loss |
| DEL00028862 | chr3 | 87,726,217 | 87,726,545 | 328    | Loss |
| DEL00028867 | chr3 | 87,800,712 | 87,800,770 | 58     | Loss |
| DEL00028873 | chr3 | 88,009,432 | 88,010,639 | 1,207  | Loss |
| DEL00028879 | chr3 | 88,142,267 | 88,143,238 | 971    | Loss |
| DEL00028887 | chr3 | 88,206,243 | 88,206,529 | 286    | Loss |
| DEL00028889 | chr3 | 88,245,316 | 88,246,452 | 1,136  | Loss |
| DEL00028892 | chr3 | 88,253,042 | 88,253,754 | 712    | Loss |
| DEL00028894 | chr3 | 88,283,729 | 88,284,564 | 835    | Loss |
| DEL00028896 | chr3 | 88,291,271 | 88,291,398 | 127    | Loss |
| DEL00028918 | chr3 | 88,313,428 | 88,327,137 | 13,709 | Loss |
| DEL00028921 | chr3 | 88,333,141 | 88,333,623 | 482    | Loss |
| DEL00028923 | chr3 | 88,377,204 | 88,377,260 | 56     | Loss |
| DEL00028925 | chr3 | 88,426,635 | 88,427,638 | 1,003  | Loss |
| DEL00028927 | chr3 | 88,439,711 | 88,440,033 | 322    | Loss |
| DEL00028928 | chr3 | 88,474,139 | 88,474,261 | 122    | Loss |
| DEL00028929 | chr3 | 88,475,473 | 88,475,563 | 90     | Loss |
| DEL00028933 | chr3 | 88,548,593 | 88,548,674 | 81     | Loss |
| DUP00028945 | chr3 | 88,777,426 | 88,777,932 | 506    | Gain |
| DEL00028949 | chr3 | 88,799,905 | 88,800,961 | 1,056  | Loss |
| DUP00028958 | chr3 | 89,014,236 | 89,014,526 | 290    | Gain |
| DUP00028961 | chr3 | 89,143,632 | 89,155,395 | 11,763 | Gain |
| DEL00028965 | chr3 | 89,287,635 | 89,288,268 | 633    | Loss |
| DEL00028969 | chr3 | 89,314,709 | 89,315,037 | 328    | Loss |
| DEL00028970 | chr3 | 89,321,258 | 89,322,156 | 898    | Loss |
| DEL00028974 | chr3 | 89,388,970 | 89,389,181 | 211    | Loss |
| DEL00028984 | chr3 | 89,457,538 | 89,457,641 | 103    | Loss |
| DEL00028985 | chr3 | 89,504,183 | 89,504,320 | 137    | Loss |
| DEL00028990 | chr3 | 89,561,059 | 89,562,192 | 1,133  | Loss |
| DEL00028997 | chr3 | 89,617,165 | 89,617,879 | 714    | Loss |
| DEL00029001 | chr3 | 89,689,993 | 89,690,558 | 565    | Loss |
| DEL00029012 | chr3 | 89,803,352 | 89,805,914 | 2,562  | Loss |
| DEL00029013 | chr3 | 89,819,219 | 89,819,732 | 513    | Loss |
| DEL00029017 | chr3 | 89,865,296 | 89,867,790 | 2,494  | Loss |
| DEL00029025 | chr3 | 89,921,189 | 89,921,994 | 805    | Loss |
| DEL00029028 | chr3 | 89,962,853 | 89,964,101 | 1,248  | Loss |
| DEL00029029 | chr3 | 89,968,491 | 89,969,851 | 1,360  | Loss |
| DEL00029035 | chr3 | 90,013,665 | 90,013,873 | 208    | Loss |

|             |      |            |            |        |      |
|-------------|------|------------|------------|--------|------|
| DEL00029036 | chr3 | 90,023,530 | 90,023,624 | 94     | Loss |
| DEL00029039 | chr3 | 90,082,636 | 90,084,681 | 2,045  | Loss |
| DEL00029046 | chr3 | 90,130,784 | 90,132,121 | 1,337  | Loss |
| DEL00029047 | chr3 | 90,136,840 | 90,137,047 | 207    | Loss |
| DUP00029050 | chr3 | 90,191,892 | 90,206,885 | 14,993 | Gain |
| DEL00029055 | chr3 | 90,260,561 | 90,260,714 | 153    | Loss |
| DEL00029062 | chr3 | 90,327,634 | 90,328,181 | 547    | Loss |
| DEL00029064 | chr3 | 90,328,455 | 90,328,577 | 122    | Loss |
| DEL00029065 | chr3 | 90,334,086 | 90,334,320 | 234    | Loss |
| DEL00029067 | chr3 | 90,363,531 | 90,363,896 | 365    | Loss |
| DEL00029068 | chr3 | 90,366,243 | 90,366,315 | 72     | Loss |
| DEL00029069 | chr3 | 90,371,067 | 90,371,232 | 165    | Loss |
| DEL00029070 | chr3 | 90,373,050 | 90,373,348 | 298    | Loss |
| DEL00029085 | chr3 | 90,559,003 | 90,559,139 | 136    | Loss |
| DEL00029087 | chr3 | 90,590,781 | 90,590,930 | 149    | Loss |
| DEL00029095 | chr3 | 90,719,692 | 90,720,213 | 521    | Loss |
| DEL00029097 | chr3 | 90,744,194 | 90,744,447 | 253    | Loss |
| DEL00029101 | chr3 | 90,849,574 | 90,849,646 | 72     | Loss |
| DEL00029103 | chr3 | 90,863,618 | 90,863,843 | 225    | Loss |
| DEL00029110 | chr3 | 90,945,157 | 90,945,231 | 74     | Loss |
| DEL00029113 | chr3 | 90,971,665 | 90,972,061 | 396    | Loss |
| DEL00029119 | chr3 | 91,048,266 | 91,048,323 | 57     | Loss |
| DUP00029139 | chr3 | 91,330,659 | 91,330,853 | 194    | Gain |
| DEL00029140 | chr3 | 91,340,524 | 91,340,621 | 97     | Loss |
| DEL00029142 | chr3 | 91,364,609 | 91,364,673 | 64     | Loss |
| DEL00029145 | chr3 | 91,407,610 | 91,407,712 | 102    | Loss |
| DEL00029161 | chr3 | 91,645,091 | 91,645,172 | 81     | Loss |
| DEL00029165 | chr3 | 91,656,551 | 91,656,611 | 60     | Loss |
| DEL00029171 | chr3 | 91,761,412 | 91,761,469 | 57     | Loss |
| DEL00029191 | chr3 | 91,966,354 | 91,966,452 | 98     | Loss |
| DEL00029193 | chr3 | 91,981,477 | 91,981,759 | 282    | Loss |
| DEL00029200 | chr3 | 92,060,418 | 92,060,872 | 454    | Loss |
| DEL00029201 | chr3 | 92,069,199 | 92,070,121 | 922    | Loss |
| DEL00029204 | chr3 | 92,085,376 | 92,086,050 | 674    | Loss |
| DEL00029205 | chr3 | 92,089,099 | 92,089,155 | 56     | Loss |
| DEL00029206 | chr3 | 92,093,297 | 92,093,374 | 77     | Loss |
| DEL00029213 | chr3 | 92,143,375 | 92,145,296 | 1,921  | Loss |
| DEL00029214 | chr3 | 92,165,571 | 92,167,226 | 1,655  | Loss |
| DEL00029216 | chr3 | 92,189,847 | 92,193,988 | 4,141  | Loss |
| DEL00029217 | chr3 | 92,196,283 | 92,220,006 | 23,723 | Loss |
| DEL00029221 | chr3 | 92,220,881 | 92,222,459 | 1,578  | Loss |
| DEL00029222 | chr3 | 92,253,416 | 92,254,656 | 1,240  | Loss |
| DEL00029225 | chr3 | 92,307,043 | 92,307,234 | 191    | Loss |
| DEL00029226 | chr3 | 92,322,934 | 92,322,990 | 56     | Loss |
| DEL00029232 | chr3 | 92,451,333 | 92,451,831 | 498    | Loss |
| DEL00029235 | chr3 | 92,458,449 | 92,458,863 | 414    | Loss |
| DEL00029237 | chr3 | 92,492,253 | 92,493,052 | 799    | Loss |
| DEL00029241 | chr3 | 92,534,996 | 92,535,152 | 156    | Loss |
| DEL00029244 | chr3 | 92,607,147 | 92,607,389 | 242    | Loss |

|             |      |            |            |       |      |
|-------------|------|------------|------------|-------|------|
| DEL00029246 | chr3 | 92,643,419 | 92,644,530 | 1,111 | Loss |
| DEL00029249 | chr3 | 92,698,866 | 92,698,922 | 56    | Loss |
| DEL00029254 | chr3 | 92,763,402 | 92,763,692 | 290   | Loss |
| DEL00029255 | chr3 | 92,801,587 | 92,801,653 | 66    | Loss |
| DEL00029261 | chr3 | 92,850,013 | 92,850,067 | 54    | Loss |
| DEL00029267 | chr3 | 93,025,591 | 93,025,841 | 250   | Loss |
| DEL00029273 | chr3 | 93,072,792 | 93,073,679 | 887   | Loss |
| DEL00029274 | chr3 | 93,075,795 | 93,076,031 | 236   | Loss |
| DEL00029276 | chr3 | 93,118,598 | 93,118,659 | 61    | Loss |
| DEL00029282 | chr3 | 93,234,218 | 93,234,844 | 626   | Loss |
| DEL00029285 | chr3 | 93,431,008 | 93,431,061 | 53    | Loss |
| DEL00029286 | chr3 | 93,481,366 | 93,481,424 | 58    | Loss |
| DEL00029291 | chr3 | 93,536,410 | 93,537,409 | 999   | Loss |
| DEL00029293 | chr3 | 93,577,884 | 93,578,261 | 377   | Loss |
| DEL00029299 | chr3 | 93,617,786 | 93,617,937 | 151   | Loss |
| DEL00029301 | chr3 | 93,635,646 | 93,635,708 | 62    | Loss |
| DEL00029304 | chr3 | 93,650,372 | 93,650,813 | 441   | Loss |
| DEL00029313 | chr3 | 93,723,762 | 93,726,084 | 2,322 | Loss |
| DEL00029323 | chr3 | 93,833,621 | 93,835,089 | 1,468 | Loss |
| DEL00029325 | chr3 | 93,854,868 | 93,854,938 | 70    | Loss |
| DEL00029334 | chr3 | 93,942,676 | 93,945,082 | 2,406 | Loss |
| DEL00029340 | chr3 | 93,968,894 | 93,970,852 | 1,958 | Loss |
| DEL00029347 | chr3 | 94,052,122 | 94,052,187 | 65    | Loss |
| DEL00029348 | chr3 | 94,080,097 | 94,080,260 | 163   | Loss |
| DEL00029350 | chr3 | 94,133,879 | 94,133,930 | 51    | Loss |
| DEL00029356 | chr3 | 94,147,811 | 94,147,928 | 117   | Loss |
| DEL00029360 | chr3 | 94,180,919 | 94,181,154 | 235   | Loss |
| DEL00029362 | chr3 | 94,194,696 | 94,195,631 | 935   | Loss |
| DEL00029365 | chr3 | 94,242,504 | 94,243,483 | 979   | Loss |
| DEL00029370 | chr3 | 94,366,015 | 94,366,118 | 103   | Loss |
| DEL00029379 | chr3 | 94,551,801 | 94,552,415 | 614   | Loss |
| DEL00029382 | chr3 | 94,607,886 | 94,607,938 | 52    | Loss |
| DEL00029390 | chr3 | 94,621,147 | 94,621,219 | 72    | Loss |
| DEL00029394 | chr3 | 94,642,543 | 94,642,594 | 51    | Loss |
| DEL00029416 | chr3 | 94,974,209 | 94,974,282 | 73    | Loss |
| DEL00029417 | chr3 | 94,993,900 | 94,993,989 | 89    | Loss |
| DEL00029418 | chr3 | 94,996,713 | 94,997,533 | 820   | Loss |
| DEL00029426 | chr3 | 95,096,980 | 95,097,090 | 110   | Loss |
| DEL00029429 | chr3 | 95,130,314 | 95,130,491 | 177   | Loss |
| DEL00029435 | chr3 | 95,213,324 | 95,214,049 | 725   | Loss |
| DEL00029438 | chr3 | 95,286,878 | 95,286,933 | 55    | Loss |
| DEL00029439 | chr3 | 95,304,235 | 95,304,691 | 456   | Loss |
| DEL00029445 | chr3 | 95,459,098 | 95,459,203 | 105   | Loss |
| DEL00029450 | chr3 | 95,642,581 | 95,642,639 | 58    | Loss |
| DEL00029455 | chr3 | 95,736,281 | 95,736,690 | 409   | Loss |
| DEL00029457 | chr3 | 95,752,959 | 95,753,491 | 532   | Loss |
| DEL00029466 | chr3 | 95,776,731 | 95,776,787 | 56    | Loss |
| DEL00029467 | chr3 | 95,801,723 | 95,801,779 | 56    | Loss |
| DEL00029473 | chr3 | 95,859,675 | 95,859,971 | 296   | Loss |

|             |      |            |            |        |      |
|-------------|------|------------|------------|--------|------|
| DEL00029474 | chr3 | 95,897,423 | 95,898,208 | 785    | Loss |
| DEL00029478 | chr3 | 95,950,525 | 95,950,598 | 73     | Loss |
| DEL00029480 | chr3 | 95,958,001 | 95,959,139 | 1,138  | Loss |
| DEL00029483 | chr3 | 95,992,706 | 95,992,848 | 142    | Loss |
| DEL00029488 | chr3 | 96,111,891 | 96,112,104 | 213    | Loss |
| DEL00029494 | chr3 | 96,219,018 | 96,219,459 | 441    | Loss |
| DEL00029499 | chr3 | 96,331,692 | 96,331,814 | 122    | Loss |
| DEL00029505 | chr3 | 96,371,099 | 96,371,227 | 128    | Loss |
| DEL00029511 | chr3 | 96,417,370 | 96,417,426 | 56     | Loss |
| DEL00029512 | chr3 | 96,471,996 | 96,472,070 | 74     | Loss |
| DEL00029513 | chr3 | 96,476,854 | 96,476,906 | 52     | Loss |
| DEL00029517 | chr3 | 96,504,864 | 96,505,217 | 353    | Loss |
| DEL00029520 | chr3 | 96,537,723 | 96,537,898 | 175    | Loss |
| DEL00029524 | chr3 | 96,576,927 | 96,577,300 | 373    | Loss |
| DEL00029530 | chr3 | 96,655,332 | 96,655,846 | 514    | Loss |
| DEL00029532 | chr3 | 96,675,744 | 96,676,254 | 510    | Loss |
| DEL00029536 | chr3 | 96,698,061 | 96,702,287 | 4,226  | Loss |
| DUP00029538 | chr3 | 96,753,127 | 96,753,280 | 153    | Gain |
| DEL00029542 | chr3 | 96,819,240 | 96,819,703 | 463    | Loss |
| DEL00029545 | chr3 | 96,863,741 | 96,863,960 | 219    | Loss |
| DEL00029558 | chr3 | 96,989,141 | 96,991,844 | 2,703  | Loss |
| DEL00029559 | chr3 | 96,996,540 | 96,997,037 | 497    | Loss |
| DUP00029560 | chr3 | 97,019,670 | 97,019,733 | 63     | Gain |
| DEL00029561 | chr3 | 97,040,957 | 97,041,036 | 79     | Loss |
| DEL00029564 | chr3 | 97,117,906 | 97,118,031 | 125    | Loss |
| DEL00029569 | chr3 | 97,159,798 | 97,159,936 | 138    | Loss |
| DEL00029577 | chr3 | 97,289,449 | 97,289,561 | 112    | Loss |
| DEL00029583 | chr3 | 97,352,480 | 97,353,293 | 813    | Loss |
| DEL00029587 | chr3 | 97,474,942 | 97,475,017 | 75     | Loss |
| DEL00029594 | chr3 | 97,599,287 | 97,599,551 | 264    | Loss |
| DEL00029597 | chr3 | 97,628,944 | 97,630,714 | 1,770  | Loss |
| DEL00029604 | chr3 | 97,686,753 | 97,686,804 | 51     | Loss |
| DEL00029612 | chr3 | 97,885,252 | 97,885,365 | 113    | Loss |
| DEL00029613 | chr3 | 97,913,530 | 97,913,582 | 52     | Loss |
| DEL00029614 | chr3 | 97,914,222 | 97,915,142 | 920    | Loss |
| DEL00029615 | chr3 | 97,933,436 | 97,934,370 | 934    | Loss |
| DUP00029621 | chr3 | 97,995,982 | 98,008,835 | 12,853 | Gain |
| DEL00029634 | chr3 | 98,168,077 | 98,168,409 | 332    | Loss |
| DEL00029635 | chr3 | 98,181,353 | 98,182,152 | 799    | Loss |
| DEL00029638 | chr3 | 98,290,930 | 98,291,073 | 143    | Loss |
| DEL00029646 | chr3 | 98,378,589 | 98,378,812 | 223    | Loss |
| DEL00029653 | chr3 | 98,480,553 | 98,481,617 | 1,064  | Loss |
| DEL00029660 | chr3 | 98,662,261 | 98,662,557 | 296    | Loss |
| DEL00029663 | chr3 | 98,672,163 | 98,672,609 | 446    | Loss |
| DEL00029664 | chr3 | 98,697,385 | 98,697,507 | 122    | Loss |
| DEL00029674 | chr3 | 98,785,288 | 98,785,365 | 77     | Loss |
| DEL00029676 | chr3 | 98,790,231 | 98,790,315 | 84     | Loss |
| DEL00029677 | chr3 | 98,809,879 | 98,810,059 | 180    | Loss |
| DEL00029686 | chr3 | 98,904,988 | 98,906,692 | 1,704  | Loss |



|             |      |             |             |       |      |
|-------------|------|-------------|-------------|-------|------|
| DEL00029688 | chr3 | 98,935,857  | 98,935,997  | 140   | Loss |
| DEL00029691 | chr3 | 99,023,594  | 99,023,653  | 59    | Loss |
| DEL00029695 | chr3 | 99,065,857  | 99,066,863  | 1,006 | Loss |
| DEL00029697 | chr3 | 99,131,880  | 99,132,227  | 347   | Loss |
| DEL00029699 | chr3 | 99,151,717  | 99,152,231  | 514   | Loss |
| DEL00029702 | chr3 | 99,173,903  | 99,173,981  | 78    | Loss |
| DEL00029704 | chr3 | 99,188,734  | 99,189,492  | 758   | Loss |
| DEL00029710 | chr3 | 99,247,628  | 99,247,722  | 94    | Loss |
| DEL00029713 | chr3 | 99,336,503  | 99,339,109  | 2,606 | Loss |
| DEL00029714 | chr3 | 99,351,343  | 99,351,459  | 116   | Loss |
| DEL00029722 | chr3 | 99,476,611  | 99,476,694  | 83    | Loss |
| DEL00029737 | chr3 | 99,685,758  | 99,686,385  | 627   | Loss |
| DEL00029741 | chr3 | 99,759,396  | 99,759,483  | 87    | Loss |
| DEL00029743 | chr3 | 99,782,979  | 99,790,758  | 7,779 | Loss |
| DEL00029761 | chr3 | 100,006,635 | 100,007,480 | 845   | Loss |
| DEL00029771 | chr3 | 100,125,358 | 100,126,036 | 678   | Loss |
| DEL00029773 | chr3 | 100,141,312 | 100,141,419 | 107   | Loss |
| DEL00029775 | chr3 | 100,173,816 | 100,174,402 | 586   | Loss |
| DEL00029785 | chr3 | 100,305,425 | 100,305,535 | 110   | Loss |
| DEL00029788 | chr3 | 100,341,771 | 100,342,339 | 568   | Loss |
| DEL00029789 | chr3 | 100,354,926 | 100,355,683 | 757   | Loss |
| DEL00029790 | chr3 | 100,363,627 | 100,364,236 | 609   | Loss |
| DEL00029793 | chr3 | 100,375,326 | 100,376,169 | 843   | Loss |
| DEL00029796 | chr3 | 100,394,476 | 100,394,913 | 437   | Loss |
| DEL00029798 | chr3 | 100,404,374 | 100,405,495 | 1,121 | Loss |
| DEL00029802 | chr3 | 100,440,392 | 100,440,972 | 580   | Loss |
| DEL00029812 | chr3 | 100,547,527 | 100,548,057 | 530   | Loss |
| DEL00029838 | chr3 | 100,883,813 | 100,884,226 | 413   | Loss |
| DEL00029842 | chr3 | 100,944,969 | 100,945,523 | 554   | Loss |
| DEL00029849 | chr3 | 101,011,876 | 101,011,975 | 99    | Loss |
| DEL00029852 | chr3 | 101,084,332 | 101,084,385 | 53    | Loss |
| DEL00029861 | chr3 | 101,103,488 | 101,103,911 | 423   | Loss |
| DEL00029862 | chr3 | 101,104,693 | 101,105,011 | 318   | Loss |
| DEL00029865 | chr3 | 101,129,496 | 101,129,550 | 54    | Loss |
| DEL00029869 | chr3 | 101,157,521 | 101,157,640 | 119   | Loss |
| DEL00029871 | chr3 | 101,193,359 | 101,193,894 | 535   | Loss |
| DEL00029874 | chr3 | 101,211,638 | 101,211,898 | 260   | Loss |
| DEL00029884 | chr3 | 101,364,577 | 101,365,624 | 1,047 | Loss |
| DEL00029887 | chr3 | 101,390,071 | 101,390,122 | 51    | Loss |
| DEL00029904 | chr3 | 101,715,491 | 101,715,594 | 103   | Loss |
| DEL00029907 | chr3 | 101,742,031 | 101,742,587 | 556   | Loss |
| DEL00029910 | chr3 | 101,819,810 | 101,820,364 | 554   | Loss |
| DEL00029923 | chr3 | 102,073,695 | 102,073,816 | 121   | Loss |
| DEL00029924 | chr3 | 102,085,158 | 102,085,418 | 260   | Loss |
| DEL00029926 | chr3 | 102,154,795 | 102,155,145 | 350   | Loss |
| DEL00029929 | chr3 | 102,211,842 | 102,212,279 | 437   | Loss |
| DEL00029941 | chr3 | 102,500,197 | 102,500,503 | 306   | Loss |
| DEL00029944 | chr3 | 102,540,311 | 102,540,812 | 501   | Loss |
| DEL00029946 | chr3 | 102,548,985 | 102,549,087 | 102   | Loss |

|             |      |             |             |        |       |
|-------------|------|-------------|-------------|--------|-------|
| DEL00029961 | chr3 | 102,748,884 | 102,749,082 | 198    | Loss  |
| DEL00029964 | chr3 | 102,852,020 | 102,852,189 | 169    | Loss  |
| DEL00029966 | chr3 | 102,906,593 | 102,906,704 | 111    | Loss  |
| DEL00029975 | chr3 | 103,009,333 | 103,010,214 | 881    | Loss  |
| DEL00029976 | chr3 | 103,018,260 | 103,018,450 | 190    | Loss  |
| DEL00029978 | chr3 | 103,022,279 | 103,022,608 | 329    | Loss  |
| DEL00029979 | chr3 | 103,030,140 | 103,031,198 | 1,058  | Loss  |
| DEL00029986 | chr3 | 103,151,798 | 103,151,932 | 134    | Loss  |
| DEL00029991 | chr3 | 103,268,577 | 103,269,324 | 747    | Loss  |
| DEL00029992 | chr3 | 103,367,441 | 103,368,136 | 695    | Loss  |
| DEL00029994 | chr3 | 103,387,339 | 103,387,868 | 529    | Loss  |
| DEL00029996 | chr3 | 103,388,220 | 103,388,282 | 62     | Loss  |
| DEL00029997 | chr3 | 103,388,953 | 103,389,430 | 477    | Loss  |
| DEL00030007 | chr3 | 103,746,314 | 103,746,368 | 54     | Loss  |
| DEL00030008 | chr3 | 103,867,519 | 103,867,737 | 218    | Loss  |
| DEL00030012 | chr3 | 103,934,694 | 103,934,893 | 199    | Loss  |
| DEL00030014 | chr3 | 104,012,827 | 104,012,954 | 127    | Loss  |
| DEL00030015 | chr3 | 104,026,870 | 104,026,992 | 122    | Loss  |
| DEL00030016 | chr3 | 104,047,561 | 104,047,613 | 52     | Loss  |
| DEL00030017 | chr3 | 104,062,779 | 104,062,834 | 55     | Loss  |
| DEL00030021 | chr3 | 104,127,916 | 104,128,350 | 434    | Loss  |
| DEL00030031 | chr3 | 104,142,381 | 104,142,567 | 186    | Loss  |
| DEL00030051 | chr3 | 104,301,324 | 104,301,411 | 87     | Loss  |
| DEL00030052 | chr3 | 104,309,755 | 104,309,840 | 85     | Loss  |
| DEL00030059 | chr3 | 104,414,167 | 104,414,228 | 61     | Loss  |
| DEL00030094 | chr3 | 104,505,324 | 104,505,723 | 399    | Loss  |
| DEL00030116 | chr3 | 104,544,737 | 104,545,083 | 346    | Loss  |
| DUP00030120 | chr3 | 104,549,659 | 104,549,807 | 148    | Gain  |
| DEL00030121 | chr3 | 104,550,158 | 104,550,774 | 616    | Loss  |
| DEL00030124 | chr3 | 104,566,382 | 104,566,433 | 51     | Loss  |
| DEL00030132 | chr3 | 104,699,361 | 104,699,436 | 75     | Loss  |
| DEL00030146 | chr3 | 104,807,660 | 104,807,789 | 129    | Loss  |
| DEL00030147 | chr3 | 104,823,678 | 104,824,009 | 331    | Loss  |
| DEL00030158 | chr3 | 104,899,239 | 104,899,299 | 60     | Loss  |
| DEL00030160 | chr3 | 104,927,895 | 104,927,969 | 74     | Loss  |
| DEL00030167 | chr3 | 104,951,888 | 104,989,437 | 37,549 | Mixed |
| DEL00030180 | chr3 | 105,065,337 | 105,065,423 | 86     | Loss  |
| DEL00030188 | chr3 | 105,214,428 | 105,214,493 | 65     | Loss  |
| DEL00030196 | chr3 | 105,307,049 | 105,307,138 | 89     | Loss  |
| DEL00030211 | chr3 | 105,549,196 | 105,549,266 | 70     | Loss  |
| DEL00030230 | chr3 | 105,590,666 | 105,591,308 | 642    | Loss  |
| DEL00030239 | chr3 | 105,711,317 | 105,711,846 | 529    | Loss  |
| DEL00030242 | chr3 | 105,732,914 | 105,733,230 | 316    | Loss  |
| DEL00030249 | chr3 | 105,801,464 | 105,801,650 | 186    | Loss  |
| DEL00030258 | chr3 | 105,918,872 | 105,919,912 | 1,040  | Loss  |
| DEL00030259 | chr3 | 105,934,215 | 105,935,115 | 900    | Loss  |
| DEL00030261 | chr3 | 105,967,941 | 105,968,521 | 580    | Loss  |
| DEL00030274 | chr3 | 106,164,320 | 106,164,455 | 135    | Loss  |
| DEL00030277 | chr3 | 106,276,023 | 106,276,172 | 149    | Loss  |

|             |      |             |             |        |       |
|-------------|------|-------------|-------------|--------|-------|
| DEL00030278 | chr3 | 106,321,255 | 106,321,391 | 136    | Loss  |
| DEL00030282 | chr3 | 106,396,841 | 106,396,915 | 74     | Loss  |
| DEL00030290 | chr3 | 106,450,629 | 106,450,725 | 96     | Loss  |
| DUP00030291 | chr3 | 106,486,742 | 106,503,545 | 16,803 | Mixed |
| DEL00030296 | chr3 | 106,577,009 | 106,577,102 | 93     | Loss  |
| DEL00030303 | chr3 | 106,643,151 | 106,643,487 | 336    | Loss  |
| DEL00030322 | chr3 | 106,868,981 | 106,869,320 | 339    | Loss  |
| DEL00030325 | chr3 | 106,898,841 | 106,898,929 | 88     | Loss  |
| DEL00030327 | chr3 | 106,962,192 | 106,962,451 | 259    | Loss  |
| DEL00030343 | chr3 | 107,052,255 | 107,052,324 | 69     | Loss  |
| DUP00030346 | chr3 | 107,056,890 | 107,059,139 | 2,249  | Gain  |
| DEL00030352 | chr3 | 107,096,800 | 107,096,896 | 96     | Loss  |
| DEL00030362 | chr3 | 107,154,637 | 107,154,787 | 150    | Loss  |
| DEL00030377 | chr3 | 107,391,184 | 107,391,927 | 743    | Loss  |
| DEL00030381 | chr3 | 107,407,163 | 107,407,251 | 88     | Loss  |
| DEL00030382 | chr3 | 107,415,291 | 107,415,561 | 270    | Loss  |
| DEL00030384 | chr3 | 107,419,019 | 107,419,150 | 131    | Loss  |
| DEL00030393 | chr3 | 107,547,782 | 107,548,656 | 874    | Loss  |
| DEL00030395 | chr3 | 107,582,339 | 107,582,564 | 225    | Loss  |
| DEL00030396 | chr3 | 107,593,075 | 107,593,148 | 73     | Loss  |
| DEL00030405 | chr3 | 107,645,012 | 107,645,222 | 210    | Loss  |
| DEL00030406 | chr3 | 107,659,836 | 107,659,924 | 88     | Loss  |
| DEL00030410 | chr3 | 107,749,894 | 107,750,459 | 565    | Loss  |
| DEL00030411 | chr3 | 107,751,760 | 107,752,512 | 752    | Loss  |
| DEL00030418 | chr3 | 107,861,841 | 107,862,059 | 218    | Loss  |
| DEL00030419 | chr3 | 107,881,998 | 107,882,072 | 74     | Loss  |
| DEL00030421 | chr3 | 107,928,045 | 107,928,205 | 160    | Loss  |
| DEL00030424 | chr3 | 107,938,040 | 107,938,173 | 133    | Loss  |
| DEL00030425 | chr3 | 107,992,177 | 107,992,627 | 450    | Loss  |
| DEL00030430 | chr3 | 108,044,099 | 108,044,166 | 67     | Loss  |
| DEL00030439 | chr3 | 108,154,883 | 108,156,109 | 1,226  | Loss  |
| DEL00030440 | chr3 | 108,157,930 | 108,158,088 | 158    | Loss  |
| DEL00030451 | chr3 | 108,397,260 | 108,397,635 | 375    | Loss  |
| DEL00030462 | chr3 | 108,550,920 | 108,551,744 | 824    | Loss  |
| DEL00030470 | chr3 | 108,600,441 | 108,600,971 | 530    | Loss  |
| DEL00030473 | chr3 | 108,617,985 | 108,618,496 | 511    | Loss  |
| DEL00030482 | chr3 | 108,693,843 | 108,694,746 | 903    | Loss  |
| DEL00030487 | chr3 | 108,737,022 | 108,737,418 | 396    | Loss  |
| DEL00030502 | chr3 | 108,867,158 | 108,867,403 | 245    | Loss  |
| DEL00030510 | chr3 | 108,891,779 | 108,891,860 | 81     | Loss  |
| DEL00030513 | chr3 | 108,899,825 | 108,900,107 | 282    | Loss  |
| DEL00030530 | chr3 | 109,088,896 | 109,089,082 | 186    | Loss  |
| DEL00030531 | chr3 | 109,099,946 | 109,100,104 | 158    | Loss  |
| DEL00030534 | chr3 | 109,138,140 | 109,138,210 | 70     | Loss  |
| DEL00030538 | chr3 | 109,180,666 | 109,181,561 | 895    | Loss  |
| DEL00030549 | chr3 | 109,313,952 | 109,314,116 | 164    | Loss  |
| DEL00030561 | chr3 | 109,392,357 | 109,392,428 | 71     | Loss  |
| DEL00030570 | chr3 | 109,483,192 | 109,483,797 | 605    | Loss  |
| DEL00030575 | chr3 | 109,511,071 | 109,511,286 | 215    | Loss  |

|             |      |             |             |       |      |
|-------------|------|-------------|-------------|-------|------|
| DEL00030602 | chr3 | 109,668,980 | 109,669,555 | 575   | Loss |
| DEL00030603 | chr3 | 109,671,251 | 109,671,321 | 70    | Loss |
| DEL00030706 | chr3 | 109,850,385 | 109,851,199 | 814   | Loss |
| DEL00030728 | chr3 | 109,939,557 | 109,939,986 | 429   | Loss |
| DEL00030735 | chr3 | 109,960,754 | 109,961,297 | 543   | Loss |
| DEL00030738 | chr3 | 109,963,196 | 109,963,734 | 538   | Loss |
| DEL00030786 | chr3 | 110,165,957 | 110,166,492 | 535   | Loss |
| DEL00030789 | chr3 | 110,184,373 | 110,185,175 | 802   | Loss |
| DEL00030795 | chr3 | 110,258,172 | 110,258,609 | 437   | Loss |
| DEL00030798 | chr3 | 110,280,083 | 110,280,502 | 419   | Loss |
| DEL00030802 | chr3 | 110,319,321 | 110,319,997 | 676   | Loss |
| DEL00030810 | chr3 | 110,407,423 | 110,407,593 | 170   | Loss |
| DEL00030818 | chr3 | 110,526,540 | 110,527,982 | 1,442 | Loss |
| DEL00030820 | chr3 | 110,536,069 | 110,536,132 | 63    | Loss |
| DEL00030857 | chr4 | 27,230      | 27,288      | 58    | Loss |
| DEL00030867 | chr4 | 307,762     | 308,316     | 554   | Loss |
| DEL00030877 | chr4 | 883,775     | 884,140     | 365   | Loss |
| DEL00030881 | chr4 | 1,044,679   | 1,044,736   | 57    | Loss |
| DEL00030888 | chr4 | 1,352,440   | 1,352,511   | 71    | Loss |
| DEL00030919 | chr4 | 2,132,620   | 2,132,685   | 65    | Loss |
| DEL00030920 | chr4 | 2,133,060   | 2,133,120   | 60    | Loss |
| DEL00030923 | chr4 | 2,191,907   | 2,192,355   | 448   | Loss |
| DEL00030924 | chr4 | 2,199,705   | 2,200,244   | 539   | Loss |
| DEL00030925 | chr4 | 2,226,678   | 2,226,763   | 85    | Loss |
| DUP00030932 | chr4 | 2,423,127   | 2,423,417   | 290   | Gain |
| DEL00030936 | chr4 | 2,548,785   | 2,548,837   | 52    | Loss |
| DEL00030938 | chr4 | 2,579,911   | 2,580,209   | 298   | Loss |
| DEL00030941 | chr4 | 2,607,781   | 2,607,945   | 164   | Loss |
| DEL00030947 | chr4 | 2,710,664   | 2,710,750   | 86    | Loss |
| DEL00030956 | chr4 | 2,851,327   | 2,851,384   | 57    | Loss |
| DEL00030958 | chr4 | 2,877,331   | 2,877,382   | 51    | Loss |
| DEL00030963 | chr4 | 2,946,644   | 2,946,736   | 92    | Loss |
| DEL00030964 | chr4 | 2,953,788   | 2,953,881   | 93    | Loss |
| DEL00030969 | chr4 | 3,015,976   | 3,016,209   | 233   | Loss |
| DEL00030970 | chr4 | 3,068,250   | 3,068,580   | 330   | Loss |
| DEL00030974 | chr4 | 3,171,242   | 3,171,786   | 544   | Loss |
| DEL00030988 | chr4 | 3,552,795   | 3,552,872   | 77    | Loss |
| DEL00030990 | chr4 | 3,573,056   | 3,573,195   | 139   | Loss |
| DEL00030998 | chr4 | 3,818,603   | 3,820,559   | 1,956 | Loss |
| DEL00031003 | chr4 | 3,927,439   | 3,927,529   | 90    | Loss |
| DEL00031005 | chr4 | 3,939,373   | 3,939,430   | 57    | Loss |
| DEL00031009 | chr4 | 4,101,801   | 4,102,030   | 229   | Loss |
| DEL00031018 | chr4 | 4,595,065   | 4,595,151   | 86    | Loss |
| DEL00031026 | chr4 | 5,035,359   | 5,035,415   | 56    | Loss |
| DEL00031029 | chr4 | 5,068,110   | 5,068,170   | 60    | Loss |
| DEL00031033 | chr4 | 5,191,528   | 5,191,608   | 80    | Loss |
| DEL00031035 | chr4 | 5,321,021   | 5,321,252   | 231   | Loss |
| DUP00031037 | chr4 | 5,380,894   | 5,381,016   | 122   | Gain |
| DEL00031038 | chr4 | 5,397,502   | 5,398,055   | 553   | Loss |

|             |      |           |           |       |      |
|-------------|------|-----------|-----------|-------|------|
| DEL00031039 | chr4 | 5,398,839 | 5,398,953 | 114   | Loss |
| DEL00031045 | chr4 | 5,570,442 | 5,572,041 | 1,599 | Loss |
| DEL00031048 | chr4 | 5,682,550 | 5,682,725 | 175   | Loss |
| DEL00031050 | chr4 | 5,763,183 | 5,763,678 | 495   | Loss |
| DEL00031052 | chr4 | 5,801,179 | 5,801,552 | 373   | Loss |
| DEL00031059 | chr4 | 5,835,617 | 5,835,728 | 111   | Loss |
| DEL00031065 | chr4 | 5,973,462 | 5,973,686 | 224   | Loss |
| DUP00031070 | chr4 | 6,106,005 | 6,106,183 | 178   | Gain |
| DEL00031074 | chr4 | 6,200,758 | 6,201,314 | 556   | Loss |
| DEL00031075 | chr4 | 6,211,996 | 6,212,120 | 124   | Loss |
| DUP00031076 | chr4 | 6,246,713 | 6,255,364 | 8,651 | Gain |
| DEL00031079 | chr4 | 6,264,485 | 6,264,548 | 63    | Loss |
| DEL00031080 | chr4 | 6,269,037 | 6,269,134 | 97    | Loss |
| DEL00031083 | chr4 | 6,412,415 | 6,413,132 | 717   | Loss |
| DEL00031084 | chr4 | 6,434,124 | 6,434,659 | 535   | Loss |
| DEL00031092 | chr4 | 6,457,362 | 6,457,661 | 299   | Loss |
| DEL00031093 | chr4 | 6,484,862 | 6,487,944 | 3,082 | Loss |
| DEL00031095 | chr4 | 6,506,534 | 6,506,628 | 94    | Loss |
| DEL00031102 | chr4 | 6,916,788 | 6,916,887 | 99    | Loss |
| DEL00031103 | chr4 | 6,923,279 | 6,923,412 | 133   | Loss |
| DEL00031107 | chr4 | 6,970,887 | 6,970,946 | 59    | Loss |
| DEL00031123 | chr4 | 7,117,936 | 7,118,059 | 123   | Loss |
| DEL00031125 | chr4 | 7,146,327 | 7,147,149 | 822   | Loss |
| DEL00031134 | chr4 | 7,229,392 | 7,229,460 | 68    | Loss |
| DEL00031137 | chr4 | 7,287,326 | 7,287,470 | 144   | Loss |
| DEL00031140 | chr4 | 7,324,768 | 7,324,823 | 55    | Loss |
| DEL00031142 | chr4 | 7,404,433 | 7,404,999 | 566   | Loss |
| DEL00031143 | chr4 | 7,434,631 | 7,434,880 | 249   | Loss |
| DEL00031150 | chr4 | 7,575,128 | 7,576,036 | 908   | Loss |
| DEL00031157 | chr4 | 7,607,401 | 7,607,787 | 386   | Loss |
| DEL00031160 | chr4 | 7,628,508 | 7,629,082 | 574   | Loss |
| DEL00031161 | chr4 | 7,679,391 | 7,679,577 | 186   | Loss |
| DEL00031164 | chr4 | 7,712,111 | 7,712,421 | 310   | Loss |
| DEL00031165 | chr4 | 7,722,729 | 7,724,502 | 1,773 | Loss |
| DEL00031168 | chr4 | 7,747,512 | 7,747,568 | 56    | Loss |
| DEL00031176 | chr4 | 7,810,713 | 7,810,935 | 222   | Loss |
| DEL00031177 | chr4 | 7,818,747 | 7,818,881 | 134   | Loss |
| DUP00031178 | chr4 | 7,820,402 | 7,828,503 | 8,101 | Gain |
| DEL00031179 | chr4 | 7,829,639 | 7,829,931 | 292   | Loss |
| DEL00031180 | chr4 | 7,836,177 | 7,836,380 | 203   | Loss |
| DEL00031184 | chr4 | 7,879,643 | 7,879,788 | 145   | Loss |
| DEL00031186 | chr4 | 7,889,517 | 7,890,344 | 827   | Loss |
| DEL00031191 | chr4 | 7,943,382 | 7,943,991 | 609   | Loss |
| DEL00031192 | chr4 | 7,945,846 | 7,946,122 | 276   | Loss |
| DEL00031194 | chr4 | 7,950,315 | 7,950,984 | 669   | Loss |
| DEL00031196 | chr4 | 7,974,130 | 7,974,243 | 113   | Loss |
| DUP00031200 | chr4 | 7,998,277 | 7,998,443 | 166   | Gain |
| DEL00031203 | chr4 | 8,042,916 | 8,044,133 | 1,217 | Loss |
| DEL00031206 | chr4 | 8,124,576 | 8,125,432 | 856   | Loss |

|             |      |            |            |       |      |
|-------------|------|------------|------------|-------|------|
| DEL00031207 | chr4 | 8,163,280  | 8,163,336  | 56    | Loss |
| DEL00031211 | chr4 | 8,216,244  | 8,216,306  | 62    | Loss |
| DEL00031213 | chr4 | 8,282,430  | 8,283,328  | 898   | Loss |
| DEL00031214 | chr4 | 8,288,777  | 8,288,846  | 69    | Loss |
| DEL00031216 | chr4 | 8,302,906  | 8,302,963  | 57    | Loss |
| DEL00031219 | chr4 | 8,351,139  | 8,351,399  | 260   | Loss |
| DEL00031221 | chr4 | 8,384,091  | 8,384,236  | 145   | Loss |
| DEL00031225 | chr4 | 8,442,676  | 8,443,129  | 453   | Loss |
| DEL00031226 | chr4 | 8,444,490  | 8,445,082  | 592   | Loss |
| DEL00031232 | chr4 | 8,581,748  | 8,581,808  | 60    | Loss |
| DEL00031244 | chr4 | 8,713,166  | 8,713,236  | 70    | Loss |
| DEL00031246 | chr4 | 8,717,378  | 8,717,706  | 328   | Loss |
| DEL00031247 | chr4 | 8,723,661  | 8,723,748  | 87    | Loss |
| DEL00031254 | chr4 | 8,903,130  | 8,903,223  | 93    | Loss |
| DEL00031258 | chr4 | 8,998,577  | 8,998,683  | 106   | Loss |
| DEL00031260 | chr4 | 9,078,203  | 9,078,580  | 377   | Loss |
| DUP00031262 | chr4 | 9,136,266  | 9,144,620  | 8,354 | Gain |
| DEL00031264 | chr4 | 9,287,979  | 9,288,035  | 56    | Loss |
| DEL00031265 | chr4 | 9,335,272  | 9,335,324  | 52    | Loss |
| DEL00031278 | chr4 | 9,623,152  | 9,623,580  | 428   | Loss |
| DEL00031280 | chr4 | 9,658,185  | 9,658,422  | 237   | Loss |
| DEL00031283 | chr4 | 9,735,852  | 9,736,347  | 495   | Loss |
| DEL00031284 | chr4 | 9,761,437  | 9,765,890  | 4,453 | Loss |
| DEL00031293 | chr4 | 9,967,550  | 9,968,167  | 617   | Loss |
| DEL00031308 | chr4 | 10,365,760 | 10,366,160 | 400   | Loss |
| DEL00031315 | chr4 | 10,415,259 | 10,415,335 | 76    | Loss |
| DEL00031322 | chr4 | 10,624,179 | 10,624,317 | 138   | Loss |
| DEL00031323 | chr4 | 10,631,239 | 10,631,299 | 60    | Loss |
| DEL00031332 | chr4 | 10,714,992 | 10,715,076 | 84    | Loss |
| DEL00031337 | chr4 | 10,825,393 | 10,825,447 | 54    | Loss |
| DEL00031340 | chr4 | 10,835,479 | 10,835,703 | 224   | Loss |
| DEL00031344 | chr4 | 10,896,053 | 10,896,621 | 568   | Loss |
| DUP00031347 | chr4 | 10,955,458 | 10,957,236 | 1,778 | Gain |
| DEL00031353 | chr4 | 11,027,861 | 11,027,966 | 105   | Loss |
| DEL00031360 | chr4 | 11,170,829 | 11,171,403 | 574   | Loss |
| DEL00031362 | chr4 | 11,237,386 | 11,237,917 | 531   | Loss |
| DEL00031365 | chr4 | 11,291,019 | 11,291,078 | 59    | Loss |
| DEL00031366 | chr4 | 11,291,439 | 11,291,581 | 142   | Loss |
| DEL00031368 | chr4 | 11,302,705 | 11,303,420 | 715   | Loss |
| DEL00031372 | chr4 | 11,402,873 | 11,402,960 | 87    | Loss |
| DEL00031376 | chr4 | 11,471,145 | 11,471,259 | 114   | Loss |
| DEL00031378 | chr4 | 11,483,778 | 11,484,047 | 269   | Loss |
| DEL00031379 | chr4 | 11,500,958 | 11,501,177 | 219   | Loss |
| DEL00031381 | chr4 | 11,563,193 | 11,563,982 | 789   | Loss |
| DEL00031384 | chr4 | 11,622,176 | 11,622,289 | 113   | Loss |
| DEL00031387 | chr4 | 11,728,142 | 11,728,225 | 83    | Loss |
| DEL00031388 | chr4 | 11,765,767 | 11,765,826 | 59    | Loss |
| DEL00031389 | chr4 | 11,799,559 | 11,799,717 | 158   | Loss |
| DEL00031392 | chr4 | 11,867,160 | 11,867,225 | 65    | Loss |

|             |      |            |            |        |      |
|-------------|------|------------|------------|--------|------|
| DEL00031393 | chr4 | 11,960,600 | 11,960,656 | 56     | Loss |
| DEL00031396 | chr4 | 12,070,461 | 12,070,550 | 89     | Loss |
| DEL00031400 | chr4 | 12,077,979 | 12,078,230 | 251    | Loss |
| DUP00031401 | chr4 | 12,097,038 | 12,097,197 | 159    | Gain |
| DEL00031406 | chr4 | 12,466,472 | 12,466,944 | 472    | Loss |
| DEL00031407 | chr4 | 12,467,452 | 12,467,565 | 113    | Loss |
| DEL00031414 | chr4 | 12,548,094 | 12,548,950 | 856    | Loss |
| DEL00031415 | chr4 | 12,550,089 | 12,550,150 | 61     | Loss |
| DEL00031421 | chr4 | 12,614,203 | 12,614,276 | 73     | Loss |
| DEL00031423 | chr4 | 12,726,389 | 12,728,049 | 1,660  | Loss |
| DEL00031425 | chr4 | 12,750,986 | 12,751,117 | 131    | Loss |
| DEL00031426 | chr4 | 12,838,344 | 12,838,455 | 111    | Loss |
| DEL00031433 | chr4 | 12,987,968 | 12,988,179 | 211    | Loss |
| DEL00031442 | chr4 | 13,150,102 | 13,150,162 | 60     | Loss |
| DEL00031443 | chr4 | 13,159,326 | 13,159,737 | 411    | Loss |
| DEL00031446 | chr4 | 13,253,944 | 13,254,084 | 140    | Loss |
| DEL00031450 | chr4 | 13,303,955 | 13,304,191 | 236    | Loss |
| DEL00031455 | chr4 | 13,453,114 | 13,453,177 | 63     | Loss |
| DEL00031466 | chr4 | 13,667,076 | 13,667,146 | 70     | Loss |
| DEL00031467 | chr4 | 13,673,383 | 13,673,515 | 132    | Loss |
| DEL00031468 | chr4 | 13,676,831 | 13,676,968 | 137    | Loss |
| DEL00031479 | chr4 | 13,818,726 | 13,819,219 | 493    | Loss |
| DEL00031490 | chr4 | 13,917,709 | 13,917,804 | 95     | Loss |
| DEL00031495 | chr4 | 13,983,927 | 13,984,020 | 93     | Loss |
| DEL00031496 | chr4 | 14,043,162 | 14,044,079 | 917    | Loss |
| DEL00031502 | chr4 | 14,166,610 | 14,166,682 | 72     | Loss |
| DEL00031503 | chr4 | 14,236,837 | 14,236,898 | 61     | Loss |
| DEL00031504 | chr4 | 14,249,556 | 14,249,607 | 51     | Loss |
| DEL00031505 | chr4 | 14,272,780 | 14,272,983 | 203    | Loss |
| DEL00031508 | chr4 | 14,339,934 | 14,340,009 | 75     | Loss |
| DEL00031509 | chr4 | 14,366,050 | 14,366,149 | 99     | Loss |
| DEL00031510 | chr4 | 14,367,380 | 14,367,523 | 143    | Loss |
| DEL00031530 | chr4 | 14,735,582 | 14,736,265 | 683    | Loss |
| DEL00031531 | chr4 | 14,749,210 | 14,749,359 | 149    | Loss |
| DEL00031548 | chr4 | 14,984,417 | 14,985,018 | 601    | Loss |
| DUP00031552 | chr4 | 15,076,443 | 15,087,039 | 10,596 | Gain |
| DEL00031555 | chr4 | 15,117,515 | 15,117,571 | 56     | Loss |
| DEL00031558 | chr4 | 15,155,198 | 15,155,333 | 135    | Loss |
| DEL00031562 | chr4 | 15,196,395 | 15,196,615 | 220    | Loss |
| DEL00031570 | chr4 | 15,538,768 | 15,538,883 | 115    | Loss |
| DEL00031575 | chr4 | 15,786,542 | 15,789,906 | 3,364  | Loss |
| DEL00031586 | chr4 | 15,873,992 | 15,874,380 | 388    | Loss |
| DEL00031590 | chr4 | 15,936,267 | 15,936,932 | 665    | Loss |
| DEL00031606 | chr4 | 16,227,160 | 16,227,224 | 64     | Loss |
| DEL00031610 | chr4 | 16,253,585 | 16,253,946 | 361    | Loss |
| DEL00031615 | chr4 | 16,327,460 | 16,327,547 | 87     | Loss |
| DEL00031617 | chr4 | 16,357,404 | 16,357,542 | 138    | Loss |
| DEL00031620 | chr4 | 16,478,555 | 16,480,209 | 1,654  | Loss |
| DEL00031621 | chr4 | 16,480,576 | 16,480,635 | 59     | Loss |

|             |      |            |            |       |      |
|-------------|------|------------|------------|-------|------|
| DEL00031623 | chr4 | 16,529,516 | 16,529,750 | 234   | Loss |
| DEL00031637 | chr4 | 16,826,997 | 16,827,586 | 589   | Loss |
| DEL00031638 | chr4 | 16,934,473 | 16,934,667 | 194   | Loss |
| DEL00031646 | chr4 | 17,040,232 | 17,040,400 | 168   | Loss |
| DEL00031650 | chr4 | 17,059,766 | 17,059,839 | 73    | Loss |
| DEL00031654 | chr4 | 17,075,124 | 17,075,270 | 146   | Loss |
| DEL00031655 | chr4 | 17,080,233 | 17,080,469 | 236   | Loss |
| DEL00031659 | chr4 | 17,103,563 | 17,105,017 | 1,454 | Loss |
| DEL00031672 | chr4 | 17,607,681 | 17,607,969 | 288   | Loss |
| DEL00031677 | chr4 | 17,665,457 | 17,666,284 | 827   | Loss |
| DEL00031689 | chr4 | 17,976,011 | 17,976,065 | 54    | Loss |
| DEL00031691 | chr4 | 17,988,714 | 17,991,308 | 2,594 | Loss |
| DEL00031696 | chr4 | 18,064,254 | 18,066,623 | 2,369 | Loss |
| DEL00031697 | chr4 | 18,108,120 | 18,108,226 | 106   | Loss |
| DEL00031699 | chr4 | 18,134,704 | 18,135,504 | 800   | Loss |
| DEL00031731 | chr4 | 18,683,323 | 18,686,632 | 3,309 | Loss |
| DEL00031737 | chr4 | 19,172,403 | 19,172,674 | 271   | Loss |
| DEL00031747 | chr4 | 19,275,018 | 19,277,823 | 2,805 | Loss |
| DEL00031754 | chr4 | 19,451,291 | 19,453,414 | 2,123 | Loss |
| DEL00031791 | chr4 | 20,162,482 | 20,162,689 | 207   | Loss |
| DEL00031792 | chr4 | 20,164,347 | 20,164,511 | 164   | Loss |
| DEL00031797 | chr4 | 20,253,672 | 20,253,735 | 63    | Loss |
| DEL00031803 | chr4 | 20,333,360 | 20,333,477 | 117   | Loss |
| DEL00031808 | chr4 | 20,465,681 | 20,466,032 | 351   | Loss |
| DEL00031815 | chr4 | 20,576,581 | 20,582,412 | 5,831 | Loss |
| DEL00031820 | chr4 | 20,632,100 | 20,632,156 | 56    | Loss |
| DEL00031821 | chr4 | 20,643,795 | 20,644,788 | 993   | Loss |
| DEL00031822 | chr4 | 20,656,580 | 20,656,796 | 216   | Loss |
| DEL00031839 | chr4 | 20,894,041 | 20,894,094 | 53    | Loss |
| DEL00031840 | chr4 | 20,910,446 | 20,910,519 | 73    | Loss |
| DEL00031842 | chr4 | 20,973,557 | 20,973,822 | 265   | Loss |
| DEL00031853 | chr4 | 21,160,311 | 21,161,435 | 1,124 | Loss |
| DEL00031861 | chr4 | 21,209,888 | 21,209,942 | 54    | Loss |
| DEL00031873 | chr4 | 21,295,819 | 21,295,897 | 78    | Loss |
| DEL00031880 | chr4 | 21,331,177 | 21,331,294 | 117   | Loss |
| DEL00031885 | chr4 | 21,373,210 | 21,374,190 | 980   | Loss |
| DEL00031887 | chr4 | 21,400,689 | 21,401,188 | 499   | Loss |
| DUP00031895 | chr4 | 21,483,138 | 21,483,355 | 217   | Gain |
| DEL00031905 | chr4 | 21,543,823 | 21,544,547 | 724   | Loss |
| DEL00031911 | chr4 | 21,556,997 | 21,557,565 | 568   | Loss |
| DEL00031914 | chr4 | 21,605,711 | 21,605,766 | 55    | Loss |
| DEL00031919 | chr4 | 21,672,334 | 21,672,556 | 222   | Loss |
| DEL00031924 | chr4 | 21,853,634 | 21,853,942 | 308   | Loss |
| DEL00031928 | chr4 | 21,873,689 | 21,873,961 | 272   | Loss |
| DEL00031933 | chr4 | 21,895,786 | 21,897,005 | 1,219 | Loss |
| DEL00031940 | chr4 | 21,953,226 | 21,953,603 | 377   | Loss |
| DUP00031946 | chr4 | 22,031,141 | 22,031,312 | 171   | Gain |
| DEL00031947 | chr4 | 22,046,959 | 22,047,486 | 527   | Loss |
| DEL00031957 | chr4 | 22,192,520 | 22,193,027 | 507   | Loss |



|             |      |            |            |        |      |
|-------------|------|------------|------------|--------|------|
| DEL00031958 | chr4 | 22,229,240 | 22,229,443 | 203    | Loss |
| DEL00031978 | chr4 | 22,302,580 | 22,303,467 | 887    | Loss |
| DEL00031980 | chr4 | 22,375,245 | 22,375,310 | 65     | Loss |
| DEL00031981 | chr4 | 22,377,521 | 22,378,931 | 1,410  | Loss |
| DEL00031984 | chr4 | 22,423,873 | 22,423,935 | 62     | Loss |
| DEL00031986 | chr4 | 22,449,181 | 22,449,943 | 762    | Loss |
| DEL00031987 | chr4 | 22,459,331 | 22,459,395 | 64     | Loss |
| DEL00031991 | chr4 | 22,489,728 | 22,490,505 | 777    | Loss |
| DEL00032000 | chr4 | 22,586,841 | 22,588,429 | 1,588  | Loss |
| DEL00032025 | chr4 | 22,774,562 | 22,774,699 | 137    | Loss |
| DEL00032026 | chr4 | 22,792,530 | 22,792,614 | 84     | Loss |
| DEL00032029 | chr4 | 22,824,612 | 22,824,869 | 257    | Loss |
| DEL00032033 | chr4 | 22,888,830 | 22,888,970 | 140    | Loss |
| DEL00032038 | chr4 | 22,909,257 | 22,910,247 | 990    | Loss |
| DEL00032041 | chr4 | 22,919,709 | 22,920,069 | 360    | Loss |
| DEL00032044 | chr4 | 22,968,788 | 22,968,898 | 110    | Loss |
| DEL00032046 | chr4 | 22,996,439 | 22,996,894 | 455    | Loss |
| DEL00032064 | chr4 | 23,123,620 | 23,124,827 | 1,207  | Loss |
| DEL00032065 | chr4 | 23,142,376 | 23,142,533 | 157    | Loss |
| DEL00032067 | chr4 | 23,209,914 | 23,210,130 | 216    | Loss |
| DEL00032068 | chr4 | 23,232,041 | 23,232,103 | 62     | Loss |
| DEL00032071 | chr4 | 23,273,589 | 23,273,644 | 55     | Loss |
| DEL00032076 | chr4 | 23,331,916 | 23,332,627 | 711    | Loss |
| DEL00032078 | chr4 | 23,372,510 | 23,372,632 | 122    | Loss |
| DEL00032085 | chr4 | 23,463,607 | 23,464,259 | 652    | Loss |
| DEL00032089 | chr4 | 23,510,916 | 23,511,577 | 661    | Loss |
| DEL00032098 | chr4 | 23,644,055 | 23,644,352 | 297    | Loss |
| DEL00032104 | chr4 | 23,875,516 | 23,875,579 | 63     | Loss |
| DUP00032167 | chr4 | 24,142,988 | 24,143,341 | 353    | Gain |
| DUP00032225 | chr4 | 24,150,574 | 24,150,888 | 314    | Gain |
| DEL00032248 | chr4 | 24,192,210 | 24,192,902 | 692    | Loss |
| DEL00032253 | chr4 | 24,278,762 | 24,278,831 | 69     | Loss |
| DEL00032255 | chr4 | 24,294,622 | 24,294,731 | 109    | Loss |
| DEL00032256 | chr4 | 24,298,415 | 24,299,053 | 638    | Loss |
| DEL00032259 | chr4 | 24,325,300 | 24,325,440 | 140    | Loss |
| DUP00032264 | chr4 | 24,348,746 | 24,348,852 | 106    | Gain |
| DUP00032266 | chr4 | 24,359,047 | 24,359,152 | 105    | Gain |
| DEL00032286 | chr4 | 24,478,339 | 24,478,435 | 96     | Loss |
| DEL00032291 | chr4 | 24,509,710 | 24,510,380 | 670    | Loss |
| DUP00032299 | chr4 | 24,547,249 | 24,562,562 | 15,313 | Gain |
| DEL00032304 | chr4 | 24,572,435 | 24,572,508 | 73     | Loss |
| DEL00032310 | chr4 | 24,789,220 | 24,789,531 | 311    | Loss |
| DEL00032311 | chr4 | 24,795,130 | 24,795,256 | 126    | Loss |
| DEL00032320 | chr4 | 24,921,324 | 24,921,425 | 101    | Loss |
| DEL00032321 | chr4 | 24,953,156 | 24,954,077 | 921    | Loss |
| DEL00032323 | chr4 | 24,982,732 | 24,982,952 | 220    | Loss |
| DEL00032325 | chr4 | 24,989,598 | 24,989,662 | 64     | Loss |
| DEL00032330 | chr4 | 25,059,334 | 25,059,685 | 351    | Loss |
| DEL00032331 | chr4 | 25,060,397 | 25,060,452 | 55     | Loss |

|             |      |            |            |       |      |
|-------------|------|------------|------------|-------|------|
| DEL00032344 | chr4 | 25,181,207 | 25,181,292 | 85    | Loss |
| DEL00032345 | chr4 | 25,198,921 | 25,199,458 | 537   | Loss |
| DEL00032347 | chr4 | 25,219,848 | 25,220,283 | 435   | Loss |
| DEL00032348 | chr4 | 25,239,285 | 25,239,347 | 62    | Loss |
| DEL00032349 | chr4 | 25,250,506 | 25,250,683 | 177   | Loss |
| DEL00032352 | chr4 | 25,303,429 | 25,303,627 | 198   | Loss |
| DEL00032354 | chr4 | 25,333,954 | 25,334,146 | 192   | Loss |
| DEL00032360 | chr4 | 25,363,116 | 25,363,663 | 547   | Loss |
| DEL00032377 | chr4 | 25,599,490 | 25,599,623 | 133   | Loss |
| DEL00032379 | chr4 | 25,626,683 | 25,626,796 | 113   | Loss |
| DEL00032384 | chr4 | 25,737,374 | 25,738,974 | 1,600 | Loss |
| DEL00032389 | chr4 | 25,849,623 | 25,849,932 | 309   | Loss |
| DEL00032392 | chr4 | 25,896,073 | 25,896,135 | 62    | Loss |
| DEL00032406 | chr4 | 25,996,712 | 25,997,440 | 728   | Loss |
| DEL00032408 | chr4 | 26,054,543 | 26,055,097 | 554   | Loss |
| DEL00032412 | chr4 | 26,167,166 | 26,168,524 | 1,358 | Loss |
| DEL00032414 | chr4 | 26,173,389 | 26,174,021 | 632   | Loss |
| DEL00032420 | chr4 | 26,210,519 | 26,211,699 | 1,180 | Loss |
| DEL00032429 | chr4 | 26,344,117 | 26,344,430 | 313   | Loss |
| DEL00032438 | chr4 | 26,484,127 | 26,484,585 | 458   | Loss |
| DEL00032441 | chr4 | 26,600,881 | 26,601,037 | 156   | Loss |
| DEL00032444 | chr4 | 26,620,358 | 26,620,908 | 550   | Loss |
| DEL00032453 | chr4 | 26,711,794 | 26,711,846 | 52    | Loss |
| DEL00032457 | chr4 | 26,792,440 | 26,792,562 | 122   | Loss |
| DEL00032460 | chr4 | 26,909,368 | 26,909,761 | 393   | Loss |
| DEL00032465 | chr4 | 26,971,761 | 26,971,953 | 192   | Loss |
| DEL00032472 | chr4 | 27,040,279 | 27,040,629 | 350   | Loss |
| DEL00032483 | chr4 | 27,234,144 | 27,235,063 | 919   | Loss |
| DEL00032489 | chr4 | 27,329,191 | 27,329,373 | 182   | Loss |
| DEL00032492 | chr4 | 27,339,431 | 27,339,813 | 382   | Loss |
| DEL00032500 | chr4 | 27,365,301 | 27,368,180 | 2,879 | Loss |
| DEL00032505 | chr4 | 27,483,930 | 27,483,984 | 54    | Loss |
| DEL00032511 | chr4 | 27,583,664 | 27,583,880 | 216   | Loss |
| DEL00032518 | chr4 | 27,653,731 | 27,653,977 | 246   | Loss |
| DEL00032527 | chr4 | 27,720,781 | 27,722,549 | 1,768 | Loss |
| DEL00032542 | chr4 | 27,910,074 | 27,910,371 | 297   | Loss |
| DEL00032549 | chr4 | 28,065,020 | 28,065,370 | 350   | Loss |
| DEL00032550 | chr4 | 28,138,315 | 28,138,509 | 194   | Loss |
| DEL00032551 | chr4 | 28,146,796 | 28,147,149 | 353   | Loss |
| DEL00032566 | chr4 | 28,380,122 | 28,380,182 | 60    | Loss |
| DEL00032571 | chr4 | 28,490,799 | 28,490,873 | 74    | Loss |
| DEL00032579 | chr4 | 28,546,743 | 28,547,241 | 498   | Loss |
| DEL00032584 | chr4 | 28,612,438 | 28,613,041 | 603   | Loss |
| DEL00032586 | chr4 | 28,642,117 | 28,642,168 | 51    | Loss |
| DEL00032587 | chr4 | 28,658,337 | 28,658,439 | 102   | Loss |
| DEL00032610 | chr4 | 29,000,702 | 29,001,196 | 494   | Loss |
| DEL00032617 | chr4 | 29,131,779 | 29,132,287 | 508   | Loss |
| DEL00032622 | chr4 | 29,158,459 | 29,158,766 | 307   | Loss |
| DEL00032623 | chr4 | 29,176,238 | 29,176,326 | 88    | Loss |

|             |      |            |            |       |      |
|-------------|------|------------|------------|-------|------|
| DEL00032624 | chr4 | 29,191,028 | 29,191,115 | 87    | Loss |
| DEL00032625 | chr4 | 29,208,214 | 29,208,304 | 90    | Loss |
| DEL00032632 | chr4 | 29,245,441 | 29,245,541 | 100   | Loss |
| DEL00032635 | chr4 | 29,263,729 | 29,264,028 | 299   | Loss |
| DEL00032646 | chr4 | 29,495,307 | 29,495,422 | 115   | Loss |
| DEL00032648 | chr4 | 29,519,703 | 29,519,804 | 101   | Loss |
| DEL00032651 | chr4 | 29,559,792 | 29,560,706 | 914   | Loss |
| DEL00032655 | chr4 | 29,590,244 | 29,590,846 | 602   | Loss |
| DEL00032663 | chr4 | 29,653,408 | 29,654,598 | 1,190 | Loss |
| DEL00032669 | chr4 | 29,747,040 | 29,747,112 | 72    | Loss |
| DEL00032672 | chr4 | 29,816,359 | 29,817,564 | 1,205 | Loss |
| DEL00032673 | chr4 | 29,821,177 | 29,822,683 | 1,506 | Loss |
| DEL00032681 | chr4 | 30,004,453 | 30,005,033 | 580   | Loss |
| DEL00032684 | chr4 | 30,028,471 | 30,028,849 | 378   | Loss |
| DEL00032687 | chr4 | 30,106,313 | 30,106,841 | 528   | Loss |
| DEL00032688 | chr4 | 30,108,790 | 30,109,310 | 520   | Loss |
| DEL00032690 | chr4 | 30,111,008 | 30,111,183 | 175   | Loss |
| DEL00032694 | chr4 | 30,155,842 | 30,156,005 | 163   | Loss |
| DEL00032696 | chr4 | 30,186,849 | 30,186,928 | 79    | Loss |
| DEL00032699 | chr4 | 30,256,795 | 30,257,489 | 694   | Loss |
| DEL00032702 | chr4 | 30,296,873 | 30,296,966 | 93    | Loss |
| DEL00032715 | chr4 | 30,542,759 | 30,542,818 | 59    | Loss |
| DEL00032717 | chr4 | 30,557,748 | 30,558,277 | 529   | Loss |
| DEL00032730 | chr4 | 30,881,110 | 30,881,737 | 627   | Loss |
| DEL00032732 | chr4 | 30,914,490 | 30,914,616 | 126   | Loss |
| DEL00032739 | chr4 | 30,987,174 | 30,987,279 | 105   | Loss |
| DEL00032749 | chr4 | 31,098,897 | 31,099,031 | 134   | Loss |
| DEL00032755 | chr4 | 31,209,033 | 31,209,190 | 157   | Loss |
| DEL00032756 | chr4 | 31,213,417 | 31,213,657 | 240   | Loss |
| DEL00032763 | chr4 | 31,288,391 | 31,288,460 | 69    | Loss |
| DEL00032765 | chr4 | 31,330,977 | 31,331,200 | 223   | Loss |
| DEL00032775 | chr4 | 31,400,576 | 31,402,951 | 2,375 | Loss |
| DEL00032776 | chr4 | 31,403,128 | 31,403,634 | 506   | Loss |
| DEL00032779 | chr4 | 31,427,470 | 31,427,554 | 84    | Loss |
| DEL00032782 | chr4 | 31,473,976 | 31,474,630 | 654   | Loss |
| DEL00032784 | chr4 | 31,610,545 | 31,610,596 | 51    | Loss |
| DEL00032787 | chr4 | 31,672,441 | 31,672,501 | 60    | Loss |
| DEL00032792 | chr4 | 31,697,054 | 31,697,106 | 52    | Loss |
| DEL00032794 | chr4 | 31,759,659 | 31,759,891 | 232   | Loss |
| DEL00032798 | chr4 | 31,831,942 | 31,831,996 | 54    | Loss |
| DEL00032800 | chr4 | 31,900,303 | 31,900,403 | 100   | Loss |
| DEL00032805 | chr4 | 32,032,610 | 32,039,541 | 6,931 | Loss |
| DEL00032813 | chr4 | 32,193,753 | 32,194,341 | 588   | Loss |
| DEL00032814 | chr4 | 32,237,497 | 32,237,724 | 227   | Loss |
| DEL00032820 | chr4 | 32,467,740 | 32,467,791 | 51    | Loss |
| DEL00032823 | chr4 | 32,591,079 | 32,591,251 | 172   | Loss |
| DEL00032830 | chr4 | 32,693,317 | 32,693,465 | 148   | Loss |
| DEL00032835 | chr4 | 32,811,559 | 32,811,622 | 63    | Loss |
| DEL00032837 | chr4 | 32,826,012 | 32,826,433 | 421   | Loss |

|             |      |            |            |        |      |
|-------------|------|------------|------------|--------|------|
| DEL00032842 | chr4 | 32,967,313 | 32,968,366 | 1,053  | Loss |
| DEL00032846 | chr4 | 32,997,745 | 32,998,070 | 325    | Loss |
| DEL00032850 | chr4 | 33,059,942 | 33,060,138 | 196    | Loss |
| DEL00032851 | chr4 | 33,116,588 | 33,116,653 | 65     | Loss |
| DEL00032852 | chr4 | 33,133,284 | 33,134,093 | 809    | Loss |
| DEL00032855 | chr4 | 33,147,625 | 33,147,694 | 69     | Loss |
| DEL00032858 | chr4 | 33,232,288 | 33,232,728 | 440    | Loss |
| DEL00032865 | chr4 | 33,268,435 | 33,268,519 | 84     | Loss |
| DEL00032867 | chr4 | 33,357,595 | 33,358,395 | 800    | Loss |
| DUP00032876 | chr4 | 33,487,347 | 33,487,590 | 243    | Gain |
| DUP00032881 | chr4 | 33,515,729 | 33,530,457 | 14,728 | Gain |
| DEL00032885 | chr4 | 33,563,642 | 33,564,517 | 875    | Loss |
| DEL00032886 | chr4 | 33,610,795 | 33,610,913 | 118    | Loss |
| DEL00032887 | chr4 | 33,629,209 | 33,629,477 | 268    | Loss |
| DEL00032896 | chr4 | 33,878,439 | 33,879,750 | 1,311  | Loss |
| DEL00032897 | chr4 | 33,893,989 | 33,894,218 | 229    | Loss |
| DEL00032903 | chr4 | 33,989,213 | 33,989,265 | 52     | Loss |
| DEL00032904 | chr4 | 33,991,486 | 33,991,557 | 71     | Loss |
| DUP00032907 | chr4 | 34,044,578 | 34,044,675 | 97     | Gain |
| DEL00032908 | chr4 | 34,110,456 | 34,110,552 | 96     | Loss |
| DEL00032910 | chr4 | 34,162,044 | 34,162,241 | 197    | Loss |
| DEL00032917 | chr4 | 34,274,953 | 34,275,009 | 56     | Loss |
| DEL00032919 | chr4 | 34,344,406 | 34,344,951 | 545    | Loss |
| DEL00032921 | chr4 | 34,442,748 | 34,442,823 | 75     | Loss |
| DEL00032924 | chr4 | 34,538,596 | 34,538,780 | 184    | Loss |
| DEL00032929 | chr4 | 34,582,635 | 34,582,752 | 117    | Loss |
| DEL00032931 | chr4 | 34,589,899 | 34,590,298 | 399    | Loss |
| DEL00032933 | chr4 | 34,637,452 | 34,637,947 | 495    | Loss |
| DEL00032944 | chr4 | 34,752,970 | 34,753,028 | 58     | Loss |
| DEL00032949 | chr4 | 34,798,625 | 34,798,705 | 80     | Loss |
| DEL00032953 | chr4 | 34,895,207 | 34,895,921 | 714    | Loss |
| DEL00032954 | chr4 | 34,903,585 | 34,903,640 | 55     | Loss |
| DEL00032970 | chr4 | 35,279,701 | 35,279,799 | 98     | Loss |
| DEL00032971 | chr4 | 35,285,366 | 35,285,637 | 271    | Loss |
| DEL00032972 | chr4 | 35,311,921 | 35,312,663 | 742    | Loss |
| DEL00032977 | chr4 | 35,362,089 | 35,362,390 | 301    | Loss |
| DEL00032978 | chr4 | 35,375,129 | 35,375,330 | 201    | Loss |
| DEL00032983 | chr4 | 35,468,481 | 35,468,823 | 342    | Loss |
| DEL00032984 | chr4 | 35,478,870 | 35,478,959 | 89     | Loss |
| DEL00032990 | chr4 | 35,598,312 | 35,598,573 | 261    | Loss |
| DEL00032992 | chr4 | 35,657,739 | 35,658,179 | 440    | Loss |
| DUP00032993 | chr4 | 35,695,779 | 35,711,663 | 15,884 | Gain |
| DEL00032999 | chr4 | 35,798,029 | 35,801,467 | 3,438  | Loss |
| DEL00033004 | chr4 | 35,804,795 | 35,804,851 | 56     | Loss |
| DEL00033006 | chr4 | 35,819,728 | 35,819,810 | 82     | Loss |
| DEL00033010 | chr4 | 35,825,743 | 35,826,378 | 635    | Loss |
| DEL00033011 | chr4 | 35,828,132 | 35,828,437 | 305    | Loss |
| DEL00033015 | chr4 | 35,860,555 | 35,860,885 | 330    | Loss |
| DEL00033017 | chr4 | 35,896,683 | 35,896,778 | 95     | Loss |

|             |      |            |            |       |      |
|-------------|------|------------|------------|-------|------|
| DEL00033022 | chr4 | 35,999,707 | 35,999,878 | 171   | Loss |
| DEL00033029 | chr4 | 36,023,091 | 36,023,663 | 572   | Loss |
| DEL00033036 | chr4 | 36,062,721 | 36,062,927 | 206   | Loss |
| DUP00033037 | chr4 | 36,069,652 | 36,069,759 | 107   | Gain |
| DEL00033038 | chr4 | 36,079,594 | 36,079,821 | 227   | Loss |
| DEL00033039 | chr4 | 36,080,542 | 36,080,811 | 269   | Loss |
| DEL00033049 | chr4 | 36,287,777 | 36,288,268 | 491   | Loss |
| DEL00033050 | chr4 | 36,309,446 | 36,309,697 | 251   | Loss |
| DEL00033072 | chr4 | 36,769,225 | 36,769,278 | 53    | Loss |
| DEL00033088 | chr4 | 37,110,423 | 37,110,582 | 159   | Loss |
| DEL00033089 | chr4 | 37,118,567 | 37,118,675 | 108   | Loss |
| DEL00033093 | chr4 | 37,157,373 | 37,157,440 | 67    | Loss |
| DEL00033096 | chr4 | 37,185,896 | 37,185,986 | 90    | Loss |
| DEL00033098 | chr4 | 37,261,125 | 37,262,458 | 1,333 | Loss |
| DEL00033108 | chr4 | 37,398,122 | 37,398,174 | 52    | Loss |
| DEL00033111 | chr4 | 37,407,199 | 37,407,266 | 67    | Loss |
| DEL00033114 | chr4 | 37,443,523 | 37,443,581 | 58    | Loss |
| DEL00033116 | chr4 | 37,447,348 | 37,447,460 | 112   | Loss |
| DEL00033117 | chr4 | 37,453,691 | 37,453,758 | 67    | Loss |
| DEL00033119 | chr4 | 37,565,368 | 37,565,689 | 321   | Loss |
| DEL00033121 | chr4 | 37,611,623 | 37,611,802 | 179   | Loss |
| DEL00033127 | chr4 | 37,795,549 | 37,795,751 | 202   | Loss |
| DEL00033137 | chr4 | 37,945,357 | 37,945,596 | 239   | Loss |
| DEL00033142 | chr4 | 37,977,563 | 37,977,628 | 65    | Loss |
| DEL00033145 | chr4 | 38,024,264 | 38,028,386 | 4,122 | Loss |
| DEL00033149 | chr4 | 38,214,813 | 38,214,948 | 135   | Loss |
| DEL00033154 | chr4 | 38,218,780 | 38,218,834 | 54    | Loss |
| DEL00033165 | chr4 | 38,356,087 | 38,356,223 | 136   | Loss |
| DEL00033166 | chr4 | 38,361,393 | 38,361,625 | 232   | Loss |
| DEL00033168 | chr4 | 38,386,203 | 38,386,722 | 519   | Loss |
| DEL00033175 | chr4 | 38,479,368 | 38,479,429 | 61    | Loss |
| DEL00033176 | chr4 | 38,550,638 | 38,550,722 | 84    | Loss |
| DEL00033179 | chr4 | 38,603,475 | 38,603,690 | 215   | Loss |
| DUP00033196 | chr4 | 38,878,775 | 38,881,237 | 2,462 | Gain |
| DEL00033201 | chr4 | 38,930,123 | 38,930,211 | 88    | Loss |
| DEL00033206 | chr4 | 39,003,847 | 39,004,309 | 462   | Loss |
| DEL00033207 | chr4 | 39,011,912 | 39,011,999 | 87    | Loss |
| DEL00033209 | chr4 | 39,082,148 | 39,082,486 | 338   | Loss |
| DEL00033216 | chr4 | 39,188,208 | 39,188,459 | 251   | Loss |
| DEL00033217 | chr4 | 39,213,027 | 39,213,082 | 55    | Loss |
| DEL00033218 | chr4 | 39,213,233 | 39,213,983 | 750   | Loss |
| DUP00033219 | chr4 | 39,230,999 | 39,231,224 | 225   | Gain |
| DEL00033220 | chr4 | 39,248,965 | 39,249,184 | 219   | Loss |
| DEL00033223 | chr4 | 39,317,265 | 39,317,355 | 90    | Loss |
| DEL00033226 | chr4 | 39,487,754 | 39,487,875 | 121   | Loss |
| DEL00033232 | chr4 | 39,610,302 | 39,610,623 | 321   | Loss |
| DEL00033241 | chr4 | 39,720,429 | 39,720,502 | 73    | Loss |
| DEL00033250 | chr4 | 40,064,560 | 40,065,734 | 1,174 | Loss |
| DEL00033251 | chr4 | 40,072,146 | 40,072,295 | 149   | Loss |

|             |      |            |            |        |      |
|-------------|------|------------|------------|--------|------|
| DEL00033259 | chr4 | 40,187,406 | 40,187,909 | 503    | Loss |
| DEL00033270 | chr4 | 40,409,930 | 40,410,515 | 585    | Loss |
| DEL00033274 | chr4 | 40,450,422 | 40,451,273 | 851    | Loss |
| DEL00033278 | chr4 | 40,529,864 | 40,530,003 | 139    | Loss |
| DEL00033284 | chr4 | 40,721,586 | 40,722,817 | 1,231  | Loss |
| DEL00033285 | chr4 | 40,726,068 | 40,726,120 | 52     | Loss |
| DEL00033288 | chr4 | 40,769,063 | 40,769,135 | 72     | Loss |
| DEL00033301 | chr4 | 41,004,336 | 41,004,616 | 280    | Loss |
| DEL00033302 | chr4 | 41,009,360 | 41,011,603 | 2,243  | Loss |
| DEL00033311 | chr4 | 41,170,653 | 41,172,420 | 1,767  | Loss |
| DEL00033323 | chr4 | 41,322,618 | 41,322,784 | 166    | Loss |
| DEL00033336 | chr4 | 41,534,199 | 41,534,411 | 212    | Loss |
| DEL00033340 | chr4 | 41,584,817 | 41,584,987 | 170    | Loss |
| DEL00033342 | chr4 | 41,717,545 | 41,717,682 | 137    | Loss |
| DEL00033345 | chr4 | 41,807,520 | 41,807,634 | 114    | Loss |
| DEL00033348 | chr4 | 41,823,139 | 41,823,651 | 512    | Loss |
| DEL00033355 | chr4 | 41,861,605 | 41,862,584 | 979    | Loss |
| DEL00033356 | chr4 | 41,911,037 | 41,911,090 | 53     | Loss |
| DEL00033357 | chr4 | 41,915,393 | 41,918,433 | 3,040  | Loss |
| DEL00033361 | chr4 | 41,961,798 | 41,961,925 | 127    | Loss |
| DEL00033372 | chr4 | 42,081,771 | 42,081,828 | 57     | Loss |
| DEL00033373 | chr4 | 42,098,994 | 42,099,216 | 222    | Loss |
| DEL00033377 | chr4 | 42,118,492 | 42,118,569 | 77     | Loss |
| DEL00033379 | chr4 | 42,150,256 | 42,150,636 | 380    | Loss |
| DUP00033380 | chr4 | 42,218,670 | 42,218,907 | 237    | Gain |
| DEL00033382 | chr4 | 42,239,805 | 42,239,879 | 74     | Loss |
| DEL00033383 | chr4 | 42,252,705 | 42,252,812 | 107    | Loss |
| DUP00033385 | chr4 | 42,282,571 | 42,283,231 | 660    | Gain |
| DEL00033391 | chr4 | 42,328,175 | 42,328,606 | 431    | Loss |
| DEL00033395 | chr4 | 42,381,400 | 42,381,749 | 349    | Loss |
| DEL00033400 | chr4 | 42,448,787 | 42,449,393 | 606    | Loss |
| DEL00033403 | chr4 | 42,492,555 | 42,497,568 | 5,013  | Loss |
| DEL00033405 | chr4 | 42,513,968 | 42,514,067 | 99     | Loss |
| DEL00033410 | chr4 | 42,593,376 | 42,593,568 | 192    | Loss |
| DUP00033422 | chr4 | 42,772,458 | 42,787,921 | 15,463 | Gain |
| DEL00033423 | chr4 | 42,799,116 | 42,799,720 | 604    | Loss |
| DEL00033429 | chr4 | 42,932,207 | 42,932,531 | 324    | Loss |
| DEL00033433 | chr4 | 42,986,536 | 42,986,626 | 90     | Loss |
| DEL00033447 | chr4 | 43,302,156 | 43,303,970 | 1,814  | Loss |
| DEL00033453 | chr4 | 43,378,348 | 43,378,651 | 303    | Loss |
| DEL00033454 | chr4 | 43,388,465 | 43,388,754 | 289    | Loss |
| DEL00033456 | chr4 | 43,391,294 | 43,391,350 | 56     | Loss |
| DEL00033458 | chr4 | 43,431,000 | 43,432,044 | 1,044  | Loss |
| DEL00033460 | chr4 | 43,498,439 | 43,498,526 | 87     | Loss |
| DEL00033468 | chr4 | 43,688,492 | 43,689,342 | 850    | Loss |
| DEL00033469 | chr4 | 43,694,698 | 43,694,796 | 98     | Loss |
| DEL00033470 | chr4 | 43,697,031 | 43,698,002 | 971    | Loss |
| DEL00033480 | chr4 | 43,875,734 | 43,876,556 | 822    | Loss |
| DEL00033481 | chr4 | 43,879,481 | 43,879,570 | 89     | Loss |

|             |      |            |            |        |      |
|-------------|------|------------|------------|--------|------|
| DEL00033485 | chr4 | 43,948,751 | 43,954,207 | 5,456  | Loss |
| DEL00033490 | chr4 | 44,033,623 | 44,033,687 | 64     | Loss |
| DEL00033492 | chr4 | 44,087,191 | 44,088,442 | 1,251  | Loss |
| DEL00033499 | chr4 | 44,208,338 | 44,208,428 | 90     | Loss |
| DEL00033502 | chr4 | 44,259,463 | 44,259,739 | 276    | Loss |
| DEL00033509 | chr4 | 44,311,577 | 44,311,630 | 53     | Loss |
| DEL00033511 | chr4 | 44,333,880 | 44,334,499 | 619    | Loss |
| DEL00033515 | chr4 | 44,386,415 | 44,386,576 | 161    | Loss |
| DEL00033519 | chr4 | 44,399,035 | 44,399,262 | 227    | Loss |
| DEL00033524 | chr4 | 44,440,378 | 44,440,471 | 93     | Loss |
| DEL00033525 | chr4 | 44,456,691 | 44,457,182 | 491    | Loss |
| DEL00033526 | chr4 | 44,468,825 | 44,468,882 | 57     | Loss |
| DEL00033536 | chr4 | 44,543,404 | 44,543,572 | 168    | Loss |
| DEL00033542 | chr4 | 44,674,741 | 44,675,429 | 688    | Loss |
| DEL00033545 | chr4 | 44,790,339 | 44,790,396 | 57     | Loss |
| DEL00033551 | chr4 | 44,843,526 | 44,843,818 | 292    | Loss |
| DEL00033553 | chr4 | 44,966,263 | 44,966,329 | 66     | Loss |
| DEL00033556 | chr4 | 45,053,517 | 45,053,902 | 385    | Loss |
| DEL00033559 | chr4 | 45,207,123 | 45,207,194 | 71     | Loss |
| DEL00033560 | chr4 | 45,215,934 | 45,216,115 | 181    | Loss |
| DEL00033563 | chr4 | 45,394,010 | 45,394,099 | 89     | Loss |
| DEL00033564 | chr4 | 45,524,099 | 45,524,213 | 114    | Loss |
| DEL00033566 | chr4 | 45,550,101 | 45,550,851 | 750    | Loss |
| DEL00033571 | chr4 | 45,588,718 | 45,588,782 | 64     | Loss |
| DEL00033575 | chr4 | 45,764,513 | 45,764,571 | 58     | Loss |
| DEL00033581 | chr4 | 45,917,253 | 45,917,784 | 531    | Loss |
| DEL00033585 | chr4 | 45,966,826 | 45,966,951 | 125    | Loss |
| DEL00033586 | chr4 | 45,985,393 | 45,985,780 | 387    | Loss |
| DEL00033594 | chr4 | 46,108,995 | 46,109,059 | 64     | Loss |
| DEL00033595 | chr4 | 46,118,134 | 46,118,392 | 258    | Loss |
| DEL00033596 | chr4 | 46,128,634 | 46,128,833 | 199    | Loss |
| DEL00033597 | chr4 | 46,132,611 | 46,132,904 | 293    | Loss |
| DEL00033598 | chr4 | 46,136,840 | 46,136,901 | 61     | Loss |
| DEL00033601 | chr4 | 46,204,908 | 46,204,981 | 73     | Loss |
| DUP00033614 | chr4 | 46,396,579 | 46,406,934 | 10,355 | Gain |
| DEL00033619 | chr4 | 46,476,248 | 46,476,735 | 487    | Loss |
| DEL00033629 | chr4 | 46,562,879 | 46,563,185 | 306    | Loss |
| DEL00033632 | chr4 | 46,579,763 | 46,580,342 | 579    | Loss |
| DEL00033640 | chr4 | 46,680,658 | 46,680,718 | 60     | Loss |
| DEL00033643 | chr4 | 46,739,524 | 46,740,654 | 1,130  | Loss |
| DEL00033647 | chr4 | 46,918,993 | 46,919,045 | 52     | Loss |
| DEL00033672 | chr4 | 47,200,058 | 47,200,151 | 93     | Loss |
| DEL00033673 | chr4 | 47,290,213 | 47,290,410 | 197    | Loss |
| DEL00033674 | chr4 | 47,298,964 | 47,299,043 | 79     | Loss |
| DEL00033679 | chr4 | 47,345,293 | 47,345,586 | 293    | Loss |
| DEL00033680 | chr4 | 47,346,499 | 47,346,565 | 66     | Loss |
| DEL00033682 | chr4 | 47,374,367 | 47,374,562 | 195    | Loss |
| DEL00033683 | chr4 | 47,441,907 | 47,442,440 | 533    | Loss |
| DEL00033694 | chr4 | 47,723,834 | 47,724,064 | 230    | Loss |

|             |      |            |            |       |      |
|-------------|------|------------|------------|-------|------|
| DEL00033696 | chr4 | 47,768,350 | 47,768,763 | 413   | Loss |
| DEL00033699 | chr4 | 47,856,565 | 47,857,300 | 735   | Loss |
| DEL00033702 | chr4 | 47,883,729 | 47,883,789 | 60    | Loss |
| DEL00033706 | chr4 | 47,960,514 | 47,960,773 | 259   | Loss |
| DEL00033712 | chr4 | 48,315,903 | 48,316,046 | 143   | Loss |
| DEL00033718 | chr4 | 48,366,606 | 48,374,115 | 7,509 | Loss |
| DEL00033724 | chr4 | 48,425,214 | 48,425,289 | 75    | Loss |
| DEL00033728 | chr4 | 48,573,885 | 48,574,416 | 531   | Loss |
| DEL00033732 | chr4 | 48,617,274 | 48,617,857 | 583   | Loss |
| DEL00033735 | chr4 | 48,677,718 | 48,679,223 | 1,505 | Loss |
| DEL00033736 | chr4 | 48,704,559 | 48,704,781 | 222   | Loss |
| DEL00033745 | chr4 | 48,827,677 | 48,827,810 | 133   | Loss |
| DEL00033753 | chr4 | 48,946,817 | 48,947,016 | 199   | Loss |
| DEL00033756 | chr4 | 49,014,061 | 49,017,144 | 3,083 | Loss |
| DEL00033762 | chr4 | 49,089,290 | 49,089,430 | 140   | Loss |
| DEL00033765 | chr4 | 49,145,632 | 49,145,784 | 152   | Loss |
| DEL00033771 | chr4 | 49,237,781 | 49,243,275 | 5,494 | Loss |
| DEL00033785 | chr4 | 49,322,376 | 49,322,497 | 121   | Loss |
| DEL00033793 | chr4 | 49,536,602 | 49,537,288 | 686   | Loss |
| DEL00033800 | chr4 | 49,583,217 | 49,583,305 | 88    | Loss |
| DEL00033807 | chr4 | 49,733,795 | 49,733,960 | 165   | Loss |
| DEL00033810 | chr4 | 49,820,196 | 49,820,482 | 286   | Loss |
| DEL00033815 | chr4 | 49,902,117 | 49,902,191 | 74    | Loss |
| DEL00033817 | chr4 | 49,952,588 | 49,952,671 | 83    | Loss |
| DEL00033830 | chr4 | 50,102,017 | 50,102,088 | 71    | Loss |
| DEL00033834 | chr4 | 50,149,589 | 50,149,987 | 398   | Loss |
| DEL00033835 | chr4 | 50,155,310 | 50,155,748 | 438   | Loss |
| DEL00033845 | chr4 | 50,306,836 | 50,306,917 | 81    | Loss |
| DEL00033847 | chr4 | 50,345,696 | 50,345,841 | 145   | Loss |
| DEL00033858 | chr4 | 50,452,663 | 50,452,728 | 65    | Loss |
| DEL00033859 | chr4 | 50,471,019 | 50,471,168 | 149   | Loss |
| DEL00033860 | chr4 | 50,494,346 | 50,498,968 | 4,622 | Loss |
| DEL00033868 | chr4 | 50,579,505 | 50,579,779 | 274   | Loss |
| DEL00033870 | chr4 | 50,597,254 | 50,597,351 | 97    | Loss |
| DEL00033872 | chr4 | 50,648,543 | 50,649,065 | 522   | Loss |
| DEL00033879 | chr4 | 50,749,613 | 50,749,702 | 89    | Loss |
| DEL00033884 | chr4 | 50,787,587 | 50,787,998 | 411   | Loss |
| DEL00033886 | chr4 | 50,814,516 | 50,814,573 | 57    | Loss |
| DEL00033887 | chr4 | 50,823,934 | 50,824,001 | 67    | Loss |
| DEL00033892 | chr4 | 50,860,482 | 50,861,442 | 960   | Loss |
| DEL00033898 | chr4 | 51,003,229 | 51,003,315 | 86    | Loss |
| DEL00033899 | chr4 | 51,023,622 | 51,024,077 | 455   | Loss |
| DEL00033904 | chr4 | 51,133,203 | 51,135,344 | 2,141 | Loss |
| DEL00033905 | chr4 | 51,140,361 | 51,140,775 | 414   | Loss |
| DEL00033910 | chr4 | 51,183,648 | 51,183,976 | 328   | Loss |
| DEL00033911 | chr4 | 51,229,606 | 51,229,667 | 61    | Loss |
| DEL00033912 | chr4 | 51,300,127 | 51,300,259 | 132   | Loss |
| DEL00033919 | chr4 | 51,494,581 | 51,494,635 | 54    | Loss |
| DEL00033920 | chr4 | 51,497,816 | 51,497,931 | 115   | Loss |



|             |      |            |            |        |      |
|-------------|------|------------|------------|--------|------|
| DEL00033925 | chr4 | 51,588,668 | 51,589,128 | 460    | Loss |
| DEL00033927 | chr4 | 51,599,438 | 51,599,603 | 165    | Loss |
| DEL00033929 | chr4 | 51,638,251 | 51,638,734 | 483    | Loss |
| DEL00033933 | chr4 | 51,722,862 | 51,722,933 | 71     | Loss |
| DEL00033935 | chr4 | 51,734,410 | 51,734,731 | 321    | Loss |
| DEL00033938 | chr4 | 51,789,118 | 51,789,201 | 83     | Loss |
| DEL00033942 | chr4 | 51,849,052 | 51,849,156 | 104    | Loss |
| DEL00033944 | chr4 | 51,853,119 | 51,853,751 | 632    | Loss |
| DEL00033946 | chr4 | 51,923,736 | 51,923,853 | 117    | Loss |
| DUP00033954 | chr4 | 51,961,615 | 51,961,719 | 104    | Gain |
| DEL00033956 | chr4 | 51,969,731 | 51,969,791 | 60     | Loss |
| DEL00033962 | chr4 | 52,055,896 | 52,055,961 | 65     | Loss |
| DEL00033972 | chr4 | 52,146,746 | 52,146,824 | 78     | Loss |
| DEL00033973 | chr4 | 52,164,571 | 52,164,918 | 347    | Loss |
| DEL00033974 | chr4 | 52,170,169 | 52,171,053 | 884    | Loss |
| DEL00034002 | chr4 | 52,717,309 | 52,717,444 | 135    | Loss |
| DEL00034006 | chr4 | 52,861,905 | 52,862,956 | 1,051  | Loss |
| DEL00034012 | chr4 | 52,918,169 | 52,918,839 | 670    | Loss |
| DEL00034013 | chr4 | 52,959,230 | 52,959,290 | 60     | Loss |
| DEL00034021 | chr4 | 53,235,345 | 53,235,397 | 52     | Loss |
| DEL00034023 | chr4 | 53,285,119 | 53,285,176 | 57     | Loss |
| DEL00034027 | chr4 | 53,385,421 | 53,385,951 | 530    | Loss |
| DEL00034031 | chr4 | 53,451,779 | 53,451,903 | 124    | Loss |
| DEL00034039 | chr4 | 53,582,440 | 53,582,990 | 550    | Loss |
| DEL00034040 | chr4 | 53,604,508 | 53,604,686 | 178    | Loss |
| DEL00034049 | chr4 | 53,813,893 | 53,814,004 | 111    | Loss |
| DEL00034053 | chr4 | 53,845,388 | 53,845,455 | 67     | Loss |
| DEL00034056 | chr4 | 53,904,730 | 53,905,231 | 501    | Loss |
| DEL00034068 | chr4 | 54,167,041 | 54,167,590 | 549    | Loss |
| DEL00034069 | chr4 | 54,169,995 | 54,170,046 | 51     | Loss |
| DEL00034071 | chr4 | 54,225,475 | 54,226,172 | 697    | Loss |
| DEL00034078 | chr4 | 54,312,564 | 54,312,786 | 222    | Loss |
| DEL00034079 | chr4 | 54,323,309 | 54,325,443 | 2,134  | Loss |
| DEL00034084 | chr4 | 54,382,742 | 54,382,851 | 109    | Loss |
| DEL00034088 | chr4 | 54,391,803 | 54,391,923 | 120    | Loss |
| DEL00034089 | chr4 | 54,416,860 | 54,417,260 | 400    | Loss |
| DEL00034090 | chr4 | 54,435,476 | 54,435,636 | 160    | Loss |
| DEL00034094 | chr4 | 54,507,981 | 54,508,672 | 691    | Loss |
| DEL00034101 | chr4 | 54,575,501 | 54,575,606 | 105    | Loss |
| DEL00034107 | chr4 | 54,757,970 | 54,758,022 | 52     | Loss |
| DEL00034109 | chr4 | 54,758,418 | 54,758,648 | 230    | Loss |
| DEL00034110 | chr4 | 54,831,025 | 54,831,126 | 101    | Loss |
| DEL00034111 | chr4 | 54,848,760 | 54,848,872 | 112    | Loss |
| DEL00034113 | chr4 | 54,864,360 | 54,864,421 | 61     | Loss |
| DEL00034114 | chr4 | 54,923,398 | 54,923,501 | 103    | Loss |
| DUP00034118 | chr4 | 55,055,228 | 55,068,701 | 13,473 | Gain |
| DEL00034125 | chr4 | 55,127,108 | 55,128,562 | 1,454  | Loss |
| DEL00034131 | chr4 | 55,177,708 | 55,177,785 | 77     | Loss |
| DEL00034133 | chr4 | 55,187,150 | 55,188,160 | 1,010  | Loss |

|             |      |            |            |       |      |
|-------------|------|------------|------------|-------|------|
| DEL00034138 | chr4 | 55,235,272 | 55,241,105 | 5,833 | Loss |
| DEL00034143 | chr4 | 55,363,640 | 55,363,935 | 295   | Loss |
| DEL00034144 | chr4 | 55,434,952 | 55,435,412 | 460   | Loss |
| DEL00034165 | chr4 | 55,887,456 | 55,887,863 | 407   | Loss |
| DEL00034178 | chr4 | 56,075,376 | 56,076,105 | 729   | Loss |
| DEL00034179 | chr4 | 56,088,376 | 56,088,483 | 107   | Loss |
| DEL00034180 | chr4 | 56,111,171 | 56,111,990 | 819   | Loss |
| DEL00034183 | chr4 | 56,126,916 | 56,127,369 | 453   | Loss |
| DEL00034185 | chr4 | 56,157,549 | 56,157,638 | 89    | Loss |
| DEL00034189 | chr4 | 56,188,910 | 56,189,005 | 95    | Loss |
| DEL00034194 | chr4 | 56,234,599 | 56,235,139 | 540   | Loss |
| DEL00034196 | chr4 | 56,237,631 | 56,237,741 | 110   | Loss |
| DEL00034197 | chr4 | 56,260,120 | 56,260,730 | 610   | Loss |
| DEL00034205 | chr4 | 56,537,003 | 56,539,872 | 2,869 | Loss |
| DEL00034207 | chr4 | 56,564,402 | 56,564,455 | 53    | Loss |
| DEL00034218 | chr4 | 56,820,118 | 56,820,347 | 229   | Loss |
| DEL00034225 | chr4 | 56,929,915 | 56,930,160 | 245   | Loss |
| DEL00034232 | chr4 | 57,052,906 | 57,053,063 | 157   | Loss |
| DEL00034238 | chr4 | 57,193,963 | 57,194,039 | 76    | Loss |
| DEL00034240 | chr4 | 57,196,998 | 57,197,565 | 567   | Loss |
| DEL00034242 | chr4 | 57,256,182 | 57,256,316 | 134   | Loss |
| DEL00034247 | chr4 | 57,360,935 | 57,361,000 | 65    | Loss |
| DEL00034248 | chr4 | 57,387,015 | 57,387,772 | 757   | Loss |
| DEL00034249 | chr4 | 57,390,456 | 57,390,535 | 79    | Loss |
| DEL00034252 | chr4 | 57,450,635 | 57,450,701 | 66    | Loss |
| DEL00034259 | chr4 | 57,659,864 | 57,660,047 | 183   | Loss |
| DEL00034267 | chr4 | 57,757,331 | 57,757,896 | 565   | Loss |
| DEL00034271 | chr4 | 57,827,007 | 57,828,231 | 1,224 | Loss |
| DEL00034273 | chr4 | 57,863,070 | 57,863,623 | 553   | Loss |
| DEL00034278 | chr4 | 57,925,969 | 57,926,525 | 556   | Loss |
| DEL00034282 | chr4 | 57,971,158 | 57,971,445 | 287   | Loss |
| DEL00034285 | chr4 | 58,032,240 | 58,032,731 | 491   | Loss |
| DEL00034287 | chr4 | 58,080,051 | 58,080,189 | 138   | Loss |
| DUP00034294 | chr4 | 58,199,124 | 58,199,214 | 90    | Gain |
| DEL00034300 | chr4 | 58,352,618 | 58,352,673 | 55    | Loss |
| DEL00034316 | chr4 | 58,626,261 | 58,626,642 | 381   | Loss |
| DEL00034339 | chr4 | 59,017,736 | 59,018,116 | 380   | Loss |
| DEL00034340 | chr4 | 59,032,069 | 59,035,991 | 3,922 | Loss |
| DEL00034341 | chr4 | 59,080,055 | 59,080,175 | 120   | Loss |
| DEL00034342 | chr4 | 59,114,332 | 59,115,004 | 672   | Loss |
| DEL00034343 | chr4 | 59,115,051 | 59,115,518 | 467   | Loss |
| DEL00034344 | chr4 | 59,130,218 | 59,130,806 | 588   | Loss |
| DEL00034348 | chr4 | 59,186,651 | 59,187,836 | 1,185 | Loss |
| DEL00034352 | chr4 | 59,316,423 | 59,316,502 | 79    | Loss |
| DEL00034356 | chr4 | 59,369,648 | 59,369,721 | 73    | Loss |
| DEL00034357 | chr4 | 59,399,766 | 59,399,870 | 104   | Loss |
| DEL00034362 | chr4 | 59,438,952 | 59,439,033 | 81    | Loss |
| DEL00034369 | chr4 | 59,491,422 | 59,491,545 | 123   | Loss |
| DEL00034370 | chr4 | 59,503,592 | 59,503,671 | 79    | Loss |

|             |      |            |            |       |      |
|-------------|------|------------|------------|-------|------|
| DEL00034371 | chr4 | 59,506,365 | 59,509,142 | 2,777 | Loss |
| DEL00034372 | chr4 | 59,515,479 | 59,515,590 | 111   | Loss |
| DEL00034379 | chr4 | 59,579,489 | 59,579,709 | 220   | Loss |
| DEL00034383 | chr4 | 59,663,770 | 59,663,822 | 52    | Loss |
| DEL00034384 | chr4 | 59,667,192 | 59,667,409 | 217   | Loss |
| DEL00034387 | chr4 | 59,766,737 | 59,766,846 | 109   | Loss |
| DEL00034400 | chr4 | 59,868,039 | 59,868,269 | 230   | Loss |
| DEL00034407 | chr4 | 59,937,513 | 59,938,855 | 1,342 | Loss |
| DEL00034408 | chr4 | 59,954,476 | 59,954,550 | 74    | Loss |
| DEL00034409 | chr4 | 59,954,887 | 59,955,383 | 496   | Loss |
| DEL00034412 | chr4 | 59,978,243 | 59,978,323 | 80    | Loss |
| DEL00034413 | chr4 | 59,980,109 | 59,980,365 | 256   | Loss |
| DEL00034415 | chr4 | 60,034,628 | 60,034,704 | 76    | Loss |
| DEL00034419 | chr4 | 60,089,893 | 60,089,960 | 67    | Loss |
| DEL00034420 | chr4 | 60,129,749 | 60,129,868 | 119   | Loss |
| DEL00034424 | chr4 | 60,245,527 | 60,245,587 | 60    | Loss |
| DEL00034428 | chr4 | 60,286,080 | 60,286,757 | 677   | Loss |
| DEL00034436 | chr4 | 60,431,278 | 60,431,542 | 264   | Loss |
| DEL00034437 | chr4 | 60,483,858 | 60,484,012 | 154   | Loss |
| DEL00034439 | chr4 | 60,486,702 | 60,486,890 | 188   | Loss |
| DEL00034441 | chr4 | 60,589,340 | 60,589,417 | 77    | Loss |
| DEL00034460 | chr4 | 60,862,408 | 60,862,972 | 564   | Loss |
| DEL00034471 | chr4 | 61,020,567 | 61,020,670 | 103   | Loss |
| DEL00034474 | chr4 | 61,080,531 | 61,081,948 | 1,417 | Loss |
| DEL00034480 | chr4 | 61,147,084 | 61,148,216 | 1,132 | Loss |
| DEL00034484 | chr4 | 61,230,367 | 61,230,426 | 59    | Loss |
| DEL00034487 | chr4 | 61,258,733 | 61,258,981 | 248   | Loss |
| DEL00034489 | chr4 | 61,275,085 | 61,275,171 | 86    | Loss |
| DEL00034492 | chr4 | 61,394,926 | 61,395,846 | 920   | Loss |
| DEL00034495 | chr4 | 61,413,463 | 61,413,609 | 146   | Loss |
| DEL00034496 | chr4 | 61,414,351 | 61,414,583 | 232   | Loss |
| DEL00034502 | chr4 | 61,476,602 | 61,477,529 | 927   | Loss |
| DEL00034503 | chr4 | 61,479,590 | 61,479,662 | 72    | Loss |
| DEL00034514 | chr4 | 61,728,930 | 61,728,982 | 52    | Loss |
| DEL00034516 | chr4 | 61,750,190 | 61,750,656 | 466   | Loss |
| DEL00034517 | chr4 | 61,775,775 | 61,775,830 | 55    | Loss |
| DEL00034521 | chr4 | 61,798,704 | 61,798,921 | 217   | Loss |
| DEL00034522 | chr4 | 61,806,305 | 61,806,906 | 601   | Loss |
| DEL00034524 | chr4 | 61,885,147 | 61,885,210 | 63    | Loss |
| DEL00034534 | chr4 | 62,074,197 | 62,074,278 | 81    | Loss |
| DEL00034539 | chr4 | 62,116,654 | 62,116,762 | 108   | Loss |
| DEL00034541 | chr4 | 62,166,402 | 62,166,569 | 167   | Loss |
| DEL00034545 | chr4 | 62,248,848 | 62,248,908 | 60    | Loss |
| DEL00034552 | chr4 | 62,338,984 | 62,339,037 | 53    | Loss |
| DEL00034554 | chr4 | 62,353,059 | 62,353,470 | 411   | Loss |
| DEL00034562 | chr4 | 62,405,197 | 62,405,492 | 295   | Loss |
| DEL00034571 | chr4 | 62,529,528 | 62,529,713 | 185   | Loss |
| DEL00034573 | chr4 | 62,555,218 | 62,555,366 | 148   | Loss |
| DEL00034580 | chr4 | 62,681,688 | 62,681,794 | 106   | Loss |

|             |      |            |            |       |       |
|-------------|------|------------|------------|-------|-------|
| DEL00034581 | chr4 | 62,690,032 | 62,690,086 | 54    | Loss  |
| DEL00034586 | chr4 | 62,897,111 | 62,897,214 | 103   | Loss  |
| DEL00034589 | chr4 | 62,920,823 | 62,921,048 | 225   | Loss  |
| DEL00034595 | chr4 | 62,934,482 | 62,934,757 | 275   | Loss  |
| DEL00034596 | chr4 | 62,946,981 | 62,954,714 | 7,733 | Mixed |
| DEL00034605 | chr4 | 63,044,338 | 63,044,464 | 126   | Loss  |
| DEL00034609 | chr4 | 63,143,553 | 63,143,635 | 82    | Loss  |
| DEL00034610 | chr4 | 63,159,067 | 63,159,157 | 90    | Loss  |
| DUP00034621 | chr4 | 63,361,998 | 63,362,110 | 112   | Gain  |
| DEL00034625 | chr4 | 63,452,221 | 63,452,433 | 212   | Loss  |
| DEL00034626 | chr4 | 63,452,609 | 63,452,660 | 51    | Loss  |
| DEL00034627 | chr4 | 63,486,985 | 63,487,514 | 529   | Loss  |
| DEL00034632 | chr4 | 63,580,876 | 63,583,194 | 2,318 | Loss  |
| DEL00034635 | chr4 | 63,603,862 | 63,607,448 | 3,586 | Loss  |
| DEL00034639 | chr4 | 63,634,908 | 63,634,993 | 85    | Loss  |
| DEL00034644 | chr4 | 63,698,060 | 63,702,288 | 4,228 | Loss  |
| DUP00034648 | chr4 | 63,720,047 | 63,720,177 | 130   | Gain  |
| DEL00034650 | chr4 | 63,771,770 | 63,771,835 | 65    | Loss  |
| DEL00034651 | chr4 | 63,776,880 | 63,783,424 | 6,544 | Loss  |
| DEL00034655 | chr4 | 63,820,141 | 63,820,223 | 82    | Loss  |
| DEL00034656 | chr4 | 63,829,073 | 63,829,137 | 64    | Loss  |
| DEL00034658 | chr4 | 63,886,938 | 63,889,243 | 2,305 | Loss  |
| DEL00034659 | chr4 | 63,955,831 | 63,956,026 | 195   | Loss  |
| DEL00034663 | chr4 | 63,970,527 | 63,970,871 | 344   | Loss  |
| DEL00034664 | chr4 | 64,005,862 | 64,007,445 | 1,583 | Loss  |
| DEL00034665 | chr4 | 64,080,733 | 64,080,914 | 181   | Loss  |
| DEL00034666 | chr4 | 64,122,984 | 64,123,806 | 822   | Loss  |
| DEL00034667 | chr4 | 64,147,675 | 64,147,743 | 68    | Loss  |
| DEL00034669 | chr4 | 64,185,572 | 64,185,635 | 63    | Loss  |
| DEL00034673 | chr4 | 64,274,858 | 64,275,296 | 438   | Loss  |
| DEL00034674 | chr4 | 64,323,593 | 64,324,243 | 650   | Loss  |
| DEL00034683 | chr4 | 64,543,526 | 64,544,060 | 534   | Loss  |
| DEL00034687 | chr4 | 64,603,737 | 64,603,946 | 209   | Loss  |
| DEL00034688 | chr4 | 64,611,742 | 64,612,182 | 440   | Loss  |
| DEL00034691 | chr4 | 64,655,865 | 64,656,020 | 155   | Loss  |
| DEL00034707 | chr4 | 64,832,337 | 64,833,312 | 975   | Loss  |
| DEL00034712 | chr4 | 64,856,134 | 64,856,197 | 63    | Loss  |
| DEL00034717 | chr4 | 64,897,032 | 64,897,339 | 307   | Loss  |
| DEL00034725 | chr4 | 64,963,700 | 64,964,265 | 565   | Loss  |
| DEL00034728 | chr4 | 64,999,976 | 65,000,141 | 165   | Loss  |
| DEL00034729 | chr4 | 65,027,397 | 65,027,773 | 376   | Loss  |
| DEL00034731 | chr4 | 65,054,607 | 65,054,711 | 104   | Loss  |
| DEL00034732 | chr4 | 65,110,292 | 65,110,462 | 170   | Loss  |
| DEL00034745 | chr4 | 65,468,178 | 65,468,290 | 112   | Loss  |
| DEL00034747 | chr4 | 65,552,547 | 65,553,067 | 520   | Loss  |
| DEL00034750 | chr4 | 65,636,823 | 65,637,899 | 1,076 | Loss  |
| DEL00034754 | chr4 | 65,666,560 | 65,666,663 | 103   | Loss  |
| DEL00034760 | chr4 | 65,747,661 | 65,747,866 | 205   | Loss  |
| DEL00034767 | chr4 | 66,004,162 | 66,004,231 | 69    | Loss  |

|             |      |            |            |        |      |
|-------------|------|------------|------------|--------|------|
| DEL00034778 | chr4 | 66,210,538 | 66,210,604 | 66     | Loss |
| DEL00034789 | chr4 | 66,417,925 | 66,418,107 | 182    | Loss |
| DEL00034800 | chr4 | 66,487,786 | 66,487,843 | 57     | Loss |
| DEL00034806 | chr4 | 66,552,586 | 66,552,677 | 91     | Loss |
| DEL00034809 | chr4 | 66,621,816 | 66,621,909 | 93     | Loss |
| DEL00034811 | chr4 | 66,647,496 | 66,648,295 | 799    | Loss |
| DEL00034812 | chr4 | 66,675,667 | 66,675,956 | 289    | Loss |
| DEL00034815 | chr4 | 66,739,935 | 66,740,006 | 71     | Loss |
| DEL00034817 | chr4 | 66,752,542 | 66,752,670 | 128    | Loss |
| DEL00034823 | chr4 | 66,877,102 | 66,877,168 | 66     | Loss |
| DEL00034824 | chr4 | 66,991,858 | 66,993,102 | 1,244  | Loss |
| DEL00034828 | chr4 | 67,079,332 | 67,080,677 | 1,345  | Loss |
| DEL00034835 | chr4 | 67,186,483 | 67,187,693 | 1,210  | Loss |
| DEL00034837 | chr4 | 67,231,096 | 67,232,273 | 1,177  | Loss |
| DUP00034847 | chr4 | 67,392,386 | 67,392,516 | 130    | Gain |
| DEL00034853 | chr4 | 67,476,184 | 67,476,283 | 99     | Loss |
| DEL00034863 | chr4 | 67,584,214 | 67,587,651 | 3,437  | Loss |
| DEL00034864 | chr4 | 67,612,396 | 67,612,987 | 591    | Loss |
| DEL00034865 | chr4 | 67,618,444 | 67,618,577 | 133    | Loss |
| DEL00034867 | chr4 | 67,651,382 | 67,651,486 | 104    | Loss |
| DEL00034868 | chr4 | 67,652,239 | 67,652,297 | 58     | Loss |
| DEL00034873 | chr4 | 67,703,937 | 67,704,002 | 65     | Loss |
| DEL00034878 | chr4 | 67,765,109 | 67,765,727 | 618    | Loss |
| DEL00034879 | chr4 | 67,792,815 | 67,794,562 | 1,747  | Loss |
| DEL00034885 | chr4 | 67,889,281 | 67,889,417 | 136    | Loss |
| DEL00034888 | chr4 | 67,918,820 | 67,919,206 | 386    | Loss |
| DEL00034889 | chr4 | 67,924,804 | 67,924,912 | 108    | Loss |
| DEL00034892 | chr4 | 67,949,766 | 67,950,629 | 863    | Loss |
| DEL00034903 | chr4 | 68,039,132 | 68,039,438 | 306    | Loss |
| DEL00034904 | chr4 | 68,042,787 | 68,042,897 | 110    | Loss |
| DEL00034913 | chr4 | 68,210,277 | 68,210,436 | 159    | Loss |
| DEL00034916 | chr4 | 68,276,602 | 68,276,668 | 66     | Loss |
| DEL00034917 | chr4 | 68,312,457 | 68,312,596 | 139    | Loss |
| DEL00034927 | chr4 | 68,540,497 | 68,540,611 | 114    | Loss |
| DEL00034928 | chr4 | 68,541,662 | 68,541,719 | 57     | Loss |
| DEL00034933 | chr4 | 68,618,372 | 68,618,615 | 243    | Loss |
| DEL00034939 | chr4 | 68,686,586 | 68,686,697 | 111    | Loss |
| DEL00034942 | chr4 | 68,817,423 | 68,817,901 | 478    | Loss |
| DEL00034949 | chr4 | 68,921,435 | 68,921,660 | 225    | Loss |
| DEL00034956 | chr4 | 69,212,941 | 69,213,212 | 271    | Loss |
| DEL00034962 | chr4 | 69,312,612 | 69,313,371 | 759    | Loss |
| DEL00034967 | chr4 | 69,360,483 | 69,360,699 | 216    | Loss |
| DEL00034969 | chr4 | 69,374,745 | 69,375,127 | 382    | Loss |
| DEL00034975 | chr4 | 69,397,549 | 69,397,712 | 163    | Loss |
| DEL00034976 | chr4 | 69,421,411 | 69,421,672 | 261    | Loss |
| DEL00034978 | chr4 | 69,427,136 | 69,441,694 | 14,558 | Loss |
| DEL00034979 | chr4 | 69,454,269 | 69,454,329 | 60     | Loss |
| DEL00034982 | chr4 | 69,511,109 | 69,511,163 | 54     | Loss |
| DEL00034984 | chr4 | 69,558,980 | 69,559,264 | 284    | Loss |

|             |      |            |            |        |      |
|-------------|------|------------|------------|--------|------|
| DEL00034990 | chr4 | 69,608,355 | 69,608,607 | 252    | Loss |
| DEL00034994 | chr4 | 69,618,397 | 69,618,832 | 435    | Loss |
| DEL00034996 | chr4 | 69,689,954 | 69,690,419 | 465    | Loss |
| DEL00034998 | chr4 | 69,701,367 | 69,701,537 | 170    | Loss |
| DEL00035007 | chr4 | 70,033,331 | 70,033,431 | 100    | Loss |
| DEL00035015 | chr4 | 70,157,381 | 70,157,918 | 537    | Loss |
| DEL00035016 | chr4 | 70,205,691 | 70,205,749 | 58     | Loss |
| DEL00035021 | chr4 | 70,369,184 | 70,369,809 | 625    | Loss |
| DEL00035023 | chr4 | 70,402,812 | 70,402,985 | 173    | Loss |
| DEL00035025 | chr4 | 70,445,839 | 70,446,367 | 528    | Loss |
| DEL00035032 | chr4 | 70,630,356 | 70,630,426 | 70     | Loss |
| DEL00035033 | chr4 | 70,630,741 | 70,631,301 | 560    | Loss |
| DEL00035035 | chr4 | 70,681,542 | 70,681,610 | 68     | Loss |
| DEL00035039 | chr4 | 70,748,847 | 70,748,949 | 102    | Loss |
| DEL00035044 | chr4 | 70,802,775 | 70,803,096 | 321    | Loss |
| DUP00035045 | chr4 | 70,808,166 | 70,841,447 | 33,281 | Gain |
| DEL00035048 | chr4 | 70,883,925 | 70,884,754 | 829    | Loss |
| DEL00035050 | chr4 | 70,915,228 | 70,915,735 | 507    | Loss |
| DEL00035052 | chr4 | 70,921,705 | 70,921,760 | 55     | Loss |
| DEL00035054 | chr4 | 70,924,955 | 70,925,379 | 424    | Loss |
| DEL00035060 | chr4 | 70,985,053 | 70,985,113 | 60     | Loss |
| DEL00035067 | chr4 | 71,037,047 | 71,037,394 | 347    | Loss |
| DEL00035076 | chr4 | 71,097,966 | 71,099,449 | 1,483  | Loss |
| DEL00035077 | chr4 | 71,115,003 | 71,116,139 | 1,136  | Loss |
| DEL00035090 | chr4 | 71,189,471 | 71,189,961 | 490    | Loss |
| DEL00035096 | chr4 | 71,293,489 | 71,293,550 | 61     | Loss |
| DEL00035104 | chr4 | 71,572,723 | 71,575,322 | 2,599  | Loss |
| DEL00035106 | chr4 | 71,712,668 | 71,712,860 | 192    | Loss |
| DEL00035108 | chr4 | 71,763,610 | 71,764,530 | 920    | Loss |
| DEL00035109 | chr4 | 71,787,167 | 71,787,719 | 552    | Loss |
| DEL00035117 | chr4 | 71,899,613 | 71,900,634 | 1,021  | Loss |
| DEL00035119 | chr4 | 71,916,107 | 71,916,622 | 515    | Loss |
| DEL00035120 | chr4 | 71,934,255 | 71,934,779 | 524    | Loss |
| DEL00035123 | chr4 | 71,977,187 | 71,978,279 | 1,092  | Loss |
| DEL00035124 | chr4 | 71,979,461 | 71,979,960 | 499    | Loss |
| DEL00035131 | chr4 | 72,010,761 | 72,013,487 | 2,726  | Loss |
| DEL00035132 | chr4 | 72,014,146 | 72,014,267 | 121    | Loss |
| DEL00035140 | chr4 | 72,162,206 | 72,162,453 | 247    | Loss |
| DEL00035141 | chr4 | 72,180,872 | 72,184,313 | 3,441  | Loss |
| DEL00035143 | chr4 | 72,211,734 | 72,213,493 | 1,759  | Loss |
| DEL00035144 | chr4 | 72,237,368 | 72,237,460 | 92     | Loss |
| DEL00035148 | chr4 | 72,284,694 | 72,284,790 | 96     | Loss |
| DEL00035152 | chr4 | 72,328,673 | 72,329,509 | 836    | Loss |
| DEL00035162 | chr4 | 72,375,684 | 72,375,948 | 264    | Loss |
| DEL00035163 | chr4 | 72,422,277 | 72,423,295 | 1,018  | Loss |
| DEL00035168 | chr4 | 72,456,746 | 72,457,673 | 927    | Loss |
| DEL00035177 | chr4 | 72,648,173 | 72,648,292 | 119    | Loss |
| DEL00035179 | chr4 | 72,684,316 | 72,684,670 | 354    | Loss |
| DEL00035189 | chr4 | 73,057,789 | 73,057,960 | 171    | Loss |

|             |      |            |            |       |      |
|-------------|------|------------|------------|-------|------|
| DEL00035202 | chr4 | 73,252,817 | 73,253,203 | 386   | Loss |
| DEL00035208 | chr4 | 73,364,200 | 73,365,113 | 913   | Loss |
| DEL00035210 | chr4 | 73,385,157 | 73,385,225 | 68    | Loss |
| DEL00035214 | chr4 | 73,467,047 | 73,467,107 | 60    | Loss |
| DEL00035216 | chr4 | 73,485,743 | 73,485,802 | 59    | Loss |
| DEL00035235 | chr4 | 74,271,221 | 74,277,054 | 5,833 | Loss |
| DEL00035237 | chr4 | 74,304,343 | 74,304,455 | 112   | Loss |
| DEL00035240 | chr4 | 74,317,914 | 74,317,977 | 63    | Loss |
| DEL00035248 | chr4 | 74,465,032 | 74,465,361 | 329   | Loss |
| DEL00035252 | chr4 | 74,486,006 | 74,487,365 | 1,359 | Loss |
| DEL00035259 | chr4 | 74,637,355 | 74,637,518 | 163   | Loss |
| DEL00035263 | chr4 | 74,686,498 | 74,686,551 | 53    | Loss |
| DEL00035264 | chr4 | 74,733,769 | 74,733,829 | 60    | Loss |
| DEL00035266 | chr4 | 74,778,026 | 74,779,068 | 1,042 | Loss |
| DEL00035267 | chr4 | 74,780,481 | 74,780,713 | 232   | Loss |
| DEL00035271 | chr4 | 74,856,038 | 74,856,880 | 842   | Loss |
| DEL00035273 | chr4 | 74,883,781 | 74,883,833 | 52    | Loss |
| DEL00035281 | chr4 | 74,970,321 | 74,970,946 | 625   | Loss |
| DEL00035282 | chr4 | 74,986,725 | 74,987,294 | 569   | Loss |
| DEL00035283 | chr4 | 74,989,426 | 74,989,482 | 56    | Loss |
| DEL00035284 | chr4 | 74,990,253 | 74,991,576 | 1,323 | Loss |
| DEL00035291 | chr4 | 75,119,798 | 75,119,935 | 137   | Loss |
| DEL00035296 | chr4 | 75,229,697 | 75,230,434 | 737   | Loss |
| DEL00035297 | chr4 | 75,236,052 | 75,236,123 | 71    | Loss |
| DEL00035301 | chr4 | 75,264,886 | 75,264,989 | 103   | Loss |
| DEL00035305 | chr4 | 75,306,951 | 75,307,113 | 162   | Loss |
| DEL00035311 | chr4 | 75,429,881 | 75,430,509 | 628   | Loss |
| DEL00035312 | chr4 | 75,441,056 | 75,441,623 | 567   | Loss |
| DEL00035316 | chr4 | 75,485,034 | 75,485,270 | 236   | Loss |
| DEL00035322 | chr4 | 75,599,254 | 75,599,363 | 109   | Loss |
| DEL00035324 | chr4 | 75,662,528 | 75,662,600 | 72    | Loss |
| DEL00035330 | chr4 | 75,752,612 | 75,752,689 | 77    | Loss |
| DEL00035334 | chr4 | 75,821,071 | 75,821,182 | 111   | Loss |
| DEL00035336 | chr4 | 75,882,077 | 75,882,619 | 542   | Loss |
| DEL00035339 | chr4 | 76,019,681 | 76,020,779 | 1,098 | Loss |
| DEL00035343 | chr4 | 76,060,249 | 76,060,706 | 457   | Loss |
| DEL00035346 | chr4 | 76,134,275 | 76,134,807 | 532   | Loss |
| DEL00035351 | chr4 | 76,183,789 | 76,183,854 | 65    | Loss |
| DEL00035363 | chr4 | 76,470,602 | 76,470,797 | 195   | Loss |
| DEL00035368 | chr4 | 76,519,477 | 76,519,568 | 91    | Loss |
| DEL00035376 | chr4 | 76,648,801 | 76,649,573 | 772   | Loss |
| DEL00035378 | chr4 | 76,690,731 | 76,690,822 | 91    | Loss |
| DEL00035379 | chr4 | 76,702,342 | 76,702,542 | 200   | Loss |
| DEL00035380 | chr4 | 76,708,087 | 76,708,184 | 97    | Loss |
| DEL00035385 | chr4 | 76,769,987 | 76,770,083 | 96    | Loss |
| DEL00035386 | chr4 | 76,785,225 | 76,785,289 | 64    | Loss |
| DEL00035389 | chr4 | 76,874,611 | 76,874,682 | 71    | Loss |
| DEL00035395 | chr4 | 77,018,277 | 77,018,888 | 611   | Loss |
| DEL00035404 | chr4 | 77,124,281 | 77,124,469 | 188   | Loss |

|             |      |            |            |       |      |
|-------------|------|------------|------------|-------|------|
| DEL00035417 | chr4 | 77,350,871 | 77,351,341 | 470   | Loss |
| DEL00035424 | chr4 | 77,470,124 | 77,471,168 | 1,044 | Loss |
| DEL00035425 | chr4 | 77,492,948 | 77,493,042 | 94    | Loss |
| DEL00035426 | chr4 | 77,520,405 | 77,520,458 | 53    | Loss |
| DEL00035434 | chr4 | 77,616,065 | 77,616,556 | 491   | Loss |
| DEL00035435 | chr4 | 77,625,942 | 77,626,401 | 459   | Loss |
| DEL00035445 | chr4 | 77,805,878 | 77,808,198 | 2,320 | Loss |
| DEL00035446 | chr4 | 77,813,890 | 77,813,963 | 73    | Loss |
| DEL00035448 | chr4 | 77,836,529 | 77,836,682 | 153   | Loss |
| DEL00035449 | chr4 | 77,868,880 | 77,869,207 | 327   | Loss |
| DEL00035454 | chr4 | 77,993,376 | 77,993,455 | 79    | Loss |
| DEL00035455 | chr4 | 78,036,167 | 78,036,585 | 418   | Loss |
| DEL00035457 | chr4 | 78,042,741 | 78,042,952 | 211   | Loss |
| DEL00035459 | chr4 | 78,096,261 | 78,096,375 | 114   | Loss |
| DEL00035461 | chr4 | 78,224,214 | 78,224,285 | 71    | Loss |
| DEL00035462 | chr4 | 78,259,320 | 78,259,428 | 108   | Loss |
| DEL00035463 | chr4 | 78,287,525 | 78,287,577 | 52    | Loss |
| DEL00035467 | chr4 | 78,472,993 | 78,473,174 | 181   | Loss |
| DEL00035471 | chr4 | 78,488,716 | 78,489,077 | 361   | Loss |
| DEL00035480 | chr4 | 78,561,199 | 78,561,473 | 274   | Loss |
| DEL00035488 | chr4 | 78,765,902 | 78,766,997 | 1,095 | Loss |
| DEL00035492 | chr4 | 78,806,240 | 78,806,749 | 509   | Loss |
| DEL00035510 | chr4 | 79,105,077 | 79,105,181 | 104   | Loss |
| DUP00035517 | chr4 | 79,238,407 | 79,238,537 | 130   | Gain |
| DEL00035520 | chr4 | 79,254,516 | 79,254,708 | 192   | Loss |
| DEL00035524 | chr4 | 79,275,073 | 79,275,211 | 138   | Loss |
| DEL00035525 | chr4 | 79,290,795 | 79,291,324 | 529   | Loss |
| DEL00035532 | chr4 | 79,347,314 | 79,347,742 | 428   | Loss |
| DEL00035533 | chr4 | 79,353,993 | 79,354,455 | 462   | Loss |
| DEL00035538 | chr4 | 79,387,846 | 79,387,953 | 107   | Loss |
| DEL00035539 | chr4 | 79,393,640 | 79,393,820 | 180   | Loss |
| DEL00035548 | chr4 | 79,555,800 | 79,555,855 | 55    | Loss |
| DEL00035551 | chr4 | 79,611,601 | 79,612,159 | 558   | Loss |
| DEL00035554 | chr4 | 79,658,538 | 79,658,592 | 54    | Loss |
| DEL00035563 | chr4 | 79,823,732 | 79,823,829 | 97    | Loss |
| DEL00035565 | chr4 | 79,830,224 | 79,830,324 | 100   | Loss |
| DEL00035572 | chr4 | 80,038,088 | 80,039,067 | 979   | Loss |
| DEL00035574 | chr4 | 80,116,419 | 80,116,505 | 86    | Loss |
| DEL00035576 | chr4 | 80,123,764 | 80,124,004 | 240   | Loss |
| DEL00035577 | chr4 | 80,136,513 | 80,136,682 | 169   | Loss |
| DEL00035578 | chr4 | 80,144,379 | 80,145,908 | 1,529 | Loss |
| DEL00035581 | chr4 | 80,204,389 | 80,204,583 | 194   | Loss |
| DEL00035583 | chr4 | 80,207,671 | 80,208,305 | 634   | Loss |
| DEL00035587 | chr4 | 80,277,684 | 80,277,736 | 52    | Loss |
| DEL00035594 | chr4 | 80,366,577 | 80,366,726 | 149   | Loss |
| DEL00035611 | chr4 | 80,638,662 | 80,638,745 | 83    | Loss |
| DUP00035615 | chr4 | 80,687,438 | 80,687,532 | 94    | Gain |
| DEL00035620 | chr4 | 80,795,866 | 80,796,292 | 426   | Loss |
| DEL00035621 | chr4 | 80,802,896 | 80,803,009 | 113   | Loss |



|             |      |            |            |       |      |
|-------------|------|------------|------------|-------|------|
| DEL00035623 | chr4 | 80,813,699 | 80,813,843 | 144   | Loss |
| DEL00035625 | chr4 | 80,834,812 | 80,834,891 | 79    | Loss |
| DEL00035628 | chr4 | 80,901,833 | 80,902,119 | 286   | Loss |
| DEL00035642 | chr4 | 81,099,990 | 81,100,897 | 907   | Loss |
| DEL00035645 | chr4 | 81,165,234 | 81,165,962 | 728   | Loss |
| DEL00035655 | chr4 | 81,245,234 | 81,245,598 | 364   | Loss |
| DEL00035665 | chr4 | 81,321,746 | 81,321,809 | 63    | Loss |
| DEL00035668 | chr4 | 81,415,729 | 81,417,101 | 1,372 | Loss |
| DEL00035669 | chr4 | 81,429,005 | 81,430,070 | 1,065 | Loss |
| DEL00035675 | chr4 | 81,493,680 | 81,493,745 | 65    | Loss |
| DEL00035679 | chr4 | 81,601,210 | 81,601,261 | 51    | Loss |
| DEL00035680 | chr4 | 81,611,878 | 81,612,400 | 522   | Loss |
| DEL00035697 | chr4 | 81,925,273 | 81,925,379 | 106   | Loss |
| DEL00035705 | chr4 | 81,999,452 | 81,999,554 | 102   | Loss |
| DEL00035706 | chr4 | 82,009,722 | 82,010,662 | 940   | Loss |
| DUP00035709 | chr4 | 82,109,779 | 82,110,781 | 1,002 | Gain |
| DEL00035710 | chr4 | 82,113,385 | 82,113,453 | 68    | Loss |
| DEL00035715 | chr4 | 82,209,377 | 82,209,631 | 254   | Loss |
| DEL00035716 | chr4 | 82,222,600 | 82,222,879 | 279   | Loss |
| DEL00035719 | chr4 | 82,254,506 | 82,254,586 | 80    | Loss |
| DEL00035722 | chr4 | 82,288,902 | 82,289,108 | 206   | Loss |
| DEL00035725 | chr4 | 82,344,555 | 82,344,760 | 205   | Loss |
| DEL00035729 | chr4 | 82,431,174 | 82,431,408 | 234   | Loss |
| DEL00035731 | chr4 | 82,464,637 | 82,464,699 | 62    | Loss |
| DEL00035734 | chr4 | 82,488,381 | 82,488,531 | 150   | Loss |
| DEL00035738 | chr4 | 82,548,250 | 82,548,621 | 371   | Loss |
| DEL00035741 | chr4 | 82,575,524 | 82,575,729 | 205   | Loss |
| DEL00035742 | chr4 | 82,667,478 | 82,667,565 | 87    | Loss |
| DEL00035746 | chr4 | 82,724,087 | 82,724,637 | 550   | Loss |
| DEL00035748 | chr4 | 82,741,722 | 82,742,035 | 313   | Loss |
| DEL00035749 | chr4 | 82,778,215 | 82,784,048 | 5,833 | Loss |
| DEL00035753 | chr4 | 82,846,889 | 82,846,950 | 61    | Loss |
| DEL00035756 | chr4 | 82,884,689 | 82,884,913 | 224   | Loss |
| DEL00035763 | chr4 | 82,968,190 | 82,968,737 | 547   | Loss |
| DEL00035769 | chr4 | 83,076,720 | 83,076,868 | 148   | Loss |
| DEL00035779 | chr4 | 83,502,716 | 83,502,767 | 51    | Loss |
| DEL00035780 | chr4 | 83,508,451 | 83,508,514 | 63    | Loss |
| DEL00035782 | chr4 | 83,527,675 | 83,528,072 | 397   | Loss |
| DEL00035784 | chr4 | 83,536,383 | 83,536,490 | 107   | Loss |
| DUP00035787 | chr4 | 83,592,377 | 83,592,529 | 152   | Gain |
| DEL00035788 | chr4 | 83,595,533 | 83,595,586 | 53    | Loss |
| DEL00035789 | chr4 | 83,603,955 | 83,604,066 | 111   | Loss |
| DEL00035791 | chr4 | 83,645,936 | 83,647,072 | 1,136 | Loss |
| DUP00035801 | chr4 | 83,735,198 | 83,735,877 | 679   | Gain |
| DEL00035804 | chr4 | 83,766,747 | 83,766,812 | 65    | Loss |
| DEL00035806 | chr4 | 83,783,091 | 83,783,159 | 68    | Loss |
| DEL00035808 | chr4 | 83,808,073 | 83,808,346 | 273   | Loss |
| DEL00035814 | chr4 | 83,913,204 | 83,913,320 | 116   | Loss |
| DEL00035817 | chr4 | 83,935,892 | 83,936,518 | 626   | Loss |

|             |      |            |            |         |       |
|-------------|------|------------|------------|---------|-------|
| DEL00035820 | chr4 | 83,951,664 | 83,951,761 | 97      | Loss  |
| DEL00035831 | chr4 | 84,177,769 | 84,178,246 | 477     | Loss  |
| DEL00035834 | chr4 | 84,187,340 | 84,187,656 | 316     | Loss  |
| DEL00035845 | chr4 | 84,233,520 | 84,233,976 | 456     | Loss  |
| DEL00035853 | chr4 | 84,237,363 | 84,237,792 | 429     | Loss  |
| DEL00035854 | chr4 | 84,267,104 | 84,267,482 | 378     | Loss  |
| DEL00035861 | chr4 | 84,310,961 | 84,311,521 | 560     | Loss  |
| DEL00035863 | chr4 | 84,317,520 | 84,318,124 | 604     | Loss  |
| DEL00035869 | chr4 | 84,357,821 | 84,357,886 | 65      | Loss  |
| DEL00035882 | chr4 | 84,555,585 | 84,555,669 | 84      | Loss  |
| DEL00035883 | chr4 | 84,560,072 | 84,560,135 | 63      | Loss  |
| DEL00035890 | chr4 | 84,784,885 | 84,785,085 | 200     | Loss  |
| DEL00035895 | chr4 | 84,824,228 | 84,825,082 | 854     | Loss  |
| DEL00035896 | chr4 | 84,913,210 | 84,913,346 | 136     | Loss  |
| DEL00035904 | chr4 | 85,071,591 | 85,072,179 | 588     | Loss  |
| DEL00035912 | chr4 | 85,099,403 | 85,099,627 | 224     | Loss  |
| DEL00035917 | chr4 | 85,198,854 | 85,198,942 | 88      | Loss  |
| DUP00035918 | chr4 | 85,203,669 | 85,205,350 | 1,681   | Gain  |
| DEL00035926 | chr4 | 85,285,115 | 85,285,192 | 77      | Loss  |
| DEL00035938 | chr4 | 85,487,672 | 85,487,962 | 290     | Loss  |
| DUP00035953 | chr4 | 85,530,517 | 85,634,812 | 104,295 | Mixed |
| DUP00036500 | chr4 | 85,642,797 | 85,677,630 | 34,833  | Mixed |
| DEL00036585 | chr4 | 85,683,821 | 85,688,785 | 4,964   | Loss  |
| DEL00036593 | chr4 | 85,729,201 | 85,729,475 | 274     | Loss  |
| DEL00036594 | chr4 | 85,741,347 | 85,742,220 | 873     | Loss  |
| DEL00036595 | chr4 | 85,751,766 | 85,752,234 | 468     | Loss  |
| DEL00036597 | chr4 | 85,765,749 | 85,766,062 | 313     | Loss  |
| DEL00036599 | chr4 | 85,792,247 | 85,792,771 | 524     | Loss  |
| DEL00036611 | chr4 | 85,923,636 | 85,923,698 | 62      | Loss  |
| DEL00036618 | chr4 | 85,982,225 | 85,982,440 | 215     | Loss  |
| DEL00036619 | chr4 | 85,989,335 | 85,989,423 | 88      | Loss  |
| DEL00036620 | chr4 | 85,989,902 | 85,989,976 | 74      | Loss  |
| DEL00036627 | chr4 | 86,023,306 | 86,023,423 | 117     | Loss  |
| DEL00036630 | chr4 | 86,059,122 | 86,059,735 | 613     | Loss  |
| DEL00036645 | chr4 | 86,235,945 | 86,284,008 | 48,063  | Loss  |
| DEL00036655 | chr4 | 86,287,577 | 86,287,661 | 84      | Loss  |
| DEL00036659 | chr4 | 86,339,743 | 86,340,114 | 371     | Loss  |
| DEL00036662 | chr4 | 86,359,934 | 86,361,037 | 1,103   | Loss  |
| DEL00036664 | chr4 | 86,400,889 | 86,401,294 | 405     | Loss  |
| DEL00036667 | chr4 | 86,429,857 | 86,429,912 | 55      | Loss  |
| DEL00036680 | chr4 | 86,587,119 | 86,587,525 | 406     | Loss  |
| DEL00036684 | chr4 | 86,627,072 | 86,627,129 | 57      | Loss  |
| DEL00036716 | chr4 | 87,085,033 | 87,086,397 | 1,364   | Loss  |
| DEL00036732 | chr4 | 87,366,590 | 87,367,107 | 517     | Loss  |
| DUP00036733 | chr4 | 87,390,402 | 87,391,384 | 982     | Gain  |
| DEL00036742 | chr4 | 87,422,482 | 87,423,240 | 758     | Loss  |
| DEL00036746 | chr4 | 87,475,059 | 87,475,110 | 51      | Loss  |
| DEL00036752 | chr4 | 87,568,687 | 87,568,792 | 105     | Loss  |
| DEL00036754 | chr4 | 87,585,415 | 87,586,384 | 969     | Loss  |

|             |      |            |            |       |       |
|-------------|------|------------|------------|-------|-------|
| DEL00036764 | chr4 | 87,668,140 | 87,668,220 | 80    | Loss  |
| DEL00036776 | chr4 | 87,850,852 | 87,851,425 | 573   | Loss  |
| DEL00036778 | chr4 | 87,880,995 | 87,881,087 | 92    | Loss  |
| DEL00036779 | chr4 | 87,894,526 | 87,895,421 | 895   | Loss  |
| DEL00036792 | chr4 | 88,050,111 | 88,050,200 | 89    | Loss  |
| DEL00036800 | chr4 | 88,150,971 | 88,151,997 | 1,026 | Loss  |
| DEL00036801 | chr4 | 88,152,175 | 88,152,475 | 300   | Loss  |
| DEL00036812 | chr4 | 88,284,196 | 88,284,584 | 388   | Loss  |
| DEL00036828 | chr4 | 88,404,549 | 88,404,603 | 54    | Loss  |
| DEL00036832 | chr4 | 88,441,553 | 88,441,655 | 102   | Loss  |
| DEL00036835 | chr4 | 88,564,806 | 88,564,871 | 65    | Loss  |
| DEL00036841 | chr4 | 88,639,517 | 88,639,581 | 64    | Loss  |
| DEL00036844 | chr4 | 88,737,626 | 88,737,692 | 66    | Loss  |
| DEL00036852 | chr4 | 88,872,990 | 88,873,386 | 396   | Loss  |
| DEL00036853 | chr4 | 88,873,971 | 88,874,027 | 56    | Loss  |
| DEL00036854 | chr4 | 88,876,780 | 88,877,066 | 286   | Loss  |
| DUP00036857 | chr4 | 88,936,743 | 88,936,856 | 113   | Gain  |
| DEL00036866 | chr4 | 88,981,667 | 88,981,767 | 100   | Loss  |
| DEL00036867 | chr4 | 88,988,584 | 88,989,229 | 645   | Loss  |
| DEL00036891 | chr4 | 89,146,374 | 89,146,431 | 57    | Loss  |
| DEL00036905 | chr4 | 89,289,293 | 89,290,012 | 719   | Loss  |
| DEL00036916 | chr4 | 89,389,515 | 89,389,725 | 210   | Loss  |
| DEL00036918 | chr4 | 89,427,953 | 89,428,346 | 393   | Loss  |
| DEL00036931 | chr4 | 89,495,949 | 89,496,041 | 92    | Loss  |
| DEL00036933 | chr4 | 89,513,976 | 89,514,479 | 503   | Loss  |
| DEL00036951 | chr4 | 89,663,459 | 89,663,541 | 82    | Loss  |
| DEL00036972 | chr4 | 89,755,537 | 89,755,828 | 291   | Loss  |
| DEL00036975 | chr4 | 89,780,663 | 89,780,801 | 138   | Loss  |
| DEL00036987 | chr4 | 89,850,183 | 89,850,324 | 141   | Loss  |
| DEL00036990 | chr4 | 89,889,529 | 89,890,056 | 527   | Loss  |
| DEL00036992 | chr4 | 89,914,589 | 89,915,089 | 500   | Loss  |
| DEL00037001 | chr4 | 90,090,022 | 90,090,089 | 67    | Loss  |
| DEL00037002 | chr4 | 90,106,920 | 90,106,994 | 74    | Loss  |
| DEL00037006 | chr4 | 90,178,070 | 90,178,122 | 52    | Loss  |
| DEL00037017 | chr4 | 90,305,098 | 90,305,636 | 538   | Loss  |
| DEL00037022 | chr4 | 90,422,544 | 90,422,689 | 145   | Loss  |
| DEL00037023 | chr4 | 90,431,685 | 90,438,044 | 6,359 | Loss  |
| DUP00037025 | chr4 | 90,484,779 | 90,485,591 | 812   | Gain  |
| DEL00037034 | chr4 | 90,488,444 | 90,488,508 | 64    | Loss  |
| DUP00037052 | chr4 | 90,498,482 | 90,498,877 | 395   | Gain  |
| DUP00037054 | chr4 | 90,507,255 | 90,507,416 | 161   | Mixed |
| DEL00037102 | chr4 | 90,538,156 | 90,539,595 | 1,439 | Mixed |
| DEL00037119 | chr4 | 90,540,629 | 90,540,819 | 190   | Loss  |
| DUP00037156 | chr4 | 90,555,140 | 90,555,303 | 163   | Gain  |
| DUP00037227 | chr4 | 90,777,207 | 90,777,322 | 115   | Gain  |
| DEL00037229 | chr4 | 90,857,918 | 90,857,995 | 77    | Loss  |
| DUP00037255 | chr4 | 90,962,511 | 90,965,506 | 2,995 | Gain  |
| DEL00037262 | chr4 | 90,980,118 | 90,980,224 | 106   | Loss  |
| DEL00037276 | chr4 | 90,991,932 | 90,992,008 | 76    | Loss  |

|             |      |           |           |        |      |
|-------------|------|-----------|-----------|--------|------|
| DEL00037298 | chr5 | 132,948   | 133,013   | 65     | Loss |
| DEL00037305 | chr5 | 207,657   | 207,731   | 74     | Loss |
| DEL00037324 | chr5 | 446,564   | 447,990   | 1,426  | Loss |
| DEL00037333 | chr5 | 479,081   | 488,634   | 9,553  | Loss |
| DEL00037334 | chr5 | 526,702   | 526,758   | 56     | Loss |
| DEL00037344 | chr5 | 917,181   | 917,282   | 101    | Loss |
| DEL00037346 | chr5 | 990,159   | 990,733   | 574    | Loss |
| DEL00037372 | chr5 | 1,224,919 | 1,226,083 | 1,164  | Loss |
| DEL00037378 | chr5 | 1,302,114 | 1,302,169 | 55     | Loss |
| DEL00037379 | chr5 | 1,312,690 | 1,312,872 | 182    | Loss |
| DEL00037381 | chr5 | 1,329,730 | 1,330,024 | 294    | Loss |
| DUP00037388 | chr5 | 1,423,542 | 1,423,617 | 75     | Gain |
| DEL00037389 | chr5 | 1,435,729 | 1,436,316 | 587    | Loss |
| DEL00037391 | chr5 | 1,458,144 | 1,458,229 | 85     | Loss |
| DEL00037398 | chr5 | 1,530,505 | 1,530,677 | 172    | Loss |
| DEL00037399 | chr5 | 1,618,061 | 1,618,228 | 167    | Loss |
| DEL00037401 | chr5 | 1,676,387 | 1,676,642 | 255    | Loss |
| DEL00037412 | chr5 | 1,863,881 | 1,864,032 | 151    | Loss |
| DEL00037419 | chr5 | 1,974,773 | 1,974,956 | 183    | Loss |
| DEL00037421 | chr5 | 2,003,080 | 2,003,157 | 77     | Loss |
| DEL00037427 | chr5 | 2,111,284 | 2,111,472 | 188    | Loss |
| DEL00037430 | chr5 | 2,232,875 | 2,233,054 | 179    | Loss |
| DEL00037431 | chr5 | 2,284,635 | 2,284,784 | 149    | Loss |
| DEL00037432 | chr5 | 2,286,545 | 2,287,180 | 635    | Loss |
| DEL00037446 | chr5 | 2,454,473 | 2,454,548 | 75     | Loss |
| DEL00037453 | chr5 | 2,715,797 | 2,716,295 | 498    | Loss |
| DEL00037456 | chr5 | 2,817,084 | 2,824,444 | 7,360  | Loss |
| DEL00037461 | chr5 | 2,891,145 | 2,896,358 | 5,213  | Loss |
| DUP00037462 | chr5 | 2,984,764 | 2,984,942 | 178    | Gain |
| DEL00037467 | chr5 | 3,066,184 | 3,066,473 | 289    | Loss |
| DEL00037469 | chr5 | 3,072,286 | 3,073,046 | 760    | Loss |
| DEL00037474 | chr5 | 3,274,417 | 3,293,318 | 18,901 | Loss |
| DEL00037477 | chr5 | 3,299,253 | 3,301,579 | 2,326  | Loss |
| DEL00037487 | chr5 | 3,519,247 | 3,519,473 | 226    | Loss |
| DEL00037489 | chr5 | 3,562,467 | 3,565,903 | 3,436  | Loss |
| DUP00037496 | chr5 | 3,665,998 | 3,666,172 | 174    | Gain |
| DEL00037498 | chr5 | 3,722,470 | 3,722,536 | 66     | Loss |
| DEL00037499 | chr5 | 3,788,016 | 3,788,075 | 59     | Loss |
| DEL00037510 | chr5 | 4,131,142 | 4,131,598 | 456    | Loss |
| DEL00037513 | chr5 | 4,201,501 | 4,202,423 | 922    | Loss |
| DEL00037514 | chr5 | 4,203,339 | 4,205,287 | 1,948  | Loss |
| DEL00037528 | chr5 | 4,476,089 | 4,476,436 | 347    | Loss |
| DEL00037533 | chr5 | 4,503,201 | 4,503,482 | 281    | Loss |
| DEL00037536 | chr5 | 4,548,040 | 4,552,423 | 4,383  | Loss |
| DEL00037538 | chr5 | 4,572,963 | 4,573,145 | 182    | Loss |
| DEL00037542 | chr5 | 4,664,760 | 4,665,360 | 600    | Loss |
| DEL00037546 | chr5 | 4,714,610 | 4,714,944 | 334    | Loss |
| DEL00037563 | chr5 | 5,004,356 | 5,004,851 | 495    | Loss |
| DEL00037569 | chr5 | 5,056,851 | 5,057,380 | 529    | Loss |

|             |      |           |           |       |       |
|-------------|------|-----------|-----------|-------|-------|
| DEL00037579 | chr5 | 5,168,507 | 5,168,838 | 331   | Loss  |
| DEL00037585 | chr5 | 5,217,988 | 5,218,319 | 331   | Loss  |
| DEL00037586 | chr5 | 5,249,932 | 5,250,027 | 95    | Loss  |
| DEL00037588 | chr5 | 5,268,233 | 5,269,040 | 807   | Loss  |
| DEL00037592 | chr5 | 5,460,249 | 5,460,354 | 105   | Loss  |
| DEL00037599 | chr5 | 5,721,760 | 5,721,845 | 85    | Loss  |
| DEL00037602 | chr5 | 5,797,980 | 5,798,078 | 98    | Loss  |
| DEL00037603 | chr5 | 5,805,282 | 5,805,514 | 232   | Loss  |
| DEL00037655 | chr5 | 6,036,154 | 6,038,137 | 1,983 | Loss  |
| DEL00037667 | chr5 | 6,104,429 | 6,104,503 | 74    | Loss  |
| DEL00037675 | chr5 | 6,152,024 | 6,152,087 | 63    | Loss  |
| DEL00037684 | chr5 | 6,298,365 | 6,298,497 | 132   | Loss  |
| DEL00037686 | chr5 | 6,332,656 | 6,332,725 | 69    | Loss  |
| DEL00037701 | chr5 | 6,573,592 | 6,573,852 | 260   | Loss  |
| DEL00037703 | chr5 | 6,635,290 | 6,635,356 | 66    | Loss  |
| DEL00037704 | chr5 | 6,660,100 | 6,660,158 | 58    | Loss  |
| DEL00037707 | chr5 | 6,705,321 | 6,705,386 | 65    | Loss  |
| DEL00037725 | chr5 | 6,960,094 | 6,960,162 | 68    | Loss  |
| DEL00037726 | chr5 | 6,965,372 | 6,965,429 | 57    | Loss  |
| DEL00037739 | chr5 | 7,173,330 | 7,174,125 | 795   | Loss  |
| DEL00037751 | chr5 | 7,356,107 | 7,356,259 | 152   | Loss  |
| DEL00037754 | chr5 | 7,432,728 | 7,434,419 | 1,691 | Loss  |
| DEL00037756 | chr5 | 7,457,385 | 7,457,476 | 91    | Loss  |
| DEL00037780 | chr5 | 7,823,726 | 7,823,784 | 58    | Loss  |
| DEL00037781 | chr5 | 7,834,268 | 7,834,387 | 119   | Loss  |
| DEL00037784 | chr5 | 7,890,338 | 7,890,594 | 256   | Loss  |
| DEL00037803 | chr5 | 8,094,459 | 8,094,685 | 226   | Loss  |
| DEL00037809 | chr5 | 8,168,952 | 8,169,235 | 283   | Loss  |
| DUP00037810 | chr5 | 8,191,568 | 8,191,665 | 97    | Gain  |
| DEL00037812 | chr5 | 8,232,038 | 8,232,258 | 220   | Loss  |
| DEL00037813 | chr5 | 8,269,613 | 8,270,687 | 1,074 | Loss  |
| DUP00037814 | chr5 | 8,305,234 | 8,314,990 | 9,756 | Mixed |
| DEL00037816 | chr5 | 8,345,177 | 8,345,243 | 66    | Loss  |
| DEL00037821 | chr5 | 8,360,564 | 8,360,726 | 162   | Loss  |
| DEL00037827 | chr5 | 8,497,780 | 8,499,460 | 1,680 | Loss  |
| DEL00037829 | chr5 | 8,500,372 | 8,500,542 | 170   | Loss  |
| DEL00037830 | chr5 | 8,532,361 | 8,532,440 | 79    | Loss  |
| DEL00037835 | chr5 | 8,554,197 | 8,554,527 | 330   | Loss  |
| DEL00037839 | chr5 | 8,608,731 | 8,609,164 | 433   | Loss  |
| DUP00037841 | chr5 | 8,639,128 | 8,639,199 | 71    | Gain  |
| DEL00037843 | chr5 | 8,674,533 | 8,674,649 | 116   | Loss  |
| DEL00037845 | chr5 | 8,681,437 | 8,681,536 | 99    | Loss  |
| DEL00037850 | chr5 | 8,746,529 | 8,746,838 | 309   | Loss  |
| DEL00037855 | chr5 | 8,805,534 | 8,805,844 | 310   | Loss  |
| DEL00037857 | chr5 | 8,852,504 | 8,852,722 | 218   | Loss  |
| DEL00037858 | chr5 | 8,877,348 | 8,877,900 | 552   | Loss  |
| DEL00037868 | chr5 | 8,957,750 | 8,957,811 | 61    | Loss  |
| DEL00037870 | chr5 | 9,008,850 | 9,008,910 | 60    | Loss  |
| DEL00037871 | chr5 | 9,030,579 | 9,032,516 | 1,937 | Loss  |

|             |      |            |            |       |      |
|-------------|------|------------|------------|-------|------|
| DEL00037884 | chr5 | 9,178,511  | 9,178,647  | 136   | Loss |
| DEL00037885 | chr5 | 9,183,980  | 9,184,056  | 76    | Loss |
| DEL00037892 | chr5 | 9,332,724  | 9,333,266  | 542   | Loss |
| DEL00037893 | chr5 | 9,334,621  | 9,334,699  | 78    | Loss |
| DEL00037904 | chr5 | 9,731,409  | 9,731,497  | 88    | Loss |
| DEL00037911 | chr5 | 9,958,573  | 9,959,332  | 759   | Loss |
| DEL00037916 | chr5 | 9,988,725  | 9,988,860  | 135   | Loss |
| DEL00037919 | chr5 | 10,044,911 | 10,045,728 | 817   | Loss |
| DEL00037920 | chr5 | 10,048,519 | 10,048,987 | 468   | Loss |
| DEL00037929 | chr5 | 10,263,686 | 10,263,899 | 213   | Loss |
| DEL00037936 | chr5 | 10,394,085 | 10,394,137 | 52    | Loss |
| DEL00037937 | chr5 | 10,394,584 | 10,394,739 | 155   | Loss |
| DEL00037941 | chr5 | 10,512,011 | 10,512,076 | 65    | Loss |
| DEL00037943 | chr5 | 10,546,120 | 10,546,246 | 126   | Loss |
| DEL00037945 | chr5 | 10,573,728 | 10,573,788 | 60    | Loss |
| DEL00037948 | chr5 | 10,707,068 | 10,707,318 | 250   | Loss |
| DEL00037952 | chr5 | 10,755,374 | 10,755,473 | 99    | Loss |
| DEL00037956 | chr5 | 10,840,237 | 10,840,711 | 474   | Loss |
| DEL00037975 | chr5 | 11,333,803 | 11,335,841 | 2,038 | Loss |
| DEL00037979 | chr5 | 11,458,580 | 11,458,663 | 83    | Loss |
| DEL00037984 | chr5 | 11,504,849 | 11,504,911 | 62    | Loss |
| DEL00037987 | chr5 | 11,534,043 | 11,534,208 | 165   | Loss |
| DEL00037995 | chr5 | 11,693,780 | 11,693,887 | 107   | Loss |
| DEL00037997 | chr5 | 11,764,477 | 11,764,903 | 426   | Loss |
| DEL00038003 | chr5 | 11,799,388 | 11,799,471 | 83    | Loss |
| DEL00038014 | chr5 | 11,949,998 | 11,950,461 | 463   | Loss |
| DEL00038017 | chr5 | 12,007,565 | 12,008,034 | 469   | Loss |
| DEL00038021 | chr5 | 12,046,959 | 12,047,105 | 146   | Loss |
| DEL00038022 | chr5 | 12,054,402 | 12,054,831 | 429   | Loss |
| DEL00038028 | chr5 | 12,151,652 | 12,151,736 | 84    | Loss |
| DEL00038034 | chr5 | 12,241,513 | 12,242,090 | 577   | Loss |
| DEL00038036 | chr5 | 12,247,504 | 12,247,623 | 119   | Loss |
| DEL00038044 | chr5 | 12,493,597 | 12,493,653 | 56    | Loss |
| DEL00038049 | chr5 | 12,651,311 | 12,651,394 | 83    | Loss |
| DEL00038051 | chr5 | 12,715,399 | 12,715,652 | 253   | Loss |
| DEL00038052 | chr5 | 12,786,626 | 12,787,710 | 1,084 | Loss |
| DEL00038056 | chr5 | 12,853,353 | 12,853,497 | 144   | Loss |
| DEL00038060 | chr5 | 12,947,188 | 12,948,271 | 1,083 | Loss |
| DEL00038066 | chr5 | 13,052,439 | 13,052,514 | 75    | Loss |
| DEL00038071 | chr5 | 13,204,212 | 13,204,290 | 78    | Loss |
| DEL00038075 | chr5 | 13,221,403 | 13,221,974 | 571   | Loss |
| DEL00038081 | chr5 | 13,285,493 | 13,285,815 | 322   | Loss |
| DEL00038084 | chr5 | 13,342,148 | 13,342,286 | 138   | Loss |
| DEL00038094 | chr5 | 13,690,538 | 13,690,610 | 72    | Loss |
| DEL00038096 | chr5 | 13,693,916 | 13,695,689 | 1,773 | Loss |
| DEL00038114 | chr5 | 13,767,430 | 13,767,509 | 79    | Loss |
| DEL00038119 | chr5 | 13,890,527 | 13,890,954 | 427   | Loss |
| DEL00038121 | chr5 | 13,925,356 | 13,925,754 | 398   | Loss |
| DEL00038130 | chr5 | 14,053,394 | 14,054,027 | 633   | Loss |

|             |      |            |            |        |      |
|-------------|------|------------|------------|--------|------|
| DEL00038136 | chr5 | 14,132,021 | 14,134,030 | 2,009  | Loss |
| DEL00038137 | chr5 | 14,136,558 | 14,136,749 | 191    | Loss |
| DEL00038138 | chr5 | 14,165,076 | 14,165,859 | 783    | Loss |
| DEL00038140 | chr5 | 14,185,258 | 14,185,618 | 360    | Loss |
| DEL00038142 | chr5 | 14,235,850 | 14,236,017 | 167    | Loss |
| DEL00038143 | chr5 | 14,239,962 | 14,240,048 | 86     | Loss |
| DEL00038145 | chr5 | 14,273,119 | 14,273,293 | 174    | Loss |
| DEL00038149 | chr5 | 14,330,545 | 14,330,961 | 416    | Loss |
| DEL00038153 | chr5 | 14,427,055 | 14,427,163 | 108    | Loss |
| DEL00038178 | chr5 | 14,785,629 | 14,785,807 | 178    | Loss |
| DEL00038195 | chr5 | 14,987,141 | 14,987,193 | 52     | Loss |
| DEL00038196 | chr5 | 15,002,992 | 15,003,044 | 52     | Loss |
| DEL00038198 | chr5 | 15,073,646 | 15,073,740 | 94     | Loss |
| DEL00038203 | chr5 | 15,133,536 | 15,133,677 | 141    | Loss |
| DEL00038219 | chr5 | 15,355,131 | 15,355,233 | 102    | Loss |
| DEL00038222 | chr5 | 15,387,616 | 15,387,970 | 354    | Loss |
| DEL00038226 | chr5 | 15,506,697 | 15,507,022 | 325    | Loss |
| DEL00038227 | chr5 | 15,531,949 | 15,532,003 | 54     | Loss |
| DEL00038231 | chr5 | 15,621,830 | 15,625,455 | 3,625  | Loss |
| DUP00038235 | chr5 | 15,664,181 | 15,670,041 | 5,860  | Gain |
| DEL00038237 | chr5 | 15,688,834 | 15,688,909 | 75     | Loss |
| DEL00038238 | chr5 | 15,713,992 | 15,714,155 | 163    | Loss |
| DEL00038239 | chr5 | 15,861,435 | 15,861,487 | 52     | Loss |
| DEL00038242 | chr5 | 15,927,927 | 15,928,003 | 76     | Loss |
| DEL00038248 | chr5 | 16,183,471 | 16,183,581 | 110    | Loss |
| DEL00038249 | chr5 | 16,189,412 | 16,189,492 | 80     | Loss |
| DEL00038257 | chr5 | 16,367,177 | 16,367,229 | 52     | Loss |
| DEL00038263 | chr5 | 16,452,697 | 16,452,788 | 91     | Loss |
| DEL00038355 | chr5 | 16,491,153 | 16,497,115 | 5,962  | Loss |
| DEL00038397 | chr5 | 16,739,400 | 16,739,863 | 463    | Loss |
| DEL00038400 | chr5 | 16,788,260 | 16,788,877 | 617    | Loss |
| DEL00038407 | chr5 | 16,958,338 | 16,958,760 | 422    | Loss |
| DEL00038410 | chr5 | 17,024,307 | 17,024,367 | 60     | Loss |
| DEL00038411 | chr5 | 17,095,325 | 17,095,470 | 145    | Loss |
| DEL00038415 | chr5 | 17,235,368 | 17,235,426 | 58     | Loss |
| DEL00038420 | chr5 | 17,310,442 | 17,311,131 | 689    | Loss |
| DEL00038434 | chr5 | 17,499,488 | 17,499,568 | 80     | Loss |
| DEL00038441 | chr5 | 17,589,596 | 17,589,670 | 74     | Loss |
| DEL00038446 | chr5 | 17,663,709 | 17,663,781 | 72     | Loss |
| DEL00038455 | chr5 | 17,736,704 | 17,736,791 | 87     | Loss |
| DUP00038462 | chr5 | 17,819,270 | 17,829,846 | 10,576 | Gain |
| DEL00038466 | chr5 | 17,902,350 | 17,903,970 | 1,620  | Loss |
| DEL00038472 | chr5 | 18,007,033 | 18,007,136 | 103    | Loss |
| DEL00038474 | chr5 | 18,019,280 | 18,019,753 | 473    | Loss |
| DEL00038476 | chr5 | 18,035,518 | 18,041,588 | 6,070  | Loss |
| DEL00038477 | chr5 | 18,166,861 | 18,167,848 | 987    | Loss |
| DEL00038478 | chr5 | 18,184,291 | 18,185,057 | 766    | Loss |
| DEL00038479 | chr5 | 18,216,779 | 18,216,903 | 124    | Loss |
| DEL00038483 | chr5 | 18,253,245 | 18,253,444 | 199    | Loss |

|             |      |            |            |        |      |
|-------------|------|------------|------------|--------|------|
| DEL00038487 | chr5 | 18,262,217 | 18,262,437 | 220    | Loss |
| DEL00038495 | chr5 | 18,393,946 | 18,394,033 | 87     | Loss |
| DUP00038497 | chr5 | 18,458,446 | 18,467,681 | 9,235  | Gain |
| DEL00038500 | chr5 | 18,474,054 | 18,474,160 | 106    | Loss |
| DEL00038503 | chr5 | 18,534,024 | 18,534,082 | 58     | Loss |
| DEL00038516 | chr5 | 18,708,766 | 18,708,823 | 57     | Loss |
| DEL00038525 | chr5 | 18,816,688 | 18,816,778 | 90     | Loss |
| DEL00038544 | chr5 | 19,377,404 | 19,377,727 | 323    | Loss |
| DEL00038546 | chr5 | 19,421,912 | 19,422,079 | 167    | Loss |
| DEL00038548 | chr5 | 19,433,370 | 19,434,233 | 863    | Loss |
| DEL00038551 | chr5 | 19,463,834 | 19,463,999 | 165    | Loss |
| DEL00038553 | chr5 | 19,471,813 | 19,472,074 | 261    | Loss |
| DEL00038554 | chr5 | 19,523,730 | 19,524,405 | 675    | Loss |
| DEL00038558 | chr5 | 19,561,733 | 19,562,311 | 578    | Loss |
| DEL00038559 | chr5 | 19,576,644 | 19,577,163 | 519    | Loss |
| DEL00038564 | chr5 | 19,642,459 | 19,643,251 | 792    | Loss |
| DEL00038572 | chr5 | 19,706,659 | 19,706,766 | 107    | Loss |
| DEL00038573 | chr5 | 19,720,538 | 19,721,912 | 1,374  | Loss |
| DEL00038574 | chr5 | 19,732,869 | 19,734,231 | 1,362  | Loss |
| DEL00038589 | chr5 | 19,876,433 | 19,876,548 | 115    | Loss |
| DEL00038597 | chr5 | 19,947,474 | 19,947,946 | 472    | Loss |
| DEL00038603 | chr5 | 20,017,076 | 20,017,534 | 458    | Loss |
| DEL00038610 | chr5 | 20,097,872 | 20,098,158 | 286    | Loss |
| DUP00038626 | chr5 | 20,307,026 | 20,322,111 | 15,085 | Gain |
| DEL00038630 | chr5 | 20,429,170 | 20,429,274 | 104    | Loss |
| DEL00038635 | chr5 | 20,477,148 | 20,477,843 | 695    | Loss |
| DEL00038636 | chr5 | 20,482,422 | 20,482,475 | 53     | Loss |
| DEL00038638 | chr5 | 20,510,987 | 20,511,380 | 393    | Loss |
| DEL00038652 | chr5 | 20,719,374 | 20,719,462 | 88     | Loss |
| DUP00038653 | chr5 | 20,720,078 | 20,720,211 | 133    | Gain |
| DEL00038654 | chr5 | 20,727,051 | 20,727,108 | 57     | Loss |
| DEL00038664 | chr5 | 20,872,501 | 20,872,861 | 360    | Loss |
| DEL00038673 | chr5 | 21,122,777 | 21,123,518 | 741    | Loss |
| DEL00038677 | chr5 | 21,155,179 | 21,155,685 | 506    | Loss |
| DEL00038680 | chr5 | 21,196,690 | 21,196,743 | 53     | Loss |
| DEL00038687 | chr5 | 21,379,907 | 21,380,279 | 372    | Loss |
| DEL00038692 | chr5 | 21,530,203 | 21,536,036 | 5,833  | Loss |
| DEL00038695 | chr5 | 21,645,096 | 21,645,220 | 124    | Loss |
| DEL00038696 | chr5 | 21,646,466 | 21,646,880 | 414    | Loss |
| DEL00038698 | chr5 | 21,678,798 | 21,678,980 | 182    | Loss |
| DEL00038702 | chr5 | 22,207,510 | 22,207,867 | 357    | Loss |
| DEL00038704 | chr5 | 22,258,500 | 22,258,645 | 145    | Loss |
| DEL00038706 | chr5 | 22,391,692 | 22,391,747 | 55     | Loss |
| DEL00038708 | chr5 | 22,393,705 | 22,394,116 | 411    | Loss |
| DEL00038710 | chr5 | 22,433,883 | 22,433,969 | 86     | Loss |
| DEL00038711 | chr5 | 22,446,735 | 22,446,792 | 57     | Loss |
| DEL00038722 | chr5 | 22,680,104 | 22,680,422 | 318    | Loss |
| DEL00038724 | chr5 | 22,760,646 | 22,760,733 | 87     | Loss |
| DEL00038736 | chr5 | 22,908,371 | 22,908,429 | 58     | Loss |



|             |      |            |            |        |      |
|-------------|------|------------|------------|--------|------|
| DEL00038741 | chr5 | 22,967,381 | 22,967,595 | 214    | Loss |
| DEL00038748 | chr5 | 23,026,967 | 23,027,042 | 75     | Loss |
| DEL00038764 | chr5 | 23,599,592 | 23,599,694 | 102    | Loss |
| DEL00038770 | chr5 | 23,729,430 | 23,730,242 | 812    | Loss |
| DEL00038774 | chr5 | 23,810,818 | 23,811,399 | 581    | Loss |
| DEL00038777 | chr5 | 23,842,366 | 23,842,521 | 155    | Loss |
| DEL00038786 | chr5 | 23,949,868 | 23,949,934 | 66     | Loss |
| DEL00038789 | chr5 | 23,990,353 | 23,990,619 | 266    | Loss |
| DEL00038792 | chr5 | 24,076,149 | 24,076,278 | 129    | Loss |
| DEL00038794 | chr5 | 24,127,167 | 24,137,744 | 10,577 | Loss |
| DUP00038796 | chr5 | 24,156,703 | 24,162,143 | 5,440  | Gain |
| DUP00038803 | chr5 | 24,276,617 | 24,277,209 | 592    | Gain |
| DEL00038809 | chr5 | 24,450,958 | 24,451,043 | 85     | Loss |
| DUP00038812 | chr5 | 24,589,428 | 24,589,590 | 162    | Gain |
| DEL00038828 | chr5 | 24,894,251 | 24,894,330 | 79     | Loss |
| DEL00038836 | chr5 | 25,036,783 | 25,037,074 | 291    | Loss |
| DEL00038837 | chr5 | 25,055,141 | 25,055,275 | 134    | Loss |
| DEL00038839 | chr5 | 25,072,671 | 25,073,310 | 639    | Loss |
| DEL00038840 | chr5 | 25,077,249 | 25,078,038 | 789    | Loss |
| DEL00038844 | chr5 | 25,133,323 | 25,133,385 | 62     | Loss |
| DEL00038848 | chr5 | 25,280,901 | 25,281,384 | 483    | Loss |
| DEL00038851 | chr5 | 25,433,950 | 25,434,229 | 279    | Loss |
| DEL00038854 | chr5 | 25,481,766 | 25,482,432 | 666    | Loss |
| DEL00038857 | chr5 | 25,506,459 | 25,506,766 | 307    | Loss |
| DEL00038862 | chr5 | 25,557,307 | 25,557,433 | 126    | Loss |
| DEL00038865 | chr5 | 25,634,476 | 25,634,814 | 338    | Loss |
| DEL00038867 | chr5 | 25,691,610 | 25,691,807 | 197    | Loss |
| DEL00038873 | chr5 | 25,766,787 | 25,767,075 | 288    | Loss |
| DEL00038876 | chr5 | 25,826,291 | 25,826,753 | 462    | Loss |
| DEL00038892 | chr5 | 26,256,426 | 26,257,306 | 880    | Loss |
| DEL00038893 | chr5 | 26,257,559 | 26,259,068 | 1,509  | Loss |
| DEL00038896 | chr5 | 26,293,666 | 26,294,180 | 514    | Loss |
| DEL00038902 | chr5 | 26,354,159 | 26,354,210 | 51     | Loss |
| DEL00038910 | chr5 | 26,434,454 | 26,434,637 | 183    | Loss |
| DEL00038913 | chr5 | 26,440,962 | 26,441,014 | 52     | Loss |
| DEL00038919 | chr5 | 26,455,416 | 26,455,550 | 134    | Loss |
| DEL00038923 | chr5 | 26,553,154 | 26,553,642 | 488    | Loss |
| DEL00038925 | chr5 | 26,594,409 | 26,596,063 | 1,654  | Loss |
| DEL00038930 | chr5 | 26,627,867 | 26,628,061 | 194    | Loss |
| DEL00038933 | chr5 | 26,681,222 | 26,681,471 | 249    | Loss |
| DEL00038938 | chr5 | 26,820,261 | 26,820,458 | 197    | Loss |
| DEL00038939 | chr5 | 26,821,425 | 26,821,540 | 115    | Loss |
| DEL00038947 | chr5 | 26,986,242 | 26,986,767 | 525    | Loss |
| DEL00038953 | chr5 | 27,005,158 | 27,010,712 | 5,554  | Loss |
| DEL00038956 | chr5 | 27,067,352 | 27,067,460 | 108    | Loss |
| DEL00038974 | chr5 | 27,250,400 | 27,250,573 | 173    | Loss |
| DEL00038976 | chr5 | 27,302,909 | 27,303,117 | 208    | Loss |
| DEL00038977 | chr5 | 27,358,238 | 27,358,308 | 70     | Loss |
| DEL00038978 | chr5 | 27,360,384 | 27,360,732 | 348    | Loss |

|             |      |            |            |        |      |
|-------------|------|------------|------------|--------|------|
| DEL00038979 | chr5 | 27,362,667 | 27,362,721 | 54     | Loss |
| DEL00038991 | chr5 | 27,530,188 | 27,530,281 | 93     | Loss |
| DEL00038993 | chr5 | 27,557,997 | 27,558,475 | 478    | Loss |
| DEL00038995 | chr5 | 27,595,036 | 27,595,256 | 220    | Loss |
| DEL00038998 | chr5 | 27,637,677 | 27,637,792 | 115    | Loss |
| DEL00039008 | chr5 | 27,707,906 | 27,708,070 | 164    | Loss |
| DEL00039017 | chr5 | 27,892,454 | 27,892,561 | 107    | Loss |
| DEL00039018 | chr5 | 27,896,678 | 27,896,796 | 118    | Loss |
| DEL00039021 | chr5 | 27,995,727 | 27,996,104 | 377    | Loss |
| DEL00039026 | chr5 | 28,046,547 | 28,046,951 | 404    | Loss |
| DEL00039033 | chr5 | 28,137,276 | 28,137,695 | 419    | Loss |
| DEL00039044 | chr5 | 28,344,123 | 28,344,236 | 113    | Loss |
| DEL00039050 | chr5 | 28,440,034 | 28,440,118 | 84     | Loss |
| DEL00039052 | chr5 | 28,452,773 | 28,452,839 | 66     | Loss |
| DEL00039054 | chr5 | 28,489,493 | 28,489,745 | 252    | Loss |
| DEL00039059 | chr5 | 28,619,498 | 28,619,653 | 155    | Loss |
| DEL00039074 | chr5 | 28,796,230 | 28,797,186 | 956    | Loss |
| DEL00039075 | chr5 | 28,820,195 | 28,820,633 | 438    | Loss |
| DEL00039082 | chr5 | 28,948,814 | 28,948,965 | 151    | Loss |
| DEL00039084 | chr5 | 28,980,443 | 28,980,532 | 89     | Loss |
| DEL00039089 | chr5 | 29,065,433 | 29,065,588 | 155    | Loss |
| DEL00039090 | chr5 | 29,070,569 | 29,072,767 | 2,198  | Loss |
| DEL00039091 | chr5 | 29,088,853 | 29,089,651 | 798    | Loss |
| DEL00039092 | chr5 | 29,100,540 | 29,105,273 | 4,733  | Loss |
| DEL00039103 | chr5 | 29,274,635 | 29,274,838 | 203    | Loss |
| DEL00039107 | chr5 | 29,392,676 | 29,393,271 | 595    | Loss |
| DEL00039108 | chr5 | 29,414,676 | 29,415,772 | 1,096  | Loss |
| DEL00039118 | chr5 | 29,652,320 | 29,652,378 | 58     | Loss |
| DEL00039122 | chr5 | 29,747,120 | 29,747,885 | 765    | Loss |
| DEL00039128 | chr5 | 29,929,172 | 29,929,986 | 814    | Loss |
| DEL00039146 | chr5 | 30,106,128 | 30,106,295 | 167    | Loss |
| DEL00039152 | chr5 | 30,141,569 | 30,141,732 | 163    | Loss |
| DUP00039154 | chr5 | 30,169,583 | 30,170,372 | 789    | Gain |
| DEL00039157 | chr5 | 30,190,796 | 30,191,069 | 273    | Loss |
| DEL00039158 | chr5 | 30,212,975 | 30,213,088 | 113    | Loss |
| DEL00039167 | chr5 | 30,471,639 | 30,471,739 | 100    | Loss |
| DEL00039172 | chr5 | 30,613,828 | 30,613,936 | 108    | Loss |
| DUP00039176 | chr5 | 30,798,925 | 30,815,162 | 16,237 | Gain |
| DEL00039183 | chr5 | 30,952,925 | 30,953,013 | 88     | Loss |
| DEL00039186 | chr5 | 31,077,287 | 31,077,421 | 134    | Loss |
| DEL00039191 | chr5 | 31,198,723 | 31,198,882 | 159    | Loss |
| DEL00039193 | chr5 | 31,302,227 | 31,302,609 | 382    | Loss |
| DEL00039194 | chr5 | 31,312,730 | 31,312,794 | 64     | Loss |
| DUP00039196 | chr5 | 31,430,629 | 31,430,930 | 301    | Gain |
| DEL00039198 | chr5 | 31,470,221 | 31,470,310 | 89     | Loss |
| DEL00039199 | chr5 | 31,480,257 | 31,480,346 | 89     | Loss |
| DEL00039201 | chr5 | 31,499,673 | 31,499,764 | 91     | Loss |
| DEL00039205 | chr5 | 31,573,295 | 31,574,758 | 1,463  | Loss |
| DEL00039212 | chr5 | 31,736,606 | 31,737,871 | 1,265  | Loss |

|             |      |            |            |        |       |
|-------------|------|------------|------------|--------|-------|
| DEL00039215 | chr5 | 31,753,185 | 31,753,566 | 381    | Loss  |
| DEL00039217 | chr5 | 31,823,737 | 31,823,813 | 76     | Loss  |
| DEL00039218 | chr5 | 31,834,430 | 31,834,868 | 438    | Loss  |
| DEL00039222 | chr5 | 31,861,036 | 31,863,533 | 2,497  | Loss  |
| DEL00039223 | chr5 | 31,894,055 | 31,894,825 | 770    | Loss  |
| DEL00039234 | chr5 | 31,950,054 | 31,950,135 | 81     | Loss  |
| DEL00039235 | chr5 | 31,952,445 | 31,952,653 | 208    | Loss  |
| DEL00039239 | chr5 | 32,000,635 | 32,001,215 | 580    | Loss  |
| DEL00039246 | chr5 | 32,109,907 | 32,110,231 | 324    | Loss  |
| DEL00039251 | chr5 | 32,121,547 | 32,122,414 | 867    | Loss  |
| DEL00039254 | chr5 | 32,160,912 | 32,161,451 | 539    | Loss  |
| DEL00039258 | chr5 | 32,217,230 | 32,221,455 | 4,225  | Loss  |
| DEL00039263 | chr5 | 32,344,217 | 32,344,334 | 117    | Loss  |
| DEL00039267 | chr5 | 32,561,341 | 32,561,562 | 221    | Loss  |
| DEL00039270 | chr5 | 32,598,753 | 32,599,870 | 1,117  | Loss  |
| DEL00039275 | chr5 | 32,718,615 | 32,718,789 | 174    | Loss  |
| DEL00039279 | chr5 | 32,838,389 | 32,838,477 | 88     | Loss  |
| DEL00039280 | chr5 | 32,840,369 | 32,840,543 | 174    | Loss  |
| DEL00039281 | chr5 | 32,853,554 | 32,853,763 | 209    | Loss  |
| DEL00039285 | chr5 | 32,986,396 | 32,986,959 | 563    | Loss  |
| DEL00039289 | chr5 | 33,049,205 | 33,049,326 | 121    | Loss  |
| DEL00039292 | chr5 | 33,091,831 | 33,092,047 | 216    | Loss  |
| DEL00039297 | chr5 | 33,297,620 | 33,298,173 | 553    | Loss  |
| DEL00039298 | chr5 | 33,300,156 | 33,300,591 | 435    | Loss  |
| DEL00039302 | chr5 | 33,413,639 | 33,413,857 | 218    | Loss  |
| DEL00039304 | chr5 | 33,436,262 | 33,436,348 | 86     | Loss  |
| DEL00039310 | chr5 | 33,533,653 | 33,534,459 | 806    | Loss  |
| DEL00039311 | chr5 | 33,564,320 | 33,564,570 | 250    | Loss  |
| DEL00039312 | chr5 | 33,593,257 | 33,595,155 | 1,898  | Loss  |
| DEL00039317 | chr5 | 33,651,229 | 33,651,788 | 559    | Loss  |
| DEL00039318 | chr5 | 33,657,584 | 33,657,806 | 222    | Loss  |
| DEL00039319 | chr5 | 33,664,169 | 33,664,236 | 67     | Loss  |
| DEL00039323 | chr5 | 33,694,558 | 33,694,657 | 99     | Loss  |
| DEL00039324 | chr5 | 33,695,242 | 33,695,434 | 192    | Loss  |
| DEL00039325 | chr5 | 33,700,396 | 33,700,453 | 57     | Loss  |
| DEL00039326 | chr5 | 33,702,802 | 33,702,853 | 51     | Loss  |
| DEL00039337 | chr5 | 33,719,712 | 33,719,816 | 104    | Loss  |
| DEL00039339 | chr5 | 33,748,353 | 33,748,834 | 481    | Loss  |
| DEL00039343 | chr5 | 33,778,805 | 33,778,895 | 90     | Loss  |
| DUP00039350 | chr5 | 33,924,027 | 33,962,483 | 38,456 | Gain  |
| DEL00039353 | chr5 | 34,068,362 | 34,068,515 | 153    | Loss  |
| DEL00039355 | chr5 | 34,117,373 | 34,117,642 | 269    | Loss  |
| DEL00039357 | chr5 | 34,179,304 | 34,179,716 | 412    | Loss  |
| DEL00039358 | chr5 | 34,188,886 | 34,189,047 | 161    | Loss  |
| DEL00039364 | chr5 | 34,311,741 | 34,311,942 | 201    | Loss  |
| DUP00039365 | chr5 | 34,328,948 | 34,335,771 | 6,823  | Mixed |
| DEL00039374 | chr5 | 34,424,336 | 34,424,551 | 215    | Loss  |
| DUP00039376 | chr5 | 34,467,203 | 34,467,257 | 54     | Gain  |
| DEL00039389 | chr5 | 34,702,110 | 34,702,601 | 491    | Loss  |

|             |      |            |            |        |      |
|-------------|------|------------|------------|--------|------|
| DEL00039391 | chr5 | 34,712,321 | 34,712,650 | 329    | Loss |
| DEL00039393 | chr5 | 34,754,509 | 34,754,561 | 52     | Loss |
| DEL00039395 | chr5 | 34,807,835 | 34,819,456 | 11,621 | Loss |
| DEL00039398 | chr5 | 34,819,597 | 34,819,860 | 263    | Loss |
| DEL00039400 | chr5 | 34,861,136 | 34,861,216 | 80     | Loss |
| DEL00039401 | chr5 | 34,877,809 | 34,877,903 | 94     | Loss |
| DEL00039402 | chr5 | 34,890,594 | 34,890,719 | 125    | Loss |
| DEL00039407 | chr5 | 34,980,762 | 34,986,596 | 5,834  | Loss |
| DEL00039411 | chr5 | 35,148,023 | 35,148,131 | 108    | Loss |
| DEL00039414 | chr5 | 35,251,394 | 35,251,960 | 566    | Loss |
| DEL00039420 | chr5 | 35,416,264 | 35,416,703 | 439    | Loss |
| DEL00039422 | chr5 | 35,446,568 | 35,446,640 | 72     | Loss |
| DUP00039428 | chr5 | 35,593,708 | 35,607,831 | 14,123 | Gain |
| DEL00039432 | chr5 | 35,646,509 | 35,646,717 | 208    | Loss |
| DEL00039438 | chr5 | 35,845,073 | 35,845,272 | 199    | Loss |
| DUP00039439 | chr5 | 35,859,665 | 35,888,962 | 29,297 | Gain |
| DEL00039441 | chr5 | 35,903,265 | 35,903,333 | 68     | Loss |
| DEL00039458 | chr5 | 36,359,880 | 36,360,695 | 815    | Loss |
| DEL00039460 | chr5 | 36,419,234 | 36,419,324 | 90     | Loss |
| DEL00039461 | chr5 | 36,434,118 | 36,434,189 | 71     | Loss |
| DEL00039464 | chr5 | 36,572,023 | 36,572,113 | 90     | Loss |
| DEL00039467 | chr5 | 36,678,000 | 36,678,068 | 68     | Loss |
| DEL00039478 | chr5 | 36,910,350 | 36,910,484 | 134    | Loss |
| DEL00039483 | chr5 | 37,024,499 | 37,024,551 | 52     | Loss |
| DEL00039488 | chr5 | 37,081,757 | 37,082,001 | 244    | Loss |
| DEL00039495 | chr5 | 37,213,705 | 37,213,785 | 80     | Loss |
| DEL00039496 | chr5 | 37,226,105 | 37,226,232 | 127    | Loss |
| DEL00039497 | chr5 | 37,258,504 | 37,258,588 | 84     | Loss |
| DEL00039508 | chr5 | 37,555,687 | 37,555,746 | 59     | Loss |
| DEL00039515 | chr5 | 37,824,159 | 37,824,268 | 109    | Loss |
| DEL00039520 | chr5 | 37,845,464 | 37,845,581 | 117    | Loss |
| DEL00039523 | chr5 | 37,912,479 | 37,912,980 | 501    | Loss |
| DEL00039527 | chr5 | 38,049,249 | 38,049,832 | 583    | Loss |
| DEL00039528 | chr5 | 38,097,888 | 38,098,095 | 207    | Loss |
| DEL00039537 | chr5 | 38,361,622 | 38,361,676 | 54     | Loss |
| DEL00039545 | chr5 | 38,573,753 | 38,573,867 | 114    | Loss |
| DEL00039547 | chr5 | 38,611,349 | 38,611,456 | 107    | Loss |
| DEL00039549 | chr5 | 38,661,406 | 38,661,459 | 53     | Loss |
| DEL00039551 | chr5 | 38,689,905 | 38,690,379 | 474    | Loss |
| DEL00039565 | chr5 | 38,939,700 | 38,941,459 | 1,759  | Loss |
| DEL00039569 | chr5 | 38,966,023 | 38,966,091 | 68     | Loss |
| DEL00039572 | chr5 | 39,061,401 | 39,061,566 | 165    | Loss |
| DEL00039573 | chr5 | 39,075,662 | 39,075,745 | 83     | Loss |
| DEL00039574 | chr5 | 39,112,466 | 39,113,066 | 600    | Loss |
| DEL00039578 | chr5 | 39,208,169 | 39,208,329 | 160    | Loss |
| DEL00039582 | chr5 | 39,269,446 | 39,269,771 | 325    | Loss |
| DEL00039592 | chr5 | 39,488,018 | 39,488,710 | 692    | Loss |
| DEL00039599 | chr5 | 39,759,349 | 39,759,728 | 379    | Loss |
| DEL00039611 | chr5 | 40,083,115 | 40,084,347 | 1,232  | Loss |

|             |      |            |            |        |       |
|-------------|------|------------|------------|--------|-------|
| DEL00039615 | chr5 | 40,161,722 | 40,161,806 | 84     | Loss  |
| DEL00039618 | chr5 | 40,221,867 | 40,222,476 | 609    | Loss  |
| DEL00039619 | chr5 | 40,228,851 | 40,228,999 | 148    | Loss  |
| DEL00039623 | chr5 | 40,285,772 | 40,286,522 | 750    | Loss  |
| DEL00039626 | chr5 | 40,354,782 | 40,355,041 | 259    | Loss  |
| DEL00039638 | chr5 | 40,539,974 | 40,540,025 | 51     | Loss  |
| DEL00039651 | chr5 | 40,919,176 | 40,919,301 | 125    | Loss  |
| DEL00039654 | chr5 | 41,049,277 | 41,049,840 | 563    | Loss  |
| DEL00039659 | chr5 | 41,163,456 | 41,164,134 | 678    | Loss  |
| DEL00039660 | chr5 | 41,178,802 | 41,179,622 | 820    | Loss  |
| DEL00039661 | chr5 | 41,182,047 | 41,182,123 | 76     | Loss  |
| DEL00039662 | chr5 | 41,182,736 | 41,183,191 | 455    | Loss  |
| DEL00039665 | chr5 | 41,206,724 | 41,206,877 | 153    | Loss  |
| DEL00039668 | chr5 | 41,344,925 | 41,345,057 | 132    | Loss  |
| DEL00039669 | chr5 | 41,362,038 | 41,362,096 | 58     | Loss  |
| DEL00039672 | chr5 | 41,495,854 | 41,515,585 | 19,731 | Loss  |
| DEL00039675 | chr5 | 41,523,781 | 41,523,919 | 138    | Loss  |
| DEL00039687 | chr5 | 41,758,790 | 41,759,212 | 422    | Loss  |
| DEL00039688 | chr5 | 41,762,966 | 41,763,875 | 909    | Loss  |
| DEL00039692 | chr5 | 41,771,923 | 41,771,991 | 68     | Loss  |
| DEL00039693 | chr5 | 41,796,686 | 41,796,743 | 57     | Loss  |
| DEL00039695 | chr5 | 41,838,896 | 41,838,998 | 102    | Loss  |
| DEL00039697 | chr5 | 41,859,948 | 41,860,136 | 188    | Loss  |
| DEL00039704 | chr5 | 42,082,863 | 42,083,441 | 578    | Loss  |
| DEL00039708 | chr5 | 42,268,530 | 42,270,161 | 1,631  | Loss  |
| DEL00039709 | chr5 | 42,309,223 | 42,309,722 | 499    | Loss  |
| DEL00039713 | chr5 | 42,429,309 | 42,429,406 | 97     | Loss  |
| DEL00039714 | chr5 | 42,436,417 | 42,436,485 | 68     | Loss  |
| DEL00039721 | chr5 | 42,637,198 | 42,638,087 | 889    | Loss  |
| DEL00039724 | chr5 | 42,657,837 | 42,657,897 | 60     | Loss  |
| DEL00039726 | chr5 | 42,718,553 | 42,718,662 | 109    | Loss  |
| DEL00039730 | chr5 | 42,760,426 | 42,760,917 | 491    | Loss  |
| DEL00039734 | chr5 | 42,839,220 | 42,839,350 | 130    | Loss  |
| DEL00039737 | chr5 | 42,866,801 | 42,866,853 | 52     | Loss  |
| DEL00039738 | chr5 | 42,883,735 | 42,883,958 | 223    | Loss  |
| DEL00039740 | chr5 | 42,957,580 | 42,957,696 | 116    | Loss  |
| DEL00039743 | chr5 | 43,065,746 | 43,066,469 | 723    | Loss  |
| DEL00039745 | chr5 | 43,109,007 | 43,109,204 | 197    | Loss  |
| DUP00039748 | chr5 | 43,117,473 | 43,146,559 | 29,086 | Mixed |
| DEL00039756 | chr5 | 43,180,494 | 43,180,799 | 305    | Loss  |
| DEL00039759 | chr5 | 43,214,044 | 43,214,428 | 384    | Loss  |
| DEL00039762 | chr5 | 43,218,634 | 43,218,897 | 263    | Loss  |
| DEL00039765 | chr5 | 43,255,528 | 43,255,762 | 234    | Loss  |
| DEL00039767 | chr5 | 43,295,119 | 43,295,297 | 178    | Loss  |
| DEL00039777 | chr5 | 43,420,145 | 43,420,774 | 629    | Loss  |
| DEL00039786 | chr5 | 43,542,772 | 43,543,340 | 568    | Loss  |
| DEL00039787 | chr5 | 43,562,087 | 43,566,157 | 4,070  | Loss  |
| DEL00039790 | chr5 | 43,600,579 | 43,601,985 | 1,406  | Loss  |
| DEL00039792 | chr5 | 43,614,759 | 43,614,826 | 67     | Loss  |

|             |      |            |            |       |      |
|-------------|------|------------|------------|-------|------|
| DEL00039804 | chr5 | 43,865,493 | 43,866,539 | 1,046 | Loss |
| DEL00039805 | chr5 | 43,889,861 | 43,889,985 | 124   | Loss |
| DEL00039817 | chr5 | 44,106,482 | 44,106,815 | 333   | Loss |
| DEL00039826 | chr5 | 44,187,156 | 44,187,246 | 90    | Loss |
| DEL00039827 | chr5 | 44,203,680 | 44,204,355 | 675   | Loss |
| DEL00039833 | chr5 | 44,233,944 | 44,234,087 | 143   | Loss |
| DEL00039834 | chr5 | 44,245,759 | 44,246,426 | 667   | Loss |
| DEL00039835 | chr5 | 44,249,321 | 44,249,478 | 157   | Loss |
| DEL00039845 | chr5 | 44,310,807 | 44,310,904 | 97    | Loss |
| DEL00039850 | chr5 | 44,361,337 | 44,362,210 | 873   | Loss |
| DEL00039852 | chr5 | 44,394,762 | 44,394,870 | 108   | Loss |
| DEL00039856 | chr5 | 44,425,498 | 44,425,737 | 239   | Loss |
| DEL00039861 | chr5 | 44,542,915 | 44,542,972 | 57    | Loss |
| DEL00039879 | chr5 | 44,911,945 | 44,912,390 | 445   | Loss |
| DEL00039890 | chr5 | 45,054,261 | 45,054,422 | 161   | Loss |
| DEL00039891 | chr5 | 45,071,892 | 45,071,973 | 81    | Loss |
| DEL00039892 | chr5 | 45,080,448 | 45,081,586 | 1,138 | Loss |
| DEL00039893 | chr5 | 45,081,687 | 45,081,742 | 55    | Loss |
| DEL00039902 | chr5 | 45,278,903 | 45,279,106 | 203   | Loss |
| DEL00039904 | chr5 | 45,308,225 | 45,308,276 | 51    | Loss |
| DEL00039908 | chr5 | 45,343,507 | 45,343,821 | 314   | Loss |
| DEL00039913 | chr5 | 45,374,062 | 45,374,133 | 71    | Loss |
| DEL00039914 | chr5 | 45,432,231 | 45,432,285 | 54    | Loss |
| DEL00039920 | chr5 | 45,513,411 | 45,513,466 | 55    | Loss |
| DEL00039921 | chr5 | 45,524,193 | 45,524,260 | 67    | Loss |
| DEL00039923 | chr5 | 45,527,110 | 45,527,303 | 193   | Loss |
| DEL00039924 | chr5 | 45,530,131 | 45,530,225 | 94    | Loss |
| DEL00039929 | chr5 | 45,616,644 | 45,616,959 | 315   | Loss |
| DEL00039942 | chr5 | 45,808,081 | 45,808,720 | 639   | Loss |
| DEL00039944 | chr5 | 45,816,647 | 45,816,916 | 269   | Loss |
| DEL00039947 | chr5 | 45,824,514 | 45,824,639 | 125   | Loss |
| DEL00039948 | chr5 | 45,833,102 | 45,834,201 | 1,099 | Loss |
| DEL00039957 | chr5 | 45,922,207 | 45,922,352 | 145   | Loss |
| DEL00039970 | chr5 | 46,207,061 | 46,207,118 | 57    | Loss |
| DEL00039974 | chr5 | 46,291,773 | 46,298,916 | 7,143 | Loss |
| DEL00039977 | chr5 | 46,358,220 | 46,358,302 | 82    | Loss |
| DEL00039978 | chr5 | 46,361,224 | 46,361,948 | 724   | Loss |
| DEL00039979 | chr5 | 46,365,203 | 46,367,429 | 2,226 | Loss |
| DEL00039982 | chr5 | 46,461,855 | 46,461,965 | 110   | Loss |
| DEL00039993 | chr5 | 46,740,569 | 46,740,822 | 253   | Loss |
| DEL00039999 | chr5 | 46,827,947 | 46,828,433 | 486   | Loss |
| DUP00040001 | chr5 | 46,856,904 | 46,857,073 | 169   | Gain |
| DEL00040003 | chr5 | 46,884,339 | 46,884,398 | 59    | Loss |
| DEL00040004 | chr5 | 46,901,336 | 46,901,872 | 536   | Loss |
| DEL00040008 | chr5 | 46,958,811 | 46,958,984 | 173   | Loss |
| DEL00040018 | chr5 | 47,051,855 | 47,052,257 | 402   | Loss |
| DEL00040021 | chr5 | 47,054,013 | 47,054,072 | 59    | Loss |
| DEL00040027 | chr5 | 47,197,608 | 47,197,665 | 57    | Loss |
| DEL00040028 | chr5 | 47,229,474 | 47,229,662 | 188   | Loss |

|             |      |            |            |       |      |
|-------------|------|------------|------------|-------|------|
| DEL00040043 | chr5 | 47,675,028 | 47,675,191 | 163   | Loss |
| DEL00040047 | chr5 | 47,820,224 | 47,820,319 | 95    | Loss |
| DEL00040074 | chr5 | 48,474,414 | 48,480,764 | 6,350 | Loss |
| DEL00040083 | chr5 | 48,829,039 | 48,829,161 | 122   | Loss |
| DEL00040090 | chr5 | 48,882,203 | 48,882,384 | 181   | Loss |
| DEL00040091 | chr5 | 48,899,328 | 48,899,619 | 291   | Loss |
| DEL00040097 | chr5 | 48,984,415 | 48,984,481 | 66    | Loss |
| DEL00040102 | chr5 | 49,009,936 | 49,010,028 | 92    | Loss |
| DEL00040103 | chr5 | 49,013,542 | 49,013,606 | 64    | Loss |
| DEL00040119 | chr5 | 49,399,427 | 49,399,558 | 131   | Loss |
| DEL00040122 | chr5 | 49,474,713 | 49,476,551 | 1,838 | Loss |
| DEL00040129 | chr5 | 49,550,180 | 49,550,233 | 53    | Loss |
| DUP00040130 | chr5 | 49,561,182 | 49,567,068 | 5,886 | Gain |
| DEL00040140 | chr5 | 49,609,293 | 49,609,355 | 62    | Loss |
| DEL00040145 | chr5 | 49,738,787 | 49,738,876 | 89    | Loss |
| DEL00040155 | chr5 | 49,910,891 | 49,910,986 | 95    | Loss |
| DEL00040163 | chr5 | 50,073,389 | 50,073,859 | 470   | Loss |
| DEL00040164 | chr5 | 50,089,338 | 50,089,391 | 53    | Loss |
| DEL00040165 | chr5 | 50,104,729 | 50,104,826 | 97    | Loss |
| DEL00040178 | chr5 | 50,257,008 | 50,257,090 | 82    | Loss |
| DEL00040184 | chr5 | 50,292,759 | 50,293,065 | 306   | Loss |
| DEL00040187 | chr5 | 50,333,257 | 50,333,555 | 298   | Loss |
| DEL00040189 | chr5 | 50,395,103 | 50,395,460 | 357   | Loss |
| DEL00040199 | chr5 | 50,538,045 | 50,538,104 | 59    | Loss |
| DEL00040208 | chr5 | 50,758,957 | 50,759,472 | 515   | Loss |
| DEL00040215 | chr5 | 50,847,923 | 50,847,975 | 52    | Loss |
| DEL00040217 | chr5 | 50,910,874 | 50,910,925 | 51    | Loss |
| DEL00040218 | chr5 | 50,916,005 | 50,916,221 | 216   | Loss |
| DEL00040234 | chr5 | 51,341,950 | 51,342,505 | 555   | Loss |
| DEL00040236 | chr5 | 51,397,207 | 51,397,269 | 62    | Loss |
| DEL00040240 | chr5 | 51,502,750 | 51,502,821 | 71    | Loss |
| DEL00040241 | chr5 | 51,520,473 | 51,520,600 | 127   | Loss |
| DEL00040244 | chr5 | 51,531,791 | 51,532,174 | 383   | Loss |
| DEL00040250 | chr5 | 51,656,334 | 51,656,577 | 243   | Loss |
| DEL00040253 | chr5 | 51,704,465 | 51,704,535 | 70    | Loss |
| DEL00040255 | chr5 | 51,795,621 | 51,795,856 | 235   | Loss |
| DEL00040257 | chr5 | 51,819,278 | 51,819,368 | 90    | Loss |
| DEL00040259 | chr5 | 51,830,608 | 51,831,724 | 1,116 | Loss |
| DEL00040260 | chr5 | 51,863,496 | 51,863,550 | 54    | Loss |
| DEL00040261 | chr5 | 51,870,615 | 51,870,671 | 56    | Loss |
| DEL00040271 | chr5 | 51,916,093 | 51,916,157 | 64    | Loss |
| DEL00040276 | chr5 | 51,999,148 | 51,999,645 | 497   | Loss |
| DEL00040279 | chr5 | 52,047,344 | 52,047,850 | 506   | Loss |
| DEL00040287 | chr5 | 52,149,857 | 52,150,202 | 345   | Loss |
| DEL00040297 | chr5 | 52,254,884 | 52,255,399 | 515   | Loss |
| DEL00040300 | chr5 | 52,338,536 | 52,338,739 | 203   | Loss |
| DEL00040305 | chr5 | 52,536,480 | 52,536,620 | 140   | Loss |
| DEL00040310 | chr5 | 52,638,046 | 52,638,900 | 854   | Loss |
| DEL00040315 | chr5 | 52,739,223 | 52,739,714 | 491   | Loss |

|             |      |            |            |        |      |
|-------------|------|------------|------------|--------|------|
| DEL00040317 | chr5 | 52,763,848 | 52,764,134 | 286    | Loss |
| DEL00040325 | chr5 | 52,941,660 | 52,941,836 | 176    | Loss |
| DEL00040332 | chr5 | 53,121,893 | 53,122,237 | 344    | Loss |
| DEL00040356 | chr5 | 53,426,668 | 53,426,963 | 295    | Loss |
| DEL00040358 | chr5 | 53,472,212 | 53,472,433 | 221    | Loss |
| DEL00040360 | chr5 | 53,533,406 | 53,534,391 | 985    | Loss |
| DEL00040366 | chr5 | 53,635,722 | 53,635,792 | 70     | Loss |
| DEL00040369 | chr5 | 53,685,923 | 53,686,024 | 101    | Loss |
| DEL00040375 | chr5 | 53,702,349 | 53,702,753 | 404    | Loss |
| DEL00040382 | chr5 | 53,809,771 | 53,810,302 | 531    | Loss |
| DEL00040383 | chr5 | 53,817,505 | 53,817,688 | 183    | Loss |
| DEL00040384 | chr5 | 53,856,786 | 53,856,866 | 80     | Loss |
| DEL00040385 | chr5 | 53,861,175 | 53,861,242 | 67     | Loss |
| DEL00040386 | chr5 | 53,877,706 | 53,879,551 | 1,845  | Loss |
| DEL00040392 | chr5 | 53,960,616 | 53,960,674 | 58     | Loss |
| DEL00040394 | chr5 | 53,963,040 | 53,963,371 | 331    | Loss |
| DEL00040395 | chr5 | 53,994,499 | 53,995,149 | 650    | Loss |
| DEL00040396 | chr5 | 54,009,012 | 54,009,149 | 137    | Loss |
| DEL00040404 | chr5 | 54,170,391 | 54,170,464 | 73     | Loss |
| DEL00040405 | chr5 | 54,170,677 | 54,171,268 | 591    | Loss |
| DEL00040406 | chr5 | 54,222,636 | 54,223,015 | 379    | Loss |
| DEL00040409 | chr5 | 54,242,724 | 54,242,785 | 61     | Loss |
| DEL00040411 | chr5 | 54,271,040 | 54,271,192 | 152    | Loss |
| DEL00040417 | chr5 | 54,394,684 | 54,394,769 | 85     | Loss |
| DEL00040434 | chr5 | 54,813,654 | 54,814,156 | 502    | Loss |
| DEL00040442 | chr5 | 54,978,472 | 54,978,532 | 60     | Loss |
| DEL00040452 | chr5 | 55,024,964 | 55,025,020 | 56     | Loss |
| DEL00040475 | chr5 | 55,358,241 | 55,358,299 | 58     | Loss |
| DEL00040476 | chr5 | 55,406,673 | 55,406,757 | 84     | Loss |
| DUP00040477 | chr5 | 55,466,670 | 55,466,768 | 98     | Gain |
| DEL00040493 | chr5 | 55,738,835 | 55,739,803 | 968    | Loss |
| DEL00040494 | chr5 | 55,741,741 | 55,762,047 | 20,306 | Loss |
| DEL00040501 | chr5 | 55,889,465 | 55,889,536 | 71     | Loss |
| DEL00040509 | chr5 | 55,967,809 | 55,968,477 | 668    | Loss |
| DEL00040512 | chr5 | 56,014,216 | 56,014,416 | 200    | Loss |
| DEL00040516 | chr5 | 56,077,525 | 56,077,704 | 179    | Loss |
| DEL00040521 | chr5 | 56,152,620 | 56,152,704 | 84     | Loss |
| DEL00040523 | chr5 | 56,175,262 | 56,175,515 | 253    | Loss |
| DEL00040527 | chr5 | 56,184,075 | 56,184,836 | 761    | Loss |
| DEL00040548 | chr5 | 56,329,007 | 56,329,402 | 395    | Loss |
| DEL00040549 | chr5 | 56,341,827 | 56,342,984 | 1,157  | Loss |
| DEL00040553 | chr5 | 56,390,271 | 56,390,443 | 172    | Loss |
| DEL00040554 | chr5 | 56,403,813 | 56,403,962 | 149    | Loss |
| DEL00040557 | chr5 | 56,556,710 | 56,557,186 | 476    | Loss |
| DEL00040563 | chr5 | 56,598,754 | 56,598,814 | 60     | Loss |
| DEL00040573 | chr5 | 56,712,011 | 56,712,629 | 618    | Loss |
| DEL00040586 | chr5 | 56,793,496 | 56,793,805 | 309    | Loss |
| DEL00040589 | chr5 | 56,795,681 | 56,795,861 | 180    | Loss |
| DEL00040595 | chr5 | 56,823,688 | 56,823,740 | 52     | Loss |



|             |      |            |            |       |       |
|-------------|------|------------|------------|-------|-------|
| DEL00040599 | chr5 | 56,838,062 | 56,838,304 | 242   | Loss  |
| DEL00040609 | chr5 | 56,910,236 | 56,910,358 | 122   | Loss  |
| DEL00040642 | chr5 | 57,233,920 | 57,234,051 | 131   | Loss  |
| DEL00040643 | chr5 | 57,241,811 | 57,242,714 | 903   | Loss  |
| DEL00040651 | chr5 | 57,336,389 | 57,336,517 | 128   | Loss  |
| DEL00040699 | chr5 | 57,535,259 | 57,535,363 | 104   | Loss  |
| DEL00040700 | chr5 | 57,564,600 | 57,565,013 | 413   | Loss  |
| DEL00040716 | chr5 | 57,599,052 | 57,599,224 | 172   | Loss  |
| DEL00040719 | chr5 | 57,605,631 | 57,606,087 | 456   | Loss  |
| DEL00040721 | chr5 | 57,624,073 | 57,624,152 | 79    | Loss  |
| DEL00040727 | chr5 | 57,673,557 | 57,676,826 | 3,269 | Mixed |
| DEL00040741 | chr5 | 57,727,481 | 57,727,558 | 77    | Loss  |
| DEL00040785 | chr5 | 58,113,220 | 58,113,284 | 64    | Loss  |
| DEL00040791 | chr5 | 58,150,107 | 58,150,316 | 209   | Loss  |
| DEL00040795 | chr5 | 58,181,510 | 58,181,728 | 218   | Loss  |
| DEL00040800 | chr5 | 58,300,682 | 58,300,848 | 166   | Loss  |
| DEL00040820 | chr5 | 58,537,967 | 58,538,027 | 60    | Loss  |
| DEL00040822 | chr5 | 58,577,093 | 58,577,928 | 835   | Loss  |
| DEL00040834 | chr5 | 58,667,216 | 58,667,319 | 103   | Loss  |
| DEL00040841 | chr5 | 58,693,085 | 58,693,763 | 678   | Loss  |
| DEL00040843 | chr5 | 58,699,288 | 58,699,413 | 125   | Loss  |
| DEL00040876 | chr5 | 59,056,429 | 59,056,481 | 52    | Loss  |
| DEL00040882 | chr5 | 59,112,098 | 59,112,210 | 112   | Loss  |
| DUP00040887 | chr5 | 59,192,659 | 59,193,117 | 458   | Gain  |
| DEL00040888 | chr5 | 59,202,166 | 59,202,240 | 74    | Loss  |
| DUP00040890 | chr5 | 59,238,244 | 59,238,454 | 210   | Gain  |
| DEL00040900 | chr5 | 59,447,597 | 59,449,459 | 1,862 | Loss  |
| DEL00040945 | chr6 | 186,761    | 189,431    | 2,670 | Loss  |
| DUP00040949 | chr6 | 254,836    | 254,948    | 112   | Gain  |
| DEL00040950 | chr6 | 271,342    | 272,417    | 1,075 | Loss  |
| DEL00040956 | chr6 | 322,505    | 322,836    | 331   | Loss  |
| DEL00040957 | chr6 | 324,871    | 324,944    | 73    | Loss  |
| DEL00040961 | chr6 | 413,634    | 413,731    | 97    | Loss  |
| DEL00040970 | chr6 | 483,472    | 483,614    | 142   | Loss  |
| DEL00040971 | chr6 | 494,103    | 494,185    | 82    | Loss  |
| DEL00040979 | chr6 | 578,367    | 578,900    | 533   | Loss  |
| DEL00040981 | chr6 | 593,505    | 593,571    | 66    | Loss  |
| DEL00040986 | chr6 | 665,012    | 666,190    | 1,178 | Loss  |
| DEL00040989 | chr6 | 671,998    | 672,505    | 507   | Loss  |
| DEL00040993 | chr6 | 752,279    | 752,338    | 59    | Loss  |
| DEL00040995 | chr6 | 790,323    | 790,836    | 513   | Loss  |
| DEL00040996 | chr6 | 791,128    | 791,228    | 100   | Loss  |
| DEL00041001 | chr6 | 821,888    | 822,765    | 877   | Loss  |
| DEL00041015 | chr6 | 1,006,210  | 1,007,083  | 873   | Loss  |
| DEL00041027 | chr6 | 1,099,816  | 1,099,965  | 149   | Loss  |
| DEL00041028 | chr6 | 1,118,527  | 1,118,636  | 109   | Loss  |
| DEL00041037 | chr6 | 1,190,377  | 1,190,838  | 461   | Loss  |
| DEL00041045 | chr6 | 1,283,994  | 1,284,219  | 225   | Loss  |
| DEL00041055 | chr6 | 1,488,046  | 1,488,145  | 99    | Loss  |

|             |      |           |           |        |       |
|-------------|------|-----------|-----------|--------|-------|
| DEL00041056 | chr6 | 1,606,584 | 1,606,647 | 63     | Loss  |
| DEL00041061 | chr6 | 1,630,039 | 1,630,269 | 230    | Loss  |
| DEL00041063 | chr6 | 1,635,551 | 1,635,947 | 396    | Loss  |
| DEL00041065 | chr6 | 1,744,156 | 1,744,259 | 103    | Loss  |
| DEL00041066 | chr6 | 1,746,761 | 1,746,826 | 65     | Loss  |
| DEL00041070 | chr6 | 1,791,811 | 1,792,041 | 230    | Loss  |
| DEL00041078 | chr6 | 1,839,869 | 1,840,320 | 451    | Loss  |
| DEL00041079 | chr6 | 1,851,962 | 1,852,071 | 109    | Loss  |
| DEL00041080 | chr6 | 1,852,453 | 1,852,997 | 544    | Loss  |
| DEL00041082 | chr6 | 1,873,728 | 1,874,557 | 829    | Loss  |
| DEL00041087 | chr6 | 1,910,368 | 1,910,813 | 445    | Loss  |
| DEL00041090 | chr6 | 1,946,422 | 1,946,627 | 205    | Loss  |
| DEL00041095 | chr6 | 2,013,276 | 2,013,585 | 309    | Loss  |
| DEL00041096 | chr6 | 2,024,341 | 2,024,412 | 71     | Loss  |
| DEL00041098 | chr6 | 2,055,150 | 2,055,202 | 52     | Loss  |
| DEL00041099 | chr6 | 2,094,277 | 2,094,333 | 56     | Loss  |
| DEL00041105 | chr6 | 2,136,777 | 2,136,845 | 68     | Loss  |
| DEL00041106 | chr6 | 2,215,556 | 2,215,652 | 96     | Loss  |
| DEL00041109 | chr6 | 2,238,100 | 2,238,232 | 132    | Loss  |
| DEL00041113 | chr6 | 2,290,449 | 2,290,566 | 117    | Loss  |
| DEL00041117 | chr6 | 2,309,604 | 2,310,134 | 530    | Loss  |
| DEL00041118 | chr6 | 2,338,098 | 2,338,287 | 189    | Loss  |
| DEL00041125 | chr6 | 2,427,437 | 2,427,997 | 560    | Loss  |
| DEL00041129 | chr6 | 2,510,045 | 2,510,107 | 62     | Loss  |
| DEL00041144 | chr6 | 2,739,101 | 2,739,250 | 149    | Loss  |
| DEL00041146 | chr6 | 2,761,419 | 2,761,489 | 70     | Loss  |
| DEL00041150 | chr6 | 2,783,551 | 2,783,619 | 68     | Loss  |
| DEL00041152 | chr6 | 2,791,423 | 2,791,535 | 112    | Loss  |
| DEL00041168 | chr6 | 3,008,483 | 3,008,643 | 160    | Loss  |
| DEL00041169 | chr6 | 3,021,119 | 3,021,193 | 74     | Loss  |
| DEL00041172 | chr6 | 3,087,116 | 3,087,171 | 55     | Loss  |
| DEL00041176 | chr6 | 3,113,434 | 3,113,511 | 77     | Loss  |
| DEL00041177 | chr6 | 3,141,894 | 3,142,003 | 109    | Loss  |
| DEL00041190 | chr6 | 3,274,265 | 3,275,427 | 1,162  | Loss  |
| DEL00041199 | chr6 | 3,349,402 | 3,349,852 | 450    | Loss  |
| DEL00041234 | chr6 | 3,411,279 | 3,413,059 | 1,780  | Loss  |
| DEL00041237 | chr6 | 3,440,457 | 3,441,237 | 780    | Loss  |
| DEL00041245 | chr6 | 3,538,653 | 3,538,730 | 77     | Loss  |
| DEL00041250 | chr6 | 3,573,904 | 3,574,017 | 113    | Loss  |
| DEL00041251 | chr6 | 3,580,856 | 3,580,917 | 61     | Loss  |
| DEL00041263 | chr6 | 3,783,029 | 3,783,344 | 315    | Loss  |
| DEL00041268 | chr6 | 3,837,185 | 3,837,255 | 70     | Loss  |
| DEL00041269 | chr6 | 3,844,482 | 3,845,394 | 912    | Loss  |
| DEL00041271 | chr6 | 3,853,088 | 3,853,523 | 435    | Loss  |
| DEL00041291 | chr6 | 4,046,743 | 4,048,525 | 1,782  | Loss  |
| DEL00041297 | chr6 | 4,055,876 | 4,056,270 | 394    | Loss  |
| DEL00041304 | chr6 | 4,090,397 | 4,090,752 | 355    | Loss  |
| DEL00041306 | chr6 | 4,110,349 | 4,111,110 | 761    | Loss  |
| DUP00041313 | chr6 | 4,164,980 | 4,183,056 | 18,076 | Mixed |

|             |      |           |           |        |      |
|-------------|------|-----------|-----------|--------|------|
| DEL00041318 | chr6 | 4,189,446 | 4,189,948 | 502    | Loss |
| DEL00041320 | chr6 | 4,237,942 | 4,238,293 | 351    | Loss |
| DEL00041322 | chr6 | 4,239,114 | 4,239,267 | 153    | Loss |
| DEL00041328 | chr6 | 4,293,554 | 4,293,689 | 135    | Loss |
| DEL00041337 | chr6 | 4,364,973 | 4,367,366 | 2,393  | Loss |
| DEL00041350 | chr6 | 4,415,455 | 4,415,842 | 387    | Loss |
| DEL00041354 | chr6 | 4,441,424 | 4,441,525 | 101    | Loss |
| DEL00041356 | chr6 | 4,466,036 | 4,466,094 | 58     | Loss |
| DEL00041365 | chr6 | 4,592,206 | 4,592,297 | 91     | Loss |
| DEL00041374 | chr6 | 4,696,166 | 4,696,898 | 732    | Loss |
| DEL00041380 | chr6 | 4,710,824 | 4,711,176 | 352    | Loss |
| DEL00041383 | chr6 | 4,773,859 | 4,774,567 | 708    | Loss |
| DEL00041384 | chr6 | 4,789,594 | 4,789,660 | 66     | Loss |
| DEL00041385 | chr6 | 4,790,027 | 4,790,363 | 336    | Loss |
| DEL00041386 | chr6 | 4,791,763 | 4,791,826 | 63     | Loss |
| DEL00041387 | chr6 | 4,800,252 | 4,800,316 | 64     | Loss |
| DEL00041395 | chr6 | 4,965,536 | 4,965,805 | 269    | Loss |
| DEL00041400 | chr6 | 5,028,312 | 5,028,408 | 96     | Loss |
| DEL00041401 | chr6 | 5,035,367 | 5,035,535 | 168    | Loss |
| DEL00041402 | chr6 | 5,050,392 | 5,050,935 | 543    | Loss |
| DEL00041403 | chr6 | 5,057,926 | 5,057,984 | 58     | Loss |
| DEL00041408 | chr6 | 5,145,298 | 5,145,404 | 106    | Loss |
| DEL00041422 | chr6 | 5,263,460 | 5,263,512 | 52     | Loss |
| DEL00041429 | chr6 | 5,331,553 | 5,331,634 | 81     | Loss |
| DEL00041434 | chr6 | 5,372,157 | 5,373,549 | 1,392  | Loss |
| DEL00041435 | chr6 | 5,378,073 | 5,378,158 | 85     | Loss |
| DEL00041437 | chr6 | 5,385,458 | 5,385,523 | 65     | Loss |
| DEL00041438 | chr6 | 5,451,944 | 5,452,006 | 62     | Loss |
| DUP00041442 | chr6 | 5,506,305 | 5,517,309 | 11,004 | Gain |
| DEL00041448 | chr6 | 5,578,673 | 5,579,892 | 1,219  | Loss |
| DEL00041464 | chr6 | 5,829,920 | 5,830,338 | 418    | Loss |
| DEL00041466 | chr6 | 5,835,701 | 5,835,771 | 70     | Loss |
| DEL00041467 | chr6 | 5,858,887 | 5,864,020 | 5,133  | Loss |
| DEL00041473 | chr6 | 5,960,809 | 5,960,949 | 140    | Loss |
| DEL00041484 | chr6 | 6,098,825 | 6,098,922 | 97     | Loss |
| DEL00041485 | chr6 | 6,107,691 | 6,107,782 | 91     | Loss |
| DEL00041488 | chr6 | 6,139,833 | 6,140,041 | 208    | Loss |
| DEL00041489 | chr6 | 6,153,796 | 6,153,939 | 143    | Loss |
| DEL00041492 | chr6 | 6,213,792 | 6,214,051 | 259    | Loss |
| DEL00041495 | chr6 | 6,273,797 | 6,274,398 | 601    | Loss |
| DEL00041498 | chr6 | 6,320,386 | 6,320,534 | 148    | Loss |
| DEL00041499 | chr6 | 6,349,971 | 6,350,063 | 92     | Loss |
| DEL00041502 | chr6 | 6,380,794 | 6,381,717 | 923    | Loss |
| DEL00041503 | chr6 | 6,444,076 | 6,444,244 | 168    | Loss |
| DEL00041506 | chr6 | 6,483,676 | 6,484,257 | 581    | Loss |
| DEL00041507 | chr6 | 6,494,214 | 6,495,133 | 919    | Loss |
| DEL00041517 | chr6 | 6,682,401 | 6,682,533 | 132    | Loss |
| DEL00041521 | chr6 | 6,743,890 | 6,744,849 | 959    | Loss |
| DEL00041527 | chr6 | 6,828,055 | 6,828,564 | 509    | Loss |

|             |      |            |            |       |      |
|-------------|------|------------|------------|-------|------|
| DEL00041533 | chr6 | 6,971,572  | 6,971,627  | 55    | Loss |
| DEL00041534 | chr6 | 7,014,711  | 7,014,823  | 112   | Loss |
| DEL00041538 | chr6 | 7,081,653  | 7,081,814  | 161   | Loss |
| DEL00041539 | chr6 | 7,093,000  | 7,093,081  | 81    | Loss |
| DEL00041542 | chr6 | 7,107,632  | 7,107,977  | 345   | Loss |
| DEL00041547 | chr6 | 7,167,310  | 7,167,474  | 164   | Loss |
| DEL00041553 | chr6 | 7,260,699  | 7,261,318  | 619   | Loss |
| DEL00041572 | chr6 | 7,665,980  | 7,666,133  | 153   | Loss |
| DEL00041575 | chr6 | 7,792,968  | 7,793,631  | 663   | Loss |
| DEL00041580 | chr6 | 7,927,161  | 7,927,622  | 461   | Loss |
| DEL00041585 | chr6 | 7,936,755  | 7,937,329  | 574   | Loss |
| DEL00041593 | chr6 | 7,984,062  | 7,984,262  | 200   | Loss |
| DEL00041594 | chr6 | 8,013,340  | 8,013,397  | 57    | Loss |
| DEL00041600 | chr6 | 8,214,316  | 8,214,837  | 521   | Loss |
| DEL00041602 | chr6 | 8,228,099  | 8,228,337  | 238   | Loss |
| DEL00041607 | chr6 | 8,313,081  | 8,313,186  | 105   | Loss |
| DEL00041608 | chr6 | 8,319,154  | 8,320,953  | 1,799 | Loss |
| DEL00041609 | chr6 | 8,361,389  | 8,362,352  | 963   | Loss |
| DEL00041611 | chr6 | 8,378,475  | 8,378,621  | 146   | Loss |
| DEL00041619 | chr6 | 8,602,504  | 8,603,162  | 658   | Loss |
| DEL00041630 | chr6 | 8,850,135  | 8,850,349  | 214   | Loss |
| DEL00041631 | chr6 | 8,864,785  | 8,864,882  | 97    | Loss |
| DEL00041633 | chr6 | 8,883,411  | 8,883,551  | 140   | Loss |
| DEL00041634 | chr6 | 8,887,145  | 8,887,306  | 161   | Loss |
| DEL00041637 | chr6 | 8,895,365  | 8,895,835  | 470   | Loss |
| DEL00041639 | chr6 | 9,063,036  | 9,063,570  | 534   | Loss |
| DEL00041640 | chr6 | 9,080,311  | 9,080,371  | 60    | Loss |
| DEL00041650 | chr6 | 9,314,687  | 9,314,879  | 192   | Loss |
| DEL00041653 | chr6 | 9,384,702  | 9,384,861  | 159   | Loss |
| DEL00041658 | chr6 | 9,692,536  | 9,693,374  | 838   | Loss |
| DEL00041668 | chr6 | 9,852,239  | 9,852,539  | 300   | Loss |
| DEL00041673 | chr6 | 9,892,527  | 9,896,092  | 3,565 | Loss |
| DEL00041698 | chr6 | 10,284,394 | 10,284,487 | 93    | Loss |
| DEL00041700 | chr6 | 10,303,003 | 10,303,092 | 89    | Loss |
| DEL00041702 | chr6 | 10,420,498 | 10,421,765 | 1,267 | Loss |
| DEL00041710 | chr6 | 10,553,025 | 10,553,107 | 82    | Loss |
| DEL00041713 | chr6 | 10,592,750 | 10,592,995 | 245   | Loss |
| DEL00041714 | chr6 | 10,600,601 | 10,600,697 | 96    | Loss |
| DEL00041720 | chr6 | 10,799,865 | 10,800,494 | 629   | Loss |
| DEL00041744 | chr6 | 11,001,746 | 11,002,245 | 499   | Loss |
| DEL00041761 | chr6 | 11,485,463 | 11,485,976 | 513   | Loss |
| DEL00041771 | chr6 | 11,667,469 | 11,667,537 | 68    | Loss |
| DEL00041799 | chr6 | 12,225,570 | 12,225,641 | 71    | Loss |
| DEL00041806 | chr6 | 12,314,173 | 12,314,297 | 124   | Loss |
| DEL00041808 | chr6 | 12,399,955 | 12,400,023 | 68    | Loss |
| DEL00041816 | chr6 | 12,554,487 | 12,555,470 | 983   | Loss |
| DEL00041821 | chr6 | 12,823,456 | 12,824,597 | 1,141 | Loss |
| DEL00041832 | chr6 | 12,962,376 | 12,962,484 | 108   | Loss |
| DEL00041833 | chr6 | 13,065,959 | 13,066,171 | 212   | Loss |

|             |      |            |            |       |      |
|-------------|------|------------|------------|-------|------|
| DEL00041837 | chr6 | 13,088,746 | 13,089,138 | 392   | Loss |
| DEL00041838 | chr6 | 13,092,519 | 13,092,662 | 143   | Loss |
| DEL00041842 | chr6 | 13,184,252 | 13,184,566 | 314   | Loss |
| DEL00041843 | chr6 | 13,222,854 | 13,224,090 | 1,236 | Loss |
| DEL00041846 | chr6 | 13,452,454 | 13,453,911 | 1,457 | Loss |
| DEL00041848 | chr6 | 13,634,868 | 13,635,478 | 610   | Loss |
| DEL00041849 | chr6 | 13,639,558 | 13,640,035 | 477   | Loss |
| DEL00041852 | chr6 | 13,722,758 | 13,722,940 | 182   | Loss |
| DEL00041870 | chr6 | 14,009,258 | 14,009,453 | 195   | Loss |
| DEL00041875 | chr6 | 14,093,817 | 14,094,870 | 1,053 | Loss |
| DEL00041885 | chr6 | 14,199,641 | 14,200,130 | 489   | Loss |
| DEL00041891 | chr6 | 14,507,150 | 14,507,570 | 420   | Loss |
| DEL00041897 | chr6 | 14,678,459 | 14,679,554 | 1,095 | Loss |
| DEL00041898 | chr6 | 14,685,793 | 14,685,878 | 85    | Loss |
| DEL00041899 | chr6 | 14,705,497 | 14,706,570 | 1,073 | Loss |
| DEL00041903 | chr6 | 14,763,203 | 14,763,472 | 269   | Loss |
| DEL00041906 | chr6 | 14,935,822 | 14,935,873 | 51    | Loss |
| DEL00041914 | chr6 | 15,186,103 | 15,186,217 | 114   | Loss |
| DEL00041917 | chr6 | 15,196,544 | 15,197,159 | 615   | Loss |
| DEL00041929 | chr6 | 15,530,232 | 15,530,352 | 120   | Loss |
| DEL00041932 | chr6 | 15,681,537 | 15,681,935 | 398   | Loss |
| DEL00041938 | chr6 | 15,708,297 | 15,708,625 | 328   | Loss |
| DEL00041941 | chr6 | 15,775,797 | 15,775,859 | 62    | Loss |
| DEL00041946 | chr6 | 15,857,120 | 15,857,424 | 304   | Loss |
| DEL00041949 | chr6 | 15,859,762 | 15,860,238 | 476   | Loss |
| DEL00041960 | chr6 | 16,157,912 | 16,157,989 | 77    | Loss |
| DEL00041963 | chr6 | 16,326,261 | 16,326,350 | 89    | Loss |
| DEL00041967 | chr6 | 16,391,989 | 16,392,216 | 227   | Loss |
| DEL00041973 | chr6 | 16,700,928 | 16,701,261 | 333   | Loss |
| DEL00041974 | chr6 | 16,768,970 | 16,769,184 | 214   | Loss |
| DEL00041975 | chr6 | 17,013,978 | 17,014,589 | 611   | Loss |
| DEL00041981 | chr6 | 17,129,343 | 17,129,419 | 76    | Loss |
| DEL00041982 | chr6 | 17,361,678 | 17,361,750 | 72    | Loss |
| DEL00041993 | chr6 | 17,493,001 | 17,493,148 | 147   | Loss |
| DEL00041994 | chr6 | 17,494,605 | 17,501,741 | 7,136 | Loss |
| DEL00042000 | chr6 | 17,521,268 | 17,521,917 | 649   | Loss |
| DEL00042001 | chr6 | 17,570,611 | 17,570,686 | 75    | Loss |
| DEL00042003 | chr6 | 17,604,348 | 17,604,600 | 252   | Loss |
| DEL00042005 | chr6 | 17,716,049 | 17,716,707 | 658   | Loss |
| DEL00042013 | chr6 | 17,904,151 | 17,909,984 | 5,833 | Loss |
| DEL00042018 | chr6 | 17,973,080 | 17,973,519 | 439   | Loss |
| DEL00042021 | chr6 | 17,996,810 | 17,997,207 | 397   | Loss |
| DEL00042024 | chr6 | 18,068,536 | 18,068,675 | 139   | Loss |
| DEL00042025 | chr6 | 18,069,574 | 18,069,654 | 80    | Loss |
| DEL00042026 | chr6 | 18,148,385 | 18,155,333 | 6,948 | Loss |
| DEL00042032 | chr6 | 18,294,997 | 18,295,207 | 210   | Loss |
| DEL00042036 | chr6 | 18,331,496 | 18,331,571 | 75    | Loss |
| DEL00042038 | chr6 | 18,417,067 | 18,417,181 | 114   | Loss |
| DEL00042040 | chr6 | 18,459,448 | 18,459,584 | 136   | Loss |

|             |      |            |            |        |      |
|-------------|------|------------|------------|--------|------|
| DEL00042041 | chr6 | 18,505,267 | 18,505,655 | 388    | Loss |
| DEL00042043 | chr6 | 18,630,619 | 18,634,175 | 3,556  | Loss |
| DEL00042053 | chr6 | 18,700,346 | 18,700,508 | 162    | Loss |
| DEL00042067 | chr6 | 18,932,935 | 18,933,061 | 126    | Loss |
| DEL00042073 | chr6 | 18,984,743 | 18,984,921 | 178    | Loss |
| DEL00042077 | chr6 | 19,239,506 | 19,239,727 | 221    | Loss |
| DEL00042107 | chr6 | 19,446,604 | 19,446,662 | 58     | Loss |
| DEL00042117 | chr6 | 19,565,774 | 19,565,993 | 219    | Loss |
| DUP00042127 | chr6 | 19,679,709 | 19,679,813 | 104    | Gain |
| DUP00042132 | chr6 | 19,766,851 | 19,778,170 | 11,319 | Gain |
| DEL00042134 | chr6 | 19,817,261 | 19,817,729 | 468    | Loss |
| DEL00042136 | chr6 | 19,889,290 | 19,889,719 | 429    | Loss |
| DEL00042138 | chr6 | 19,965,023 | 19,965,202 | 179    | Loss |
| DEL00042139 | chr6 | 20,008,423 | 20,008,919 | 496    | Loss |
| DEL00042141 | chr6 | 20,088,772 | 20,089,502 | 730    | Loss |
| DEL00042144 | chr6 | 20,216,179 | 20,216,284 | 105    | Loss |
| DEL00042145 | chr6 | 20,297,955 | 20,298,035 | 80     | Loss |
| DEL00042146 | chr6 | 20,365,541 | 20,365,641 | 100    | Loss |
| DEL00042152 | chr6 | 20,521,352 | 20,521,559 | 207    | Loss |
| DEL00042154 | chr6 | 20,627,476 | 20,627,540 | 64     | Loss |
| DEL00042156 | chr6 | 20,658,715 | 20,658,773 | 58     | Loss |
| DEL00042157 | chr6 | 20,676,829 | 20,676,991 | 162    | Loss |
| DEL00042158 | chr6 | 20,687,432 | 20,687,574 | 142    | Loss |
| DEL00042163 | chr6 | 20,720,075 | 20,720,370 | 295    | Loss |
| DEL00042164 | chr6 | 20,747,309 | 20,747,396 | 87     | Loss |
| DEL00042171 | chr6 | 21,071,345 | 21,071,568 | 223    | Loss |
| DEL00042172 | chr6 | 21,081,854 | 21,082,000 | 146    | Loss |
| DEL00042174 | chr6 | 21,088,782 | 21,088,848 | 66     | Loss |
| DEL00042180 | chr6 | 21,194,139 | 21,196,080 | 1,941  | Loss |
| DEL00042188 | chr6 | 21,332,377 | 21,332,501 | 124    | Loss |
| DEL00042189 | chr6 | 21,358,204 | 21,358,263 | 59     | Loss |
| DEL00042190 | chr6 | 21,369,341 | 21,369,841 | 500    | Loss |
| DEL00042196 | chr6 | 21,482,059 | 21,482,138 | 79     | Loss |
| DEL00042200 | chr6 | 21,641,052 | 21,641,109 | 57     | Loss |
| DEL00042202 | chr6 | 21,647,276 | 21,647,661 | 385    | Loss |
| DEL00042214 | chr6 | 22,135,779 | 22,136,003 | 224    | Loss |
| DUP00042215 | chr6 | 22,140,359 | 22,140,523 | 164    | Gain |
| DEL00042236 | chr6 | 22,726,065 | 22,726,381 | 316    | Loss |
| DEL00042243 | chr6 | 23,043,355 | 23,044,570 | 1,215  | Loss |
| DEL00042250 | chr6 | 23,147,574 | 23,147,925 | 351    | Loss |
| DEL00042255 | chr6 | 23,169,680 | 23,169,982 | 302    | Loss |
| DEL00042256 | chr6 | 23,195,547 | 23,195,605 | 58     | Loss |
| DEL00042257 | chr6 | 23,207,508 | 23,207,575 | 67     | Loss |
| DEL00042261 | chr6 | 23,254,092 | 23,254,830 | 738    | Loss |
| DEL00042271 | chr6 | 23,537,520 | 23,538,435 | 915    | Loss |
| DEL00042277 | chr6 | 23,543,518 | 23,543,579 | 61     | Loss |
| DEL00042283 | chr6 | 23,655,452 | 23,656,431 | 979    | Loss |
| DEL00042290 | chr6 | 23,902,012 | 23,902,745 | 733    | Loss |
| DEL00042291 | chr6 | 23,911,866 | 23,912,629 | 763    | Loss |

|             |      |            |            |       |      |
|-------------|------|------------|------------|-------|------|
| DEL00042297 | chr6 | 24,056,701 | 24,056,754 | 53    | Loss |
| DEL00042301 | chr6 | 24,102,237 | 24,102,322 | 85    | Loss |
| DEL00042304 | chr6 | 24,112,771 | 24,112,881 | 110   | Loss |
| DEL00042305 | chr6 | 24,154,852 | 24,155,017 | 165   | Loss |
| DEL00042312 | chr6 | 24,224,302 | 24,224,674 | 372   | Loss |
| DEL00042313 | chr6 | 24,259,828 | 24,260,114 | 286   | Loss |
| DEL00042316 | chr6 | 24,381,655 | 24,381,730 | 75    | Loss |
| DEL00042319 | chr6 | 24,496,070 | 24,496,386 | 316   | Loss |
| DEL00042325 | chr6 | 24,653,850 | 24,657,215 | 3,365 | Loss |
| DEL00042330 | chr6 | 24,754,131 | 24,754,191 | 60    | Loss |
| DEL00042333 | chr6 | 24,808,184 | 24,808,357 | 173   | Loss |
| DEL00042334 | chr6 | 24,808,968 | 24,809,022 | 54    | Loss |
| DEL00042344 | chr6 | 24,975,935 | 24,976,006 | 71    | Loss |
| DEL00042352 | chr6 | 25,159,680 | 25,160,360 | 680   | Loss |
| DEL00042353 | chr6 | 25,182,910 | 25,184,487 | 1,577 | Loss |
| DEL00042358 | chr6 | 25,335,163 | 25,335,521 | 358   | Loss |
| DEL00042360 | chr6 | 25,364,301 | 25,364,569 | 268   | Loss |
| DEL00042362 | chr6 | 25,391,670 | 25,391,806 | 136   | Loss |
| DEL00042366 | chr6 | 25,528,462 | 25,528,574 | 112   | Loss |
| DEL00042367 | chr6 | 25,547,897 | 25,548,132 | 235   | Loss |
| DEL00042370 | chr6 | 25,615,362 | 25,615,678 | 316   | Loss |
| DUP00042380 | chr6 | 25,838,252 | 25,838,467 | 215   | Gain |
| DEL00042400 | chr6 | 26,302,506 | 26,303,065 | 559   | Loss |
| DEL00042404 | chr6 | 26,310,034 | 26,310,171 | 137   | Loss |
| DEL00042408 | chr6 | 26,439,628 | 26,439,756 | 128   | Loss |
| DEL00042414 | chr6 | 26,586,700 | 26,586,841 | 141   | Loss |
| DEL00042416 | chr6 | 26,588,937 | 26,589,263 | 326   | Loss |
| DEL00042426 | chr6 | 26,736,269 | 26,736,372 | 103   | Loss |
| DEL00042427 | chr6 | 26,736,961 | 26,737,510 | 549   | Loss |
| DEL00042450 | chr6 | 27,381,775 | 27,382,080 | 305   | Loss |
| DEL00042464 | chr6 | 27,585,760 | 27,585,935 | 175   | Loss |
| DEL00042465 | chr6 | 27,623,977 | 27,624,052 | 75    | Loss |
| DEL00042467 | chr6 | 27,675,458 | 27,675,680 | 222   | Loss |
| DEL00042470 | chr6 | 27,771,699 | 27,771,753 | 54    | Loss |
| DEL00042471 | chr6 | 27,791,509 | 27,791,937 | 428   | Loss |
| DEL00042479 | chr6 | 27,842,903 | 27,843,019 | 116   | Loss |
| DEL00042486 | chr6 | 28,078,875 | 28,078,926 | 51    | Loss |
| DEL00042487 | chr6 | 28,102,903 | 28,102,983 | 80    | Loss |
| DEL00042490 | chr6 | 28,114,261 | 28,114,463 | 202   | Loss |
| DEL00042497 | chr6 | 28,245,179 | 28,245,291 | 112   | Loss |
| DEL00042498 | chr6 | 28,250,510 | 28,250,983 | 473   | Loss |
| DEL00042499 | chr6 | 28,257,343 | 28,257,426 | 83    | Loss |
| DEL00042500 | chr6 | 28,273,352 | 28,273,436 | 84    | Loss |
| DUP00042509 | chr6 | 28,335,894 | 28,344,792 | 8,898 | Gain |
| DEL00042515 | chr6 | 28,470,311 | 28,470,589 | 278   | Loss |
| DEL00042521 | chr6 | 28,543,717 | 28,543,768 | 51    | Loss |
| DEL00042528 | chr6 | 28,816,697 | 28,816,749 | 52    | Loss |
| DEL00042531 | chr6 | 28,914,860 | 28,914,930 | 70    | Loss |
| DEL00042533 | chr6 | 28,937,374 | 28,937,551 | 177   | Loss |

|             |      |            |            |        |      |
|-------------|------|------------|------------|--------|------|
| DEL00042534 | chr6 | 28,958,306 | 28,958,429 | 123    | Loss |
| DEL00042536 | chr6 | 28,962,160 | 28,962,212 | 52     | Loss |
| DEL00042542 | chr6 | 29,109,936 | 29,110,068 | 132    | Loss |
| DEL00042545 | chr6 | 29,255,146 | 29,255,491 | 345    | Loss |
| DEL00042549 | chr6 | 29,357,710 | 29,357,963 | 253    | Loss |
| DEL00042550 | chr6 | 29,383,376 | 29,383,439 | 63     | Loss |
| DEL00042556 | chr6 | 29,431,095 | 29,431,363 | 268    | Loss |
| DUP00042559 | chr6 | 29,539,445 | 29,539,554 | 109    | Gain |
| DEL00042562 | chr6 | 29,561,280 | 29,561,516 | 236    | Loss |
| DEL00042564 | chr6 | 29,641,314 | 29,641,395 | 81     | Loss |
| DEL00042565 | chr6 | 29,644,523 | 29,644,596 | 73     | Loss |
| DEL00042575 | chr6 | 29,797,517 | 29,797,601 | 84     | Loss |
| DEL00042577 | chr6 | 29,857,779 | 29,858,620 | 841    | Loss |
| DEL00042579 | chr6 | 29,943,161 | 29,943,644 | 483    | Loss |
| DUP00042582 | chr6 | 30,131,868 | 30,152,912 | 21,044 | Gain |
| DEL00042585 | chr6 | 30,283,136 | 30,283,236 | 100    | Loss |
| DEL00042590 | chr6 | 30,394,454 | 30,394,603 | 149    | Loss |
| DEL00042591 | chr6 | 30,414,807 | 30,415,713 | 906    | Loss |
| DEL00042594 | chr6 | 30,428,122 | 30,428,178 | 56     | Loss |
| DEL00042601 | chr6 | 30,484,234 | 30,484,433 | 199    | Loss |
| DEL00042609 | chr6 | 30,591,738 | 30,591,849 | 111    | Loss |
| DEL00042610 | chr6 | 30,644,149 | 30,644,302 | 153    | Loss |
| DEL00042611 | chr6 | 30,655,614 | 30,655,758 | 144    | Loss |
| DEL00042620 | chr6 | 30,815,802 | 30,816,243 | 441    | Loss |
| DEL00042621 | chr6 | 30,824,448 | 30,824,661 | 213    | Loss |
| DEL00042627 | chr6 | 30,916,413 | 30,916,488 | 75     | Loss |
| DEL00042628 | chr6 | 30,968,701 | 30,968,893 | 192    | Loss |
| DEL00042643 | chr6 | 31,133,181 | 31,133,617 | 436    | Loss |
| DEL00042644 | chr6 | 31,138,280 | 31,138,389 | 109    | Loss |
| DEL00042646 | chr6 | 31,235,920 | 31,246,904 | 10,984 | Loss |
| DEL00042654 | chr6 | 31,359,301 | 31,359,414 | 113    | Loss |
| DEL00042659 | chr6 | 31,555,346 | 31,555,402 | 56     | Loss |
| DEL00042663 | chr6 | 31,638,931 | 31,639,018 | 87     | Loss |
| DEL00042672 | chr6 | 31,826,715 | 31,826,871 | 156    | Loss |
| DEL00042678 | chr6 | 31,930,979 | 31,931,121 | 142    | Loss |
| DEL00042690 | chr6 | 32,103,368 | 32,103,940 | 572    | Loss |
| DEL00042699 | chr6 | 32,167,276 | 32,167,434 | 158    | Loss |
| DEL00042709 | chr6 | 32,393,470 | 32,393,655 | 185    | Loss |
| DEL00042710 | chr6 | 32,399,721 | 32,402,111 | 2,390  | Loss |
| DEL00042712 | chr6 | 32,443,891 | 32,443,980 | 89     | Loss |
| DEL00042721 | chr6 | 32,576,584 | 32,577,104 | 520    | Loss |
| DEL00042726 | chr6 | 32,627,074 | 32,627,231 | 157    | Loss |
| DEL00042730 | chr6 | 32,699,509 | 32,699,711 | 202    | Loss |
| DEL00042731 | chr6 | 32,719,737 | 32,719,866 | 129    | Loss |
| DEL00042739 | chr6 | 32,804,155 | 32,804,209 | 54     | Loss |
| DEL00042743 | chr6 | 32,877,802 | 32,878,750 | 948    | Loss |
| DEL00042746 | chr6 | 32,949,994 | 32,950,248 | 254    | Loss |
| DEL00042748 | chr6 | 32,983,572 | 32,983,681 | 109    | Loss |
| DUP00042752 | chr6 | 33,077,271 | 33,077,430 | 159    | Gain |



|             |      |            |            |        |       |
|-------------|------|------------|------------|--------|-------|
| DEL00042764 | chr6 | 33,152,049 | 33,152,187 | 138    | Loss  |
| DEL00042769 | chr6 | 33,169,038 | 33,169,699 | 661    | Loss  |
| DEL00042777 | chr6 | 33,229,388 | 33,229,507 | 119    | Loss  |
| DEL00042785 | chr6 | 33,273,085 | 33,273,173 | 88     | Loss  |
| DEL00042803 | chr6 | 33,749,743 | 33,749,942 | 199    | Loss  |
| DEL00042806 | chr6 | 33,921,061 | 33,921,293 | 232    | Loss  |
| DEL00042807 | chr6 | 33,928,966 | 33,929,466 | 500    | Loss  |
| DEL00042834 | chr6 | 34,327,595 | 34,327,861 | 266    | Loss  |
| DEL00042837 | chr6 | 34,339,677 | 34,339,943 | 266    | Loss  |
| DEL00042845 | chr6 | 34,380,489 | 34,381,436 | 947    | Loss  |
| DEL00042876 | chr6 | 34,675,812 | 34,676,967 | 1,155  | Loss  |
| DEL00042882 | chr6 | 34,709,055 | 34,709,711 | 656    | Loss  |
| DEL00042883 | chr6 | 34,738,870 | 34,739,299 | 429    | Loss  |
| DEL00042890 | chr6 | 34,865,845 | 34,865,924 | 79     | Loss  |
| DEL00042896 | chr6 | 34,901,261 | 34,901,360 | 99     | Loss  |
| DEL00042897 | chr6 | 34,901,807 | 34,902,066 | 259    | Loss  |
| DEL00042904 | chr6 | 35,047,633 | 35,048,404 | 771    | Loss  |
| DEL00042912 | chr7 | 75,522     | 75,691     | 169    | Loss  |
| DEL00042915 | chr7 | 76,905     | 77,187     | 282    | Loss  |
| DEL00042916 | chr7 | 77,365     | 77,423     | 58     | Loss  |
| DEL00042922 | chr7 | 184,009    | 184,160    | 151    | Loss  |
| DEL00042923 | chr7 | 219,334    | 220,191    | 857    | Loss  |
| DEL00042939 | chr7 | 529,662    | 530,564    | 902    | Loss  |
| DEL00042940 | chr7 | 533,278    | 533,417    | 139    | Loss  |
| DEL00042945 | chr7 | 551,406    | 551,540    | 134    | Loss  |
| DEL00042951 | chr7 | 621,995    | 622,433    | 438    | Loss  |
| DUP00042954 | chr7 | 646,764    | 662,000    | 15,236 | Mixed |
| DEL00042959 | chr7 | 768,844    | 769,460    | 616    | Loss  |
| DEL00042963 | chr7 | 916,875    | 917,059    | 184    | Loss  |
| DEL00042964 | chr7 | 943,446    | 943,866    | 420    | Loss  |
| DEL00042965 | chr7 | 998,201    | 998,254    | 53     | Loss  |
| DEL00042966 | chr7 | 1,001,462  | 1,001,522  | 60     | Loss  |
| DEL00042973 | chr7 | 1,112,853  | 1,112,930  | 77     | Loss  |
| DEL00042975 | chr7 | 1,180,849  | 1,181,862  | 1,013  | Loss  |
| DEL00042977 | chr7 | 1,212,225  | 1,212,327  | 102    | Loss  |
| DEL00042978 | chr7 | 1,212,386  | 1,212,540  | 154    | Loss  |
| DEL00042979 | chr7 | 1,235,014  | 1,235,191  | 177    | Loss  |
| DEL00042984 | chr7 | 1,442,159  | 1,442,412  | 253    | Loss  |
| DEL00042985 | chr7 | 1,453,900  | 1,453,960  | 60     | Loss  |
| DEL00042989 | chr7 | 1,509,283  | 1,509,527  | 244    | Loss  |
| DEL00042990 | chr7 | 1,523,981  | 1,524,079  | 98     | Loss  |
| DUP00042991 | chr7 | 1,534,191  | 1,534,280  | 89     | Gain  |
| DEL00042992 | chr7 | 1,540,884  | 1,545,195  | 4,311  | Loss  |
| DEL00043007 | chr7 | 1,698,432  | 1,698,519  | 87     | Loss  |
| DEL00043012 | chr7 | 1,726,427  | 1,726,495  | 68     | Loss  |
| DEL00043017 | chr7 | 1,751,996  | 1,752,102  | 106    | Loss  |
| DEL00043021 | chr7 | 1,847,866  | 1,848,012  | 146    | Loss  |
| DEL00043033 | chr7 | 2,009,144  | 2,009,216  | 72     | Loss  |
| DEL00043038 | chr7 | 2,078,784  | 2,078,884  | 100    | Loss  |

|             |      |           |           |        |      |
|-------------|------|-----------|-----------|--------|------|
| DEL00043039 | chr7 | 2,122,646 | 2,122,930 | 284    | Loss |
| DEL00043041 | chr7 | 2,131,936 | 2,132,521 | 585    | Loss |
| DEL00043043 | chr7 | 2,147,636 | 2,147,689 | 53     | Loss |
| DEL00043044 | chr7 | 2,159,287 | 2,159,675 | 388    | Loss |
| DEL00043045 | chr7 | 2,180,367 | 2,180,449 | 82     | Loss |
| DEL00043046 | chr7 | 2,187,934 | 2,188,016 | 82     | Loss |
| DEL00043049 | chr7 | 2,214,463 | 2,214,522 | 59     | Loss |
| DEL00043052 | chr7 | 2,301,178 | 2,301,250 | 72     | Loss |
| DEL00043054 | chr7 | 2,326,365 | 2,326,539 | 174    | Loss |
| DEL00043056 | chr7 | 2,378,326 | 2,378,418 | 92     | Loss |
| DEL00043058 | chr7 | 2,445,874 | 2,445,992 | 118    | Loss |
| DEL00043059 | chr7 | 2,449,117 | 2,449,172 | 55     | Loss |
| DEL00043063 | chr7 | 2,518,994 | 2,519,185 | 191    | Loss |
| DEL00043064 | chr7 | 2,520,052 | 2,520,165 | 113    | Loss |
| DEL00043068 | chr7 | 2,551,839 | 2,551,927 | 88     | Loss |
| DEL00043074 | chr7 | 2,617,122 | 2,617,247 | 125    | Loss |
| DEL00043075 | chr7 | 2,666,544 | 2,667,141 | 597    | Loss |
| DEL00043076 | chr7 | 2,675,119 | 2,675,417 | 298    | Loss |
| DEL00043078 | chr7 | 2,725,064 | 2,725,250 | 186    | Loss |
| DEL00043084 | chr7 | 2,805,575 | 2,805,637 | 62     | Loss |
| DEL00043087 | chr7 | 2,884,931 | 2,885,163 | 232    | Loss |
| DEL00043088 | chr7 | 2,906,003 | 2,906,091 | 88     | Loss |
| DEL00043093 | chr7 | 3,077,350 | 3,078,268 | 918    | Loss |
| DEL00043099 | chr7 | 3,134,362 | 3,134,424 | 62     | Loss |
| DEL00043101 | chr7 | 3,245,601 | 3,246,070 | 469    | Loss |
| DEL00043111 | chr7 | 3,457,996 | 3,458,267 | 271    | Loss |
| DEL00043123 | chr7 | 3,743,359 | 3,743,922 | 563    | Loss |
| DEL00043129 | chr7 | 3,897,600 | 3,898,020 | 420    | Loss |
| DEL00043133 | chr7 | 3,969,791 | 3,969,852 | 61     | Loss |
| DEL00043134 | chr7 | 4,056,281 | 4,056,378 | 97     | Loss |
| DEL00043139 | chr7 | 4,127,261 | 4,127,898 | 637    | Loss |
| DEL00043143 | chr7 | 4,146,275 | 4,146,523 | 248    | Loss |
| DEL00043145 | chr7 | 4,167,554 | 4,167,617 | 63     | Loss |
| DEL00043146 | chr7 | 4,206,065 | 4,206,828 | 763    | Loss |
| DEL00043151 | chr7 | 4,309,091 | 4,309,163 | 72     | Loss |
| DEL00043156 | chr7 | 4,472,663 | 4,472,846 | 183    | Loss |
| DEL00043157 | chr7 | 4,498,038 | 4,498,151 | 113    | Loss |
| DEL00043158 | chr7 | 4,504,461 | 4,504,596 | 135    | Loss |
| DEL00043159 | chr7 | 4,506,315 | 4,506,454 | 139    | Loss |
| DEL00043160 | chr7 | 4,506,831 | 4,506,996 | 165    | Loss |
| DEL00043161 | chr7 | 4,510,912 | 4,511,025 | 113    | Loss |
| DEL00043162 | chr7 | 4,522,416 | 4,523,393 | 977    | Loss |
| DUP00043164 | chr7 | 4,570,692 | 4,593,919 | 23,227 | Gain |
| DEL00043167 | chr7 | 4,661,862 | 4,663,264 | 1,402  | Loss |
| DEL00043174 | chr7 | 4,790,348 | 4,790,420 | 72     | Loss |
| DEL00043178 | chr7 | 4,926,431 | 4,926,526 | 95     | Loss |
| DEL00043188 | chr7 | 5,153,521 | 5,153,644 | 123    | Loss |
| DEL00043191 | chr7 | 5,209,995 | 5,210,051 | 56     | Loss |
| DEL00043195 | chr7 | 5,262,133 | 5,262,827 | 694    | Loss |

|             |      |            |            |       |      |
|-------------|------|------------|------------|-------|------|
| DEL00043196 | chr7 | 5,270,342  | 5,270,395  | 53    | Loss |
| DEL00043197 | chr7 | 5,287,786  | 5,287,980  | 194   | Loss |
| DEL00043199 | chr7 | 5,307,677  | 5,308,088  | 411   | Loss |
| DEL00043210 | chr7 | 5,569,145  | 5,569,226  | 81    | Loss |
| DEL00043218 | chr7 | 5,670,307  | 5,670,671  | 364   | Loss |
| DEL00043229 | chr7 | 5,806,075  | 5,806,267  | 192   | Loss |
| DEL00043236 | chr7 | 5,852,590  | 5,852,688  | 98    | Loss |
| DEL00043243 | chr7 | 5,861,442  | 5,861,564  | 122   | Loss |
| DEL00043251 | chr7 | 5,951,924  | 5,952,029  | 105   | Loss |
| DEL00043252 | chr7 | 5,978,676  | 5,978,738  | 62    | Loss |
| DEL00043256 | chr7 | 6,209,587  | 6,209,645  | 58    | Loss |
| DEL00043263 | chr7 | 6,399,994  | 6,400,270  | 276   | Loss |
| DEL00043272 | chr7 | 6,664,309  | 6,664,383  | 74    | Loss |
| DEL00043275 | chr7 | 6,779,572  | 6,780,532  | 960   | Loss |
| DEL00043282 | chr7 | 6,974,303  | 6,981,189  | 6,886 | Loss |
| DEL00043306 | chr7 | 7,688,679  | 7,689,394  | 715   | Loss |
| DEL00043314 | chr7 | 7,928,036  | 7,928,092  | 56    | Loss |
| DEL00043328 | chr7 | 8,305,623  | 8,305,687  | 64    | Loss |
| DEL00043332 | chr7 | 8,421,848  | 8,422,200  | 352   | Loss |
| DEL00043341 | chr7 | 8,561,095  | 8,561,878  | 783   | Loss |
| DEL00043342 | chr7 | 8,563,314  | 8,563,414  | 100   | Loss |
| DEL00043346 | chr7 | 8,600,136  | 8,600,493  | 357   | Loss |
| DEL00043351 | chr7 | 8,617,489  | 8,617,547  | 58    | Loss |
| DUP00043352 | chr7 | 8,633,998  | 8,634,095  | 97    | Gain |
| DEL00043355 | chr7 | 8,707,742  | 8,711,710  | 3,968 | Loss |
| DEL00043359 | chr7 | 8,738,410  | 8,738,962  | 552   | Loss |
| DEL00043364 | chr7 | 8,796,594  | 8,796,664  | 70    | Loss |
| DEL00043365 | chr7 | 8,811,512  | 8,811,621  | 109   | Loss |
| DEL00043367 | chr7 | 8,869,237  | 8,869,299  | 62    | Loss |
| DEL00043383 | chr7 | 9,144,078  | 9,144,209  | 131   | Loss |
| DUP00043387 | chr7 | 9,195,329  | 9,200,172  | 4,843 | Gain |
| DEL00043392 | chr7 | 9,290,036  | 9,290,147  | 111   | Loss |
| DEL00043411 | chr7 | 9,478,600  | 9,479,257  | 657   | Loss |
| DEL00043413 | chr7 | 9,491,437  | 9,491,570  | 133   | Loss |
| DEL00043415 | chr7 | 9,534,986  | 9,535,491  | 505   | Loss |
| DEL00043416 | chr7 | 9,566,394  | 9,566,710  | 316   | Loss |
| DEL00043421 | chr7 | 9,575,630  | 9,575,940  | 310   | Loss |
| DEL00043422 | chr7 | 9,585,867  | 9,585,999  | 132   | Loss |
| DEL00043427 | chr7 | 9,606,480  | 9,606,534  | 54    | Loss |
| DEL00043428 | chr7 | 9,623,597  | 9,623,655  | 58    | Loss |
| DEL00043433 | chr7 | 9,673,246  | 9,673,680  | 434   | Loss |
| DEL00043438 | chr7 | 9,721,121  | 9,721,172  | 51    | Loss |
| DEL00043440 | chr7 | 9,756,342  | 9,756,515  | 173   | Loss |
| DEL00043450 | chr7 | 9,846,914  | 9,847,669  | 755   | Loss |
| DEL00043451 | chr7 | 9,883,165  | 9,883,237  | 72    | Loss |
| DEL00043452 | chr7 | 9,908,596  | 9,908,683  | 87    | Loss |
| DEL00043460 | chr7 | 10,129,625 | 10,129,764 | 139   | Loss |
| DEL00043464 | chr7 | 10,201,245 | 10,201,484 | 239   | Loss |
| DEL00043468 | chr7 | 10,279,079 | 10,279,160 | 81    | Loss |

|             |      |            |            |        |      |
|-------------|------|------------|------------|--------|------|
| DEL00043469 | chr7 | 10,283,124 | 10,283,218 | 94     | Loss |
| DEL00043474 | chr7 | 10,365,489 | 10,366,017 | 528    | Loss |
| DEL00043497 | chr7 | 10,706,193 | 10,706,350 | 157    | Loss |
| DEL00043500 | chr7 | 10,723,546 | 10,723,607 | 61     | Loss |
| DEL00043501 | chr7 | 10,725,416 | 10,725,495 | 79     | Loss |
| DEL00043502 | chr7 | 10,742,540 | 10,742,648 | 108    | Loss |
| DEL00043504 | chr7 | 10,782,065 | 10,782,556 | 491    | Loss |
| DUP00043516 | chr7 | 10,826,367 | 10,826,773 | 406    | Gain |
| DEL00043528 | chr7 | 10,901,551 | 10,901,683 | 132    | Loss |
| DEL00043530 | chr7 | 10,936,327 | 10,936,502 | 175    | Loss |
| DEL00043534 | chr7 | 11,037,039 | 11,037,093 | 54     | Loss |
| DUP00043539 | chr7 | 11,248,096 | 11,284,995 | 36,899 | Gain |
| DEL00043541 | chr7 | 11,290,818 | 11,290,914 | 96     | Loss |
| DEL00043543 | chr7 | 11,376,456 | 11,376,545 | 89     | Loss |
| DEL00043544 | chr7 | 11,380,124 | 11,380,187 | 63     | Loss |
| DEL00043546 | chr7 | 11,398,219 | 11,398,360 | 141    | Loss |
| DEL00043550 | chr7 | 11,495,800 | 11,497,517 | 1,717  | Loss |
| DEL00043555 | chr7 | 11,592,390 | 11,592,600 | 210    | Loss |
| DEL00043562 | chr7 | 11,678,613 | 11,678,733 | 120    | Loss |
| DEL00043564 | chr7 | 11,689,324 | 11,689,393 | 69     | Loss |
| DEL00043570 | chr7 | 11,756,460 | 11,756,532 | 72     | Loss |
| DEL00043577 | chr7 | 11,903,573 | 11,903,715 | 142    | Loss |
| DEL00043579 | chr7 | 11,955,999 | 11,956,909 | 910    | Loss |
| DEL00043584 | chr7 | 12,009,759 | 12,009,815 | 56     | Loss |
| DEL00043585 | chr7 | 12,031,575 | 12,031,645 | 70     | Loss |
| DEL00043591 | chr7 | 12,197,017 | 12,198,796 | 1,779  | Loss |
| DEL00043594 | chr7 | 12,315,865 | 12,315,954 | 89     | Loss |
| DEL00043596 | chr7 | 12,400,588 | 12,401,165 | 577    | Loss |
| DEL00043599 | chr7 | 12,533,455 | 12,533,658 | 203    | Loss |
| DEL00043603 | chr7 | 12,579,845 | 12,580,187 | 342    | Loss |
| DEL00043605 | chr7 | 12,597,125 | 12,597,188 | 63     | Loss |
| DUP00043608 | chr7 | 12,643,081 | 12,656,495 | 13,414 | Gain |
| DEL00043622 | chr7 | 12,813,107 | 12,816,032 | 2,925  | Loss |
| DEL00043624 | chr7 | 12,879,160 | 12,879,574 | 414    | Loss |
| DEL00043626 | chr7 | 12,944,928 | 12,945,067 | 139    | Loss |
| DEL00043628 | chr7 | 12,964,887 | 12,964,969 | 82     | Loss |
| DEL00043631 | chr7 | 13,017,844 | 13,018,186 | 342    | Loss |
| DEL00043634 | chr7 | 13,059,640 | 13,060,801 | 1,161  | Loss |
| DEL00043637 | chr7 | 13,088,823 | 13,088,949 | 126    | Loss |
| DEL00043645 | chr7 | 13,237,521 | 13,238,138 | 617    | Loss |
| DEL00043646 | chr7 | 13,253,353 | 13,253,509 | 156    | Loss |
| DEL00043652 | chr7 | 13,454,747 | 13,454,908 | 161    | Loss |
| DEL00043663 | chr7 | 13,613,341 | 13,613,549 | 208    | Loss |
| DEL00043672 | chr7 | 13,730,568 | 13,730,906 | 338    | Loss |
| DEL00043673 | chr7 | 13,808,753 | 13,808,853 | 100    | Loss |
| DEL00043674 | chr7 | 13,817,492 | 13,817,577 | 85     | Loss |
| DEL00043681 | chr7 | 13,896,354 | 13,897,012 | 658    | Loss |
| DEL00043686 | chr7 | 13,952,679 | 13,952,881 | 202    | Loss |
| DEL00043689 | chr7 | 13,994,085 | 13,994,566 | 481    | Loss |

|             |      |            |            |        |      |
|-------------|------|------------|------------|--------|------|
| DEL00043696 | chr7 | 14,138,863 | 14,138,969 | 106    | Loss |
| DEL00043697 | chr7 | 14,155,100 | 14,155,900 | 800    | Loss |
| DEL00043699 | chr7 | 14,181,654 | 14,182,345 | 691    | Loss |
| DEL00043702 | chr7 | 14,217,893 | 14,218,181 | 288    | Loss |
| DEL00043705 | chr7 | 14,273,008 | 14,273,061 | 53     | Loss |
| DEL00043706 | chr7 | 14,307,578 | 14,308,200 | 622    | Loss |
| DEL00043708 | chr7 | 14,323,901 | 14,325,280 | 1,379  | Loss |
| DEL00043710 | chr7 | 14,367,272 | 14,367,648 | 376    | Loss |
| DEL00043714 | chr7 | 14,401,506 | 14,416,354 | 14,848 | Loss |
| DEL00043717 | chr7 | 14,459,326 | 14,459,710 | 384    | Loss |
| DEL00043718 | chr7 | 14,469,528 | 14,469,880 | 352    | Loss |
| DEL00043723 | chr7 | 14,531,257 | 14,531,488 | 231    | Loss |
| DEL00043727 | chr7 | 14,597,165 | 14,597,299 | 134    | Loss |
| DEL00043737 | chr7 | 14,669,885 | 14,670,155 | 270    | Loss |
| DEL00043742 | chr7 | 14,912,892 | 14,912,954 | 62     | Loss |
| DEL00043751 | chr7 | 15,055,386 | 15,055,526 | 140    | Loss |
| DEL00043753 | chr7 | 15,060,896 | 15,061,217 | 321    | Loss |
| DEL00043756 | chr7 | 15,114,630 | 15,115,357 | 727    | Loss |
| DEL00043762 | chr7 | 15,218,781 | 15,218,839 | 58     | Loss |
| DEL00043763 | chr7 | 15,260,891 | 15,261,717 | 826    | Loss |
| DEL00043764 | chr7 | 15,264,158 | 15,264,914 | 756    | Loss |
| DEL00043767 | chr7 | 15,338,244 | 15,338,295 | 51     | Loss |
| DEL00043774 | chr7 | 15,442,573 | 15,442,654 | 81     | Loss |
| DUP00043778 | chr7 | 15,495,068 | 15,495,218 | 150    | Gain |
| DEL00043779 | chr7 | 15,497,413 | 15,498,057 | 644    | Loss |
| DEL00043782 | chr7 | 15,537,323 | 15,537,604 | 281    | Loss |
| DEL00043790 | chr7 | 15,770,806 | 15,770,984 | 178    | Loss |
| DEL00043799 | chr7 | 16,112,930 | 16,113,182 | 252    | Loss |
| DEL00043804 | chr7 | 16,218,257 | 16,218,474 | 217    | Loss |
| DEL00043805 | chr7 | 16,267,425 | 16,267,650 | 225    | Loss |
| DEL00043806 | chr7 | 16,309,449 | 16,309,567 | 118    | Loss |
| DEL00043810 | chr7 | 16,452,527 | 16,453,019 | 492    | Loss |
| DEL00043813 | chr7 | 16,513,599 | 16,513,670 | 71     | Loss |
| DEL00043816 | chr7 | 16,649,361 | 16,649,964 | 603    | Loss |
| DEL00043821 | chr7 | 16,662,770 | 16,663,258 | 488    | Loss |
| DEL00043833 | chr7 | 16,770,881 | 16,772,295 | 1,414  | Loss |
| DEL00043838 | chr7 | 16,812,941 | 16,813,246 | 305    | Loss |
| DEL00043850 | chr7 | 17,044,178 | 17,044,355 | 177    | Loss |
| DEL00043853 | chr7 | 17,063,507 | 17,063,681 | 174    | Loss |
| DEL00043854 | chr7 | 17,069,545 | 17,069,605 | 60     | Loss |
| DEL00043855 | chr7 | 17,071,191 | 17,071,245 | 54     | Loss |
| DEL00043862 | chr7 | 17,305,700 | 17,307,628 | 1,928  | Loss |
| DEL00043863 | chr7 | 17,336,910 | 17,337,772 | 862    | Loss |
| DEL00043871 | chr7 | 17,462,561 | 17,463,252 | 691    | Loss |
| DEL00043872 | chr7 | 17,469,736 | 17,469,815 | 79     | Loss |
| DEL00043878 | chr7 | 17,530,222 | 17,530,374 | 152    | Loss |
| DEL00043879 | chr7 | 17,556,702 | 17,556,771 | 69     | Loss |
| DEL00043885 | chr7 | 17,731,797 | 17,732,382 | 585    | Loss |
| DEL00043889 | chr7 | 17,777,734 | 17,777,796 | 62     | Loss |

|             |      |            |            |        |      |
|-------------|------|------------|------------|--------|------|
| DEL00043895 | chr7 | 17,846,644 | 17,848,426 | 1,782  | Loss |
| DEL00043899 | chr7 | 17,913,538 | 17,913,641 | 103    | Loss |
| DEL00043902 | chr7 | 17,941,168 | 17,941,609 | 441    | Loss |
| DUP00043903 | chr7 | 17,943,737 | 17,943,813 | 76     | Gain |
| DEL00043904 | chr7 | 17,957,820 | 17,958,444 | 624    | Loss |
| DEL00043907 | chr7 | 18,039,723 | 18,039,785 | 62     | Loss |
| DEL00043911 | chr7 | 18,080,910 | 18,081,249 | 339    | Loss |
| DEL00043916 | chr7 | 18,157,664 | 18,157,904 | 240    | Loss |
| DEL00043919 | chr7 | 18,194,811 | 18,195,353 | 542    | Loss |
| DEL00043920 | chr7 | 18,223,478 | 18,226,313 | 2,835  | Loss |
| DEL00043922 | chr7 | 18,258,317 | 18,258,885 | 568    | Loss |
| DEL00043924 | chr7 | 18,302,427 | 18,303,174 | 747    | Loss |
| DEL00043928 | chr7 | 18,363,023 | 18,363,106 | 83     | Loss |
| DEL00043932 | chr7 | 18,411,798 | 18,411,908 | 110    | Loss |
| DEL00043933 | chr7 | 18,417,562 | 18,417,694 | 132    | Loss |
| DEL00043942 | chr7 | 18,765,731 | 18,767,149 | 1,418  | Loss |
| DEL00043948 | chr7 | 18,803,378 | 18,803,832 | 454    | Loss |
| DEL00043950 | chr7 | 18,817,078 | 18,817,133 | 55     | Loss |
| DEL00043952 | chr7 | 18,827,196 | 18,827,305 | 109    | Loss |
| DEL00043953 | chr7 | 18,828,714 | 18,828,822 | 108    | Loss |
| DEL00043960 | chr7 | 18,975,399 | 18,975,869 | 470    | Loss |
| DEL00043962 | chr7 | 18,999,485 | 18,999,658 | 173    | Loss |
| DEL00043966 | chr7 | 19,039,150 | 19,039,346 | 196    | Loss |
| DEL00043977 | chr7 | 19,211,742 | 19,211,998 | 256    | Loss |
| DEL00043978 | chr7 | 19,234,962 | 19,235,086 | 124    | Loss |
| DEL00043979 | chr7 | 19,243,667 | 19,243,723 | 56     | Loss |
| DEL00043984 | chr7 | 19,347,223 | 19,348,458 | 1,235  | Loss |
| DEL00043993 | chr7 | 19,590,300 | 19,590,404 | 104    | Loss |
| DEL00044000 | chr7 | 19,685,702 | 19,685,861 | 159    | Loss |
| DEL00044001 | chr7 | 19,692,956 | 19,693,469 | 513    | Loss |
| DEL00044003 | chr7 | 19,697,284 | 19,697,336 | 52     | Loss |
| DEL00044012 | chr7 | 19,837,189 | 19,838,441 | 1,252  | Loss |
| DUP00044017 | chr7 | 19,965,679 | 19,980,256 | 14,577 | Gain |
| DEL00044021 | chr7 | 20,086,326 | 20,086,389 | 63     | Loss |
| DEL00044029 | chr7 | 20,164,106 | 20,164,184 | 78     | Loss |
| DEL00044046 | chr7 | 20,525,911 | 20,525,988 | 77     | Loss |
| DUP00044055 | chr7 | 20,607,620 | 20,620,558 | 12,938 | Gain |
| DEL00044059 | chr7 | 20,644,164 | 20,644,233 | 69     | Loss |
| DEL00044065 | chr7 | 20,867,029 | 20,867,630 | 601    | Loss |
| DEL00044066 | chr7 | 20,877,534 | 20,877,589 | 55     | Loss |
| DEL00044067 | chr7 | 20,914,642 | 20,914,814 | 172    | Loss |
| DEL00044071 | chr7 | 21,122,730 | 21,123,275 | 545    | Loss |
| DEL00044087 | chr7 | 21,397,499 | 21,397,615 | 116    | Loss |
| DEL00044106 | chr7 | 21,462,195 | 21,465,663 | 3,468  | Loss |
| DEL00044125 | chr7 | 21,758,147 | 21,758,233 | 86     | Loss |
| DEL00044130 | chr7 | 21,862,031 | 21,862,188 | 157    | Loss |
| DEL00044131 | chr7 | 21,935,397 | 21,935,452 | 55     | Loss |
| DEL00044134 | chr7 | 22,024,018 | 22,024,095 | 77     | Loss |
| DEL00044136 | chr7 | 22,030,836 | 22,030,952 | 116    | Loss |

|             |      |            |            |        |      |
|-------------|------|------------|------------|--------|------|
| DEL00044138 | chr7 | 22,049,675 | 22,049,837 | 162    | Loss |
| DEL00044142 | chr7 | 22,227,829 | 22,227,915 | 86     | Loss |
| DEL00044146 | chr7 | 22,315,687 | 22,315,782 | 95     | Loss |
| DEL00044149 | chr7 | 22,336,251 | 22,336,693 | 442    | Loss |
| DEL00044155 | chr7 | 22,391,197 | 22,391,348 | 151    | Loss |
| DEL00044166 | chr7 | 22,530,563 | 22,530,739 | 176    | Loss |
| DEL00044169 | chr7 | 22,556,894 | 22,557,156 | 262    | Loss |
| DEL00044174 | chr7 | 22,733,579 | 22,733,665 | 86     | Loss |
| DEL00044180 | chr7 | 22,828,938 | 22,829,551 | 613    | Loss |
| DEL00044184 | chr7 | 23,097,531 | 23,097,676 | 145    | Loss |
| DEL00044187 | chr7 | 23,100,812 | 23,100,879 | 67     | Loss |
| DEL00044190 | chr7 | 23,113,341 | 23,113,462 | 121    | Loss |
| DEL00044195 | chr7 | 23,194,395 | 23,194,456 | 61     | Loss |
| DEL00044205 | chr7 | 23,323,062 | 23,326,614 | 3,552  | Loss |
| DEL00044206 | chr7 | 23,391,725 | 23,391,850 | 125    | Loss |
| DEL00044210 | chr7 | 23,468,389 | 23,468,467 | 78     | Loss |
| DEL00044214 | chr7 | 23,555,981 | 23,556,545 | 564    | Loss |
| DEL00044220 | chr7 | 23,670,046 | 23,672,033 | 1,987  | Loss |
| DEL00044223 | chr7 | 23,687,357 | 23,687,555 | 198    | Loss |
| DEL00044224 | chr7 | 23,713,597 | 23,713,680 | 83     | Loss |
| DEL00044226 | chr7 | 23,744,998 | 23,745,531 | 533    | Loss |
| DEL00044231 | chr7 | 23,971,362 | 23,971,423 | 61     | Loss |
| DEL00044234 | chr7 | 24,062,093 | 24,062,257 | 164    | Loss |
| DEL00044240 | chr7 | 24,108,034 | 24,108,574 | 540    | Loss |
| DUP00044242 | chr7 | 24,109,092 | 24,123,253 | 14,161 | Gain |
| DEL00044248 | chr7 | 24,136,441 | 24,137,163 | 722    | Loss |
| DEL00044251 | chr7 | 24,159,534 | 24,159,838 | 304    | Loss |
| DEL00044255 | chr7 | 24,188,477 | 24,188,534 | 57     | Loss |
| DEL00044259 | chr7 | 24,222,267 | 24,222,696 | 429    | Loss |
| DEL00044265 | chr7 | 24,256,282 | 24,256,530 | 248    | Loss |
| DEL00044268 | chr7 | 24,277,181 | 24,277,247 | 66     | Loss |
| DEL00044269 | chr7 | 24,283,400 | 24,283,679 | 279    | Loss |
| DEL00044278 | chr7 | 24,416,523 | 24,417,877 | 1,354  | Loss |
| DEL00044283 | chr7 | 24,438,196 | 24,438,270 | 74     | Loss |
| DEL00044291 | chr7 | 24,795,597 | 24,795,781 | 184    | Loss |
| DEL00044295 | chr7 | 24,821,318 | 24,821,797 | 479    | Loss |
| DEL00044297 | chr7 | 24,830,223 | 24,830,285 | 62     | Loss |
| DEL00044298 | chr7 | 24,830,313 | 24,830,440 | 127    | Loss |
| DEL00044301 | chr7 | 24,851,144 | 24,851,228 | 84     | Loss |
| DEL00044302 | chr7 | 24,871,287 | 24,871,664 | 377    | Loss |
| DEL00044315 | chr7 | 25,087,072 | 25,087,222 | 150    | Loss |
| DEL00044316 | chr7 | 25,207,706 | 25,207,799 | 93     | Loss |
| DEL00044325 | chr7 | 25,340,950 | 25,341,119 | 169    | Loss |
| DEL00044329 | chr7 | 25,434,320 | 25,434,818 | 498    | Loss |
| DEL00044339 | chr7 | 25,712,670 | 25,712,736 | 66     | Loss |
| DEL00044341 | chr7 | 25,735,900 | 25,735,968 | 68     | Loss |
| DEL00044350 | chr7 | 25,920,585 | 25,920,715 | 130    | Loss |
| DEL00044356 | chr7 | 26,146,675 | 26,150,069 | 3,394  | Loss |
| DEL00044358 | chr7 | 26,180,467 | 26,180,806 | 339    | Loss |

|             |      |            |            |       |      |
|-------------|------|------------|------------|-------|------|
| DEL00044359 | chr7 | 26,184,405 | 26,185,948 | 1,543 | Loss |
| DEL00044364 | chr7 | 26,443,696 | 26,444,075 | 379   | Loss |
| DEL00044371 | chr7 | 26,605,066 | 26,605,144 | 78    | Loss |
| DEL00044383 | chr7 | 26,811,366 | 26,811,563 | 197   | Loss |
| DEL00044391 | chr7 | 26,921,236 | 26,921,296 | 60    | Loss |
| DEL00044392 | chr7 | 26,994,720 | 26,994,795 | 75    | Loss |
| DEL00044394 | chr7 | 27,139,038 | 27,139,096 | 58    | Loss |
| DEL00044396 | chr7 | 27,233,104 | 27,233,285 | 181   | Loss |
| DEL00044400 | chr7 | 27,273,970 | 27,274,029 | 59    | Loss |
| DEL00044405 | chr7 | 27,410,678 | 27,410,862 | 184   | Loss |
| DEL00044421 | chr7 | 27,481,894 | 27,483,204 | 1,310 | Loss |
| DEL00044430 | chr7 | 27,644,201 | 27,644,263 | 62    | Loss |
| DEL00044436 | chr7 | 27,852,182 | 27,852,272 | 90    | Loss |
| DEL00044448 | chr7 | 28,036,542 | 28,038,956 | 2,414 | Loss |
| DEL00044454 | chr7 | 28,275,533 | 28,275,674 | 141   | Loss |
| DEL00044455 | chr7 | 28,358,202 | 28,358,866 | 664   | Loss |
| DEL00044458 | chr7 | 28,433,774 | 28,433,906 | 132   | Loss |
| DEL00044460 | chr7 | 28,463,600 | 28,463,788 | 188   | Loss |
| DEL00044462 | chr7 | 28,476,739 | 28,476,936 | 197   | Loss |
| DEL00044465 | chr7 | 28,563,988 | 28,564,306 | 318   | Loss |
| DEL00044466 | chr7 | 28,612,448 | 28,614,375 | 1,927 | Loss |
| DEL00044467 | chr7 | 28,623,500 | 28,624,486 | 986   | Loss |
| DEL00044468 | chr7 | 28,671,112 | 28,671,168 | 56    | Loss |
| DEL00044469 | chr7 | 28,680,886 | 28,681,399 | 513   | Loss |
| DEL00044470 | chr7 | 28,685,951 | 28,686,440 | 489   | Loss |
| DEL00044472 | chr7 | 28,693,061 | 28,693,182 | 121   | Loss |
| DEL00044479 | chr7 | 28,782,837 | 28,783,364 | 527   | Loss |
| DEL00044482 | chr7 | 28,818,099 | 28,818,157 | 58    | Loss |
| DEL00044485 | chr7 | 28,831,873 | 28,834,284 | 2,411 | Loss |
| DEL00044486 | chr7 | 28,839,208 | 28,840,051 | 843   | Loss |
| DEL00044490 | chr7 | 28,853,916 | 28,854,339 | 423   | Loss |
| DEL00044491 | chr7 | 28,860,848 | 28,861,105 | 257   | Loss |
| DEL00044497 | chr7 | 28,914,377 | 28,914,626 | 249   | Loss |
| DEL00044504 | chr7 | 28,981,760 | 28,982,498 | 738   | Loss |
| DEL00044508 | chr7 | 29,000,095 | 29,003,059 | 2,964 | Loss |
| DEL00044511 | chr7 | 29,088,954 | 29,089,407 | 453   | Loss |
| DEL00044512 | chr7 | 29,089,595 | 29,089,661 | 66    | Loss |
| DEL00044515 | chr7 | 29,128,593 | 29,129,088 | 495   | Loss |
| DEL00044516 | chr7 | 29,181,297 | 29,181,386 | 89    | Loss |
| DEL00044517 | chr7 | 29,184,724 | 29,187,075 | 2,351 | Loss |
| DEL00044532 | chr7 | 29,399,191 | 29,399,871 | 680   | Loss |
| DEL00044534 | chr7 | 29,416,196 | 29,416,759 | 563   | Loss |
| DEL00044541 | chr7 | 29,725,142 | 29,725,243 | 101   | Loss |
| DEL00044550 | chr7 | 29,862,425 | 29,862,816 | 391   | Loss |
| DEL00044553 | chr7 | 29,946,680 | 29,947,465 | 785   | Loss |
| DEL00044557 | chr7 | 30,074,889 | 30,075,683 | 794   | Loss |
| DEL00044560 | chr7 | 30,128,530 | 30,128,704 | 174   | Loss |
| DEL00044561 | chr7 | 30,143,006 | 30,143,070 | 64    | Loss |
| DEL00044568 | chr7 | 30,230,592 | 30,231,178 | 586   | Loss |



|             |      |            |            |        |      |
|-------------|------|------------|------------|--------|------|
| DEL00044577 | chr7 | 30,475,010 | 30,475,099 | 89     | Loss |
| DEL00044583 | chr7 | 30,625,954 | 30,626,105 | 151    | Loss |
| DEL00044585 | chr7 | 30,713,913 | 30,714,100 | 187    | Loss |
| DEL00044593 | chr7 | 30,921,332 | 30,921,392 | 60     | Loss |
| DEL00044594 | chr7 | 30,952,864 | 30,953,001 | 137    | Loss |
| DEL00044597 | chr7 | 31,001,935 | 31,002,019 | 84     | Loss |
| DEL00044603 | chr7 | 31,084,892 | 31,085,189 | 297    | Loss |
| DEL00044608 | chr7 | 31,118,613 | 31,118,693 | 80     | Loss |
| DEL00044611 | chr7 | 31,164,210 | 31,164,342 | 132    | Loss |
| DEL00044618 | chr7 | 31,309,981 | 31,310,164 | 183    | Loss |
| DEL00044619 | chr7 | 31,310,323 | 31,310,419 | 96     | Loss |
| DEL00044620 | chr7 | 31,403,586 | 31,404,641 | 1,055  | Loss |
| DEL00044623 | chr7 | 31,449,661 | 31,449,814 | 153    | Loss |
| DEL00044626 | chr7 | 31,532,258 | 31,532,588 | 330    | Loss |
| DEL00044634 | chr7 | 31,657,560 | 31,657,624 | 64     | Loss |
| DEL00044636 | chr7 | 31,693,737 | 31,693,994 | 257    | Loss |
| DEL00044640 | chr7 | 31,774,131 | 31,774,505 | 374    | Loss |
| DUP00044645 | chr7 | 32,015,515 | 32,050,581 | 35,066 | Gain |
| DEL00044647 | chr7 | 32,056,048 | 32,056,101 | 53     | Loss |
| DEL00044651 | chr7 | 32,166,717 | 32,166,883 | 166    | Loss |
| DEL00044654 | chr7 | 32,230,517 | 32,231,176 | 659    | Loss |
| DEL00044674 | chr7 | 32,679,022 | 32,680,235 | 1,213  | Loss |
| DEL00044684 | chr7 | 33,012,819 | 33,012,986 | 167    | Loss |
| DEL00044692 | chr7 | 33,122,337 | 33,122,416 | 79     | Loss |
| DEL00044693 | chr7 | 33,134,244 | 33,134,309 | 65     | Loss |
| DEL00044696 | chr7 | 33,159,015 | 33,159,107 | 92     | Loss |
| DEL00044704 | chr7 | 33,289,796 | 33,289,931 | 135    | Loss |
| DEL00044710 | chr7 | 33,519,021 | 33,519,249 | 228    | Loss |
| DUP00044711 | chr7 | 33,521,504 | 33,521,859 | 355    | Gain |
| DEL00044716 | chr7 | 33,582,649 | 33,582,824 | 175    | Loss |
| DEL00044720 | chr7 | 33,601,885 | 33,602,040 | 155    | Loss |
| DEL00044722 | chr7 | 33,625,007 | 33,625,257 | 250    | Loss |
| DEL00044730 | chr7 | 33,734,505 | 33,734,576 | 71     | Loss |
| DEL00044739 | chr7 | 33,968,240 | 33,968,650 | 410    | Loss |
| DEL00044742 | chr7 | 34,023,058 | 34,023,127 | 69     | Loss |
| DEL00044744 | chr7 | 34,085,525 | 34,085,721 | 196    | Loss |
| DEL00044748 | chr7 | 34,129,023 | 34,129,133 | 110    | Loss |
| DEL00044757 | chr7 | 34,260,341 | 34,260,437 | 96     | Loss |
| DEL00044769 | chr7 | 34,370,661 | 34,370,789 | 128    | Loss |
| DEL00044774 | chr7 | 34,428,695 | 34,428,750 | 55     | Loss |
| DEL00044780 | chr7 | 34,462,671 | 34,463,388 | 717    | Loss |
| DEL00044783 | chr7 | 34,468,566 | 34,468,839 | 273    | Loss |
| DEL00044794 | chr7 | 34,569,333 | 34,569,473 | 140    | Loss |
| DEL00044799 | chr7 | 34,594,931 | 34,595,058 | 127    | Loss |
| DEL00044805 | chr7 | 34,679,610 | 34,679,698 | 88     | Loss |
| DEL00044808 | chr7 | 34,708,266 | 34,709,830 | 1,564  | Loss |
| DEL00044817 | chr7 | 34,717,818 | 34,717,920 | 102    | Loss |
| DEL00044818 | chr7 | 34,718,526 | 34,718,625 | 99     | Loss |
| DEL00044819 | chr7 | 34,723,492 | 34,723,560 | 68     | Loss |

|             |      |            |            |       |      |
|-------------|------|------------|------------|-------|------|
| DUP00044820 | chr7 | 34,724,564 | 34,724,720 | 156   | Gain |
| DEL00044822 | chr7 | 34,748,607 | 34,748,709 | 102   | Loss |
| DUP00044838 | chr7 | 34,818,537 | 34,819,396 | 859   | Gain |
| DEL00044854 | chr7 | 35,098,770 | 35,098,845 | 75    | Loss |
| DUP00044885 | chr7 | 35,320,574 | 35,320,739 | 165   | Gain |
| DEL00044896 | chr7 | 35,451,544 | 35,451,978 | 434   | Loss |
| DEL00044902 | chr7 | 35,553,389 | 35,553,531 | 142   | Loss |
| DEL00044908 | chr7 | 35,665,194 | 35,665,253 | 59    | Loss |
| DEL00044912 | chr7 | 35,744,126 | 35,744,222 | 96    | Loss |
| DEL00044913 | chr7 | 35,750,965 | 35,751,063 | 98    | Loss |
| DEL00044918 | chr7 | 35,859,255 | 35,859,748 | 493   | Loss |
| DEL00044931 | chr7 | 36,246,801 | 36,247,313 | 512   | Loss |
| DEL00044935 | chr7 | 36,248,670 | 36,249,578 | 908   | Loss |
| DEL00044957 | chr8 | 17,832     | 18,676     | 844   | Loss |
| DEL00044973 | chr8 | 585,505    | 588,147    | 2,642 | Loss |
| DEL00044975 | chr8 | 670,560    | 670,622    | 62    | Loss |
| DEL00044980 | chr8 | 757,823    | 759,225    | 1,402 | Loss |
| DEL00044983 | chr8 | 915,567    | 915,621    | 54    | Loss |
| DEL00044989 | chr8 | 1,005,748  | 1,006,315  | 567   | Loss |
| DEL00044993 | chr8 | 1,047,738  | 1,048,094  | 356   | Loss |
| DEL00044995 | chr8 | 1,070,331  | 1,070,490  | 159   | Loss |
| DEL00045015 | chr8 | 1,297,013  | 1,297,208  | 195   | Loss |
| DEL00045016 | chr8 | 1,346,495  | 1,346,595  | 100   | Loss |
| DEL00045021 | chr8 | 1,381,829  | 1,382,214  | 385   | Loss |
| DEL00045031 | chr8 | 1,481,982  | 1,482,242  | 260   | Loss |
| DEL00045040 | chr8 | 1,656,587  | 1,656,653  | 66    | Loss |
| DEL00045041 | chr8 | 1,657,905  | 1,657,958  | 53    | Loss |
| DEL00045043 | chr8 | 1,725,345  | 1,725,413  | 68    | Loss |
| DEL00045044 | chr8 | 1,816,600  | 1,816,820  | 220   | Loss |
| DEL00045045 | chr8 | 1,840,402  | 1,840,873  | 471   | Loss |
| DEL00045046 | chr8 | 1,893,115  | 1,893,368  | 253   | Loss |
| DEL00045048 | chr8 | 1,914,612  | 1,914,668  | 56    | Loss |
| DEL00045052 | chr8 | 1,966,609  | 1,969,428  | 2,819 | Loss |
| DEL00045063 | chr8 | 2,070,299  | 2,070,551  | 252   | Loss |
| DEL00045066 | chr8 | 2,103,835  | 2,103,971  | 136   | Loss |
| DEL00045069 | chr8 | 2,181,043  | 2,181,791  | 748   | Loss |
| DEL00045072 | chr8 | 2,243,336  | 2,243,589  | 253   | Loss |
| DEL00045073 | chr8 | 2,300,515  | 2,302,007  | 1,492 | Loss |
| DEL00045075 | chr8 | 2,330,323  | 2,330,988  | 665   | Loss |
| DEL00045076 | chr8 | 2,347,644  | 2,347,793  | 149   | Loss |
| DEL00045077 | chr8 | 2,370,170  | 2,370,283  | 113   | Loss |
| DEL00045090 | chr8 | 2,583,633  | 2,583,939  | 306   | Loss |
| DEL00045096 | chr8 | 2,634,771  | 2,635,080  | 309   | Loss |
| DEL00045099 | chr8 | 2,657,858  | 2,659,433  | 1,575 | Loss |
| DEL00045102 | chr8 | 2,707,045  | 2,707,097  | 52    | Loss |
| DEL00045120 | chr8 | 2,910,462  | 2,911,589  | 1,127 | Loss |
| DEL00045132 | chr8 | 3,113,170  | 3,114,288  | 1,118 | Loss |
| DEL00045135 | chr8 | 3,136,342  | 3,136,430  | 88    | Loss |
| DEL00045143 | chr8 | 3,191,436  | 3,191,652  | 216   | Loss |

|             |      |           |           |        |      |
|-------------|------|-----------|-----------|--------|------|
| DEL00045145 | chr8 | 3,195,004 | 3,195,160 | 156    | Loss |
| DEL00045157 | chr8 | 3,301,911 | 3,303,485 | 1,574  | Loss |
| DEL00045158 | chr8 | 3,307,515 | 3,307,567 | 52     | Loss |
| DEL00045167 | chr8 | 3,401,697 | 3,401,981 | 284    | Loss |
| DEL00045169 | chr8 | 3,425,477 | 3,426,468 | 991    | Loss |
| DEL00045183 | chr8 | 3,674,990 | 3,675,214 | 224    | Loss |
| DEL00045187 | chr8 | 3,734,079 | 3,734,170 | 91     | Loss |
| DEL00045188 | chr8 | 3,841,717 | 3,841,788 | 71     | Loss |
| DEL00045191 | chr8 | 3,888,309 | 3,888,377 | 68     | Loss |
| DUP00045192 | chr8 | 3,898,712 | 3,898,790 | 78     | Gain |
| DUP00045195 | chr8 | 3,909,922 | 3,910,097 | 175    | Gain |
| DEL00045201 | chr8 | 4,049,261 | 4,050,213 | 952    | Loss |
| DEL00045205 | chr8 | 4,126,903 | 4,126,961 | 58     | Loss |
| DEL00045219 | chr8 | 4,316,694 | 4,316,769 | 75     | Loss |
| DEL00045221 | chr8 | 4,347,985 | 4,348,255 | 270    | Loss |
| DEL00045222 | chr8 | 4,387,034 | 4,387,293 | 259    | Loss |
| DEL00045230 | chr8 | 4,603,425 | 4,603,477 | 52     | Loss |
| DEL00045232 | chr8 | 4,670,857 | 4,670,918 | 61     | Loss |
| DEL00045233 | chr8 | 4,792,088 | 4,792,162 | 74     | Loss |
| DEL00045235 | chr8 | 4,835,016 | 4,835,179 | 163    | Loss |
| DEL00045240 | chr8 | 4,875,215 | 4,875,284 | 69     | Loss |
| DEL00045242 | chr8 | 4,951,841 | 4,952,054 | 213    | Loss |
| DEL00045246 | chr8 | 5,089,212 | 5,089,807 | 595    | Loss |
| DEL00045249 | chr8 | 5,159,244 | 5,159,364 | 120    | Loss |
| DEL00045255 | chr8 | 5,361,307 | 5,361,395 | 88     | Loss |
| DEL00045265 | chr8 | 5,525,989 | 5,526,143 | 154    | Loss |
| DEL00045278 | chr8 | 5,856,500 | 5,856,565 | 65     | Loss |
| DEL00045288 | chr8 | 6,108,271 | 6,108,608 | 337    | Loss |
| DEL00045311 | chr8 | 6,771,131 | 6,771,711 | 580    | Loss |
| DEL00045320 | chr8 | 6,939,051 | 6,939,743 | 692    | Loss |
| DEL00045326 | chr8 | 7,124,426 | 7,124,550 | 124    | Loss |
| DEL00045327 | chr8 | 7,124,832 | 7,125,969 | 1,137  | Loss |
| DEL00045350 | chr8 | 7,513,233 | 7,513,304 | 71     | Loss |
| DEL00045351 | chr8 | 7,518,847 | 7,519,441 | 594    | Loss |
| DEL00045363 | chr8 | 7,713,439 | 7,713,508 | 69     | Loss |
| DEL00045364 | chr8 | 7,777,723 | 7,777,792 | 69     | Loss |
| DEL00045368 | chr8 | 7,808,515 | 7,808,634 | 119    | Loss |
| DEL00045372 | chr8 | 7,966,077 | 7,966,312 | 235    | Loss |
| DEL00045373 | chr8 | 7,972,084 | 7,972,381 | 297    | Loss |
| DEL00045376 | chr8 | 8,023,985 | 8,024,270 | 285    | Loss |
| DEL00045382 | chr8 | 8,194,542 | 8,197,227 | 2,685  | Loss |
| DEL00045386 | chr8 | 8,229,243 | 8,229,386 | 143    | Loss |
| DEL00045387 | chr8 | 8,256,876 | 8,256,958 | 82     | Loss |
| DEL00045391 | chr8 | 8,324,918 | 8,324,980 | 62     | Loss |
| DEL00045394 | chr8 | 8,357,009 | 8,367,532 | 10,523 | Loss |
| DEL00045398 | chr8 | 8,453,120 | 8,453,234 | 114    | Loss |
| DEL00045401 | chr8 | 8,465,794 | 8,466,323 | 529    | Loss |
| DEL00045405 | chr8 | 8,595,337 | 8,596,169 | 832    | Loss |
| DEL00045410 | chr8 | 8,680,360 | 8,680,786 | 426    | Loss |

|             |      |            |            |       |      |
|-------------|------|------------|------------|-------|------|
| DEL00045421 | chr8 | 8,730,780  | 8,730,889  | 109   | Loss |
| DEL00045423 | chr8 | 8,832,222  | 8,832,719  | 497   | Loss |
| DEL00045426 | chr8 | 8,871,099  | 8,871,489  | 390   | Loss |
| DEL00045433 | chr8 | 9,208,057  | 9,210,090  | 2,033 | Loss |
| DEL00045439 | chr8 | 9,239,240  | 9,239,541  | 301   | Loss |
| DEL00045444 | chr8 | 9,286,139  | 9,286,218  | 79    | Loss |
| DUP00045448 | chr8 | 9,353,462  | 9,353,696  | 234   | Gain |
| DEL00045452 | chr8 | 9,408,462  | 9,410,504  | 2,042 | Loss |
| DEL00045453 | chr8 | 9,418,618  | 9,419,455  | 837   | Loss |
| DEL00045465 | chr8 | 9,606,418  | 9,607,663  | 1,245 | Loss |
| DEL00045498 | chr8 | 9,996,189  | 9,998,479  | 2,290 | Loss |
| DEL00045500 | chr8 | 10,004,060 | 10,005,195 | 1,135 | Loss |
| DEL00045502 | chr8 | 10,030,691 | 10,031,128 | 437   | Loss |
| DEL00045519 | chr8 | 10,424,798 | 10,424,862 | 64    | Loss |
| DEL00045529 | chr8 | 10,776,724 | 10,776,910 | 186   | Loss |
| DEL00045543 | chr8 | 10,918,258 | 10,918,417 | 159   | Loss |
| DEL00045556 | chr8 | 11,373,423 | 11,375,536 | 2,113 | Loss |
| DEL00045562 | chr8 | 11,689,751 | 11,689,868 | 117   | Loss |
| DEL00045593 | chr8 | 12,594,334 | 12,595,013 | 679   | Loss |
| DEL00045601 | chr8 | 12,742,590 | 12,742,973 | 383   | Loss |
| DEL00045602 | chr8 | 12,751,022 | 12,751,135 | 113   | Loss |
| DEL00045604 | chr8 | 12,788,077 | 12,788,249 | 172   | Loss |
| DEL00045605 | chr8 | 12,802,597 | 12,803,099 | 502   | Loss |
| DEL00045613 | chr8 | 13,033,519 | 13,039,056 | 5,537 | Loss |
| DEL00045629 | chr8 | 13,260,758 | 13,260,823 | 65    | Loss |
| DEL00045630 | chr8 | 13,266,314 | 13,267,172 | 858   | Loss |
| DEL00045633 | chr8 | 13,295,287 | 13,295,529 | 242   | Loss |
| DEL00045635 | chr8 | 13,309,817 | 13,309,881 | 64    | Loss |
| DEL00045636 | chr8 | 13,310,402 | 13,310,560 | 158   | Loss |
| DEL00045638 | chr8 | 13,388,750 | 13,388,821 | 71    | Loss |
| DEL00045653 | chr8 | 13,572,583 | 13,572,641 | 58    | Loss |
| DEL00045654 | chr8 | 13,616,514 | 13,617,367 | 853   | Loss |
| DEL00045659 | chr8 | 13,676,302 | 13,676,359 | 57    | Loss |
| DEL00045664 | chr8 | 13,848,635 | 13,848,694 | 59    | Loss |
| DEL00045665 | chr8 | 13,849,311 | 13,850,295 | 984   | Loss |
| DEL00045668 | chr8 | 13,885,361 | 13,885,682 | 321   | Loss |
| DEL00045672 | chr8 | 14,023,561 | 14,023,635 | 74    | Loss |
| DEL00045675 | chr8 | 14,054,020 | 14,054,999 | 979   | Loss |
| DEL00045681 | chr8 | 14,142,277 | 14,142,418 | 141   | Loss |
| DEL00045685 | chr8 | 14,296,347 | 14,297,265 | 918   | Loss |
| DEL00045687 | chr8 | 14,324,306 | 14,324,419 | 113   | Loss |
| DEL00045688 | chr8 | 14,346,846 | 14,346,997 | 151   | Loss |
| DEL00045713 | chr8 | 14,702,280 | 14,702,483 | 203   | Loss |
| DEL00045717 | chr8 | 14,778,633 | 14,778,744 | 111   | Loss |
| DEL00045719 | chr8 | 14,886,223 | 14,886,759 | 536   | Loss |
| DEL00045730 | chr8 | 15,122,727 | 15,123,229 | 502   | Loss |
| DEL00045736 | chr8 | 15,164,081 | 15,164,763 | 682   | Loss |
| DEL00045739 | chr8 | 15,176,500 | 15,176,566 | 66    | Loss |
| DEL00045746 | chr8 | 15,358,194 | 15,358,273 | 79    | Loss |

|             |      |            |            |       |      |
|-------------|------|------------|------------|-------|------|
| DEL00045760 | chr8 | 15,604,982 | 15,605,145 | 163   | Loss |
| DEL00045764 | chr8 | 15,792,345 | 15,792,640 | 295   | Loss |
| DEL00045769 | chr8 | 15,922,814 | 15,922,993 | 179   | Loss |
| DEL00045772 | chr8 | 16,124,641 | 16,124,712 | 71    | Loss |
| DEL00045784 | chr8 | 16,235,510 | 16,235,995 | 485   | Loss |
| DEL00045786 | chr8 | 16,252,157 | 16,252,212 | 55    | Loss |
| DEL00045808 | chr8 | 16,408,391 | 16,408,478 | 87    | Loss |
| DEL00045814 | chr8 | 16,532,113 | 16,533,233 | 1,120 | Loss |
| DEL00045817 | chr8 | 16,583,128 | 16,583,547 | 419   | Loss |
| DEL00045819 | chr8 | 16,621,532 | 16,621,621 | 89    | Loss |
| DEL00045826 | chr8 | 16,649,737 | 16,650,249 | 512   | Loss |
| DEL00045833 | chr8 | 16,729,141 | 16,729,202 | 61    | Loss |
| DEL00045841 | chr8 | 16,862,575 | 16,863,058 | 483   | Loss |
| DEL00045848 | chr8 | 16,959,681 | 16,959,757 | 76    | Loss |
| DEL00045866 | chr8 | 17,098,462 | 17,098,560 | 98    | Loss |
| DEL00045869 | chr8 | 17,153,198 | 17,153,973 | 775   | Loss |
| DEL00045892 | chr8 | 17,587,230 | 17,587,282 | 52    | Loss |
| DEL00045899 | chr8 | 17,661,008 | 17,661,068 | 60    | Loss |
| DEL00045900 | chr8 | 17,675,554 | 17,675,969 | 415   | Loss |
| DEL00045905 | chr8 | 17,733,892 | 17,734,059 | 167   | Loss |
| DEL00045906 | chr8 | 17,737,498 | 17,737,582 | 84    | Loss |
| DEL00045913 | chr8 | 17,898,933 | 17,899,084 | 151   | Loss |
| DUP00045918 | chr8 | 18,002,212 | 18,002,272 | 60    | Gain |
| DUP00045922 | chr8 | 18,131,301 | 18,131,403 | 102   | Gain |
| DEL00045926 | chr8 | 18,340,153 | 18,340,219 | 66    | Loss |
| DEL00045929 | chr8 | 18,503,695 | 18,503,940 | 245   | Loss |
| DEL00045931 | chr8 | 18,552,091 | 18,552,168 | 77    | Loss |
| DEL00045933 | chr8 | 18,557,692 | 18,557,805 | 113   | Loss |
| DEL00045943 | chr8 | 18,614,618 | 18,615,445 | 827   | Loss |
| DEL00045945 | chr8 | 18,676,308 | 18,676,590 | 282   | Loss |
| DEL00045946 | chr8 | 18,687,253 | 18,687,622 | 369   | Loss |
| DEL00045951 | chr8 | 18,788,962 | 18,789,611 | 649   | Loss |
| DEL00045960 | chr8 | 18,917,605 | 18,917,951 | 346   | Loss |
| DEL00045968 | chr8 | 19,008,341 | 19,012,454 | 4,113 | Loss |
| DEL00045973 | chr8 | 19,075,469 | 19,075,526 | 57    | Loss |
| DEL00045976 | chr8 | 19,167,712 | 19,167,808 | 96    | Loss |
| DEL00045978 | chr8 | 19,221,075 | 19,221,319 | 244   | Loss |
| DEL00045981 | chr8 | 19,309,739 | 19,309,942 | 203   | Loss |
| DEL00045982 | chr8 | 19,310,246 | 19,310,354 | 108   | Loss |
| DEL00045983 | chr8 | 19,321,346 | 19,321,598 | 252   | Loss |
| DEL00045986 | chr8 | 19,501,036 | 19,501,219 | 183   | Loss |
| DEL00045997 | chr8 | 19,645,807 | 19,646,081 | 274   | Loss |
| DEL00046000 | chr8 | 19,883,542 | 19,883,626 | 84    | Loss |
| DEL00046006 | chr8 | 20,009,279 | 20,009,535 | 256   | Loss |
| DEL00046009 | chr8 | 20,025,520 | 20,025,682 | 162   | Loss |
| DEL00046014 | chr8 | 20,282,411 | 20,282,573 | 162   | Loss |
| DEL00046015 | chr8 | 20,320,470 | 20,320,538 | 68    | Loss |
| DUP00046021 | chr8 | 20,540,734 | 20,541,896 | 1,162 | Gain |
| DEL00046047 | chr8 | 20,820,808 | 20,821,320 | 512   | Loss |

|             |      |            |            |        |      |
|-------------|------|------------|------------|--------|------|
| DEL00046051 | chr8 | 20,880,980 | 20,881,303 | 323    | Loss |
| DEL00046052 | chr8 | 20,933,263 | 20,933,467 | 204    | Loss |
| DEL00046053 | chr8 | 20,936,226 | 20,936,532 | 306    | Loss |
| DEL00046057 | chr8 | 21,063,287 | 21,063,345 | 58     | Loss |
| DEL00046066 | chr8 | 21,369,194 | 21,369,252 | 58     | Loss |
| DEL00046082 | chr8 | 21,792,908 | 21,792,967 | 59     | Loss |
| DEL00046085 | chr8 | 21,871,892 | 21,872,011 | 119    | Loss |
| DEL00046087 | chr8 | 21,898,569 | 21,898,666 | 97     | Loss |
| DEL00046092 | chr8 | 21,985,257 | 21,985,594 | 337    | Loss |
| DEL00046094 | chr8 | 21,990,036 | 21,990,363 | 327    | Loss |
| DEL00046096 | chr8 | 22,014,263 | 22,014,389 | 126    | Loss |
| DEL00046113 | chr8 | 22,403,035 | 22,403,114 | 79     | Loss |
| DEL00046114 | chr8 | 22,408,109 | 22,408,275 | 166    | Loss |
| DEL00046117 | chr8 | 22,465,882 | 22,466,968 | 1,086  | Loss |
| DEL00046122 | chr8 | 22,669,788 | 22,669,846 | 58     | Loss |
| DEL00046129 | chr8 | 22,898,238 | 22,898,371 | 133    | Loss |
| DEL00046130 | chr8 | 22,914,685 | 22,914,739 | 54     | Loss |
| DEL00046132 | chr8 | 22,926,004 | 22,926,087 | 83     | Loss |
| DEL00046133 | chr8 | 22,944,784 | 22,948,144 | 3,360  | Loss |
| DEL00046141 | chr8 | 23,012,939 | 23,013,043 | 104    | Loss |
| DEL00046155 | chr8 | 23,169,348 | 23,169,665 | 317    | Loss |
| DEL00046165 | chr8 | 23,244,764 | 23,244,937 | 173    | Loss |
| DEL00046167 | chr8 | 23,394,508 | 23,394,651 | 143    | Loss |
| DEL00046170 | chr8 | 23,481,609 | 23,481,725 | 116    | Loss |
| DUP00046171 | chr8 | 23,570,689 | 23,591,145 | 20,456 | Gain |
| DEL00046172 | chr8 | 23,645,196 | 23,645,264 | 68     | Loss |
| DEL00046186 | chr8 | 23,858,920 | 23,859,466 | 546    | Loss |
| DEL00046202 | chr8 | 24,245,115 | 24,245,211 | 96     | Loss |
| DEL00046204 | chr8 | 24,258,429 | 24,258,676 | 247    | Loss |
| DEL00046206 | chr8 | 24,261,088 | 24,261,140 | 52     | Loss |
| DEL00046213 | chr8 | 24,402,957 | 24,403,027 | 70     | Loss |
| DEL00046214 | chr8 | 24,408,960 | 24,409,024 | 64     | Loss |
| DEL00046216 | chr8 | 24,423,989 | 24,424,102 | 113    | Loss |
| DEL00046217 | chr8 | 24,425,343 | 24,425,786 | 443    | Loss |
| DEL00046220 | chr8 | 24,435,236 | 24,435,291 | 55     | Loss |
| DEL00046222 | chr8 | 24,535,720 | 24,535,823 | 103    | Loss |
| DEL00046225 | chr8 | 24,560,629 | 24,563,831 | 3,202  | Loss |
| DEL00046228 | chr8 | 24,586,160 | 24,586,576 | 416    | Loss |
| DEL00046237 | chr8 | 24,756,444 | 24,756,666 | 222    | Loss |
| DEL00046238 | chr8 | 24,759,546 | 24,759,610 | 64     | Loss |
| DEL00046241 | chr8 | 24,811,597 | 24,811,691 | 94     | Loss |
| DUP00046242 | chr8 | 24,817,745 | 24,817,843 | 98     | Gain |
| DEL00046243 | chr8 | 24,856,754 | 24,856,806 | 52     | Loss |
| DEL00046244 | chr8 | 24,861,401 | 24,861,660 | 259    | Loss |
| DEL00046254 | chr8 | 25,049,861 | 25,049,959 | 98     | Loss |
| DEL00046257 | chr8 | 25,120,734 | 25,120,789 | 55     | Loss |
| DEL00046261 | chr8 | 25,160,351 | 25,160,642 | 291    | Loss |
| DEL00046263 | chr8 | 25,255,210 | 25,255,401 | 191    | Loss |
| DEL00046264 | chr8 | 25,264,564 | 25,264,618 | 54     | Loss |

|             |      |            |            |       |      |
|-------------|------|------------|------------|-------|------|
| DEL00046269 | chr8 | 25,442,523 | 25,443,179 | 656   | Loss |
| DEL00046275 | chr8 | 25,614,336 | 25,614,416 | 80    | Loss |
| DEL00046279 | chr8 | 25,675,326 | 25,676,214 | 888   | Loss |
| DEL00046287 | chr8 | 25,762,056 | 25,762,533 | 477   | Loss |
| DEL00046289 | chr8 | 25,826,580 | 25,827,069 | 489   | Loss |
| DEL00046291 | chr8 | 25,964,049 | 25,964,270 | 221   | Loss |
| DEL00046304 | chr8 | 26,441,296 | 26,441,377 | 81    | Loss |
| DUP00046332 | chr8 | 26,503,984 | 26,504,109 | 125   | Gain |
| DEL00046333 | chr8 | 26,520,197 | 26,520,590 | 393   | Loss |
| DEL00046334 | chr8 | 26,549,947 | 26,550,052 | 105   | Loss |
| DEL00046339 | chr8 | 26,665,686 | 26,665,741 | 55    | Loss |
| DEL00046341 | chr8 | 26,742,593 | 26,742,756 | 163   | Loss |
| DEL00046342 | chr8 | 26,753,279 | 26,753,530 | 251   | Loss |
| DEL00046351 | chr8 | 27,121,588 | 27,121,695 | 107   | Loss |
| DEL00046352 | chr8 | 27,188,204 | 27,188,949 | 745   | Loss |
| DEL00046354 | chr8 | 27,293,611 | 27,293,744 | 133   | Loss |
| DEL00046359 | chr8 | 27,307,307 | 27,307,623 | 316   | Loss |
| DEL00046372 | chr8 | 27,355,671 | 27,355,788 | 117   | Loss |
| DEL00046373 | chr8 | 27,373,984 | 27,374,148 | 164   | Loss |
| DEL00046374 | chr8 | 27,483,352 | 27,483,461 | 109   | Loss |
| DEL00046379 | chr8 | 27,580,333 | 27,580,791 | 458   | Loss |
| DEL00046392 | chr8 | 27,613,275 | 27,613,575 | 300   | Loss |
| DEL00046395 | chr8 | 27,662,388 | 27,662,679 | 291   | Loss |
| DEL00046399 | chr8 | 27,681,595 | 27,681,770 | 175   | Loss |
| DEL00046402 | chr8 | 27,731,619 | 27,732,024 | 405   | Loss |
| DEL00046427 | chr8 | 27,827,901 | 27,827,955 | 54    | Loss |
| DEL00046428 | chr8 | 27,889,814 | 27,889,869 | 55    | Loss |
| DEL00046436 | chr8 | 27,988,084 | 27,988,312 | 228   | Loss |
| DEL00046437 | chr8 | 27,994,063 | 27,994,413 | 350   | Loss |
| DUP00046438 | chr8 | 27,999,862 | 27,999,972 | 110   | Gain |
| DEL00046444 | chr8 | 28,166,898 | 28,167,007 | 109   | Loss |
| DEL00046453 | chr8 | 28,386,616 | 28,386,860 | 244   | Loss |
| DUP00046454 | chr8 | 28,389,147 | 28,389,318 | 171   | Gain |
| DEL00046461 | chr8 | 28,565,266 | 28,565,332 | 66    | Loss |
| DUP00046471 | chr8 | 28,822,245 | 28,822,370 | 125   | Gain |
| DEL00046475 | chr8 | 28,859,225 | 28,859,335 | 110   | Loss |
| DEL00046477 | chr8 | 28,912,541 | 28,912,663 | 122   | Loss |
| DEL00046479 | chr8 | 28,916,775 | 28,917,261 | 486   | Loss |
| DEL00046483 | chr8 | 28,983,167 | 28,983,565 | 398   | Loss |
| DEL00046501 | chr8 | 29,242,384 | 29,242,708 | 324   | Loss |
| DEL00046503 | chr8 | 29,295,107 | 29,296,121 | 1,014 | Loss |
| DEL00046504 | chr8 | 29,342,304 | 29,342,836 | 532   | Loss |
| DUP00046509 | chr8 | 29,401,968 | 29,402,050 | 82    | Gain |
| DEL00046513 | chr8 | 29,471,492 | 29,474,142 | 2,650 | Loss |
| DEL00046517 | chr9 | 5,616      | 5,714      | 98    | Loss |
| DEL00046527 | chr9 | 234,611    | 234,674    | 63    | Loss |
| DEL00046528 | chr9 | 235,320    | 235,422    | 102   | Loss |
| DEL00046530 | chr9 | 262,296    | 262,370    | 74    | Loss |
| DEL00046531 | chr9 | 268,385    | 268,485    | 100   | Loss |

|             |      |           |           |        |      |
|-------------|------|-----------|-----------|--------|------|
| DEL00046537 | chr9 | 527,447   | 527,797   | 350    | Loss |
| DEL00046540 | chr9 | 605,886   | 605,963   | 77     | Loss |
| DEL00046553 | chr9 | 878,983   | 879,305   | 322    | Loss |
| DEL00046565 | chr9 | 1,122,296 | 1,122,585 | 289    | Loss |
| DEL00046574 | chr9 | 1,307,342 | 1,307,402 | 60     | Loss |
| DEL00046577 | chr9 | 1,358,674 | 1,358,760 | 86     | Loss |
| DEL00046579 | chr9 | 1,360,869 | 1,361,171 | 302    | Loss |
| DEL00046587 | chr9 | 1,491,539 | 1,493,632 | 2,093  | Loss |
| DEL00046588 | chr9 | 1,497,962 | 1,498,258 | 296    | Loss |
| DEL00046590 | chr9 | 1,631,904 | 1,632,062 | 158    | Loss |
| DEL00046599 | chr9 | 1,772,035 | 1,772,159 | 124    | Loss |
| DEL00046603 | chr9 | 1,846,472 | 1,846,575 | 103    | Loss |
| DEL00046614 | chr9 | 1,964,739 | 1,964,845 | 106    | Loss |
| DEL00046616 | chr9 | 2,018,221 | 2,018,391 | 170    | Loss |
| DEL00046626 | chr9 | 2,148,101 | 2,148,232 | 131    | Loss |
| DEL00046630 | chr9 | 2,185,026 | 2,185,161 | 135    | Loss |
| DEL00046634 | chr9 | 2,194,762 | 2,196,194 | 1,432  | Loss |
| DEL00046635 | chr9 | 2,198,478 | 2,199,469 | 991    | Loss |
| DEL00046636 | chr9 | 2,201,469 | 2,201,573 | 104    | Loss |
| DEL00046637 | chr9 | 2,202,416 | 2,203,194 | 778    | Loss |
| DEL00046649 | chr9 | 2,333,822 | 2,334,037 | 215    | Loss |
| DEL00046653 | chr9 | 2,387,115 | 2,387,204 | 89     | Loss |
| DEL00046654 | chr9 | 2,424,876 | 2,424,956 | 80     | Loss |
| DEL00046658 | chr9 | 2,455,784 | 2,456,123 | 339    | Loss |
| DEL00046664 | chr9 | 2,504,466 | 2,504,592 | 126    | Loss |
| DEL00046670 | chr9 | 2,533,637 | 2,534,428 | 791    | Loss |
| DEL00046676 | chr9 | 2,561,035 | 2,561,110 | 75     | Loss |
| DEL00046680 | chr9 | 2,591,456 | 2,591,896 | 440    | Loss |
| DEL00046694 | chr9 | 2,678,639 | 2,678,691 | 52     | Loss |
| DEL00046695 | chr9 | 2,684,429 | 2,685,941 | 1,512  | Loss |
| DEL00046699 | chr9 | 2,739,775 | 2,740,002 | 227    | Loss |
| DEL00046711 | chr9 | 2,866,587 | 2,866,770 | 183    | Loss |
| DEL00046714 | chr9 | 2,895,669 | 2,895,897 | 228    | Loss |
| DEL00046733 | chr9 | 2,984,578 | 2,985,169 | 591    | Loss |
| DEL00046739 | chr9 | 3,117,029 | 3,117,137 | 108    | Loss |
| DEL00046742 | chr9 | 3,158,927 | 3,159,043 | 116    | Loss |
| DEL00046744 | chr9 | 3,186,089 | 3,186,227 | 138    | Loss |
| DEL00046749 | chr9 | 3,331,968 | 3,332,039 | 71     | Loss |
| DEL00046751 | chr9 | 3,368,802 | 3,372,567 | 3,765  | Loss |
| DEL00046752 | chr9 | 3,405,772 | 3,405,835 | 63     | Loss |
| DEL00046757 | chr9 | 3,483,400 | 3,483,704 | 304    | Loss |
| DEL00046769 | chr9 | 3,648,425 | 3,648,526 | 101    | Loss |
| DEL00046771 | chr9 | 3,666,171 | 3,666,753 | 582    | Loss |
| DEL00046774 | chr9 | 3,728,640 | 3,728,828 | 188    | Loss |
| DUP00046789 | chr9 | 3,893,387 | 3,908,511 | 15,124 | Gain |
| DEL00046793 | chr9 | 4,046,080 | 4,046,500 | 420    | Loss |
| DEL00046798 | chr9 | 4,205,395 | 4,205,572 | 177    | Loss |
| DEL00046801 | chr9 | 4,242,280 | 4,242,373 | 93     | Loss |
| DEL00046804 | chr9 | 4,350,464 | 4,351,189 | 725    | Loss |



|             |      |           |           |        |      |
|-------------|------|-----------|-----------|--------|------|
| DEL00046807 | chr9 | 4,418,957 | 4,419,140 | 183    | Loss |
| DEL00046815 | chr9 | 4,529,386 | 4,529,450 | 64     | Loss |
| DEL00046816 | chr9 | 4,532,060 | 4,532,134 | 74     | Loss |
| DEL00046818 | chr9 | 4,566,655 | 4,566,710 | 55     | Loss |
| DEL00046820 | chr9 | 4,637,172 | 4,637,843 | 671    | Loss |
| DEL00046823 | chr9 | 4,701,357 | 4,701,415 | 58     | Loss |
| DEL00046826 | chr9 | 4,864,758 | 4,864,865 | 107    | Loss |
| DEL00046835 | chr9 | 4,982,363 | 4,982,806 | 443    | Loss |
| DEL00046842 | chr9 | 5,081,185 | 5,081,567 | 382    | Loss |
| DEL00046844 | chr9 | 5,095,990 | 5,096,043 | 53     | Loss |
| DEL00046851 | chr9 | 5,167,589 | 5,167,667 | 78     | Loss |
| DEL00046854 | chr9 | 5,262,905 | 5,262,964 | 59     | Loss |
| DEL00046865 | chr9 | 5,455,149 | 5,455,563 | 414    | Loss |
| DEL00046868 | chr9 | 5,473,288 | 5,473,768 | 480    | Loss |
| DEL00046870 | chr9 | 5,560,377 | 5,561,761 | 1,384  | Loss |
| DEL00046873 | chr9 | 5,577,539 | 5,578,506 | 967    | Loss |
| DEL00046874 | chr9 | 5,580,214 | 5,580,316 | 102    | Loss |
| DEL00046880 | chr9 | 5,729,819 | 5,729,913 | 94     | Loss |
| DEL00046881 | chr9 | 5,738,005 | 5,738,292 | 287    | Loss |
| DEL00046889 | chr9 | 5,843,131 | 5,843,225 | 94     | Loss |
| DEL00046891 | chr9 | 5,874,643 | 5,874,702 | 59     | Loss |
| DEL00046894 | chr9 | 5,944,552 | 5,944,849 | 297    | Loss |
| DEL00046897 | chr9 | 6,025,090 | 6,027,759 | 2,669  | Loss |
| DEL00046908 | chr9 | 6,305,467 | 6,306,550 | 1,083  | Loss |
| DEL00046910 | chr9 | 6,313,113 | 6,313,326 | 213    | Loss |
| DUP00046912 | chr9 | 6,362,103 | 6,376,341 | 14,238 | Gain |
| DEL00046913 | chr9 | 6,416,648 | 6,421,049 | 4,401  | Loss |
| DEL00046927 | chr9 | 6,566,849 | 6,569,936 | 3,087  | Loss |
| DEL00046948 | chr9 | 6,784,051 | 6,784,115 | 64     | Loss |
| DEL00046964 | chr9 | 7,052,712 | 7,053,126 | 414    | Loss |
| DEL00046969 | chr9 | 7,183,610 | 7,183,947 | 337    | Loss |
| DEL00046980 | chr9 | 7,446,895 | 7,447,091 | 196    | Loss |
| DEL00046988 | chr9 | 7,690,440 | 7,690,541 | 101    | Loss |
| DEL00046989 | chr9 | 7,725,800 | 7,726,348 | 548    | Loss |
| DEL00046991 | chr9 | 7,726,652 | 7,726,719 | 67     | Loss |
| DEL00046995 | chr9 | 7,783,106 | 7,783,162 | 56     | Loss |
| DEL00046999 | chr9 | 7,948,226 | 7,948,403 | 177    | Loss |
| DEL00047000 | chr9 | 7,957,697 | 7,957,879 | 182    | Loss |
| DEL00047004 | chr9 | 8,004,352 | 8,005,314 | 962    | Loss |
| DEL00047008 | chr9 | 8,113,225 | 8,113,430 | 205    | Loss |
| DEL00047009 | chr9 | 8,116,726 | 8,116,852 | 126    | Loss |
| DEL00047011 | chr9 | 8,175,610 | 8,179,350 | 3,740  | Loss |
| DEL00047014 | chr9 | 8,204,122 | 8,204,222 | 100    | Loss |
| DEL00047019 | chr9 | 8,297,405 | 8,297,458 | 53     | Loss |
| DEL00047028 | chr9 | 8,470,364 | 8,471,073 | 709    | Loss |
| DEL00047029 | chr9 | 8,489,686 | 8,489,826 | 140    | Loss |
| DEL00047035 | chr9 | 8,503,695 | 8,504,298 | 603    | Loss |
| DEL00047040 | chr9 | 8,560,548 | 8,565,795 | 5,247  | Loss |
| DEL00047047 | chr9 | 8,722,967 | 8,723,410 | 443    | Loss |

|             |      |            |            |       |      |
|-------------|------|------------|------------|-------|------|
| DEL00047063 | chr9 | 8,965,817  | 8,966,266  | 449   | Loss |
| DEL00047065 | chr9 | 8,982,897  | 8,983,468  | 571   | Loss |
| DEL00047067 | chr9 | 9,011,628  | 9,012,129  | 501   | Loss |
| DEL00047068 | chr9 | 9,032,889  | 9,033,405  | 516   | Loss |
| DEL00047072 | chr9 | 9,066,077  | 9,066,726  | 649   | Loss |
| DEL00047075 | chr9 | 9,126,471  | 9,126,540  | 69    | Loss |
| DEL00047085 | chr9 | 9,312,221  | 9,312,617  | 396   | Loss |
| DEL00047092 | chr9 | 9,480,584  | 9,488,624  | 8,040 | Loss |
| DEL00047093 | chr9 | 9,489,386  | 9,489,573  | 187   | Loss |
| DEL00047096 | chr9 | 9,509,011  | 9,509,241  | 230   | Loss |
| DEL00047098 | chr9 | 9,612,357  | 9,612,419  | 62    | Loss |
| DEL00047101 | chr9 | 9,692,829  | 9,693,133  | 304   | Loss |
| DEL00047108 | chr9 | 9,777,631  | 9,777,835  | 204   | Loss |
| DEL00047109 | chr9 | 9,785,690  | 9,786,423  | 733   | Loss |
| DEL00047110 | chr9 | 9,790,932  | 9,791,011  | 79    | Loss |
| DUP00047112 | chr9 | 9,827,658  | 9,828,514  | 856   | Gain |
| DEL00047116 | chr9 | 9,899,218  | 9,899,874  | 656   | Loss |
| DEL00047123 | chr9 | 10,161,404 | 10,161,498 | 94    | Loss |
| DEL00047126 | chr9 | 10,196,234 | 10,197,378 | 1,144 | Loss |
| DEL00047131 | chr9 | 10,240,497 | 10,240,763 | 266   | Loss |
| DEL00047150 | chr9 | 10,635,437 | 10,639,906 | 4,469 | Loss |
| DEL00047154 | chr9 | 10,800,229 | 10,800,291 | 62    | Loss |
| DEL00047157 | chr9 | 10,848,426 | 10,852,570 | 4,144 | Loss |
| DEL00047162 | chr9 | 10,925,735 | 10,925,972 | 237   | Loss |
| DEL00047189 | chr9 | 11,103,892 | 11,104,103 | 211   | Loss |
| DEL00047191 | chr9 | 11,118,990 | 11,119,047 | 57    | Loss |
| DEL00047197 | chr9 | 11,236,080 | 11,243,612 | 7,532 | Loss |
| DEL00047205 | chr9 | 11,397,402 | 11,404,890 | 7,488 | Loss |
| DEL00047210 | chr9 | 11,414,799 | 11,419,969 | 5,170 | Loss |
| DEL00047219 | chr9 | 11,683,266 | 11,683,579 | 313   | Loss |
| DEL00047225 | chr9 | 11,969,997 | 11,970,085 | 88    | Loss |
| DEL00047236 | chr9 | 12,239,528 | 12,239,661 | 133   | Loss |
| DEL00047237 | chr9 | 12,254,746 | 12,254,837 | 91    | Loss |
| DEL00047244 | chr9 | 12,374,310 | 12,374,610 | 300   | Loss |
| DEL00047249 | chr9 | 12,543,021 | 12,546,089 | 3,068 | Loss |
| DEL00047250 | chr9 | 12,587,997 | 12,592,343 | 4,346 | Loss |
| DEL00047271 | chr9 | 12,728,341 | 12,729,464 | 1,123 | Loss |
| DEL00047279 | chr9 | 12,729,605 | 12,730,024 | 419   | Loss |
| DEL00047286 | chr9 | 12,883,614 | 12,883,765 | 151   | Loss |
| DEL00047287 | chr9 | 12,895,080 | 12,895,238 | 158   | Loss |
| DEL00047288 | chr9 | 12,897,511 | 12,897,712 | 201   | Loss |
| DEL00047291 | chr9 | 12,950,327 | 12,950,672 | 345   | Loss |
| DEL00047296 | chr9 | 13,048,017 | 13,048,238 | 221   | Loss |
| DEL00047297 | chr9 | 13,075,598 | 13,075,825 | 227   | Loss |
| DEL00047299 | chr9 | 13,182,716 | 13,183,242 | 526   | Loss |
| DEL00047301 | chr9 | 13,233,428 | 13,233,741 | 313   | Loss |
| DEL00047310 | chr9 | 13,517,273 | 13,517,350 | 77    | Loss |
| DEL00047311 | chr9 | 13,527,368 | 13,527,433 | 65    | Loss |
| DEL00047312 | chr9 | 13,555,955 | 13,556,010 | 55    | Loss |

|             |      |            |            |       |      |
|-------------|------|------------|------------|-------|------|
| DEL00047327 | chr9 | 14,003,458 | 14,004,219 | 761   | Loss |
| DEL00047328 | chr9 | 14,046,026 | 14,046,278 | 252   | Loss |
| DEL00047335 | chr9 | 14,229,208 | 14,229,495 | 287   | Loss |
| DUP00047344 | chr9 | 14,531,920 | 14,533,226 | 1,306 | Gain |
| DEL00047349 | chr9 | 14,549,013 | 14,549,756 | 743   | Loss |
| DEL00047357 | chr9 | 14,550,335 | 14,551,044 | 709   | Loss |
| DEL00047366 | chr9 | 14,833,853 | 14,833,911 | 58    | Loss |
| DEL00047371 | chr9 | 14,946,792 | 14,946,897 | 105   | Loss |
| DEL00047374 | chr9 | 15,068,362 | 15,069,133 | 771   | Loss |
| DEL00047379 | chr9 | 15,340,765 | 15,340,881 | 116   | Loss |
| DEL00047380 | chr9 | 15,366,113 | 15,366,308 | 195   | Loss |
| DEL00047397 | chr9 | 15,807,267 | 15,807,703 | 436   | Loss |
| DEL00047400 | chr9 | 15,841,889 | 15,842,216 | 327   | Loss |
| DEL00047402 | chr9 | 15,885,186 | 15,885,254 | 68    | Loss |
| DEL00047406 | chr9 | 15,897,868 | 15,897,975 | 107   | Loss |
| DEL00047407 | chr9 | 15,909,737 | 15,910,193 | 456   | Loss |
| DEL00047413 | chr9 | 16,043,071 | 16,043,141 | 70    | Loss |
| DEL00047416 | chr9 | 16,161,674 | 16,161,851 | 177   | Loss |
| DUP00047417 | chr9 | 16,253,839 | 16,262,565 | 8,726 | Gain |
| DEL00047429 | chr9 | 16,610,495 | 16,611,545 | 1,050 | Loss |
| DEL00047431 | chr9 | 16,633,436 | 16,633,520 | 84    | Loss |
| DEL00047434 | chr9 | 16,691,249 | 16,691,321 | 72    | Loss |
| DEL00047435 | chr9 | 16,692,773 | 16,693,014 | 241   | Loss |
| DEL00047437 | chr9 | 16,746,816 | 16,746,918 | 102   | Loss |
| DEL00047440 | chr9 | 16,788,571 | 16,788,772 | 201   | Loss |
| DEL00047444 | chr9 | 16,868,452 | 16,868,609 | 157   | Loss |
| DEL00047447 | chr9 | 16,884,685 | 16,885,755 | 1,070 | Loss |
| DEL00047456 | chr9 | 17,016,113 | 17,016,183 | 70    | Loss |
| DEL00047461 | chr9 | 17,165,939 | 17,166,259 | 320   | Loss |
| DEL00047464 | chr9 | 17,482,785 | 17,482,836 | 51    | Loss |
| DEL00047471 | chr9 | 17,662,121 | 17,662,348 | 227   | Loss |
| DEL00047474 | chr9 | 17,701,303 | 17,701,726 | 423   | Loss |
| DEL00047476 | chr9 | 17,793,916 | 17,794,666 | 750   | Loss |
| DEL00047479 | chr9 | 17,836,996 | 17,837,318 | 322   | Loss |
| DEL00047480 | chr9 | 17,897,347 | 17,901,526 | 4,179 | Loss |
| DEL00047481 | chr9 | 17,935,405 | 17,935,456 | 51    | Loss |
| DEL00047483 | chr9 | 17,955,278 | 17,955,384 | 106   | Loss |
| DEL00047489 | chr9 | 18,035,364 | 18,035,557 | 193   | Loss |
| DEL00047498 | chr9 | 18,313,643 | 18,313,725 | 82    | Loss |
| DEL00047500 | chr9 | 18,351,891 | 18,352,034 | 143   | Loss |
| DEL00047502 | chr9 | 18,457,590 | 18,458,437 | 847   | Loss |
| DEL00047509 | chr9 | 18,639,136 | 18,639,431 | 295   | Loss |
| DEL00047521 | chr9 | 18,880,053 | 18,880,353 | 300   | Loss |
| DEL00047525 | chr9 | 19,062,505 | 19,062,642 | 137   | Loss |
| DEL00047531 | chr9 | 19,179,404 | 19,179,812 | 408   | Loss |
| DEL00047536 | chr9 | 19,390,114 | 19,390,174 | 60    | Loss |
| DEL00047537 | chr9 | 19,492,729 | 19,493,050 | 321   | Loss |
| DEL00047541 | chr9 | 19,569,379 | 19,569,441 | 62    | Loss |
| DEL00047545 | chr9 | 19,690,735 | 19,690,806 | 71    | Loss |

|             |       |            |            |        |       |
|-------------|-------|------------|------------|--------|-------|
| DEL00047546 | chr9  | 19,747,673 | 19,748,951 | 1,278  | Loss  |
| DEL00047551 | chr9  | 20,080,124 | 20,081,105 | 981    | Loss  |
| DEL00047556 | chr9  | 20,181,611 | 20,182,162 | 551    | Loss  |
| DEL00047562 | chr9  | 20,366,833 | 20,367,047 | 214    | Loss  |
| DEL00047571 | chr9  | 20,613,570 | 20,615,491 | 1,921  | Loss  |
| DEL00047594 | chr9  | 21,339,730 | 21,339,984 | 254    | Loss  |
| DEL00047596 | chr9  | 21,398,603 | 21,399,119 | 516    | Loss  |
| DEL00047597 | chr9  | 21,463,584 | 21,463,760 | 176    | Loss  |
| DEL00047605 | chr9  | 21,667,409 | 21,667,488 | 79     | Loss  |
| DEL00047613 | chr9  | 21,969,106 | 21,969,250 | 144    | Loss  |
| DEL00047615 | chr9  | 22,013,704 | 22,013,819 | 115    | Loss  |
| DEL00047620 | chr9  | 22,112,491 | 22,112,554 | 63     | Loss  |
| DEL00047624 | chr9  | 22,209,605 | 22,209,682 | 77     | Loss  |
| DEL00047639 | chr9  | 22,311,028 | 22,311,300 | 272    | Loss  |
| DEL00047658 | chr9  | 22,704,224 | 22,704,433 | 209    | Loss  |
| DEL00047664 | chr9  | 22,815,978 | 22,816,118 | 140    | Loss  |
| DEL00047665 | chr9  | 22,824,342 | 22,824,486 | 144    | Loss  |
| DEL00047666 | chr9  | 22,896,151 | 22,896,223 | 72     | Loss  |
| DEL00047670 | chr9  | 23,054,340 | 23,054,582 | 242    | Loss  |
| DEL00047671 | chr9  | 23,095,133 | 23,095,800 | 667    | Loss  |
| DEL00047692 | chr9  | 23,520,413 | 23,520,814 | 401    | Loss  |
| DUP00047695 | chr9  | 23,521,010 | 23,521,915 | 905    | Mixed |
| DEL00047709 | chr9  | 23,522,446 | 23,522,820 | 374    | Loss  |
| DEL00047861 | chr10 | 171,220    | 184,045    | 12,825 | Loss  |
| DUP00047980 | chr10 | 390,412    | 392,395    | 1,983  | Gain  |
| DEL00047984 | chr10 | 449,535    | 450,599    | 1,064  | Loss  |
| DEL00047985 | chr10 | 465,668    | 466,848    | 1,180  | Loss  |
| DEL00047999 | chr10 | 583,153    | 583,859    | 706    | Loss  |
| DEL00048021 | chr10 | 657,057    | 657,314    | 257    | Loss  |
| DEL00048022 | chr10 | 662,297    | 662,398    | 101    | Loss  |
| DEL00048025 | chr10 | 676,425    | 676,484    | 59     | Loss  |
| DEL00048030 | chr10 | 798,251    | 798,313    | 62     | Loss  |
| DEL00048036 | chr10 | 862,560    | 862,784    | 224    | Loss  |
| DEL00048038 | chr10 | 873,307    | 873,460    | 153    | Loss  |
| DEL00048039 | chr10 | 902,839    | 903,517    | 678    | Loss  |
| DEL00048057 | chr10 | 1,256,732  | 1,256,783  | 51     | Loss  |
| DEL00048067 | chr10 | 1,355,873  | 1,355,926  | 53     | Loss  |
| DEL00048068 | chr10 | 1,367,759  | 1,367,894  | 135    | Loss  |
| DEL00048069 | chr10 | 1,385,785  | 1,385,905  | 120    | Loss  |
| DEL00048072 | chr10 | 1,404,480  | 1,404,536  | 56     | Loss  |
| DEL00048087 | chr10 | 1,552,083  | 1,552,137  | 54     | Loss  |
| DEL00048101 | chr10 | 1,798,948  | 1,799,254  | 306    | Loss  |
| DEL00048108 | chr10 | 1,973,489  | 1,974,503  | 1,014  | Loss  |
| DEL00048121 | chr10 | 2,146,973  | 2,147,691  | 718    | Mixed |
| DEL00048142 | chr10 | 2,335,090  | 2,335,182  | 92     | Loss  |
| DUP00048145 | chr10 | 2,371,394  | 2,371,954  | 560    | Gain  |
| DEL00048161 | chr10 | 2,539,583  | 2,539,655  | 72     | Loss  |
| DEL00048178 | chr10 | 2,663,092  | 2,663,206  | 114    | Loss  |
| DEL00048179 | chr10 | 2,672,248  | 2,672,466  | 218    | Loss  |

|             |       |           |           |       |      |
|-------------|-------|-----------|-----------|-------|------|
| DEL00048180 | chr10 | 2,771,475 | 2,772,012 | 537   | Loss |
| DEL00048189 | chr10 | 2,848,460 | 2,848,518 | 58    | Loss |
| DEL00048190 | chr10 | 2,848,642 | 2,848,741 | 99    | Loss |
| DEL00048191 | chr10 | 2,883,802 | 2,884,057 | 255   | Loss |
| DEL00048193 | chr10 | 2,930,766 | 2,930,884 | 118   | Loss |
| DEL00048194 | chr10 | 2,960,196 | 2,960,310 | 114   | Loss |
| DEL00048200 | chr10 | 3,005,333 | 3,005,438 | 105   | Loss |
| DEL00048201 | chr10 | 3,006,768 | 3,007,284 | 516   | Loss |
| DEL00048204 | chr10 | 3,011,976 | 3,012,476 | 500   | Loss |
| DEL00048213 | chr10 | 3,055,792 | 3,055,880 | 88    | Loss |
| DEL00048217 | chr10 | 3,124,420 | 3,124,836 | 416   | Loss |
| DEL00048225 | chr10 | 3,201,601 | 3,201,715 | 114   | Loss |
| DEL00048233 | chr10 | 3,219,576 | 3,219,752 | 176   | Loss |
| DEL00048240 | chr10 | 3,322,291 | 3,322,469 | 178   | Loss |
| DEL00048243 | chr10 | 3,375,009 | 3,375,552 | 543   | Loss |
| DEL00048247 | chr10 | 3,413,934 | 3,414,770 | 836   | Loss |
| DEL00048249 | chr10 | 3,443,848 | 3,444,318 | 470   | Loss |
| DEL00048255 | chr10 | 3,573,554 | 3,573,814 | 260   | Loss |
| DEL00048259 | chr10 | 3,588,883 | 3,589,575 | 692   | Loss |
| DEL00048261 | chr10 | 3,616,556 | 3,616,664 | 108   | Loss |
| DEL00048262 | chr10 | 3,671,263 | 3,671,424 | 161   | Loss |
| DEL00048263 | chr10 | 3,675,778 | 3,676,038 | 260   | Loss |
| DEL00048269 | chr10 | 3,886,484 | 3,886,543 | 59    | Loss |
| DEL00048270 | chr10 | 3,905,266 | 3,905,319 | 53    | Loss |
| DEL00048272 | chr10 | 3,923,002 | 3,923,437 | 435   | Loss |
| DEL00048279 | chr10 | 4,014,763 | 4,014,833 | 70    | Loss |
| DEL00048281 | chr10 | 4,056,925 | 4,057,001 | 76    | Loss |
| DEL00048288 | chr10 | 4,167,964 | 4,170,013 | 2,049 | Loss |
| DEL00048301 | chr10 | 4,349,345 | 4,349,423 | 78    | Loss |
| DEL00048305 | chr10 | 4,365,039 | 4,365,224 | 185   | Loss |
| DEL00048320 | chr10 | 4,680,274 | 4,680,636 | 362   | Loss |
| DEL00048321 | chr10 | 4,733,597 | 4,734,090 | 493   | Loss |
| DEL00048323 | chr10 | 4,805,398 | 4,809,624 | 4,226 | Loss |
| DEL00048328 | chr10 | 4,880,229 | 4,880,345 | 116   | Loss |
| DEL00048339 | chr10 | 5,219,609 | 5,219,663 | 54    | Loss |
| DEL00048346 | chr10 | 5,275,277 | 5,276,375 | 1,098 | Loss |
| DEL00048348 | chr10 | 5,338,494 | 5,338,607 | 113   | Loss |
| DEL00048352 | chr10 | 5,465,406 | 5,465,556 | 150   | Loss |
| DEL00048353 | chr10 | 5,481,071 | 5,481,179 | 108   | Loss |
| DEL00048358 | chr10 | 5,673,514 | 5,674,276 | 762   | Loss |
| DEL00048362 | chr10 | 6,013,124 | 6,013,678 | 554   | Loss |
| DEL00048371 | chr10 | 6,103,012 | 6,103,103 | 91    | Loss |
| DEL00048372 | chr10 | 6,161,781 | 6,161,888 | 107   | Loss |
| DEL00048375 | chr10 | 6,201,727 | 6,201,795 | 68    | Loss |
| DEL00048379 | chr10 | 6,362,838 | 6,362,908 | 70    | Loss |
| DEL00048380 | chr10 | 6,366,664 | 6,367,302 | 638   | Loss |
| DEL00048383 | chr10 | 6,426,474 | 6,426,556 | 82    | Loss |
| DEL00048386 | chr10 | 6,436,630 | 6,436,787 | 157   | Loss |
| DEL00048387 | chr10 | 6,458,232 | 6,458,437 | 205   | Loss |

|             |       |            |            |       |      |
|-------------|-------|------------|------------|-------|------|
| DEL00048389 | chr10 | 6,476,715  | 6,476,986  | 271   | Loss |
| DEL00048395 | chr10 | 6,589,654  | 6,589,902  | 248   | Loss |
| DEL00048399 | chr10 | 6,687,762  | 6,687,899  | 137   | Loss |
| DEL00048401 | chr10 | 6,726,133  | 6,726,827  | 694   | Loss |
| DEL00048406 | chr10 | 6,823,397  | 6,823,928  | 531   | Loss |
| DEL00048409 | chr10 | 6,863,057  | 6,864,370  | 1,313 | Loss |
| DEL00048410 | chr10 | 6,876,109  | 6,877,962  | 1,853 | Loss |
| DEL00048412 | chr10 | 6,885,648  | 6,885,703  | 55    | Loss |
| DEL00048419 | chr10 | 6,977,238  | 6,977,417  | 179   | Loss |
| DEL00048420 | chr10 | 6,986,652  | 6,986,925  | 273   | Loss |
| DEL00048422 | chr10 | 7,085,279  | 7,085,343  | 64    | Loss |
| DEL00048426 | chr10 | 7,157,436  | 7,157,509  | 73    | Loss |
| DEL00048428 | chr10 | 7,178,384  | 7,178,830  | 446   | Loss |
| DEL00048432 | chr10 | 7,281,745  | 7,282,493  | 748   | Loss |
| DEL00048435 | chr10 | 7,304,753  | 7,304,812  | 59    | Loss |
| DEL00048442 | chr10 | 7,449,096  | 7,449,545  | 449   | Loss |
| DEL00048444 | chr10 | 7,507,439  | 7,509,249  | 1,810 | Loss |
| DEL00048446 | chr10 | 7,560,417  | 7,560,936  | 519   | Loss |
| DEL00048451 | chr10 | 7,621,454  | 7,621,569  | 115   | Loss |
| DEL00048453 | chr10 | 7,685,577  | 7,686,273  | 696   | Loss |
| DEL00048454 | chr10 | 7,722,019  | 7,722,108  | 89    | Loss |
| DEL00048455 | chr10 | 7,722,124  | 7,722,229  | 105   | Loss |
| DEL00048456 | chr10 | 7,755,531  | 7,755,637  | 106   | Loss |
| DEL00048465 | chr10 | 7,897,222  | 7,897,384  | 162   | Loss |
| DEL00048471 | chr10 | 8,122,832  | 8,123,349  | 517   | Loss |
| DEL00048485 | chr10 | 8,590,890  | 8,590,995  | 105   | Loss |
| DEL00048486 | chr10 | 8,592,824  | 8,592,930  | 106   | Loss |
| DEL00048489 | chr10 | 8,666,204  | 8,666,939  | 735   | Loss |
| DEL00048490 | chr10 | 8,669,210  | 8,669,392  | 182   | Loss |
| DEL00048507 | chr10 | 8,843,331  | 8,843,643  | 312   | Loss |
| DEL00048511 | chr10 | 8,933,210  | 8,933,270  | 60    | Loss |
| DEL00048515 | chr10 | 9,006,476  | 9,006,836  | 360   | Loss |
| DEL00048517 | chr10 | 9,048,161  | 9,048,694  | 533   | Loss |
| DEL00048522 | chr10 | 9,066,184  | 9,066,759  | 575   | Loss |
| DEL00048525 | chr10 | 9,214,994  | 9,215,179  | 185   | Loss |
| DEL00048527 | chr10 | 9,232,156  | 9,232,392  | 236   | Loss |
| DEL00048528 | chr10 | 9,246,629  | 9,246,691  | 62    | Loss |
| DEL00048530 | chr10 | 9,246,959  | 9,247,622  | 663   | Loss |
| DEL00048531 | chr10 | 9,254,493  | 9,254,643  | 150   | Loss |
| DEL00048539 | chr10 | 9,594,738  | 9,595,611  | 873   | Loss |
| DUP00048540 | chr10 | 9,630,563  | 9,630,647  | 84    | Gain |
| DEL00048543 | chr10 | 9,660,457  | 9,660,516  | 59    | Loss |
| DEL00048551 | chr10 | 9,946,374  | 9,946,747  | 373   | Loss |
| DEL00048555 | chr10 | 9,992,826  | 9,993,128  | 302   | Loss |
| DEL00048557 | chr10 | 10,017,923 | 10,018,314 | 391   | Loss |
| DEL00048561 | chr10 | 10,041,406 | 10,041,648 | 242   | Loss |
| DEL00048578 | chr10 | 10,285,696 | 10,285,787 | 91    | Loss |
| DEL00048582 | chr10 | 10,313,863 | 10,314,131 | 268   | Loss |
| DUP00048583 | chr10 | 10,383,912 | 10,387,923 | 4,011 | Gain |

|             |       |            |            |       |      |
|-------------|-------|------------|------------|-------|------|
| DEL00048598 | chr10 | 10,650,442 | 10,650,494 | 52    | Loss |
| DEL00048602 | chr10 | 10,688,498 | 10,689,010 | 512   | Loss |
| DEL00048607 | chr10 | 10,854,881 | 10,854,962 | 81    | Loss |
| DEL00048610 | chr10 | 10,874,103 | 10,874,159 | 56    | Loss |
| DEL00048615 | chr10 | 11,010,097 | 11,010,199 | 102   | Loss |
| DEL00048621 | chr10 | 11,134,958 | 11,136,105 | 1,147 | Loss |
| DEL00048628 | chr10 | 11,195,315 | 11,195,573 | 258   | Loss |
| DEL00048632 | chr10 | 11,264,299 | 11,264,931 | 632   | Loss |
| DEL00048639 | chr10 | 11,373,967 | 11,374,525 | 558   | Loss |
| DEL00048640 | chr10 | 11,422,926 | 11,423,034 | 108   | Loss |
| DEL00048642 | chr10 | 11,475,499 | 11,475,690 | 191   | Loss |
| DEL00048646 | chr10 | 11,621,759 | 11,621,857 | 98    | Loss |
| DEL00048648 | chr10 | 11,683,737 | 11,683,802 | 65    | Loss |
| DEL00048650 | chr10 | 11,759,143 | 11,759,499 | 356   | Loss |
| DEL00048651 | chr10 | 11,762,290 | 11,762,352 | 62    | Loss |
| DEL00048677 | chr10 | 12,346,194 | 12,346,367 | 173   | Loss |
| DEL00048707 | chr10 | 12,770,657 | 12,770,714 | 57    | Loss |
| DEL00048714 | chr10 | 13,134,381 | 13,143,666 | 9,285 | Loss |
| DEL00048716 | chr10 | 13,272,459 | 13,272,532 | 73    | Loss |
| DEL00048717 | chr10 | 13,280,898 | 13,281,448 | 550   | Loss |
| DEL00048723 | chr10 | 13,384,383 | 13,384,507 | 124   | Loss |
| DEL00048724 | chr10 | 13,537,601 | 13,541,154 | 3,553 | Loss |
| DEL00048725 | chr10 | 13,558,339 | 13,558,541 | 202   | Loss |
| DEL00048727 | chr10 | 13,615,808 | 13,618,768 | 2,960 | Loss |
| DEL00048733 | chr10 | 13,765,674 | 13,765,743 | 69    | Loss |
| DEL00048737 | chr10 | 13,920,825 | 13,920,896 | 71    | Loss |
| DEL00048743 | chr10 | 14,058,834 | 14,059,395 | 561   | Loss |
| DEL00048745 | chr10 | 14,068,496 | 14,068,678 | 182   | Loss |
| DEL00048746 | chr10 | 14,070,138 | 14,070,238 | 100   | Loss |
| DEL00048752 | chr10 | 14,200,972 | 14,201,181 | 209   | Loss |
| DEL00048754 | chr10 | 14,223,671 | 14,223,724 | 53    | Loss |
| DEL00048758 | chr10 | 14,364,124 | 14,364,191 | 67    | Loss |
| DEL00048762 | chr10 | 14,564,575 | 14,564,653 | 78    | Loss |
| DEL00048766 | chr10 | 14,598,276 | 14,598,678 | 402   | Loss |
| DEL00048768 | chr10 | 14,643,680 | 14,643,745 | 65    | Loss |
| DEL00048770 | chr10 | 14,753,237 | 14,753,342 | 105   | Loss |
| DEL00048776 | chr10 | 14,930,174 | 14,930,372 | 198   | Loss |
| DEL00048786 | chr10 | 15,384,373 | 15,384,430 | 57    | Loss |
| DEL00048791 | chr10 | 15,537,972 | 15,538,396 | 424   | Loss |
| DEL00048794 | chr10 | 15,665,511 | 15,665,628 | 117   | Loss |
| DEL00048797 | chr10 | 15,755,366 | 15,755,541 | 175   | Loss |
| DUP00048798 | chr10 | 15,780,898 | 15,781,019 | 121   | Gain |
| DEL00048801 | chr10 | 15,850,504 | 15,850,599 | 95    | Loss |
| DEL00048806 | chr10 | 16,067,159 | 16,067,346 | 187   | Loss |
| DEL00048809 | chr10 | 16,088,871 | 16,095,577 | 6,706 | Loss |
| DEL00048815 | chr10 | 16,216,684 | 16,216,804 | 120   | Loss |
| DEL00048830 | chr10 | 16,595,910 | 16,596,315 | 405   | Loss |
| DEL00048843 | chr10 | 16,712,869 | 16,712,979 | 110   | Loss |
| DEL00048847 | chr10 | 16,888,016 | 16,888,068 | 52    | Loss |

|             |       |            |            |        |       |
|-------------|-------|------------|------------|--------|-------|
| DEL00048857 | chr10 | 17,104,907 | 17,105,726 | 819    | Loss  |
| DEL00048862 | chr10 | 17,209,404 | 17,209,873 | 469    | Loss  |
| DEL00048871 | chr10 | 17,425,539 | 17,426,804 | 1,265  | Loss  |
| DEL00048873 | chr10 | 17,620,262 | 17,620,450 | 188    | Loss  |
| DEL00048881 | chr10 | 17,929,273 | 17,929,555 | 282    | Loss  |
| DEL00048891 | chr10 | 18,161,331 | 18,161,397 | 66     | Loss  |
| DEL00048893 | chr10 | 18,196,589 | 18,196,647 | 58     | Loss  |
| DUP00048895 | chr10 | 18,208,632 | 18,219,955 | 11,323 | Gain  |
| DEL00048898 | chr10 | 18,299,063 | 18,299,928 | 865    | Loss  |
| DEL00048899 | chr10 | 18,300,491 | 18,300,938 | 447    | Loss  |
| DEL00048900 | chr10 | 18,301,909 | 18,302,051 | 142    | Loss  |
| DEL00048901 | chr10 | 18,319,845 | 18,319,914 | 69     | Loss  |
| DEL00048902 | chr10 | 18,322,028 | 18,322,275 | 247    | Loss  |
| DEL00048911 | chr10 | 18,430,242 | 18,430,495 | 253    | Loss  |
| DEL00048912 | chr10 | 18,481,301 | 18,481,353 | 52     | Loss  |
| DEL00048921 | chr10 | 18,748,759 | 18,748,841 | 82     | Loss  |
| DEL00048923 | chr10 | 18,767,200 | 18,767,255 | 55     | Loss  |
| DEL00048924 | chr10 | 18,779,773 | 18,779,841 | 68     | Loss  |
| DEL00048926 | chr10 | 18,862,521 | 18,862,788 | 267    | Loss  |
| DEL00048928 | chr10 | 18,886,563 | 18,886,724 | 161    | Loss  |
| DEL00048930 | chr10 | 19,009,139 | 19,009,367 | 228    | Loss  |
| DEL00048943 | chr10 | 19,146,492 | 19,146,554 | 62     | Loss  |
| DEL00048944 | chr10 | 19,178,537 | 19,179,301 | 764    | Loss  |
| DEL00048948 | chr10 | 19,252,908 | 19,253,100 | 192    | Loss  |
| DEL00048956 | chr10 | 19,378,024 | 19,378,092 | 68     | Loss  |
| DEL00048960 | chr10 | 19,422,917 | 19,423,263 | 346    | Loss  |
| DEL00048963 | chr10 | 19,444,534 | 19,445,135 | 601    | Loss  |
| DEL00048966 | chr10 | 19,568,496 | 19,568,613 | 117    | Loss  |
| DEL00048968 | chr10 | 19,575,898 | 19,575,962 | 64     | Loss  |
| DUP00048977 | chr10 | 19,769,089 | 19,775,563 | 6,474  | Mixed |
| DEL00048980 | chr10 | 20,030,836 | 20,030,923 | 87     | Loss  |
| DEL00049032 | chr11 | 90,537     | 91,300     | 763    | Loss  |
| DEL00049034 | chr11 | 154,152    | 154,203    | 51     | Loss  |
| DEL00049042 | chr11 | 380,538    | 381,108    | 570    | Loss  |
| DEL00049053 | chr11 | 686,616    | 686,668    | 52     | Loss  |
| DEL00049062 | chr11 | 1,018,705  | 1,019,675  | 970    | Loss  |
| DEL00049064 | chr11 | 1,040,097  | 1,040,287  | 190    | Loss  |
| DEL00049067 | chr11 | 1,066,243  | 1,066,360  | 117    | Loss  |
| DEL00049070 | chr11 | 1,179,878  | 1,180,261  | 383    | Loss  |
| DEL00049071 | chr11 | 1,181,048  | 1,182,073  | 1,025  | Loss  |
| DEL00049072 | chr11 | 1,188,461  | 1,188,515  | 54     | Loss  |
| DEL00049092 | chr11 | 1,315,970  | 1,316,215  | 245    | Loss  |
| DUP00049104 | chr11 | 1,563,493  | 1,563,701  | 208    | Gain  |
| DUP00049107 | chr11 | 1,589,333  | 1,589,592  | 259    | Gain  |
| DEL00049116 | chr11 | 1,752,940  | 1,753,526  | 586    | Loss  |
| DEL00049121 | chr11 | 1,757,362  | 1,757,832  | 470    | Loss  |
| DEL00049125 | chr11 | 1,932,654  | 1,932,706  | 52     | Loss  |
| DEL00049130 | chr11 | 1,969,051  | 1,969,233  | 182    | Loss  |
| DEL00049132 | chr11 | 1,991,148  | 1,991,210  | 62     | Loss  |



|             |       |           |           |       |      |
|-------------|-------|-----------|-----------|-------|------|
| DEL00049141 | chr11 | 2,291,279 | 2,291,437 | 158   | Loss |
| DEL00049147 | chr11 | 2,319,810 | 2,320,075 | 265   | Loss |
| DUP00049148 | chr11 | 2,352,626 | 2,352,690 | 64    | Gain |
| DEL00049150 | chr11 | 2,391,165 | 2,391,218 | 53    | Loss |
| DEL00049155 | chr11 | 2,466,764 | 2,467,324 | 560   | Loss |
| DEL00049174 | chr11 | 3,491,156 | 3,491,792 | 636   | Loss |
| DEL00049175 | chr11 | 3,704,112 | 3,704,208 | 96    | Loss |
| DEL00049197 | chr11 | 4,577,158 | 4,577,219 | 61    | Loss |
| DEL00049199 | chr11 | 4,661,644 | 4,662,119 | 475   | Loss |
| DEL00049201 | chr11 | 4,696,398 | 4,696,458 | 60    | Loss |
| DEL00049203 | chr11 | 4,758,514 | 4,758,794 | 280   | Loss |
| DEL00049204 | chr11 | 4,776,377 | 4,776,690 | 313   | Loss |
| DEL00049215 | chr11 | 5,135,104 | 5,136,886 | 1,782 | Loss |
| DEL00049219 | chr11 | 5,254,292 | 5,254,384 | 92    | Loss |
| DEL00049229 | chr11 | 5,420,888 | 5,420,948 | 60    | Loss |
| DEL00049234 | chr11 | 5,504,688 | 5,505,130 | 442   | Loss |
| DEL00049262 | chr11 | 5,985,642 | 5,985,769 | 127   | Loss |
| DEL00049264 | chr11 | 6,003,298 | 6,003,355 | 57    | Loss |
| DEL00049265 | chr11 | 6,120,101 | 6,120,207 | 106   | Loss |
| DEL00049267 | chr11 | 6,143,321 | 6,143,389 | 68    | Loss |
| DEL00049269 | chr11 | 6,174,543 | 6,174,638 | 95    | Loss |
| DEL00049276 | chr11 | 6,229,281 | 6,229,487 | 206   | Loss |
| DEL00049278 | chr11 | 6,269,982 | 6,270,556 | 574   | Loss |
| DEL00049279 | chr11 | 6,271,235 | 6,271,780 | 545   | Loss |
| DEL00049282 | chr11 | 6,295,688 | 6,295,950 | 262   | Loss |
| DEL00049286 | chr11 | 6,366,010 | 6,366,095 | 85    | Loss |
| DEL00049290 | chr11 | 6,442,208 | 6,442,804 | 596   | Loss |
| DEL00049305 | chr11 | 6,790,159 | 6,790,474 | 315   | Loss |
| DEL00049315 | chr11 | 6,855,336 | 6,855,467 | 131   | Loss |
| DEL00049321 | chr11 | 6,967,388 | 6,967,592 | 204   | Loss |
| DEL00049322 | chr11 | 6,971,632 | 6,971,685 | 53    | Loss |
| DEL00049328 | chr11 | 7,034,547 | 7,034,602 | 55    | Loss |
| DEL00049333 | chr11 | 7,064,836 | 7,065,376 | 540   | Loss |
| DEL00049336 | chr11 | 7,102,311 | 7,102,509 | 198   | Loss |
| DEL00049341 | chr11 | 7,186,237 | 7,186,413 | 176   | Loss |
| DEL00049349 | chr11 | 7,413,334 | 7,413,387 | 53    | Loss |
| DEL00049350 | chr11 | 7,418,914 | 7,419,134 | 220   | Loss |
| DEL00049352 | chr11 | 7,428,225 | 7,428,317 | 92    | Loss |
| DEL00049353 | chr11 | 7,442,989 | 7,443,163 | 174   | Loss |
| DEL00049354 | chr11 | 7,471,395 | 7,471,465 | 70    | Loss |
| DEL00049355 | chr11 | 7,483,006 | 7,483,156 | 150   | Loss |
| DEL00049360 | chr11 | 7,593,783 | 7,593,861 | 78    | Loss |
| DEL00049368 | chr11 | 7,686,742 | 7,686,927 | 185   | Loss |
| DEL00049371 | chr11 | 7,742,642 | 7,742,696 | 54    | Loss |
| DEL00049372 | chr11 | 7,744,930 | 7,745,005 | 75    | Loss |
| DEL00049373 | chr11 | 7,750,822 | 7,751,058 | 236   | Loss |
| DEL00049377 | chr11 | 7,784,328 | 7,784,413 | 85    | Loss |
| DEL00049380 | chr11 | 7,830,907 | 7,830,966 | 59    | Loss |
| DEL00049384 | chr11 | 8,056,683 | 8,056,892 | 209   | Loss |

|             |       |            |            |       |      |
|-------------|-------|------------|------------|-------|------|
| DEL00049385 | chr11 | 8,104,115  | 8,104,201  | 86    | Loss |
| DEL00049393 | chr11 | 8,208,212  | 8,208,680  | 468   | Loss |
| DEL00049397 | chr11 | 8,272,676  | 8,272,741  | 65    | Loss |
| DEL00049403 | chr11 | 8,395,370  | 8,395,608  | 238   | Loss |
| DEL00049404 | chr11 | 8,485,934  | 8,486,509  | 575   | Loss |
| DEL00049405 | chr11 | 8,491,654  | 8,491,965  | 311   | Loss |
| DEL00049409 | chr11 | 8,535,286  | 8,536,859  | 1,573 | Loss |
| DEL00049420 | chr11 | 8,847,661  | 8,847,780  | 119   | Loss |
| DEL00049421 | chr11 | 8,849,745  | 8,849,899  | 154   | Loss |
| DEL00049425 | chr11 | 8,977,717  | 8,977,788  | 71    | Loss |
| DEL00049431 | chr11 | 9,001,528  | 9,001,631  | 103   | Loss |
| DUP00049439 | chr11 | 9,186,521  | 9,186,588  | 67    | Gain |
| DEL00049441 | chr11 | 9,258,119  | 9,258,824  | 705   | Loss |
| DEL00049442 | chr11 | 9,258,840  | 9,258,894  | 54    | Loss |
| DEL00049451 | chr11 | 9,412,988  | 9,413,613  | 625   | Loss |
| DEL00049453 | chr11 | 9,476,851  | 9,476,937  | 86    | Loss |
| DEL00049457 | chr11 | 9,515,750  | 9,515,853  | 103   | Loss |
| DEL00049458 | chr11 | 9,596,512  | 9,596,698  | 186   | Loss |
| DEL00049459 | chr11 | 9,610,810  | 9,611,139  | 329   | Loss |
| DEL00049461 | chr11 | 9,618,967  | 9,619,296  | 329   | Loss |
| DEL00049465 | chr11 | 9,700,575  | 9,701,142  | 567   | Loss |
| DEL00049477 | chr11 | 10,039,977 | 10,040,819 | 842   | Loss |
| DEL00049483 | chr11 | 10,220,180 | 10,220,534 | 354   | Loss |
| DEL00049484 | chr11 | 10,228,155 | 10,228,236 | 81    | Loss |
| DEL00049485 | chr11 | 10,281,237 | 10,281,312 | 75    | Loss |
| DEL00049491 | chr11 | 10,359,107 | 10,359,189 | 82    | Loss |
| DEL00049496 | chr11 | 10,419,992 | 10,420,623 | 631   | Loss |
| DEL00049498 | chr11 | 10,555,735 | 10,556,492 | 757   | Loss |
| DEL00049512 | chr11 | 10,878,595 | 10,878,706 | 111   | Loss |
| DEL00049513 | chr11 | 10,902,740 | 10,902,806 | 66    | Loss |
| DEL00049530 | chr11 | 10,956,397 | 10,957,500 | 1,103 | Loss |
| DEL00049533 | chr11 | 10,996,623 | 10,996,797 | 174   | Loss |
| DEL00049535 | chr11 | 11,007,256 | 11,007,325 | 69    | Loss |
| DEL00049545 | chr11 | 11,139,951 | 11,140,660 | 709   | Loss |
| DEL00049552 | chr11 | 11,331,363 | 11,331,473 | 110   | Loss |
| DEL00049554 | chr11 | 11,366,599 | 11,367,108 | 509   | Loss |
| DEL00049555 | chr11 | 11,369,579 | 11,369,650 | 71    | Loss |
| DEL00049556 | chr11 | 11,373,304 | 11,373,805 | 501   | Loss |
| DEL00049559 | chr11 | 11,443,370 | 11,443,440 | 70    | Loss |
| DEL00049560 | chr11 | 11,445,235 | 11,445,341 | 106   | Loss |
| DEL00049572 | chr11 | 11,674,278 | 11,674,495 | 217   | Loss |
| DEL00049586 | chr11 | 12,006,596 | 12,007,444 | 848   | Loss |
| DEL00049592 | chr11 | 12,071,527 | 12,071,823 | 296   | Loss |
| DEL00049597 | chr11 | 12,181,399 | 12,181,487 | 88    | Loss |
| DEL00049598 | chr11 | 12,202,692 | 12,208,285 | 5,593 | Loss |
| DEL00049599 | chr11 | 12,225,371 | 12,225,496 | 125   | Loss |
| DEL00049602 | chr11 | 12,242,691 | 12,242,823 | 132   | Loss |
| DEL00049609 | chr11 | 12,291,547 | 12,291,618 | 71    | Loss |
| DEL00049614 | chr11 | 12,320,064 | 12,320,358 | 294   | Loss |

|             |       |            |            |        |       |
|-------------|-------|------------|------------|--------|-------|
| DEL00049617 | chr11 | 12,352,984 | 12,353,045 | 61     | Loss  |
| DEL00049619 | chr11 | 12,395,896 | 12,397,489 | 1,593  | Loss  |
| DEL00049621 | chr11 | 12,494,656 | 12,494,784 | 128    | Loss  |
| DEL00049641 | chr11 | 12,873,653 | 12,873,772 | 119    | Loss  |
| DEL00049651 | chr11 | 13,113,956 | 13,114,951 | 995    | Loss  |
| DEL00049652 | chr11 | 13,155,525 | 13,156,386 | 861    | Loss  |
| DUP00049658 | chr11 | 13,320,649 | 13,320,744 | 95     | Gain  |
| DEL00049659 | chr11 | 13,324,159 | 13,324,379 | 220    | Loss  |
| DEL00049662 | chr11 | 13,351,741 | 13,366,217 | 14,476 | Loss  |
| DEL00049669 | chr11 | 13,547,056 | 13,547,175 | 119    | Loss  |
| DEL00049677 | chr11 | 13,770,359 | 13,770,418 | 59     | Loss  |
| DEL00049678 | chr11 | 13,774,034 | 13,774,195 | 161    | Loss  |
| DEL00049683 | chr11 | 13,820,409 | 13,820,633 | 224    | Loss  |
| DEL00049688 | chr11 | 13,990,489 | 13,990,917 | 428    | Loss  |
| DEL00049692 | chr11 | 14,145,584 | 14,145,784 | 200    | Loss  |
| DEL00049696 | chr11 | 14,208,911 | 14,209,759 | 848    | Loss  |
| DEL00049699 | chr11 | 14,244,168 | 14,244,958 | 790    | Loss  |
| DEL00049703 | chr11 | 14,439,693 | 14,439,850 | 157    | Loss  |
| DEL00049705 | chr11 | 14,548,774 | 14,549,196 | 422    | Loss  |
| DEL00049709 | chr11 | 14,568,967 | 14,569,123 | 156    | Loss  |
| DEL00049721 | chr11 | 14,832,253 | 14,832,387 | 134    | Loss  |
| DEL00049730 | chr11 | 15,182,230 | 15,182,340 | 110    | Loss  |
| DEL00049733 | chr11 | 15,263,296 | 15,263,377 | 81     | Loss  |
| DEL00049754 | chr11 | 16,036,643 | 16,036,736 | 93     | Loss  |
| DEL00049756 | chr11 | 16,129,789 | 16,130,268 | 479    | Loss  |
| DEL00049761 | chr11 | 16,235,401 | 16,235,662 | 261    | Loss  |
| DEL00049773 | chr11 | 16,464,272 | 16,464,397 | 125    | Loss  |
| DEL00049774 | chr11 | 16,533,252 | 16,533,458 | 206    | Loss  |
| DEL00049777 | chr11 | 16,584,281 | 16,584,336 | 55     | Loss  |
| DEL00049790 | chr11 | 16,758,129 | 16,758,207 | 78     | Loss  |
| DUP00049796 | chr11 | 16,947,245 | 16,963,739 | 16,494 | Gain  |
| DEL00049808 | chr11 | 17,236,173 | 17,236,315 | 142    | Loss  |
| DEL00049809 | chr11 | 17,237,318 | 17,237,693 | 375    | Loss  |
| DEL00049824 | chr11 | 17,475,857 | 17,476,038 | 181    | Loss  |
| DEL00049843 | chr11 | 17,804,454 | 17,804,506 | 52     | Loss  |
| DEL00049846 | chr11 | 17,857,107 | 17,857,206 | 99     | Loss  |
| DUP00049860 | chr11 | 18,160,400 | 18,160,695 | 295    | Gain  |
| DEL00049867 | chr11 | 18,198,600 | 18,199,088 | 488    | Mixed |
| DEL00049886 | chr11 | 18,608,539 | 18,608,724 | 185    | Loss  |
| DEL00049892 | chr11 | 18,863,491 | 18,863,636 | 145    | Loss  |
| DEL00049908 | chr11 | 19,670,672 | 19,671,708 | 1,036  | Loss  |
| DEL00049936 | chr12 | 320,033    | 320,097    | 64     | Loss  |
| DEL00049948 | chr12 | 340,399    | 341,259    | 860    | Loss  |
| DEL00049967 | chr12 | 458,762    | 463,827    | 5,065  | Loss  |
| DEL00049985 | chr12 | 714,456    | 714,716    | 260    | Loss  |
| DEL00049986 | chr12 | 719,252    | 719,654    | 402    | Loss  |
| DEL00049988 | chr12 | 740,361    | 741,677    | 1,316  | Loss  |
| DEL00049989 | chr12 | 745,502    | 745,557    | 55     | Loss  |
| DEL00049995 | chr12 | 798,868    | 802,305    | 3,437  | Loss  |

|             |       |           |           |        |      |
|-------------|-------|-----------|-----------|--------|------|
| DEL00049999 | chr12 | 869,978   | 870,275   | 297    | Loss |
| DEL00050005 | chr12 | 936,695   | 936,844   | 149    | Loss |
| DEL00050010 | chr12 | 995,844   | 995,989   | 145    | Loss |
| DEL00050016 | chr12 | 1,117,562 | 1,117,889 | 327    | Loss |
| DEL00050018 | chr12 | 1,171,849 | 1,172,032 | 183    | Loss |
| DEL00050020 | chr12 | 1,211,503 | 1,211,629 | 126    | Loss |
| DEL00050034 | chr12 | 1,276,483 | 1,276,889 | 406    | Loss |
| DEL00050076 | chr12 | 1,605,486 | 1,605,859 | 373    | Loss |
| DEL00050080 | chr12 | 1,608,332 | 1,608,402 | 70     | Loss |
| DEL00050082 | chr12 | 1,611,794 | 1,611,894 | 100    | Loss |
| DEL00050083 | chr12 | 1,635,220 | 1,635,274 | 54     | Loss |
| DEL00050087 | chr12 | 1,735,364 | 1,735,421 | 57     | Loss |
| DEL00050115 | chr12 | 1,878,177 | 1,878,273 | 96     | Loss |
| DEL00050129 | chr12 | 1,996,690 | 1,997,041 | 351    | Loss |
| DEL00050130 | chr12 | 2,031,767 | 2,032,407 | 640    | Loss |
| DEL00050142 | chr12 | 2,260,215 | 2,260,269 | 54     | Loss |
| DEL00050145 | chr12 | 2,279,902 | 2,280,100 | 198    | Loss |
| DUP00050152 | chr12 | 2,330,923 | 2,331,295 | 372    | Gain |
| DEL00050171 | chr12 | 2,400,274 | 2,400,358 | 84     | Loss |
| DEL00050174 | chr12 | 2,434,151 | 2,448,024 | 13,873 | Loss |
| DEL00050179 | chr12 | 2,452,554 | 2,452,684 | 130    | Loss |
| DEL00050184 | chr12 | 2,614,886 | 2,615,047 | 161    | Loss |
| DEL00050189 | chr12 | 2,641,182 | 2,641,781 | 599    | Loss |
| DEL00050191 | chr12 | 2,642,386 | 2,647,488 | 5,102  | Loss |
| DEL00050216 | chr12 | 2,758,921 | 2,759,022 | 101    | Loss |
| DEL00050231 | chr12 | 3,060,855 | 3,062,508 | 1,653  | Loss |
| DEL00050240 | chr12 | 3,241,723 | 3,242,229 | 506    | Loss |
| DEL00050242 | chr12 | 3,258,984 | 3,259,071 | 87     | Loss |
| DEL00050245 | chr12 | 3,280,487 | 3,281,513 | 1,026  | Loss |
| DEL00050249 | chr12 | 3,318,485 | 3,318,590 | 105    | Loss |
| DEL00050255 | chr12 | 3,352,239 | 3,361,730 | 9,491  | Loss |
| DEL00050270 | chr12 | 3,485,813 | 3,485,886 | 73     | Loss |
| DEL00050282 | chr12 | 3,743,558 | 3,743,619 | 61     | Loss |
| DEL00050292 | chr12 | 3,988,602 | 3,988,662 | 60     | Loss |
| DEL00050300 | chr12 | 4,110,282 | 4,110,508 | 226    | Loss |
| DEL00050304 | chr12 | 4,262,974 | 4,263,035 | 61     | Loss |
| DEL00050318 | chr12 | 4,432,734 | 4,432,812 | 78     | Loss |
| DUP00050321 | chr12 | 4,495,768 | 4,495,886 | 118    | Gain |
| DEL00050322 | chr12 | 4,541,147 | 4,541,331 | 184    | Loss |
| DEL00050324 | chr12 | 4,591,545 | 4,592,074 | 529    | Loss |
| DEL00050328 | chr12 | 4,631,978 | 4,632,096 | 118    | Loss |
| DEL00050329 | chr12 | 4,633,697 | 4,633,759 | 62     | Loss |
| DEL00050333 | chr12 | 4,672,770 | 4,673,491 | 721    | Loss |
| DEL00050334 | chr12 | 4,680,435 | 4,680,695 | 260    | Loss |
| DEL00050338 | chr12 | 4,703,144 | 4,704,643 | 1,499  | Loss |
| DEL00050345 | chr12 | 4,806,386 | 4,806,456 | 70     | Loss |
| DEL00050346 | chr12 | 4,822,183 | 4,824,098 | 1,915  | Loss |
| DEL00050349 | chr12 | 4,910,759 | 4,910,914 | 155    | Loss |
| DEL00050350 | chr12 | 4,925,769 | 4,925,824 | 55     | Loss |

|             |       |           |           |       |      |
|-------------|-------|-----------|-----------|-------|------|
| DEL00050351 | chr12 | 4,941,853 | 4,942,014 | 161   | Loss |
| DEL00050352 | chr12 | 4,999,917 | 5,000,008 | 91    | Loss |
| DEL00050356 | chr12 | 5,023,196 | 5,023,718 | 522   | Loss |
| DEL00050365 | chr12 | 5,169,716 | 5,169,781 | 65    | Loss |
| DEL00050370 | chr12 | 5,245,944 | 5,247,310 | 1,366 | Loss |
| DEL00050371 | chr12 | 5,257,847 | 5,258,110 | 263   | Loss |
| DEL00050375 | chr12 | 5,377,284 | 5,377,480 | 196   | Loss |
| DEL00050378 | chr12 | 5,386,347 | 5,386,641 | 294   | Loss |
| DEL00050388 | chr12 | 5,601,023 | 5,601,213 | 190   | Loss |
| DEL00050390 | chr12 | 5,607,115 | 5,607,289 | 174   | Loss |
| DUP00050392 | chr12 | 5,622,773 | 5,622,872 | 99    | Gain |
| DEL00050398 | chr12 | 5,715,540 | 5,715,716 | 176   | Loss |
| DEL00050402 | chr12 | 5,759,682 | 5,759,805 | 123   | Loss |
| DEL00050404 | chr12 | 5,761,670 | 5,762,178 | 508   | Loss |
| DEL00050405 | chr12 | 5,763,941 | 5,764,678 | 737   | Loss |
| DEL00050406 | chr12 | 5,794,556 | 5,796,022 | 1,466 | Loss |
| DEL00050411 | chr12 | 5,896,163 | 5,896,224 | 61    | Loss |
| DEL00050413 | chr12 | 6,000,910 | 6,001,179 | 269   | Loss |
| DEL00050415 | chr12 | 6,026,918 | 6,027,476 | 558   | Loss |
| DEL00050416 | chr12 | 6,036,258 | 6,036,455 | 197   | Loss |
| DEL00050421 | chr12 | 6,065,136 | 6,066,041 | 905   | Loss |
| DEL00050426 | chr12 | 6,146,868 | 6,147,929 | 1,061 | Loss |
| DEL00050427 | chr12 | 6,149,874 | 6,150,064 | 190   | Loss |
| DEL00050433 | chr12 | 6,251,531 | 6,251,811 | 280   | Loss |
| DEL00050434 | chr12 | 6,261,032 | 6,261,204 | 172   | Loss |
| DEL00050440 | chr12 | 6,368,981 | 6,369,036 | 55    | Loss |
| DEL00050446 | chr12 | 6,456,210 | 6,456,324 | 114   | Loss |
| DEL00050461 | chr12 | 6,692,361 | 6,692,526 | 165   | Loss |
| DEL00050462 | chr12 | 6,695,696 | 6,695,749 | 53    | Loss |
| DEL00050463 | chr12 | 6,706,226 | 6,706,282 | 56    | Loss |
| DEL00050465 | chr12 | 6,758,808 | 6,759,024 | 216   | Loss |
| DEL00050472 | chr12 | 6,817,167 | 6,817,480 | 313   | Loss |
| DEL00050487 | chr12 | 7,059,080 | 7,059,454 | 374   | Loss |
| DEL00050491 | chr12 | 7,234,889 | 7,234,954 | 65    | Loss |
| DEL00050493 | chr12 | 7,275,253 | 7,275,318 | 65    | Loss |
| DEL00050503 | chr12 | 7,392,383 | 7,392,669 | 286   | Loss |
| DEL00050504 | chr12 | 7,410,995 | 7,411,110 | 115   | Loss |
| DEL00050506 | chr12 | 7,478,380 | 7,478,505 | 125   | Loss |
| DEL00050508 | chr12 | 7,548,734 | 7,549,848 | 1,114 | Loss |
| DEL00050509 | chr12 | 7,592,139 | 7,592,241 | 102   | Loss |
| DEL00050512 | chr12 | 7,638,814 | 7,639,079 | 265   | Loss |
| DEL00050513 | chr12 | 7,654,111 | 7,654,292 | 181   | Loss |
| DEL00050524 | chr12 | 7,790,864 | 7,791,411 | 547   | Loss |
| DEL00050527 | chr12 | 7,831,912 | 7,833,429 | 1,517 | Loss |
| DEL00050531 | chr12 | 7,889,473 | 7,890,047 | 574   | Loss |
| DEL00050537 | chr12 | 7,964,632 | 7,964,800 | 168   | Loss |
| DEL00050539 | chr12 | 7,973,624 | 7,973,681 | 57    | Loss |
| DEL00050550 | chr12 | 8,064,557 | 8,064,948 | 391   | Loss |
| DEL00050561 | chr12 | 8,219,216 | 8,219,300 | 84    | Loss |

|             |       |            |            |        |      |
|-------------|-------|------------|------------|--------|------|
| DEL00050565 | chr12 | 8,269,220  | 8,269,346  | 126    | Loss |
| DEL00050567 | chr12 | 8,319,508  | 8,319,596  | 88     | Loss |
| DEL00050569 | chr12 | 8,378,962  | 8,379,266  | 304    | Loss |
| DEL00050570 | chr12 | 8,385,192  | 8,387,523  | 2,331  | Loss |
| DEL00050581 | chr12 | 8,534,702  | 8,535,361  | 659    | Loss |
| DEL00050582 | chr12 | 8,537,325  | 8,537,747  | 422    | Loss |
| DEL00050588 | chr12 | 8,596,074  | 8,596,157  | 83     | Loss |
| DEL00050589 | chr12 | 8,596,185  | 8,596,268  | 83     | Loss |
| DUP00050595 | chr12 | 8,721,149  | 8,721,214  | 65     | Gain |
| DEL00050598 | chr12 | 8,751,068  | 8,751,155  | 87     | Loss |
| DEL00050599 | chr12 | 8,759,551  | 8,759,753  | 202    | Loss |
| DEL00050608 | chr12 | 8,829,128  | 8,829,727  | 599    | Loss |
| DEL00050609 | chr12 | 8,836,109  | 8,836,182  | 73     | Loss |
| DEL00050610 | chr12 | 8,863,495  | 8,863,636  | 141    | Loss |
| DEL00050616 | chr12 | 8,897,352  | 8,897,749  | 397    | Loss |
| DEL00050619 | chr12 | 8,966,834  | 8,967,358  | 524    | Loss |
| DEL00050621 | chr12 | 8,991,713  | 8,992,090  | 377    | Loss |
| DEL00050623 | chr12 | 9,021,698  | 9,022,287  | 589    | Loss |
| DEL00050628 | chr12 | 9,068,417  | 9,068,482  | 65     | Loss |
| DEL00050637 | chr12 | 9,202,014  | 9,202,147  | 133    | Loss |
| DEL00050644 | chr12 | 9,260,108  | 9,260,183  | 75     | Loss |
| DEL00050649 | chr12 | 9,341,172  | 9,341,980  | 808    | Loss |
| DEL00050655 | chr12 | 9,395,204  | 9,395,265  | 61     | Loss |
| DEL00050662 | chr12 | 9,467,358  | 9,467,455  | 97     | Loss |
| DEL00050687 | chr12 | 10,283,312 | 10,283,373 | 61     | Loss |
| DEL00050688 | chr12 | 10,295,311 | 10,299,740 | 4,429  | Loss |
| DEL00050689 | chr12 | 10,300,844 | 10,302,270 | 1,426  | Loss |
| DEL00050692 | chr12 | 10,386,249 | 10,386,442 | 193    | Loss |
| DEL00050695 | chr12 | 10,522,252 | 10,522,311 | 59     | Loss |
| DEL00050699 | chr12 | 10,683,477 | 10,683,636 | 159    | Loss |
| DEL00050709 | chr12 | 10,959,025 | 10,959,304 | 279    | Loss |
| DEL00050715 | chr12 | 11,043,955 | 11,044,031 | 76     | Loss |
| DEL00050717 | chr12 | 11,109,208 | 11,109,714 | 506    | Loss |
| DEL00050724 | chr12 | 11,159,500 | 11,159,785 | 285    | Loss |
| DUP00050725 | chr12 | 11,179,851 | 11,199,013 | 19,162 | Gain |
| DEL00050736 | chr12 | 11,473,705 | 11,473,834 | 129    | Loss |
| DEL00050737 | chr12 | 11,492,216 | 11,492,351 | 135    | Loss |
| DEL00050738 | chr12 | 11,500,594 | 11,500,658 | 64     | Loss |
| DEL00050742 | chr12 | 11,617,359 | 11,617,452 | 93     | Loss |
| DEL00050746 | chr12 | 11,694,975 | 11,695,074 | 99     | Loss |
| DEL00050755 | chr12 | 11,769,365 | 11,769,509 | 144    | Loss |
| DEL00050764 | chr12 | 11,913,170 | 11,914,409 | 1,239  | Loss |
| DEL00050781 | chr12 | 12,230,562 | 12,230,970 | 408    | Loss |
| DEL00050804 | chr12 | 12,820,638 | 12,820,842 | 204    | Loss |
| DEL00050813 | chr12 | 13,009,144 | 13,009,955 | 811    | Loss |
| DEL00050816 | chr12 | 13,162,914 | 13,163,621 | 707    | Loss |
| DEL00050827 | chr12 | 13,286,728 | 13,286,779 | 51     | Loss |
| DEL00050829 | chr12 | 13,344,488 | 13,344,709 | 221    | Loss |
| DEL00050832 | chr12 | 13,357,586 | 13,357,656 | 70     | Loss |

|             |       |            |            |        |       |
|-------------|-------|------------|------------|--------|-------|
| DEL00050850 | chr12 | 14,039,748 | 14,040,217 | 469    | Loss  |
| DEL00050856 | chr12 | 14,086,762 | 14,086,962 | 200    | Loss  |
| DUP00050861 | chr12 | 14,208,529 | 14,208,618 | 89     | Gain  |
| DEL00050869 | chr12 | 14,530,853 | 14,530,913 | 60     | Loss  |
| DEL00050879 | chr12 | 14,651,240 | 14,651,757 | 517    | Loss  |
| DEL00050886 | chr12 | 14,975,427 | 14,975,479 | 52     | Loss  |
| DEL00050887 | chr12 | 15,006,635 | 15,006,938 | 303    | Loss  |
| DEL00050892 | chr12 | 15,341,470 | 15,341,847 | 377    | Loss  |
| DEL00050893 | chr12 | 15,367,772 | 15,368,059 | 287    | Loss  |
| DEL00050895 | chr12 | 15,375,459 | 15,376,418 | 959    | Loss  |
| DEL00050901 | chr12 | 15,474,560 | 15,474,619 | 59     | Loss  |
| DEL00050909 | chr12 | 15,717,466 | 15,717,596 | 130    | Loss  |
| DEL00050917 | chr12 | 16,034,496 | 16,034,982 | 486    | Loss  |
| DEL00050918 | chr12 | 16,053,161 | 16,053,222 | 61     | Loss  |
| DEL00050920 | chr12 | 16,219,149 | 16,219,217 | 68     | Loss  |
| DEL00050921 | chr12 | 16,234,643 | 16,234,836 | 193    | Loss  |
| DEL00050924 | chr12 | 16,391,537 | 16,391,860 | 323    | Loss  |
| DEL00050925 | chr12 | 16,427,051 | 16,427,110 | 59     | Loss  |
| DEL00050929 | chr12 | 16,524,156 | 16,524,231 | 75     | Loss  |
| DEL00050937 | chr12 | 16,797,610 | 16,797,832 | 222    | Loss  |
| DEL00050962 | chr12 | 17,537,696 | 17,537,792 | 96     | Loss  |
| DEL00050964 | chr12 | 17,834,101 | 17,834,648 | 547    | Loss  |
| DEL00050965 | chr12 | 17,886,180 | 17,886,336 | 156    | Loss  |
| DEL00050971 | chr12 | 18,029,613 | 18,034,402 | 4,789  | Loss  |
| DEL00050975 | chr12 | 18,128,042 | 18,128,109 | 67     | Loss  |
| DEL00050976 | chr12 | 18,193,414 | 18,193,472 | 58     | Loss  |
| DEL00050979 | chr12 | 18,300,166 | 18,300,229 | 63     | Loss  |
| DEL00050993 | chr12 | 18,509,718 | 18,509,878 | 160    | Loss  |
| DEL00050994 | chr12 | 18,620,827 | 18,620,878 | 51     | Loss  |
| DEL00051002 | chr12 | 18,713,554 | 18,713,615 | 61     | Loss  |
| DEL00051007 | chr12 | 18,910,556 | 18,910,608 | 52     | Loss  |
| DEL00051009 | chr12 | 19,019,225 | 19,019,286 | 61     | Loss  |
| DEL00051022 | chr12 | 19,606,624 | 19,606,676 | 52     | Loss  |
| DEL00051027 | chr12 | 19,622,708 | 19,622,801 | 93     | Loss  |
| DEL00051032 | chr12 | 19,777,009 | 19,777,166 | 157    | Loss  |
| DEL00051037 | chr12 | 19,797,212 | 19,797,382 | 170    | Loss  |
| DEL00051046 | chr12 | 20,016,535 | 20,016,708 | 173    | Loss  |
| DEL00051054 | chr12 | 20,415,612 | 20,416,616 | 1,004  | Mixed |
| DEL00051062 | chr12 | 20,416,620 | 20,417,487 | 867    | Loss  |
| DEL00051100 | chr13 | 689,714    | 689,896    | 182    | Loss  |
| DEL00051109 | chr13 | 1,111,394  | 1,111,616  | 222    | Loss  |
| DEL00051114 | chr13 | 1,204,097  | 1,204,323  | 226    | Loss  |
| DEL00051115 | chr13 | 1,205,305  | 1,206,091  | 786    | Loss  |
| DEL00051151 | chr13 | 1,430,895  | 1,476,315  | 45,420 | Loss  |
| DEL00051199 | chr13 | 1,516,490  | 1,529,200  | 12,710 | Loss  |
| DEL00051204 | chr13 | 1,639,932  | 1,640,070  | 138    | Loss  |
| DEL00051275 | chr13 | 1,691,576  | 1,742,334  | 50,758 | Loss  |
| DUP00051386 | chr13 | 1,774,485  | 1,795,729  | 21,244 | Gain  |
| DUP00051474 | chr13 | 1,886,204  | 1,932,302  | 46,098 | Gain  |

|             |       |           |           |        |      |
|-------------|-------|-----------|-----------|--------|------|
| DEL00051518 | chr13 | 1,950,796 | 1,976,916 | 26,120 | Loss |
| DEL00051556 | chr13 | 2,576,504 | 2,576,922 | 418    | Loss |
| DEL00051564 | chr13 | 2,826,260 | 2,827,789 | 1,529  | Loss |
| DEL00051575 | chr13 | 2,879,382 | 2,879,570 | 188    | Loss |
| DEL00051577 | chr13 | 2,915,797 | 2,915,871 | 74     | Loss |
| DEL00051581 | chr13 | 3,101,243 | 3,101,406 | 163    | Loss |
| DUP00051593 | chr13 | 3,178,389 | 3,178,466 | 77     | Gain |
| DEL00051599 | chr13 | 3,198,175 | 3,198,657 | 482    | Loss |
| DEL00051602 | chr13 | 3,232,571 | 3,232,780 | 209    | Loss |
| DEL00051606 | chr13 | 3,303,220 | 3,304,060 | 840    | Loss |
| DEL00051615 | chr13 | 3,396,354 | 3,396,801 | 447    | Loss |
| DEL00051619 | chr13 | 3,472,615 | 3,472,681 | 66     | Loss |
| DEL00051623 | chr13 | 3,514,130 | 3,514,379 | 249    | Loss |
| DEL00051625 | chr13 | 3,542,124 | 3,542,910 | 786    | Loss |
| DEL00051633 | chr13 | 3,601,138 | 3,602,042 | 904    | Loss |
| DEL00051644 | chr13 | 3,698,140 | 3,698,221 | 81     | Loss |
| DEL00051645 | chr13 | 3,701,951 | 3,702,080 | 129    | Loss |
| DEL00051649 | chr13 | 3,755,270 | 3,755,572 | 302    | Loss |
| DUP00051656 | chr13 | 3,844,893 | 3,849,975 | 5,082  | Gain |
| DEL00051658 | chr13 | 3,876,669 | 3,877,306 | 637    | Loss |
| DEL00051660 | chr13 | 3,895,656 | 3,895,790 | 134    | Loss |
| DEL00051661 | chr13 | 3,933,345 | 3,933,396 | 51     | Loss |
| DEL00051662 | chr13 | 3,978,004 | 3,978,732 | 728    | Loss |
| DEL00051671 | chr13 | 4,186,252 | 4,186,342 | 90     | Loss |
| DEL00051675 | chr13 | 4,230,979 | 4,231,242 | 263    | Loss |
| DEL00051685 | chr13 | 4,328,414 | 4,328,584 | 170    | Loss |
| DEL00051686 | chr13 | 4,341,610 | 4,341,768 | 158    | Loss |
| DEL00051688 | chr13 | 4,382,958 | 4,383,826 | 868    | Loss |
| DEL00051689 | chr13 | 4,386,351 | 4,386,954 | 603    | Loss |
| DEL00051699 | chr13 | 4,560,531 | 4,560,796 | 265    | Loss |
| DEL00051710 | chr13 | 4,715,437 | 4,715,651 | 214    | Loss |
| DEL00051712 | chr13 | 4,753,345 | 4,753,408 | 63     | Loss |
| DEL00051715 | chr13 | 4,900,419 | 4,901,079 | 660    | Loss |
| DEL00051722 | chr13 | 4,974,223 | 4,974,291 | 68     | Loss |
| DEL00051723 | chr13 | 5,043,978 | 5,044,035 | 57     | Loss |
| DEL00051727 | chr13 | 5,137,853 | 5,138,267 | 414    | Loss |
| DEL00051730 | chr13 | 5,184,888 | 5,185,311 | 423    | Loss |
| DEL00051735 | chr13 | 5,269,048 | 5,269,132 | 84     | Loss |
| DEL00051738 | chr13 | 5,300,146 | 5,301,191 | 1,045  | Loss |
| DEL00051739 | chr13 | 5,301,889 | 5,302,541 | 652    | Loss |
| DEL00051741 | chr13 | 5,363,158 | 5,363,716 | 558    | Loss |
| DEL00051745 | chr13 | 5,390,421 | 5,390,973 | 552    | Loss |
| DEL00051746 | chr13 | 5,393,556 | 5,393,622 | 66     | Loss |
| DEL00051749 | chr13 | 5,463,474 | 5,463,632 | 158    | Loss |
| DEL00051763 | chr13 | 5,576,872 | 5,576,951 | 79     | Loss |
| DEL00051766 | chr13 | 5,623,320 | 5,623,372 | 52     | Loss |
| DEL00051767 | chr13 | 5,653,685 | 5,653,742 | 57     | Loss |
| DEL00051768 | chr13 | 5,674,203 | 5,675,217 | 1,014  | Loss |
| DEL00051769 | chr13 | 5,681,022 | 5,681,092 | 70     | Loss |



|             |       |            |            |        |       |
|-------------|-------|------------|------------|--------|-------|
| DEL00051779 | chr13 | 5,837,658  | 5,837,710  | 52     | Loss  |
| DEL00051783 | chr13 | 5,924,248  | 5,925,095  | 847    | Loss  |
| DEL00051788 | chr13 | 5,977,018  | 5,977,209  | 191    | Loss  |
| DEL00051789 | chr13 | 5,996,398  | 5,996,519  | 121    | Loss  |
| DEL00051793 | chr13 | 6,066,848  | 6,066,923  | 75     | Loss  |
| DEL00051796 | chr13 | 6,093,677  | 6,093,735  | 58     | Loss  |
| DEL00051802 | chr13 | 6,141,987  | 6,142,248  | 261    | Loss  |
| DEL00051810 | chr13 | 6,295,249  | 6,295,326  | 77     | Loss  |
| DEL00051817 | chr13 | 6,325,105  | 6,325,231  | 126    | Loss  |
| DEL00051825 | chr13 | 6,389,347  | 6,389,653  | 306    | Loss  |
| DEL00051841 | chr13 | 6,614,459  | 6,614,520  | 61     | Loss  |
| DEL00051847 | chr13 | 6,735,115  | 6,735,218  | 103    | Loss  |
| DEL00051850 | chr13 | 6,812,850  | 6,812,929  | 79     | Loss  |
| DEL00051872 | chr13 | 7,189,687  | 7,189,757  | 70     | Loss  |
| DEL00051873 | chr13 | 7,192,549  | 7,192,860  | 311    | Loss  |
| DEL00051874 | chr13 | 7,202,577  | 7,202,740  | 163    | Loss  |
| DEL00051877 | chr13 | 7,239,653  | 7,239,730  | 77     | Loss  |
| DEL00051879 | chr13 | 7,242,003  | 7,242,087  | 84     | Loss  |
| DEL00051881 | chr13 | 7,272,717  | 7,274,737  | 2,020  | Loss  |
| DEL00051887 | chr13 | 7,302,771  | 7,302,832  | 61     | Loss  |
| DEL00051895 | chr13 | 7,323,541  | 7,324,314  | 773    | Loss  |
| DEL00051896 | chr13 | 7,338,122  | 7,338,210  | 88     | Loss  |
| DEL00051898 | chr13 | 7,384,967  | 7,385,077  | 110    | Loss  |
| DEL00051904 | chr13 | 7,441,174  | 7,441,251  | 77     | Loss  |
| DEL00051908 | chr13 | 7,487,202  | 7,497,476  | 10,274 | Loss  |
| DEL00051909 | chr13 | 7,538,517  | 7,538,674  | 157    | Loss  |
| DUP00051915 | chr13 | 7,632,702  | 7,633,128  | 426    | Mixed |
| DEL00051922 | chr13 | 7,731,971  | 7,733,335  | 1,364  | Loss  |
| DEL00051936 | chr13 | 7,894,722  | 7,894,983  | 261    | Loss  |
| DEL00051941 | chr13 | 8,017,498  | 8,017,641  | 143    | Loss  |
| DEL00051943 | chr13 | 8,049,661  | 8,050,387  | 726    | Loss  |
| DEL00051947 | chr13 | 8,145,928  | 8,146,391  | 463    | Loss  |
| DEL00051948 | chr13 | 8,239,300  | 8,239,419  | 119    | Loss  |
| DEL00051952 | chr13 | 8,300,075  | 8,300,285  | 210    | Loss  |
| DEL00051961 | chr13 | 8,430,201  | 8,430,261  | 60     | Loss  |
| DEL00051980 | chr13 | 8,749,748  | 8,750,210  | 462    | Loss  |
| DEL00051983 | chr13 | 8,762,180  | 8,762,242  | 62     | Loss  |
| DEL00051993 | chr13 | 9,010,196  | 9,010,257  | 61     | Loss  |
| DEL00052002 | chr13 | 9,111,264  | 9,111,668  | 404    | Loss  |
| DEL00052003 | chr13 | 9,114,095  | 9,114,194  | 99     | Loss  |
| DEL00052006 | chr13 | 9,347,787  | 9,347,885  | 98     | Loss  |
| DEL00052013 | chr13 | 9,633,559  | 9,634,335  | 776    | Loss  |
| DEL00052016 | chr13 | 9,669,648  | 9,669,923  | 275    | Loss  |
| DEL00052017 | chr13 | 9,675,294  | 9,675,501  | 207    | Loss  |
| DEL00052032 | chr13 | 10,090,025 | 10,090,076 | 51     | Loss  |
| DEL00052036 | chr13 | 10,251,499 | 10,251,616 | 117    | Loss  |
| DEL00052042 | chr13 | 10,316,609 | 10,317,717 | 1,108  | Loss  |
| DEL00052057 | chr13 | 10,688,497 | 10,688,552 | 55     | Loss  |
| DEL00052063 | chr13 | 10,771,126 | 10,771,488 | 362    | Loss  |

|             |       |            |            |        |      |
|-------------|-------|------------|------------|--------|------|
| DEL00052066 | chr13 | 10,947,376 | 10,947,689 | 313    | Loss |
| DEL00052069 | chr13 | 11,033,643 | 11,033,700 | 57     | Loss |
| DEL00052070 | chr13 | 11,056,217 | 11,056,407 | 190    | Loss |
| DEL00052071 | chr13 | 11,089,286 | 11,089,409 | 123    | Loss |
| DEL00052073 | chr13 | 11,230,662 | 11,230,731 | 69     | Loss |
| DEL00052082 | chr13 | 11,347,363 | 11,347,542 | 179    | Loss |
| DEL00052083 | chr13 | 11,366,651 | 11,366,793 | 142    | Loss |
| DEL00052084 | chr13 | 11,386,590 | 11,386,771 | 181    | Loss |
| DEL00052087 | chr13 | 11,466,690 | 11,467,439 | 749    | Loss |
| DEL00052095 | chr13 | 11,633,405 | 11,633,605 | 200    | Loss |
| DEL00052096 | chr13 | 11,658,190 | 11,658,368 | 178    | Loss |
| DEL00052098 | chr13 | 11,697,336 | 11,697,484 | 148    | Loss |
| DEL00052109 | chr13 | 11,821,960 | 11,822,041 | 81     | Loss |
| DEL00052113 | chr13 | 11,921,876 | 11,922,128 | 252    | Loss |
| DEL00052116 | chr13 | 11,951,115 | 11,951,168 | 53     | Loss |
| DEL00052117 | chr13 | 12,058,203 | 12,058,294 | 91     | Loss |
| DEL00052118 | chr13 | 12,074,441 | 12,074,909 | 468    | Loss |
| DEL00052119 | chr13 | 12,108,447 | 12,108,871 | 424    | Loss |
| DEL00052139 | chr13 | 12,785,443 | 12,786,062 | 619    | Loss |
| DEL00052158 | chr13 | 13,572,364 | 13,572,443 | 79     | Loss |
| DEL00052167 | chr13 | 13,816,923 | 13,817,464 | 541    | Loss |
| DEL00052170 | chr13 | 13,993,726 | 13,993,786 | 60     | Loss |
| DEL00052175 | chr13 | 14,084,749 | 14,086,195 | 1,446  | Loss |
| DEL00052177 | chr13 | 14,219,828 | 14,220,992 | 1,164  | Loss |
| DEL00052178 | chr13 | 14,251,639 | 14,252,199 | 560    | Loss |
| DEL00052184 | chr13 | 14,389,572 | 14,389,864 | 292    | Loss |
| DEL00052185 | chr13 | 14,392,735 | 14,393,480 | 745    | Loss |
| DEL00052188 | chr13 | 14,489,026 | 14,489,588 | 562    | Loss |
| DEL00052195 | chr13 | 14,653,557 | 14,653,750 | 193    | Loss |
| DUP00052204 | chr13 | 15,076,368 | 15,076,484 | 116    | Gain |
| DEL00052212 | chr13 | 15,297,874 | 15,298,438 | 564    | Loss |
| DEL00052235 | chr13 | 15,512,559 | 15,512,898 | 339    | Loss |
| DEL00052237 | chr13 | 15,524,225 | 15,541,909 | 17,684 | Loss |
| DEL00052243 | chr13 | 15,578,700 | 15,578,753 | 53     | Loss |
| DEL00052249 | chr13 | 15,687,068 | 15,687,136 | 68     | Loss |
| DEL00052251 | chr13 | 15,710,264 | 15,710,334 | 70     | Loss |
| DEL00052258 | chr13 | 15,842,429 | 15,842,771 | 342    | Loss |
| DEL00052260 | chr13 | 15,904,158 | 15,904,281 | 123    | Loss |
| DEL00052262 | chr13 | 15,930,602 | 15,930,824 | 222    | Loss |
| DEL00052267 | chr13 | 16,077,243 | 16,077,295 | 52     | Loss |
| DEL00052272 | chr13 | 16,155,418 | 16,155,666 | 248    | Loss |
| DEL00052285 | chr13 | 16,588,895 | 16,588,953 | 58     | Loss |
| DEL00052292 | chr13 | 16,738,105 | 16,739,672 | 1,567  | Loss |
| DEL00052298 | chr13 | 16,801,868 | 16,802,001 | 133    | Loss |
| DEL00052300 | chr13 | 16,824,207 | 16,824,296 | 89     | Loss |
| DEL00052315 | chr13 | 17,056,371 | 17,056,514 | 143    | Loss |
| DEL00052319 | chr13 | 17,131,119 | 17,131,521 | 402    | Loss |
| DEL00052321 | chr13 | 17,188,964 | 17,189,029 | 65     | Loss |
| DEL00052323 | chr13 | 17,228,861 | 17,228,996 | 135    | Loss |

|             |       |            |            |        |      |
|-------------|-------|------------|------------|--------|------|
| DEL00052326 | chr13 | 17,415,668 | 17,415,725 | 57     | Loss |
| DUP00052334 | chr13 | 17,572,747 | 17,572,805 | 58     | Gain |
| DEL00052337 | chr13 | 17,718,378 | 17,719,711 | 1,333  | Loss |
| DEL00052348 | chr13 | 17,939,202 | 17,939,657 | 455    | Loss |
| DEL00052391 | chr14 | 27,449     | 29,030     | 1,581  | Loss |
| DUP00052398 | chr14 | 29,162     | 30,004     | 842    | Gain |
| DEL00052411 | chr14 | 259,247    | 259,739    | 492    | Loss |
| DEL00052412 | chr14 | 286,318    | 286,583    | 265    | Loss |
| DEL00052413 | chr14 | 330,217    | 330,865    | 648    | Loss |
| DEL00052427 | chr14 | 769,261    | 769,936    | 675    | Loss |
| DEL00052431 | chr14 | 828,689    | 828,784    | 95     | Loss |
| DEL00052433 | chr14 | 890,232    | 890,346    | 114    | Loss |
| DEL00052436 | chr14 | 938,697    | 938,760    | 63     | Loss |
| DEL00052440 | chr14 | 999,912    | 1,000,012  | 100    | Loss |
| DEL00052442 | chr14 | 1,065,566  | 1,065,859  | 293    | Loss |
| DEL00052450 | chr14 | 1,363,164  | 1,363,240  | 76     | Loss |
| DEL00052451 | chr14 | 1,385,892  | 1,386,023  | 131    | Loss |
| DEL00052457 | chr14 | 1,396,785  | 1,397,091  | 306    | Loss |
| DUP00052461 | chr14 | 1,484,186  | 1,484,249  | 63     | Gain |
| DEL00052463 | chr14 | 1,540,452  | 1,541,034  | 582    | Loss |
| DEL00052465 | chr14 | 1,573,984  | 1,574,532  | 548    | Loss |
| DEL00052472 | chr14 | 1,707,039  | 1,707,122  | 83     | Loss |
| DEL00052478 | chr14 | 1,864,786  | 1,865,949  | 1,163  | Loss |
| DEL00052480 | chr14 | 2,128,082  | 2,128,144  | 62     | Loss |
| DEL00052489 | chr14 | 2,303,562  | 2,303,922  | 360    | Loss |
| DEL00052508 | chr14 | 2,684,669  | 2,684,921  | 252    | Loss |
| DEL00052510 | chr14 | 2,754,031  | 2,772,906  | 18,875 | Loss |
| DEL00052512 | chr14 | 2,779,182  | 2,781,840  | 2,658  | Loss |
| DEL00052513 | chr14 | 2,861,157  | 2,861,209  | 52     | Loss |
| DEL00052515 | chr14 | 2,897,281  | 2,897,335  | 54     | Loss |
| DEL00052522 | chr14 | 3,051,649  | 3,052,190  | 541    | Loss |
| DEL00052524 | chr14 | 3,083,679  | 3,083,807  | 128    | Loss |
| DEL00052527 | chr14 | 3,269,430  | 3,269,507  | 77     | Loss |
| DEL00052543 | chr14 | 3,479,452  | 3,481,434  | 1,982  | Loss |
| DEL00052545 | chr14 | 3,549,095  | 3,549,412  | 317    | Loss |
| DEL00052546 | chr14 | 3,573,092  | 3,573,368  | 276    | Loss |
| DEL00052564 | chr14 | 3,947,900  | 3,948,012  | 112    | Loss |
| DEL00052567 | chr14 | 4,151,735  | 4,151,929  | 194    | Loss |
| DEL00052572 | chr14 | 4,177,486  | 4,177,558  | 72     | Loss |
| DEL00052573 | chr14 | 4,233,044  | 4,233,607  | 563    | Loss |
| DEL00052576 | chr14 | 4,289,006  | 4,289,249  | 243    | Loss |
| DEL00052579 | chr14 | 4,327,771  | 4,327,834  | 63     | Loss |
| DEL00052589 | chr14 | 4,624,521  | 4,624,585  | 64     | Loss |
| DEL00052601 | chr14 | 5,118,722  | 5,118,857  | 135    | Loss |
| DEL00052605 | chr14 | 5,205,414  | 5,205,734  | 320    | Loss |
| DEL00052607 | chr14 | 5,267,053  | 5,267,584  | 531    | Loss |
| DEL00052609 | chr14 | 5,318,399  | 5,318,829  | 430    | Loss |
| DEL00052618 | chr14 | 5,536,413  | 5,536,468  | 55     | Loss |
| DEL00052620 | chr14 | 5,548,080  | 5,548,667  | 587    | Loss |

|             |       |            |            |       |       |
|-------------|-------|------------|------------|-------|-------|
| DEL00052630 | chr14 | 6,070,337  | 6,070,601  | 264   | Loss  |
| DEL00052637 | chr14 | 6,237,237  | 6,237,304  | 67    | Loss  |
| DEL00052683 | chr14 | 6,547,232  | 6,549,066  | 1,834 | Mixed |
| DEL00052717 | chr14 | 6,549,634  | 6,550,885  | 1,251 | Mixed |
| DEL00052729 | chr14 | 6,613,002  | 6,613,075  | 73    | Loss  |
| DEL00052730 | chr14 | 6,616,786  | 6,616,935  | 149   | Loss  |
| DEL00052731 | chr14 | 6,723,564  | 6,723,626  | 62    | Loss  |
| DEL00052752 | chr14 | 7,205,422  | 7,205,528  | 106   | Loss  |
| DEL00052756 | chr14 | 7,289,393  | 7,289,450  | 57    | Loss  |
| DEL00052757 | chr14 | 7,335,202  | 7,335,257  | 55    | Loss  |
| DEL00052765 | chr14 | 7,471,201  | 7,471,322  | 121   | Loss  |
| DUP00052774 | chr14 | 7,484,951  | 7,486,139  | 1,188 | Gain  |
| DEL00052788 | chr14 | 7,543,808  | 7,544,426  | 618   | Loss  |
| DEL00052798 | chr14 | 7,913,386  | 7,914,498  | 1,112 | Loss  |
| DEL00052801 | chr14 | 8,064,240  | 8,064,429  | 189   | Loss  |
| DEL00052807 | chr14 | 8,153,391  | 8,153,703  | 312   | Loss  |
| DEL00052809 | chr14 | 8,179,456  | 8,179,926  | 470   | Loss  |
| DEL00052816 | chr14 | 8,287,652  | 8,287,714  | 62    | Loss  |
| DEL00052819 | chr14 | 8,390,314  | 8,390,575  | 261   | Loss  |
| DEL00052824 | chr14 | 8,504,771  | 8,505,004  | 233   | Loss  |
| DEL00052829 | chr14 | 8,585,050  | 8,585,692  | 642   | Loss  |
| DEL00052830 | chr14 | 8,645,664  | 8,645,776  | 112   | Loss  |
| DEL00052836 | chr14 | 8,753,699  | 8,753,762  | 63    | Loss  |
| DEL00052844 | chr14 | 8,867,549  | 8,868,532  | 983   | Loss  |
| DEL00052846 | chr14 | 8,971,912  | 8,971,965  | 53    | Loss  |
| DEL00052848 | chr14 | 8,991,581  | 8,991,901  | 320   | Loss  |
| DEL00052850 | chr14 | 9,012,420  | 9,012,509  | 89    | Loss  |
| DEL00052855 | chr14 | 9,083,563  | 9,085,655  | 2,092 | Loss  |
| DEL00052856 | chr14 | 9,113,724  | 9,113,786  | 62    | Loss  |
| DEL00052858 | chr14 | 9,132,628  | 9,132,866  | 238   | Loss  |
| DEL00052860 | chr14 | 9,148,746  | 9,148,970  | 224   | Loss  |
| DEL00052861 | chr14 | 9,158,481  | 9,159,328  | 847   | Loss  |
| DEL00052862 | chr14 | 9,169,160  | 9,169,591  | 431   | Loss  |
| DEL00052864 | chr14 | 9,222,307  | 9,222,377  | 70    | Loss  |
| DEL00052870 | chr14 | 9,484,432  | 9,484,916  | 484   | Loss  |
| DEL00052871 | chr14 | 9,485,969  | 9,486,424  | 455   | Loss  |
| DEL00052873 | chr14 | 9,496,807  | 9,496,879  | 72    | Loss  |
| DEL00052877 | chr14 | 9,615,735  | 9,616,109  | 374   | Loss  |
| DEL00052880 | chr14 | 9,649,221  | 9,649,279  | 58    | Loss  |
| DEL00052882 | chr14 | 9,674,473  | 9,674,539  | 66    | Loss  |
| DEL00052883 | chr14 | 9,693,267  | 9,693,346  | 79    | Loss  |
| DEL00052887 | chr14 | 9,902,940  | 9,903,506  | 566   | Loss  |
| DEL00052896 | chr14 | 10,201,034 | 10,201,277 | 243   | Loss  |
| DEL00052901 | chr14 | 10,472,452 | 10,472,503 | 51    | Loss  |
| DEL00052909 | chr14 | 10,608,120 | 10,608,284 | 164   | Loss  |
| DEL00052917 | chr14 | 10,771,683 | 10,771,755 | 72    | Loss  |
| DEL00052920 | chr14 | 10,801,899 | 10,805,696 | 3,797 | Loss  |
| DEL00052921 | chr14 | 10,850,891 | 10,850,955 | 64    | Loss  |
| DEL00052922 | chr14 | 10,887,603 | 10,887,654 | 51    | Loss  |

|             |       |            |            |        |       |
|-------------|-------|------------|------------|--------|-------|
| DEL00052935 | chr14 | 11,103,211 | 11,104,046 | 835    | Loss  |
| DEL00052939 | chr14 | 11,176,457 | 11,176,522 | 65     | Loss  |
| DEL00052946 | chr14 | 11,399,399 | 11,399,577 | 178    | Loss  |
| DEL00052949 | chr14 | 11,417,570 | 11,417,676 | 106    | Loss  |
| DEL00052951 | chr14 | 11,511,447 | 11,511,740 | 293    | Loss  |
| DEL00052956 | chr14 | 11,600,323 | 11,600,847 | 524    | Loss  |
| DEL00052957 | chr14 | 11,613,323 | 11,613,504 | 181    | Loss  |
| DEL00052964 | chr14 | 11,703,141 | 11,703,309 | 168    | Loss  |
| DEL00052969 | chr14 | 11,872,553 | 11,872,624 | 71     | Loss  |
| DEL00052980 | chr14 | 12,116,380 | 12,116,441 | 61     | Loss  |
| DEL00052990 | chr14 | 12,299,829 | 12,299,881 | 52     | Loss  |
| DEL00052996 | chr14 | 12,404,037 | 12,404,096 | 59     | Loss  |
| DEL00053002 | chr14 | 12,481,353 | 12,481,470 | 117    | Loss  |
| DUP00053018 | chr14 | 13,000,074 | 13,000,417 | 343    | Gain  |
| DEL00053028 | chr14 | 13,152,804 | 13,152,963 | 159    | Loss  |
| DEL00053032 | chr14 | 13,251,287 | 13,251,553 | 266    | Loss  |
| DUP00053036 | chr14 | 13,252,441 | 13,252,682 | 241    | Gain  |
| DEL00053069 | chr14 | 13,787,227 | 13,787,278 | 51     | Loss  |
| DEL00053070 | chr14 | 13,811,018 | 13,812,167 | 1,149  | Loss  |
| DEL00053076 | chr14 | 13,834,553 | 13,834,861 | 308    | Loss  |
| DEL00053080 | chr14 | 13,845,386 | 13,845,456 | 70     | Loss  |
| DEL00053081 | chr14 | 13,853,475 | 13,853,612 | 137    | Loss  |
| DEL00053083 | chr14 | 13,856,341 | 13,858,213 | 1,872  | Loss  |
| DEL00053091 | chr14 | 13,930,894 | 13,931,091 | 197    | Loss  |
| DEL00053093 | chr14 | 13,964,377 | 13,964,640 | 263    | Loss  |
| DEL00053095 | chr14 | 14,030,926 | 14,031,015 | 89     | Loss  |
| DEL00053097 | chr14 | 14,036,047 | 14,036,597 | 550    | Loss  |
| DEL00053103 | chr14 | 14,056,319 | 14,056,518 | 199    | Loss  |
| DEL00053112 | chr14 | 14,125,776 | 14,125,835 | 59     | Loss  |
| DEL00053121 | chr14 | 14,257,186 | 14,257,237 | 51     | Loss  |
| DEL00053127 | chr14 | 14,349,330 | 14,349,561 | 231    | Loss  |
| DEL00053135 | chr14 | 14,381,510 | 14,382,089 | 579    | Loss  |
| DEL00053142 | chr14 | 14,452,312 | 14,454,559 | 2,247  | Loss  |
| DEL00053149 | chr14 | 14,518,900 | 14,519,434 | 534    | Loss  |
| DEL00053155 | chr14 | 14,602,570 | 14,602,949 | 379    | Loss  |
| DEL00053174 | chr14 | 14,791,478 | 14,792,077 | 599    | Loss  |
| DEL00053176 | chr14 | 14,798,947 | 14,799,591 | 644    | Loss  |
| DEL00053178 | chr14 | 14,813,509 | 14,819,342 | 5,833  | Loss  |
| DUP00053191 | chr14 | 14,959,845 | 14,959,951 | 106    | Gain  |
| DEL00053204 | chr14 | 15,202,057 | 15,202,977 | 920    | Loss  |
| DUP00053208 | chr14 | 15,327,004 | 15,337,672 | 10,668 | Mixed |
| DEL00053321 | chr15 | 21,320     | 21,379     | 59     | Loss  |
| DEL00053325 | chr15 | 22,342     | 22,454     | 112    | Loss  |
| DEL00053328 | chr15 | 22,767     | 23,021     | 254    | Loss  |
| DUP00053339 | chr15 | 24,041     | 29,517     | 5,476  | Mixed |
| DEL00053383 | chr15 | 356,243    | 356,763    | 520    | Loss  |
| DUP00053386 | chr15 | 472,242    | 472,311    | 69     | Gain  |
| DEL00053391 | chr15 | 578,338    | 578,465    | 127    | Loss  |
| DEL00053398 | chr15 | 960,266    | 960,354    | 88     | Loss  |

|             |       |           |           |        |      |
|-------------|-------|-----------|-----------|--------|------|
| DEL00053408 | chr15 | 1,088,143 | 1,091,385 | 3,242  | Loss |
| DEL00053412 | chr15 | 1,163,234 | 1,163,968 | 734    | Loss |
| DEL00053413 | chr15 | 1,197,430 | 1,197,562 | 132    | Loss |
| DEL00053415 | chr15 | 1,275,534 | 1,277,250 | 1,716  | Loss |
| DEL00053419 | chr15 | 1,434,235 | 1,434,295 | 60     | Loss |
| DEL00053423 | chr15 | 1,808,126 | 1,808,294 | 168    | Loss |
| DEL00053427 | chr15 | 1,921,231 | 1,921,301 | 70     | Loss |
| DEL00053428 | chr15 | 1,963,735 | 1,963,813 | 78     | Loss |
| DEL00053438 | chr15 | 2,167,620 | 2,168,208 | 588    | Loss |
| DEL00053441 | chr15 | 2,234,303 | 2,234,846 | 543    | Loss |
| DEL00053448 | chr15 | 2,410,095 | 2,410,581 | 486    | Loss |
| DUP00053450 | chr15 | 2,527,749 | 2,542,138 | 14,389 | Gain |
| DEL00053471 | chr15 | 2,824,937 | 2,825,145 | 208    | Loss |
| DEL00053476 | chr15 | 2,994,264 | 2,994,864 | 600    | Loss |
| DEL00053478 | chr15 | 3,046,824 | 3,047,827 | 1,003  | Loss |
| DEL00053479 | chr15 | 3,072,706 | 3,075,367 | 2,661  | Loss |
| DEL00053482 | chr15 | 3,308,022 | 3,308,186 | 164    | Loss |
| DEL00053487 | chr15 | 3,535,337 | 3,535,503 | 166    | Loss |
| DUP00053503 | chr15 | 3,780,702 | 3,780,830 | 128    | Gain |
| DEL00053509 | chr15 | 4,086,380 | 4,086,495 | 115    | Loss |
| DEL00053517 | chr15 | 4,510,722 | 4,510,799 | 77     | Loss |
| DEL00053541 | chr15 | 4,860,797 | 4,862,676 | 1,879  | Loss |
| DEL00053556 | chr15 | 4,975,558 | 4,976,145 | 587    | Loss |
| DEL00053558 | chr15 | 5,036,609 | 5,037,061 | 452    | Loss |
| DEL00053565 | chr15 | 5,328,105 | 5,328,271 | 166    | Loss |
| DEL00053566 | chr15 | 5,404,693 | 5,404,839 | 146    | Loss |
| DEL00053613 | chr15 | 6,457,480 | 6,457,531 | 51     | Loss |
| DEL00053619 | chr15 | 6,543,343 | 6,544,265 | 922    | Loss |
| DEL00053621 | chr15 | 6,740,461 | 6,740,528 | 67     | Loss |
| DUP00053652 | chr15 | 7,337,809 | 7,348,648 | 10,839 | Gain |
| DEL00053663 | chr15 | 7,442,800 | 7,442,853 | 53     | Loss |
| DEL00053670 | chr15 | 7,555,262 | 7,555,332 | 70     | Loss |
| DEL00053671 | chr15 | 7,572,956 | 7,573,177 | 221    | Loss |
| DEL00053677 | chr15 | 7,654,915 | 7,655,125 | 210    | Loss |
| DEL00053678 | chr15 | 7,665,544 | 7,665,723 | 179    | Loss |
| DEL00053688 | chr15 | 7,719,980 | 7,720,197 | 217    | Loss |
| DEL00053689 | chr15 | 7,722,937 | 7,723,035 | 98     | Loss |
| DEL00053728 | chr15 | 8,033,941 | 8,034,040 | 99     | Loss |
| DEL00053732 | chr15 | 8,182,166 | 8,182,262 | 96     | Loss |
| DEL00053738 | chr15 | 8,591,533 | 8,591,620 | 87     | Loss |
| DEL00053750 | chr15 | 8,727,897 | 8,727,965 | 68     | Loss |
| DEL00053754 | chr15 | 8,807,730 | 8,807,902 | 172    | Loss |
| DEL00053755 | chr15 | 8,821,500 | 8,822,280 | 780    | Loss |
| DEL00053769 | chr15 | 9,074,889 | 9,075,308 | 419    | Loss |
| DEL00053776 | chr15 | 9,351,776 | 9,351,827 | 51     | Loss |
| DEL00053779 | chr15 | 9,360,896 | 9,372,145 | 11,249 | Loss |
| DEL00053785 | chr15 | 9,376,073 | 9,376,196 | 123    | Loss |
| DEL00053786 | chr15 | 9,407,611 | 9,407,697 | 86     | Loss |
| DUP00053807 | chr15 | 9,907,780 | 9,908,132 | 352    | Gain |

|             |       |            |            |         |       |
|-------------|-------|------------|------------|---------|-------|
| DUP00053810 | chr15 | 10,015,606 | 10,026,627 | 11,021  | Mixed |
| DEL00053816 | chr15 | 10,132,526 | 10,132,613 | 87      | Loss  |
| DEL00053823 | chr15 | 10,305,669 | 10,306,054 | 385     | Loss  |
| DEL00053848 | chr15 | 10,571,032 | 10,571,157 | 125     | Loss  |
| DEL00053849 | chr15 | 10,606,919 | 10,607,011 | 92      | Loss  |
| DEL00053871 | chr15 | 10,966,842 | 10,967,330 | 488     | Loss  |
| DEL00053888 | chr15 | 11,389,769 | 11,390,056 | 287     | Loss  |
| DEL00053904 | chr15 | 11,665,643 | 11,668,345 | 2,702   | Loss  |
| DEL00053906 | chr15 | 11,730,668 | 11,730,730 | 62      | Loss  |
| DEL00053908 | chr15 | 11,813,451 | 11,814,484 | 1,033   | Loss  |
| DEL00053914 | chr15 | 11,851,873 | 11,852,040 | 167     | Loss  |
| DEL00053920 | chr15 | 12,031,995 | 12,032,060 | 65      | Loss  |
| DEL00053926 | chr15 | 12,169,073 | 12,169,141 | 68      | Loss  |
| DEL00053930 | chr15 | 12,244,414 | 12,244,677 | 263     | Loss  |
| DUP00054265 | chr16 | 449,719    | 991,794    | 542,075 | Mixed |
| DEL00054880 | chr16 | 1,048,122  | 1,048,585  | 463     | Loss  |
| DEL00054926 | chr16 | 1,196,385  | 1,197,246  | 861     | Loss  |
| DEL00054927 | chr16 | 1,201,753  | 1,201,826  | 73      | Loss  |
| DUP00054936 | chr16 | 1,221,270  | 1,222,026  | 756     | Gain  |
| DEL00054966 | chr16 | 1,231,705  | 1,232,110  | 405     | Loss  |
| DUP00054969 | chr16 | 1,232,181  | 1,235,153  | 2,972   | Gain  |
| DEL00054989 | chr16 | 1,245,283  | 1,245,346  | 63      | Loss  |
| DUP00055049 | chr16 | 1,314,838  | 1,381,552  | 66,714  | Gain  |
| DUP00055231 | chr16 | 1,480,577  | 1,481,184  | 607     | Gain  |
| DUP00055246 | chr16 | 1,586,928  | 1,587,009  | 81      | Gain  |
| DEL00055265 | chr17 | 33,080     | 33,371     | 291     | Loss  |
| DEL00055266 | chr17 | 34,285     | 35,000     | 715     | Loss  |
| DUP00055283 | chr17 | 199,775    | 199,885    | 110     | Gain  |
| DEL00055293 | chr17 | 341,572    | 342,337    | 765     | Loss  |
| DEL00055311 | chr17 | 790,001    | 790,574    | 573     | Loss  |
| DEL00055314 | chr17 | 798,954    | 799,012    | 58      | Loss  |
| DEL00055321 | chr17 | 841,957    | 842,189    | 232     | Loss  |
| DEL00055322 | chr17 | 872,938    | 872,990    | 52      | Loss  |
| DEL00055324 | chr17 | 907,803    | 907,910    | 107     | Loss  |
| DEL00055337 | chr17 | 1,089,728  | 1,090,067  | 339     | Loss  |
| DEL00055341 | chr17 | 1,093,071  | 1,093,139  | 68      | Loss  |
| DEL00055345 | chr17 | 1,133,116  | 1,133,167  | 51      | Loss  |
| DEL00055346 | chr17 | 1,140,911  | 1,141,305  | 394     | Loss  |
| DEL00055371 | chr17 | 1,639,446  | 1,639,583  | 137     | Loss  |
| DEL00055375 | chr17 | 1,667,879  | 1,668,401  | 522     | Loss  |
| DEL00055383 | chr17 | 1,777,272  | 1,778,027  | 755     | Loss  |
| DEL00055384 | chr17 | 1,849,045  | 1,849,098  | 53      | Loss  |
| DEL00055394 | chr17 | 2,144,419  | 2,144,618  | 199     | Loss  |
| DEL00055413 | chr17 | 2,378,364  | 2,378,437  | 73      | Loss  |
| DEL00055416 | chr17 | 2,465,083  | 2,466,239  | 1,156   | Loss  |
| DEL00055428 | chr17 | 2,560,442  | 2,560,874  | 432     | Loss  |
| DEL00055429 | chr17 | 2,644,678  | 2,644,799  | 121     | Loss  |
| DEL00055455 | chr17 | 3,525,542  | 3,525,595  | 53      | Loss  |
| DEL00055458 | chr17 | 3,680,671  | 3,680,747  | 76      | Loss  |

|             |       |            |            |       |       |
|-------------|-------|------------|------------|-------|-------|
| DEL00055470 | chr17 | 4,150,135  | 4,155,031  | 4,896 | Loss  |
| DEL00055472 | chr17 | 4,187,888  | 4,187,946  | 58    | Loss  |
| DEL00055477 | chr17 | 4,219,535  | 4,219,699  | 164   | Loss  |
| DEL00055480 | chr17 | 4,241,596  | 4,241,678  | 82    | Loss  |
| DEL00055504 | chr17 | 4,835,195  | 4,835,410  | 215   | Loss  |
| DEL00055510 | chr17 | 5,076,061  | 5,076,234  | 173   | Loss  |
| DEL00055513 | chr17 | 5,147,030  | 5,147,132  | 102   | Loss  |
| DEL00055523 | chr17 | 5,431,891  | 5,432,374  | 483   | Loss  |
| DEL00055531 | chr17 | 5,599,328  | 5,599,517  | 189   | Loss  |
| DEL00055536 | chr17 | 5,765,418  | 5,765,540  | 122   | Loss  |
| DEL00055537 | chr17 | 5,788,606  | 5,788,771  | 165   | Loss  |
| DEL00055539 | chr17 | 5,833,133  | 5,833,191  | 58    | Loss  |
| DUP00055551 | chr17 | 6,172,785  | 6,173,081  | 296   | Gain  |
| DEL00055564 | chr17 | 6,516,476  | 6,516,620  | 144   | Loss  |
| DEL00055573 | chr17 | 6,709,376  | 6,709,927  | 551   | Loss  |
| DEL00055576 | chr17 | 6,738,279  | 6,738,425  | 146   | Loss  |
| DUP00055583 | chr17 | 6,976,711  | 6,976,840  | 129   | Gain  |
| DEL00055587 | chr17 | 7,060,718  | 7,060,769  | 51    | Loss  |
| DEL00055592 | chr17 | 7,097,139  | 7,097,265  | 126   | Loss  |
| DEL00055595 | chr17 | 7,341,027  | 7,341,095  | 68    | Loss  |
| DEL00055597 | chr17 | 7,449,053  | 7,449,124  | 71    | Loss  |
| DEL00055598 | chr17 | 7,504,329  | 7,504,438  | 109   | Loss  |
| DEL00055606 | chr17 | 7,751,113  | 7,751,226  | 113   | Loss  |
| DEL00055613 | chr17 | 8,035,361  | 8,035,946  | 585   | Loss  |
| DUP00055616 | chr17 | 8,094,253  | 8,094,313  | 60    | Gain  |
| DEL00055620 | chr17 | 8,202,020  | 8,202,460  | 440   | Loss  |
| DEL00055628 | chr17 | 8,359,609  | 8,359,684  | 75    | Loss  |
| DEL00055635 | chr17 | 8,474,438  | 8,474,977  | 539   | Loss  |
| DEL00055649 | chr17 | 9,027,831  | 9,027,891  | 60    | Loss  |
| DEL00055664 | chr17 | 9,311,523  | 9,311,684  | 161   | Loss  |
| DEL00055666 | chr17 | 9,366,384  | 9,366,713  | 329   | Loss  |
| DEL00055686 | chr17 | 10,168,474 | 10,172,029 | 3,555 | Mixed |
| DEL00055719 | chr17 | 10,228,908 | 10,229,675 | 767   | Loss  |
| DUP00055749 | chr18 | 466,334    | 468,539    | 2,205 | Gain  |
| DEL00055764 | chr18 | 469,793    | 471,960    | 2,167 | Loss  |
| DUP00055774 | chr18 | 472,153    | 472,746    | 593   | Gain  |
| DUP00055777 | chr18 | 473,183    | 475,555    | 2,372 | Gain  |
| DEL00055793 | chr18 | 767,541    | 768,586    | 1,045 | Loss  |
| DEL00055804 | chr18 | 903,558    | 908,243    | 4,685 | Loss  |
| DEL00055838 | chr18 | 1,036,616  | 1,036,941  | 325   | Loss  |
| DEL00055840 | chr18 | 1,063,761  | 1,063,818  | 57    | Loss  |
| DEL00055853 | chr18 | 1,153,400  | 1,153,645  | 245   | Loss  |
| DEL00055862 | chr18 | 1,204,917  | 1,205,132  | 215   | Loss  |
| DEL00055863 | chr18 | 1,235,934  | 1,236,176  | 242   | Loss  |
| DEL00055864 | chr18 | 1,255,266  | 1,255,326  | 60    | Loss  |
| DEL00055865 | chr18 | 1,261,679  | 1,261,840  | 161   | Loss  |
| DEL00055869 | chr18 | 1,373,629  | 1,373,683  | 54    | Loss  |
| DEL00055870 | chr18 | 1,379,923  | 1,381,703  | 1,780 | Loss  |
| DEL00055871 | chr18 | 1,385,083  | 1,385,425  | 342   | Loss  |



|             |       |           |           |        |       |
|-------------|-------|-----------|-----------|--------|-------|
| DEL00055872 | chr18 | 1,432,998 | 1,433,502 | 504    | Loss  |
| DEL00055884 | chr18 | 1,532,764 | 1,532,875 | 111    | Loss  |
| DEL00055890 | chr18 | 1,625,375 | 1,625,454 | 79     | Loss  |
| DEL00055896 | chr18 | 1,718,031 | 1,718,303 | 272    | Loss  |
| DEL00055898 | chr18 | 1,745,814 | 1,745,880 | 66     | Loss  |
| DEL00055910 | chr18 | 1,833,615 | 1,834,303 | 688    | Loss  |
| DEL00055931 | chr18 | 2,064,845 | 2,065,245 | 400    | Loss  |
| DEL00056026 | chr18 | 2,303,735 | 2,339,506 | 35,771 | Mixed |
| DUP00056365 | chr18 | 2,394,840 | 2,406,218 | 11,378 | Gain  |
| DEL00056409 | chr18 | 2,855,680 | 2,855,750 | 70     | Loss  |
| DEL00056414 | chr18 | 2,927,033 | 2,927,222 | 189    | Loss  |
| DEL00056425 | chr18 | 3,165,089 | 3,165,231 | 142    | Loss  |
| DEL00056430 | chr18 | 3,193,718 | 3,196,951 | 3,233  | Loss  |
| DEL00056446 | chr18 | 3,341,346 | 3,341,720 | 374    | Loss  |
| DEL00056458 | chr18 | 3,678,522 | 3,678,837 | 315    | Loss  |
| DEL00056473 | chr18 | 3,902,868 | 3,902,926 | 58     | Loss  |
| DEL00056475 | chr18 | 3,957,707 | 3,958,153 | 446    | Loss  |
| DEL00056488 | chr18 | 4,174,944 | 4,175,029 | 85     | Loss  |
| DEL00056492 | chr18 | 4,249,067 | 4,249,497 | 430    | Loss  |
| DEL00056502 | chr18 | 4,395,557 | 4,395,671 | 114    | Loss  |
| DEL00056508 | chr18 | 4,481,925 | 4,482,030 | 105    | Loss  |
| DEL00056509 | chr18 | 4,499,942 | 4,500,041 | 99     | Loss  |
| DEL00056519 | chr18 | 4,652,075 | 4,652,149 | 74     | Loss  |
| DEL00056522 | chr18 | 4,681,517 | 4,682,792 | 1,275  | Loss  |
| DEL00056536 | chr18 | 5,140,090 | 5,140,141 | 51     | Loss  |
| DEL00056538 | chr18 | 5,242,331 | 5,242,401 | 70     | Loss  |
| DEL00056553 | chr18 | 5,532,876 | 5,532,939 | 63     | Loss  |
| DEL00056558 | chr18 | 5,572,646 | 5,572,725 | 79     | Loss  |
| DEL00056561 | chr18 | 5,920,832 | 5,920,981 | 149    | Loss  |
| DEL00056567 | chr18 | 6,032,871 | 6,033,028 | 157    | Loss  |
| DEL00056571 | chr18 | 6,160,533 | 6,161,051 | 518    | Loss  |
| DEL00056572 | chr18 | 6,194,993 | 6,195,075 | 82     | Loss  |
| DEL00056576 | chr18 | 6,256,069 | 6,256,194 | 125    | Loss  |
| DEL00056578 | chr18 | 6,280,343 | 6,280,394 | 51     | Loss  |
| DEL00056580 | chr18 | 6,295,267 | 6,295,326 | 59     | Loss  |
| DEL00056585 | chr18 | 6,327,642 | 6,328,764 | 1,122  | Loss  |
| DEL00056586 | chr18 | 6,350,026 | 6,351,356 | 1,330  | Loss  |
| DEL00056587 | chr18 | 6,393,809 | 6,394,229 | 420    | Loss  |
| DEL00056596 | chr18 | 6,526,633 | 6,526,755 | 122    | Loss  |
| DEL00056597 | chr18 | 6,605,075 | 6,605,192 | 117    | Loss  |
| DEL00056619 | chr18 | 7,235,707 | 7,235,769 | 62     | Loss  |
| DEL00056624 | chr18 | 7,257,104 | 7,257,367 | 263    | Loss  |
| DUP00056625 | chr18 | 7,284,722 | 7,303,508 | 18,786 | Mixed |
| DEL00056640 | chr18 | 7,881,086 | 7,881,254 | 168    | Loss  |
| DEL00056642 | chr18 | 8,000,412 | 8,001,400 | 988    | Loss  |
| DEL00056651 | chr18 | 8,152,819 | 8,152,921 | 102    | Loss  |
| DEL00056657 | chr18 | 8,395,324 | 8,395,488 | 164    | Loss  |
| DEL00056659 | chr18 | 8,447,113 | 8,447,186 | 73     | Loss  |
| DUP00056676 | chr18 | 8,766,751 | 8,766,884 | 133    | Gain  |

|             |       |            |            |        |       |
|-------------|-------|------------|------------|--------|-------|
| DEL00056681 | chr18 | 8,902,142  | 8,902,889  | 747    | Loss  |
| DEL00056694 | chr18 | 9,310,705  | 9,310,766  | 61     | Loss  |
| DEL00056697 | chr18 | 9,407,335  | 9,407,846  | 511    | Loss  |
| DEL00056704 | chr18 | 9,450,341  | 9,450,405  | 64     | Loss  |
| DEL00056707 | chr18 | 9,456,443  | 9,456,557  | 114    | Loss  |
| DEL00056725 | chr18 | 9,822,619  | 9,822,671  | 52     | Loss  |
| DEL00056746 | chr18 | 10,344,727 | 10,344,827 | 100    | Loss  |
| DEL00056753 | chr18 | 10,549,897 | 10,549,989 | 92     | Loss  |
| DEL00056757 | chr18 | 10,667,101 | 10,667,194 | 93     | Loss  |
| DEL00056758 | chr18 | 10,683,934 | 10,683,997 | 63     | Loss  |
| DEL00056762 | chr18 | 10,817,575 | 10,817,628 | 53     | Loss  |
| DEL00056766 | chr18 | 10,987,591 | 10,987,647 | 56     | Loss  |
| DEL00056775 | chr18 | 11,425,686 | 11,427,181 | 1,495  | Mixed |
| DEL00056781 | chr19 | 230,021    | 230,086    | 65     | Loss  |
| DUP00056792 | chr19 | 279,373    | 289,629    | 10,256 | Mixed |
| DUP00056810 | chr19 | 289,901    | 297,061    | 7,160  | Mixed |
| DUP00056825 | chr19 | 300,251    | 305,115    | 4,864  | Mixed |
| DEL00056833 | chr19 | 307,602    | 307,664    | 62     | Loss  |
| DEL00056843 | chr19 | 478,767    | 480,696    | 1,929  | Loss  |
| DEL00056849 | chr19 | 517,355    | 517,625    | 270    | Loss  |
| DEL00056871 | chr19 | 649,915    | 650,075    | 160    | Loss  |
| DEL00056899 | chr19 | 1,154,069  | 1,154,622  | 553    | Loss  |
| DEL00056904 | chr19 | 1,291,455  | 1,291,734  | 279    | Loss  |
| DEL00056909 | chr19 | 1,313,037  | 1,313,100  | 63     | Loss  |
| DEL00056918 | chr19 | 1,421,157  | 1,421,592  | 435    | Loss  |
| DEL00056926 | chr19 | 1,493,167  | 1,494,074  | 907    | Loss  |
| DEL00056931 | chr19 | 1,554,764  | 1,554,977  | 213    | Loss  |
| DEL00056940 | chr19 | 1,705,710  | 1,705,857  | 147    | Loss  |
| DEL00056943 | chr19 | 1,767,395  | 1,767,934  | 539    | Loss  |
| DEL00056950 | chr19 | 1,870,634  | 1,873,761  | 3,127  | Loss  |
| DEL00056956 | chr19 | 2,018,447  | 2,018,675  | 228    | Loss  |
| DEL00056958 | chr19 | 2,042,212  | 2,042,489  | 277    | Loss  |
| DEL00056964 | chr19 | 2,085,550  | 2,085,681  | 131    | Loss  |
| DEL00056965 | chr19 | 2,152,748  | 2,152,940  | 192    | Loss  |
| DEL00056971 | chr19 | 2,254,906  | 2,254,957  | 51     | Loss  |
| DEL00056972 | chr19 | 2,257,574  | 2,257,650  | 76     | Loss  |
| DEL00056980 | chr19 | 2,347,831  | 2,347,990  | 159    | Loss  |
| DEL00056982 | chr19 | 2,392,930  | 2,401,047  | 8,117  | Loss  |
| DEL00056983 | chr19 | 2,408,608  | 2,408,679  | 71     | Loss  |
| DEL00056985 | chr19 | 2,474,851  | 2,480,684  | 5,833  | Loss  |
| DEL00056989 | chr19 | 2,486,786  | 2,486,840  | 54     | Loss  |
| DEL00056995 | chr19 | 2,549,858  | 2,549,933  | 75     | Loss  |
| DEL00056998 | chr19 | 2,623,224  | 2,623,466  | 242    | Loss  |
| DEL00057001 | chr19 | 2,638,727  | 2,638,801  | 74     | Loss  |
| DEL00057006 | chr19 | 2,726,107  | 2,726,175  | 68     | Loss  |
| DEL00057008 | chr19 | 2,843,583  | 2,844,317  | 734    | Loss  |
| DEL00057016 | chr19 | 2,881,392  | 2,881,636  | 244    | Loss  |
| DEL00057019 | chr19 | 2,898,811  | 2,899,006  | 195    | Loss  |
| DUP00057021 | chr19 | 2,903,935  | 2,916,700  | 12,765 | Mixed |

|             |       |            |            |       |      |
|-------------|-------|------------|------------|-------|------|
| DEL00057025 | chr19 | 2,984,462  | 2,984,589  | 127   | Loss |
| DEL00057029 | chr19 | 3,034,337  | 3,034,390  | 53    | Loss |
| DEL00057051 | chr19 | 3,341,786  | 3,341,938  | 152   | Loss |
| DEL00057063 | chr19 | 3,613,380  | 3,613,651  | 271   | Loss |
| DEL00057067 | chr19 | 3,755,094  | 3,755,655  | 561   | Loss |
| DEL00057072 | chr19 | 3,873,623  | 3,873,757  | 134   | Loss |
| DEL00057078 | chr19 | 4,002,904  | 4,002,956  | 52    | Loss |
| DEL00057083 | chr19 | 4,096,026  | 4,096,106  | 80    | Loss |
| DEL00057093 | chr19 | 4,255,332  | 4,255,744  | 412   | Loss |
| DEL00057101 | chr19 | 4,373,595  | 4,373,665  | 70    | Loss |
| DEL00057108 | chr19 | 4,620,391  | 4,620,864  | 473   | Loss |
| DEL00057109 | chr19 | 4,635,175  | 4,635,237  | 62    | Loss |
| DEL00057144 | chr19 | 5,521,808  | 5,522,002  | 194   | Loss |
| DEL00057146 | chr19 | 5,581,654  | 5,581,739  | 85    | Loss |
| DEL00057154 | chr19 | 5,741,450  | 5,741,514  | 64    | Loss |
| DEL00057159 | chr19 | 5,916,340  | 5,916,426  | 86    | Loss |
| DEL00057168 | chr19 | 6,146,245  | 6,146,302  | 57    | Loss |
| DEL00057176 | chr19 | 6,348,359  | 6,348,517  | 158   | Loss |
| DEL00057185 | chr19 | 6,632,624  | 6,632,754  | 130   | Loss |
| DEL00057207 | chr19 | 7,696,218  | 7,696,275  | 57    | Loss |
| DEL00057208 | chr19 | 7,823,353  | 7,823,548  | 195   | Loss |
| DUP00057209 | chr19 | 7,853,986  | 7,854,043  | 57    | Gain |
| DEL00057210 | chr19 | 7,909,373  | 7,909,426  | 53    | Loss |
| DEL00057216 | chr19 | 8,010,018  | 8,010,190  | 172   | Loss |
| DEL00057219 | chr19 | 8,095,109  | 8,095,246  | 137   | Loss |
| DEL00057224 | chr19 | 8,262,952  | 8,263,006  | 54    | Loss |
| DEL00057227 | chr19 | 8,311,771  | 8,312,134  | 363   | Loss |
| DEL00057240 | chr19 | 8,895,759  | 8,895,811  | 52    | Loss |
| DEL00057250 | chr19 | 9,237,887  | 9,237,950  | 63    | Loss |
| DEL00057281 | chr19 | 10,397,148 | 10,397,563 | 415   | Loss |
| DUP00057284 | chr20 | 12,265     | 13,368     | 1,103 | Gain |
| DUP00057302 | chr20 | 28,840     | 28,970     | 130   | Gain |
| DEL00057304 | chr20 | 34,456     | 35,755     | 1,299 | Loss |
| DEL00057307 | chr20 | 37,078     | 37,129     | 51    | Loss |
| DEL00057317 | chr20 | 580,653    | 580,726    | 73    | Loss |
| DEL00057320 | chr20 | 664,440    | 664,520    | 80    | Loss |
| DEL00057321 | chr20 | 667,898    | 668,125    | 227   | Loss |
| DEL00057335 | chr20 | 921,306    | 921,402    | 96    | Loss |
| DEL00057354 | chr20 | 1,138,790  | 1,139,290  | 500   | Loss |
| DEL00057355 | chr20 | 1,162,603  | 1,162,689  | 86    | Loss |
| DEL00057356 | chr20 | 1,193,615  | 1,199,156  | 5,541 | Loss |
| DEL00057369 | chr20 | 1,424,452  | 1,426,397  | 1,945 | Loss |
| DEL00057374 | chr20 | 1,567,723  | 1,567,882  | 159   | Loss |
| DEL00057375 | chr20 | 1,588,482  | 1,594,315  | 5,833 | Loss |
| DEL00057390 | chr20 | 1,732,403  | 1,732,559  | 156   | Loss |
| DEL00057406 | chr20 | 2,051,162  | 2,051,601  | 439   | Loss |
| DUP00057408 | chr20 | 2,061,326  | 2,061,458  | 132   | Gain |
| DEL00057443 | chr20 | 2,209,339  | 2,210,067  | 728   | Loss |
| DEL00057445 | chr20 | 2,223,748  | 2,224,034  | 286   | Loss |

|             |       |           |           |       |      |
|-------------|-------|-----------|-----------|-------|------|
| DEL00057446 | chr20 | 2,272,687 | 2,272,767 | 80    | Loss |
| DEL00057450 | chr20 | 2,350,882 | 2,350,964 | 82    | Loss |
| DEL00057451 | chr20 | 2,370,860 | 2,371,327 | 467   | Loss |
| DEL00057476 | chr20 | 2,552,392 | 2,552,461 | 69    | Loss |
| DEL00057480 | chr20 | 2,674,898 | 2,674,999 | 101   | Loss |
| DEL00057483 | chr20 | 2,832,581 | 2,832,639 | 58    | Loss |
| DEL00057485 | chr20 | 2,899,812 | 2,900,362 | 550   | Loss |
| DEL00057494 | chr20 | 3,028,034 | 3,028,428 | 394   | Loss |
| DEL00057495 | chr20 | 3,033,070 | 3,033,202 | 132   | Loss |
| DEL00057497 | chr20 | 3,060,070 | 3,060,279 | 209   | Loss |
| DEL00057499 | chr20 | 3,085,374 | 3,085,566 | 192   | Loss |
| DEL00057533 | chr20 | 3,311,969 | 3,312,111 | 142   | Loss |
| DEL00057540 | chr20 | 3,434,866 | 3,435,068 | 202   | Loss |
| DEL00057558 | chr20 | 3,678,545 | 3,679,025 | 480   | Loss |
| DEL00057565 | chr20 | 3,760,613 | 3,760,835 | 222   | Loss |
| DEL00057566 | chr20 | 3,786,320 | 3,786,406 | 86    | Loss |
| DEL00057568 | chr20 | 3,808,380 | 3,808,537 | 157   | Loss |
| DEL00057571 | chr20 | 3,891,808 | 3,891,964 | 156   | Loss |
| DEL00057572 | chr20 | 3,928,479 | 3,928,888 | 409   | Loss |
| DEL00057582 | chr20 | 4,094,748 | 4,097,503 | 2,755 | Loss |
| DEL00057590 | chr20 | 4,206,281 | 4,206,339 | 58    | Loss |
| DEL00057593 | chr20 | 4,273,489 | 4,274,090 | 601   | Loss |
| DEL00057595 | chr20 | 4,281,065 | 4,283,023 | 1,958 | Loss |
| DEL00057599 | chr20 | 4,311,040 | 4,311,172 | 132   | Loss |
| DEL00057608 | chr20 | 4,412,715 | 4,413,218 | 503   | Loss |
| DEL00057615 | chr20 | 4,452,787 | 4,453,119 | 332   | Loss |
| DEL00057618 | chr20 | 4,540,211 | 4,540,304 | 93    | Loss |
| DEL00057622 | chr20 | 4,669,028 | 4,669,277 | 249   | Loss |
| DEL00057642 | chr20 | 5,038,591 | 5,038,722 | 131   | Loss |
| DEL00057647 | chr20 | 5,138,697 | 5,139,769 | 1,072 | Loss |
| DEL00057657 | chr20 | 5,247,844 | 5,248,103 | 259   | Loss |
| DEL00057681 | chr20 | 5,700,841 | 5,701,258 | 417   | Loss |
| DEL00057682 | chr20 | 5,712,784 | 5,712,887 | 103   | Loss |
| DEL00057684 | chr20 | 5,758,924 | 5,758,983 | 59    | Loss |
| DEL00057687 | chr20 | 5,876,950 | 5,877,366 | 416   | Loss |
| DEL00057690 | chr20 | 5,945,556 | 5,946,974 | 1,418 | Loss |
| DEL00057691 | chr20 | 5,959,871 | 5,959,991 | 120   | Loss |
| DEL00057701 | chr20 | 6,146,942 | 6,156,712 | 9,770 | Loss |
| DEL00057709 | chr20 | 6,280,130 | 6,280,211 | 81    | Loss |
| DEL00057711 | chr20 | 6,500,862 | 6,500,950 | 88    | Loss |
| DEL00057713 | chr20 | 6,539,964 | 6,540,021 | 57    | Loss |
| DEL00057714 | chr20 | 6,556,214 | 6,556,273 | 59    | Loss |
| DEL00057718 | chr20 | 6,579,665 | 6,579,723 | 58    | Loss |
| DEL00057719 | chr20 | 6,592,715 | 6,593,762 | 1,047 | Loss |
| DEL00057722 | chr20 | 6,611,112 | 6,611,528 | 416   | Loss |
| DEL00057729 | chr20 | 6,708,094 | 6,708,192 | 98    | Loss |
| DEL00057754 | chr20 | 6,970,709 | 6,971,216 | 507   | Loss |
| DEL00057767 | chr20 | 7,396,768 | 7,396,943 | 175   | Loss |
| DEL00057768 | chr20 | 7,425,558 | 7,429,792 | 4,234 | Loss |

|             |       |            |            |        |       |
|-------------|-------|------------|------------|--------|-------|
| DEL00057780 | chr20 | 7,614,059  | 7,614,172  | 113    | Loss  |
| DEL00057785 | chr20 | 7,805,554  | 7,805,792  | 238    | Loss  |
| DEL00057797 | chr20 | 8,265,042  | 8,266,087  | 1,045  | Loss  |
| DEL00057798 | chr20 | 8,326,300  | 8,326,374  | 74     | Loss  |
| DEL00057801 | chr20 | 8,356,478  | 8,356,560  | 82     | Loss  |
| DEL00057807 | chr20 | 8,484,434  | 8,484,592  | 158    | Loss  |
| DEL00057819 | chr20 | 8,630,476  | 8,630,561  | 85     | Loss  |
| DEL00057823 | chr20 | 8,661,574  | 8,662,225  | 651    | Loss  |
| DEL00057826 | chr20 | 8,755,756  | 8,755,823  | 67     | Loss  |
| DEL00057828 | chr20 | 8,860,388  | 8,860,527  | 139    | Loss  |
| DEL00057833 | chr20 | 8,986,817  | 8,986,882  | 65     | Loss  |
| DEL00057840 | chr20 | 9,180,551  | 9,180,623  | 72     | Loss  |
| DEL00057843 | chr20 | 9,188,550  | 9,190,324  | 1,774  | Loss  |
| DEL00057848 | chr20 | 9,284,667  | 9,284,839  | 172    | Loss  |
| DEL00057853 | chr20 | 9,329,169  | 9,329,238  | 69     | Loss  |
| DEL00057857 | chr20 | 9,502,952  | 9,503,056  | 104    | Loss  |
| DUP00057878 | chr20 | 9,901,624  | 9,901,877  | 253    | Gain  |
| DEL00057896 | chr20 | 10,571,818 | 10,571,938 | 120    | Loss  |
| DEL00057897 | chr20 | 10,588,736 | 10,588,803 | 67     | Loss  |
| DEL00057902 | chr20 | 10,836,281 | 10,836,448 | 167    | Loss  |
| DUP00057903 | chr20 | 10,935,413 | 10,951,434 | 16,021 | Mixed |
| DEL00057906 | chr20 | 11,103,013 | 11,103,520 | 507    | Loss  |
| DEL00057909 | chr20 | 11,176,638 | 11,176,763 | 125    | Loss  |
| DEL00057918 | chr20 | 11,412,161 | 11,412,765 | 604    | Loss  |
| DEL00057921 | chr20 | 11,624,800 | 11,625,109 | 309    | Loss  |
| DEL00057926 | chr20 | 11,707,341 | 11,707,426 | 85     | Loss  |
| DEL00057934 | chr20 | 11,813,271 | 11,813,329 | 58     | Loss  |
| DEL00057937 | chr20 | 11,931,891 | 11,932,044 | 153    | Loss  |
| DEL00057942 | chr20 | 12,121,451 | 12,121,531 | 80     | Loss  |
| DEL00057943 | chr20 | 12,153,354 | 12,153,435 | 81     | Loss  |
| DEL00057946 | chr20 | 12,181,566 | 12,181,653 | 87     | Loss  |
| DEL00057948 | chr20 | 12,233,687 | 12,233,809 | 122    | Loss  |
| DEL00057951 | chr20 | 12,252,807 | 12,253,043 | 236    | Loss  |
| DEL00057959 | chr20 | 12,407,483 | 12,407,601 | 118    | Loss  |
| DEL00057967 | chr20 | 12,566,986 | 12,567,660 | 674    | Loss  |
| DEL00057968 | chr20 | 12,646,055 | 12,646,125 | 70     | Loss  |
| DUP00057981 | chr20 | 12,951,894 | 12,952,156 | 262    | Gain  |
| DEL00057983 | chr20 | 12,966,595 | 12,966,648 | 53     | Loss  |
| DEL00057984 | chr20 | 12,974,816 | 12,977,287 | 2,471  | Loss  |
| DEL00057985 | chr20 | 13,015,536 | 13,015,606 | 70     | Loss  |
| DEL00057986 | chr20 | 13,039,179 | 13,039,263 | 84     | Loss  |
| DEL00057994 | chr20 | 13,429,199 | 13,429,289 | 90     | Loss  |
| DEL00058038 | chr21 | 423,814    | 424,009    | 195    | Loss  |
| DEL00058053 | chr21 | 713,549    | 713,759    | 210    | Loss  |
| DEL00058059 | chr21 | 778,694    | 778,816    | 122    | Loss  |
| DEL00058060 | chr21 | 791,930    | 791,991    | 61     | Loss  |
| DEL00058066 | chr21 | 973,551    | 974,381    | 830    | Loss  |
| DEL00058087 | chr21 | 1,371,093  | 1,371,183  | 90     | Loss  |
| DEL00058089 | chr21 | 1,388,419  | 1,388,591  | 172    | Loss  |

|             |       |           |           |        |       |
|-------------|-------|-----------|-----------|--------|-------|
| DEL00058092 | chr21 | 1,804,654 | 1,804,819 | 165    | Loss  |
| DEL00058094 | chr21 | 1,880,821 | 1,881,178 | 357    | Loss  |
| DUP00058097 | chr21 | 2,074,556 | 2,101,830 | 27,274 | Mixed |
| DEL00058116 | chr21 | 2,559,323 | 2,559,431 | 108    | Loss  |
| DEL00058117 | chr21 | 2,562,127 | 2,562,292 | 165    | Loss  |
| DEL00058118 | chr21 | 2,568,255 | 2,568,328 | 73     | Loss  |
| DEL00058120 | chr21 | 2,611,693 | 2,611,826 | 133    | Loss  |
| DUP00058133 | chr21 | 2,765,276 | 2,765,449 | 173    | Gain  |
| DEL00058136 | chr21 | 2,770,321 | 2,770,399 | 78     | Loss  |
| DEL00058160 | chr21 | 3,159,288 | 3,159,571 | 283    | Loss  |
| DEL00058167 | chr21 | 3,421,815 | 3,421,882 | 67     | Loss  |
| DEL00058173 | chr21 | 3,536,050 | 3,536,124 | 74     | Loss  |
| DEL00058193 | chr21 | 4,068,350 | 4,068,431 | 81     | Loss  |
| DEL00058202 | chr21 | 4,550,257 | 4,550,380 | 123    | Loss  |
| DEL00058203 | chr21 | 4,555,490 | 4,555,616 | 126    | Loss  |
| DUP00058207 | chr21 | 4,599,099 | 4,599,213 | 114    | Gain  |
| DEL00058213 | chr21 | 4,730,698 | 4,731,012 | 314    | Loss  |
| DUP00058215 | chr21 | 4,751,835 | 4,751,975 | 140    | Gain  |
| DEL00058228 | chr21 | 4,839,485 | 4,839,543 | 58     | Loss  |
| DEL00058230 | chr21 | 4,864,890 | 4,866,487 | 1,597  | Mixed |
| DEL00058243 | chr21 | 4,899,611 | 4,899,681 | 70     | Loss  |
| DEL00058260 | chr21 | 5,023,584 | 5,023,641 | 57     | Loss  |
| DEL00058282 | chr21 | 5,277,440 | 5,278,173 | 733    | Loss  |
| DEL00058288 | chr21 | 5,436,656 | 5,436,712 | 56     | Loss  |
| DEL00058300 | chr21 | 5,559,075 | 5,559,202 | 127    | Loss  |
| DEL00058303 | chr21 | 5,597,549 | 5,597,624 | 75     | Loss  |
| DEL00058304 | chr21 | 5,633,348 | 5,633,435 | 87     | Loss  |
| DEL00058338 | chr21 | 5,999,300 | 5,999,352 | 52     | Loss  |
| DEL00058341 | chr21 | 6,057,395 | 6,057,454 | 59     | Loss  |
| DEL00058350 | chr21 | 6,073,550 | 6,073,688 | 138    | Loss  |
| DEL00058367 | chr21 | 6,255,462 | 6,255,539 | 77     | Loss  |
| DUP00058385 | chr21 | 6,453,148 | 6,453,292 | 144    | Gain  |
| DEL00058398 | chr21 | 6,592,087 | 6,592,155 | 68     | Loss  |
| DEL00058403 | chr21 | 6,657,739 | 6,658,379 | 640    | Loss  |
| DEL00058406 | chr21 | 6,744,024 | 6,744,584 | 560    | Loss  |
| DEL00058437 | chr22 | 239,179   | 240,499   | 1,320  | Loss  |
| DEL00058441 | chr22 | 325,357   | 326,210   | 853    | Loss  |
| DEL00058450 | chr22 | 636,263   | 636,338   | 75     | Loss  |
| DEL00058451 | chr22 | 748,439   | 748,492   | 53     | Loss  |
| DEL00058452 | chr22 | 771,018   | 771,908   | 890    | Loss  |
| DEL00058463 | chr22 | 1,329,548 | 1,329,928 | 380    | Loss  |
| DUP00058474 | chr22 | 1,458,023 | 1,458,571 | 548    | Gain  |
| DEL00058485 | chr22 | 2,192,334 | 2,192,391 | 57     | Loss  |
| DEL00058551 | chr22 | 3,165,030 | 3,165,085 | 55     | Loss  |
| DEL00058560 | chr22 | 3,229,043 | 3,229,463 | 420    | Loss  |
| DUP00058609 | chr22 | 3,300,551 | 3,300,718 | 167    | Gain  |
| DEL00058613 | chr22 | 3,300,796 | 3,301,278 | 482    | Loss  |
| DEL00058618 | chr22 | 3,301,445 | 3,302,080 | 635    | Loss  |
| DUP00058641 | chr22 | 3,303,351 | 3,303,517 | 166    | Gain  |

|             |       |           |           |       |      |
|-------------|-------|-----------|-----------|-------|------|
| DUP00058660 | chr22 | 3,340,036 | 3,340,745 | 709   | Gain |
| DEL00058676 | chr22 | 3,353,684 | 3,353,887 | 203   | Loss |
| DEL00058780 | chr22 | 3,456,424 | 3,457,122 | 698   | Loss |
| DEL00058887 | chr22 | 3,950,889 | 3,951,775 | 886   | Loss |
| DEL00058888 | chr22 | 3,963,307 | 3,963,426 | 119   | Loss |
| DEL00058891 | chr22 | 4,092,233 | 4,093,572 | 1,339 | Loss |
| DEL00058905 | chr22 | 4,272,148 | 4,272,633 | 485   | Loss |
| DEL00058913 | chr22 | 4,335,055 | 4,339,718 | 4,663 | Loss |
| DEL00059044 | chr22 | 4,517,986 | 4,518,197 | 211   | Loss |
| DEL00059134 | chr23 | 412,947   | 413,379   | 432   | Loss |
| DEL00059141 | chr23 | 492,822   | 493,280   | 458   | Loss |
| DEL00059145 | chr23 | 537,751   | 537,824   | 73    | Loss |
| DEL00059154 | chr23 | 632,879   | 633,247   | 368   | Loss |
| DEL00059169 | chr23 | 853,341   | 853,536   | 195   | Loss |
| DEL00059170 | chr23 | 921,304   | 921,437   | 133   | Loss |
| DEL00059171 | chr23 | 926,182   | 926,332   | 150   | Loss |
| DEL00059179 | chr23 | 1,044,174 | 1,044,634 | 460   | Loss |
| DEL00059182 | chr23 | 1,119,538 | 1,119,659 | 121   | Loss |
| DEL00059192 | chr23 | 1,195,291 | 1,195,366 | 75    | Loss |
| DEL00059211 | chr23 | 1,379,997 | 1,380,059 | 62    | Loss |
| DEL00059213 | chr23 | 1,411,907 | 1,411,970 | 63    | Loss |
| DEL00059216 | chr23 | 1,455,801 | 1,455,897 | 96    | Loss |
| DEL00059217 | chr23 | 1,492,751 | 1,492,929 | 178   | Loss |
| DEL00059219 | chr23 | 1,508,224 | 1,508,445 | 221   | Loss |
| DEL00059220 | chr23 | 1,515,547 | 1,515,721 | 174   | Loss |
| DEL00059221 | chr23 | 1,522,482 | 1,522,580 | 98    | Loss |
| DEL00059228 | chr23 | 1,616,280 | 1,616,430 | 150   | Loss |
| DEL00059237 | chr23 | 1,701,907 | 1,702,701 | 794   | Loss |
| DEL00059240 | chr23 | 1,727,405 | 1,728,524 | 1,119 | Loss |
| DEL00059246 | chr23 | 1,803,680 | 1,803,752 | 72    | Loss |
| DEL00059248 | chr23 | 1,834,755 | 1,834,831 | 76    | Loss |
| DEL00059250 | chr23 | 1,892,021 | 1,892,093 | 72    | Loss |
| DEL00059292 | chr23 | 2,005,871 | 2,005,937 | 66    | Loss |
| DEL00059307 | chr23 | 2,058,405 | 2,058,498 | 93    | Loss |
| DEL00059312 | chr23 | 2,065,919 | 2,066,277 | 358   | Loss |
| DEL00059314 | chr23 | 2,084,862 | 2,084,932 | 70    | Loss |
| DEL00059318 | chr23 | 2,167,459 | 2,167,533 | 74    | Loss |
| DEL00059319 | chr23 | 2,194,879 | 2,194,945 | 66    | Loss |
| DEL00059329 | chr23 | 2,250,442 | 2,250,511 | 69    | Loss |
| DEL00059334 | chr23 | 2,276,693 | 2,276,745 | 52    | Loss |
| DEL00059336 | chr23 | 2,277,073 | 2,277,155 | 82    | Loss |
| DEL00059341 | chr23 | 2,339,625 | 2,339,725 | 100   | Loss |
| DEL00059348 | chr23 | 2,436,351 | 2,442,715 | 6,364 | Loss |
| DUP00059361 | chr23 | 2,548,640 | 2,548,802 | 162   | Gain |
| DUP00059365 | chr23 | 2,550,245 | 2,550,321 | 76    | Gain |
| DEL00059381 | chr23 | 2,920,918 | 2,921,174 | 256   | Loss |
| DEL00059384 | chr23 | 3,009,592 | 3,010,105 | 513   | Loss |
| DEL00059386 | chr23 | 3,073,913 | 3,074,033 | 120   | Loss |
| DEL00059400 | chr23 | 3,261,832 | 3,261,893 | 61    | Loss |

|             |       |           |           |       |      |
|-------------|-------|-----------|-----------|-------|------|
| DEL00059404 | chr23 | 3,392,123 | 3,392,311 | 188   | Loss |
| DEL00059411 | chr23 | 3,574,485 | 3,574,647 | 162   | Loss |
| DEL00059412 | chr23 | 3,602,997 | 3,603,155 | 158   | Loss |
| DEL00059418 | chr23 | 3,733,417 | 3,733,481 | 64    | Loss |
| DUP00059457 | chr23 | 4,302,504 | 4,302,678 | 174   | Gain |
| DEL00059465 | chr23 | 4,423,927 | 4,424,407 | 480   | Loss |
| DEL00059466 | chr23 | 4,428,100 | 4,428,207 | 107   | Loss |
| DEL00059472 | chr23 | 4,591,792 | 4,591,934 | 142   | Loss |
| DEL00059473 | chr23 | 4,667,403 | 4,667,455 | 52    | Loss |
| DEL00059485 | chr23 | 4,897,079 | 4,897,222 | 143   | Loss |
| DEL00059487 | chr23 | 4,912,972 | 4,913,252 | 280   | Loss |
| DEL00059514 | chr23 | 5,339,041 | 5,339,196 | 155   | Loss |
| DEL00059515 | chr23 | 5,452,952 | 5,453,940 | 988   | Loss |
| DEL00059543 | chr24 | 468,025   | 468,118   | 93    | Loss |
| DEL00059545 | chr24 | 529,159   | 529,218   | 59    | Loss |
| DEL00059557 | chr24 | 806,897   | 807,016   | 119   | Loss |
| DEL00059561 | chr24 | 836,231   | 836,366   | 135   | Loss |
| DUP00059564 | chr24 | 932,231   | 932,395   | 164   | Gain |
| DEL00059566 | chr24 | 951,737   | 951,835   | 98    | Loss |
| DEL00059577 | chr24 | 1,188,744 | 1,189,317 | 573   | Loss |
| DEL00059582 | chr24 | 1,321,582 | 1,327,415 | 5,833 | Loss |
| DEL00059592 | chr24 | 1,762,088 | 1,762,168 | 80    | Loss |
| DEL00059609 | chr24 | 2,275,674 | 2,281,762 | 6,088 | Loss |
| DEL00059615 | chr24 | 2,414,139 | 2,414,199 | 60    | Loss |
| DEL00059617 | chr24 | 2,519,534 | 2,519,740 | 206   | Loss |
| DEL00059621 | chr24 | 2,688,578 | 2,688,929 | 351   | Loss |
| DEL00059622 | chr24 | 2,724,844 | 2,724,929 | 85    | Loss |
| DEL00059623 | chr24 | 2,766,907 | 2,767,042 | 135   | Loss |
| DEL00059631 | chr24 | 2,899,255 | 2,899,308 | 53    | Loss |
| DUP00059640 | chr24 | 3,297,279 | 3,297,374 | 95    | Gain |
| DEL00059656 | chr24 | 3,681,334 | 3,681,398 | 64    | Loss |
| DEL00059665 | chr24 | 3,791,327 | 3,791,381 | 54    | Loss |
| DEL00059676 | chr24 | 3,946,871 | 3,946,970 | 99    | Loss |
| DEL00059678 | chr24 | 3,976,722 | 3,976,793 | 71    | Loss |
| DEL00059679 | chr24 | 4,052,734 | 4,052,817 | 83    | Loss |
| DEL00059683 | chr24 | 4,133,406 | 4,133,484 | 78    | Loss |
| DEL00059693 | chr24 | 4,263,336 | 4,263,417 | 81    | Loss |
| DEL00059694 | chr24 | 4,298,034 | 4,298,131 | 97    | Loss |
| DEL00059697 | chr24 | 4,335,662 | 4,335,798 | 136   | Loss |
| DEL00059703 | chr24 | 4,446,411 | 4,446,514 | 103   | Loss |
| DEL00059708 | chr24 | 4,451,424 | 4,451,623 | 199   | Loss |
| DEL00059717 | chr24 | 4,723,605 | 4,723,674 | 69    | Loss |
| DEL00059725 | chr24 | 4,846,718 | 4,846,864 | 146   | Loss |
| DEL00059732 | chr24 | 4,995,912 | 4,996,197 | 285   | Loss |
| DEL00059748 | chr24 | 5,088,056 | 5,088,245 | 189   | Loss |
| DEL00059759 | chr24 | 5,099,250 | 5,099,369 | 119   | Loss |
| DEL00059762 | chr24 | 5,142,379 | 5,142,505 | 126   | Loss |
| DEL00059765 | chr24 | 5,193,047 | 5,193,175 | 128   | Loss |
| DEL00059782 | chr24 | 5,323,969 | 5,324,050 | 81    | Loss |



|             |       |           |           |        |       |
|-------------|-------|-----------|-----------|--------|-------|
| DEL00059887 | chr24 | 5,982,343 | 5,982,416 | 73     | Loss  |
| DEL00059953 | chr25 | 14,318    | 14,641    | 323    | Loss  |
| DEL00059982 | chr25 | 29,494    | 30,156    | 662    | Loss  |
| DUP00059992 | chr25 | 45,338    | 45,745    | 407    | Gain  |
| DEL00059997 | chr25 | 46,524    | 47,604    | 1,080  | Mixed |
| DUP00060021 | chr25 | 83,911    | 84,434    | 523    | Gain  |
| DUP00060030 | chr25 | 85,483    | 87,071    | 1,588  | Mixed |
| DEL00060058 | chr25 | 99,595    | 99,951    | 356    | Loss  |
| DUP00060103 | chr25 | 156,585   | 156,893   | 308    | Mixed |
| DEL00060133 | chr25 | 237,169   | 237,445   | 276    | Loss  |
| DEL00060147 | chr25 | 274,449   | 275,802   | 1,353  | Loss  |
| DUP00060170 | chr25 | 369,229   | 372,550   | 3,321  | Gain  |
| DUP00060193 | chr25 | 438,819   | 441,244   | 2,425  | Gain  |
| DEL00060205 | chr25 | 443,220   | 444,938   | 1,718  | Loss  |
| DEL00060211 | chr25 | 450,742   | 450,794   | 52     | Loss  |
| DEL00060213 | chr25 | 453,076   | 457,353   | 4,277  | Loss  |
| DUP00060259 | chr25 | 633,762   | 633,957   | 195    | Gain  |
| DUP00060271 | chr25 | 808,022   | 811,684   | 3,662  | Gain  |
| DUP00060291 | chr25 | 909,936   | 910,305   | 369    | Gain  |
| DEL00060299 | chr25 | 990,045   | 991,074   | 1,029  | Loss  |
| DEL00060361 | chr25 | 1,171,520 | 1,172,065 | 545    | Loss  |
| DUP00060384 | chr25 | 1,199,744 | 1,205,614 | 5,870  | Mixed |
| DEL00060450 | chr25 | 1,365,190 | 1,365,269 | 79     | Loss  |
| DEL00060453 | chr25 | 1,372,525 | 1,372,586 | 61     | Loss  |
| DUP00060456 | chr25 | 1,379,236 | 1,379,723 | 487    | Gain  |
| DUP00060526 | chr25 | 1,457,879 | 1,458,340 | 461    | Gain  |
| DUP00060550 | chr25 | 1,479,632 | 1,479,927 | 295    | Gain  |
| DEL00060565 | chr25 | 1,485,658 | 1,486,150 | 492    | Loss  |
| DUP00060572 | chr25 | 1,520,870 | 1,521,470 | 600    | Gain  |
| DEL00060586 | chr25 | 1,585,341 | 1,585,483 | 142    | Loss  |
| DEL00060628 | chr25 | 2,046,213 | 2,046,270 | 57     | Loss  |
| DEL00060640 | chr25 | 2,078,111 | 2,078,566 | 455    | Loss  |
| DEL00060644 | chr25 | 2,088,497 | 2,088,556 | 59     | Loss  |
| DEL00060654 | chr25 | 2,144,381 | 2,144,771 | 390    | Loss  |
| DEL00060683 | chr25 | 2,338,640 | 2,349,428 | 10,788 | Loss  |
| DEL00060704 | chr26 | 345,064   | 345,222   | 158    | Loss  |
| DEL00060707 | chr26 | 392,376   | 392,443   | 67     | Loss  |
| DEL00060715 | chr26 | 460,815   | 461,072   | 257    | Loss  |
| DEL00060721 | chr26 | 623,522   | 623,593   | 71     | Loss  |
| DEL00060726 | chr26 | 705,755   | 705,845   | 90     | Loss  |
| DEL00060731 | chr26 | 790,141   | 790,719   | 578    | Loss  |
| DEL00060746 | chr26 | 935,143   | 935,916   | 773    | Loss  |
| DEL00060748 | chr26 | 1,035,188 | 1,035,483 | 295    | Loss  |
| DEL00060798 | chr26 | 1,487,335 | 1,487,467 | 132    | Loss  |
| DEL00060800 | chr26 | 1,519,472 | 1,519,570 | 98     | Loss  |
| DEL00060835 | chr26 | 1,976,094 | 1,976,328 | 234    | Loss  |
| DEL00060846 | chr26 | 2,192,294 | 2,192,736 | 442    | Loss  |
| DEL00060849 | chr26 | 2,215,851 | 2,215,904 | 53     | Loss  |
| DEL00060850 | chr26 | 2,242,064 | 2,242,176 | 112    | Loss  |

|             |       |           |           |         |       |
|-------------|-------|-----------|-----------|---------|-------|
| DEL00060858 | chr26 | 2,472,179 | 2,472,316 | 137     | Loss  |
| DEL00060865 | chr26 | 2,613,855 | 2,613,970 | 115     | Loss  |
| DEL00060876 | chr26 | 2,751,486 | 2,752,033 | 547     | Loss  |
| DEL00060881 | chr26 | 2,831,352 | 2,831,430 | 78      | Loss  |
| DEL00060895 | chr26 | 3,017,060 | 3,017,307 | 247     | Loss  |
| DEL00060916 | chr26 | 3,318,375 | 3,318,544 | 169     | Loss  |
| DEL00060926 | chr26 | 3,385,759 | 3,385,810 | 51      | Loss  |
| DEL00060932 | chr26 | 3,425,847 | 3,425,934 | 87      | Loss  |
| DEL00060944 | chr26 | 3,543,768 | 3,544,090 | 322     | Loss  |
| DEL00060980 | chr26 | 4,210,511 | 4,210,955 | 444     | Loss  |
| DEL00060998 | chr26 | 4,673,739 | 4,673,963 | 224     | Loss  |
| DEL00061018 | chr26 | 4,955,082 | 4,955,190 | 108     | Loss  |
| DEL00061024 | chr26 | 5,050,613 | 5,063,657 | 13,044  | Loss  |
| DEL00061052 | chr26 | 5,257,353 | 5,259,792 | 2,439   | Loss  |
| DUP00061064 | chr26 | 5,265,219 | 5,266,525 | 1,306   | Gain  |
| DUP00061071 | chr26 | 5,277,546 | 5,278,147 | 601     | Gain  |
| DEL00061085 | chr27 | 27,863    | 31,393    | 3,530   | Loss  |
| DEL00061101 | chr27 | 126,197   | 127,312   | 1,115   | Loss  |
| DEL00061106 | chr27 | 172,165   | 174,180   | 2,015   | Loss  |
| DEL00061113 | chr27 | 176,106   | 198,281   | 22,175  | Loss  |
| DEL00061612 | chr27 | 422,822   | 478,741   | 55,919  | Mixed |
| DEL00061733 | chr27 | 535,223   | 535,447   | 224     | Loss  |
| DEL00061857 | chr27 | 585,409   | 897,118   | 311,709 | Mixed |
| DEL00062323 | chr27 | 1,380,612 | 1,380,695 | 83      | Loss  |
| DEL00062327 | chr27 | 1,428,772 | 1,429,055 | 283     | Loss  |
| DEL00062332 | chr27 | 1,458,062 | 1,458,443 | 381     | Loss  |
| DEL00062340 | chr27 | 1,547,038 | 1,547,091 | 53      | Loss  |
| DEL00062345 | chr27 | 1,581,837 | 1,582,505 | 668     | Loss  |
| DEL00062347 | chr27 | 1,599,561 | 1,599,725 | 164     | Loss  |
| DEL00062356 | chr27 | 1,673,052 | 1,673,153 | 101     | Loss  |
| DEL00062363 | chr27 | 1,681,678 | 1,682,007 | 329     | Loss  |
| DEL00062364 | chr27 | 1,695,490 | 1,695,683 | 193     | Loss  |
| DEL00062372 | chr27 | 1,746,398 | 1,746,502 | 104     | Loss  |
| DEL00062373 | chr27 | 1,774,687 | 1,774,791 | 104     | Loss  |
| DEL00062385 | chr27 | 1,842,862 | 1,842,917 | 55      | Loss  |
| DEL00062417 | chr27 | 1,884,716 | 1,885,110 | 394     | Loss  |
| DUP00062431 | chr27 | 1,894,283 | 1,894,720 | 437     | Gain  |
| DEL00062455 | chr27 | 1,943,821 | 1,943,949 | 128     | Loss  |
| DEL00062482 | chr27 | 2,064,147 | 2,064,947 | 800     | Loss  |
| DEL00062486 | chr27 | 2,078,692 | 2,078,838 | 146     | Loss  |
| DUP00062487 | chr27 | 2,081,989 | 2,082,216 | 227     | Gain  |
| DEL00062488 | chr27 | 2,111,228 | 2,111,312 | 84      | Loss  |
| DEL00062491 | chr27 | 2,152,549 | 2,152,648 | 99      | Loss  |
| DEL00062494 | chr27 | 2,201,858 | 2,202,385 | 527     | Loss  |
| DEL00062496 | chr27 | 2,240,238 | 2,240,332 | 94      | Loss  |
| DEL00062500 | chr27 | 2,313,831 | 2,313,927 | 96      | Loss  |
| DEL00062505 | chr27 | 2,331,535 | 2,331,624 | 89      | Loss  |
| DEL00062508 | chr27 | 2,439,439 | 2,440,413 | 974     | Loss  |
| DEL00062517 | chr27 | 2,568,743 | 2,568,805 | 62      | Loss  |

|             |       |           |           |        |       |
|-------------|-------|-----------|-----------|--------|-------|
| DEL00062537 | chr27 | 2,730,631 | 2,730,958 | 327    | Loss  |
| DEL00062558 | chr27 | 2,844,673 | 2,844,741 | 68     | Loss  |
| DEL00062562 | chr27 | 2,866,141 | 2,867,702 | 1,561  | Loss  |
| DEL00062585 | chr27 | 2,959,389 | 2,959,449 | 60     | Loss  |
| DEL00062594 | chr27 | 3,068,451 | 3,068,537 | 86     | Loss  |
| DEL00062598 | chr27 | 3,176,104 | 3,176,164 | 60     | Loss  |
| DEL00062654 | chr27 | 3,461,070 | 3,461,187 | 117    | Loss  |
| DUP00062655 | chr27 | 3,472,195 | 3,486,546 | 14,351 | Gain  |
| DEL00062663 | chr27 | 3,523,515 | 3,523,598 | 83     | Loss  |
| DEL00062668 | chr27 | 3,579,573 | 3,580,015 | 442    | Loss  |
| DEL00062679 | chr27 | 3,703,012 | 3,703,195 | 183    | Loss  |
| DEL00062685 | chr27 | 3,822,753 | 3,822,912 | 159    | Loss  |
| DEL00062691 | chr27 | 3,908,042 | 3,908,339 | 297    | Loss  |
| DUP00062695 | chr27 | 3,948,809 | 3,948,901 | 92     | Gain  |
| DEL00062699 | chr27 | 4,060,937 | 4,061,028 | 91     | Loss  |
| DEL00062710 | chr27 | 4,184,216 | 4,184,271 | 55     | Loss  |
| DEL00062725 | chr27 | 4,328,984 | 4,329,050 | 66     | Loss  |
| DEL00062815 | chr27 | 5,774,570 | 5,774,969 | 399    | Loss  |
| DUP00062820 | chr27 | 5,775,512 | 5,776,646 | 1,134  | Mixed |
| DEL00062854 | chr27 | 5,816,715 | 5,816,946 | 231    | Loss  |
| DEL00062858 | chr27 | 5,828,451 | 5,828,756 | 305    | Loss  |
| DEL00062867 | chr27 | 5,856,906 | 5,856,985 | 79     | Loss  |
| DUP00062908 | chr27 | 5,899,515 | 5,901,756 | 2,241  | Mixed |
| DEL00062985 | chr28 | 72,629    | 72,780    | 151    | Loss  |
| DEL00062987 | chr28 | 88,950    | 91,008    | 2,058  | Loss  |
| DEL00062994 | chr28 | 94,923    | 95,006    | 83     | Loss  |
| DEL00062999 | chr28 | 103,480   | 103,596   | 116    | Loss  |
| DEL00063001 | chr28 | 104,027   | 104,153   | 126    | Loss  |
| DEL00063002 | chr28 | 109,660   | 109,812   | 152    | Loss  |
| DEL00063071 | chr28 | 380,788   | 380,851   | 63     | Loss  |
| DEL00063080 | chr28 | 520,609   | 520,738   | 129    | Loss  |
| DEL00063085 | chr28 | 569,477   | 569,588   | 111    | Loss  |
| DEL00063092 | chr28 | 746,276   | 749,654   | 3,378  | Loss  |
| DUP00063107 | chr28 | 751,522   | 763,936   | 12,414 | Gain  |
| DUP00063209 | chr28 | 1,014,505 | 1,015,214 | 709    | Gain  |
| DUP00063229 | chr28 | 1,040,762 | 1,040,932 | 170    | Gain  |
| DEL00063234 | chr28 | 1,047,701 | 1,048,196 | 495    | Loss  |
| DEL00063246 | chr28 | 1,146,774 | 1,146,997 | 223    | Loss  |
| DEL00063248 | chr28 | 1,176,379 | 1,176,444 | 65     | Loss  |
| DEL00063270 | chr28 | 1,462,038 | 1,462,126 | 88     | Loss  |
| DEL00063275 | chr28 | 1,584,397 | 1,584,488 | 91     | Loss  |
| DEL00063281 | chr28 | 1,700,493 | 1,701,581 | 1,088  | Loss  |
| DEL00063288 | chr28 | 1,846,682 | 1,846,944 | 262    | Loss  |
| DEL00063289 | chr28 | 1,852,470 | 1,852,534 | 64     | Loss  |
| DUP00063308 | chr28 | 1,951,686 | 1,951,931 | 245    | Gain  |
| DEL00063383 | chr28 | 3,052,039 | 3,052,655 | 616    | Loss  |
| DEL00063391 | chr28 | 3,461,965 | 3,462,155 | 190    | Loss  |
| DUP00063400 | chr28 | 3,653,185 | 3,653,243 | 58     | Gain  |
| DEL00063426 | chr28 | 3,887,647 | 3,888,164 | 517    | Loss  |

|             |       |           |           |         |       |
|-------------|-------|-----------|-----------|---------|-------|
| DEL00063430 | chr28 | 3,933,372 | 3,933,510 | 138     | Loss  |
| DEL00063437 | chr28 | 3,995,033 | 3,995,093 | 60      | Loss  |
| DEL00063451 | chr28 | 4,089,912 | 4,089,995 | 83      | Loss  |
| DEL00063502 | chr28 | 4,423,933 | 4,424,029 | 96      | Loss  |
| DEL00063503 | chr28 | 4,430,123 | 4,430,255 | 132     | Loss  |
| DEL00063509 | chr28 | 4,452,318 | 4,452,538 | 220     | Loss  |
| DEL00063510 | chr28 | 4,463,662 | 4,463,714 | 52      | Loss  |
| DEL00063514 | chr28 | 4,465,569 | 4,465,981 | 412     | Loss  |
| DEL00063516 | chr28 | 4,467,595 | 4,467,823 | 228     | Loss  |
| DEL00063517 | chr28 | 4,468,180 | 4,469,156 | 976     | Loss  |
| DEL00063523 | chr28 | 4,508,669 | 4,509,053 | 384     | Loss  |
| DEL00063538 | chr28 | 4,630,405 | 4,630,628 | 223     | Loss  |
| DEL00063545 | chr28 | 4,720,813 | 4,721,368 | 555     | Loss  |
| DEL00063560 | chr28 | 4,932,506 | 4,932,611 | 105     | Loss  |
| DEL00063642 | chr28 | 5,175,771 | 5,175,921 | 150     | Loss  |
| DEL00063668 | chr28 | 5,177,980 | 5,180,222 | 2,242   | Loss  |
| DEL00064138 | chr30 | 92,455    | 92,574    | 119     | Loss  |
| DUP00064140 | chr30 | 92,724    | 93,863    | 1,139   | Mixed |
| DUP00064275 | chr30 | 309,706   | 310,173   | 467     | Gain  |
| DUP00064293 | chr30 | 362,257   | 362,565   | 308     | Gain  |
| DEL00064315 | chr30 | 432,443   | 432,763   | 320     | Loss  |
| DUP00064347 | chr30 | 492,220   | 492,719   | 499     | Gain  |
| DEL00064354 | chr30 | 493,311   | 494,271   | 960     | Loss  |
| DEL00064428 | chr30 | 553,892   | 553,946   | 54      | Loss  |
| DUP00064433 | chr30 | 574,549   | 574,906   | 357     | Mixed |
| DUP00064437 | chr30 | 580,838   | 581,092   | 254     | Gain  |
| DEL00064439 | chr30 | 581,326   | 581,536   | 210     | Loss  |
| DUP00064446 | chr30 | 622,337   | 622,894   | 557     | Gain  |
| DEL00064454 | chr30 | 665,789   | 666,557   | 768     | Loss  |
| DEL00064461 | chr30 | 673,493   | 673,883   | 390     | Loss  |
| DEL00064470 | chr30 | 689,399   | 689,481   | 82      | Loss  |
| DEL00064471 | chr30 | 711,468   | 711,539   | 71      | Loss  |
| DUP00064504 | chr30 | 899,941   | 900,125   | 184     | Gain  |
| DEL00064526 | chr30 | 942,629   | 942,995   | 366     | Loss  |
| DEL00064531 | chr30 | 949,634   | 950,730   | 1,096   | Mixed |
| DUP00064547 | chr30 | 956,151   | 956,462   | 311     | Gain  |
| DUP00064549 | chr30 | 972,703   | 973,121   | 418     | Gain  |
| DEL00064568 | chr31 | 420,550   | 420,750   | 200     | Loss  |
| DUP00064572 | chr31 | 441,876   | 442,001   | 125     | Gain  |
| DUP00064668 | chr31 | 598,970   | 792,135   | 193,165 | Mixed |
| DEL00065016 | chr31 | 800,983   | 801,294   | 311     | Loss  |
| DEL00065017 | chr31 | 811,527   | 811,678   | 151     | Loss  |
| DUP00065021 | chr31 | 823,673   | 880,148   | 56,475  | Mixed |
| DEL00065431 | chr31 | 927,196   | 927,302   | 106     | Loss  |
| DEL00065958 | chr31 | 1,026,458 | 1,026,516 | 58      | Loss  |
| DEL00066070 | chr31 | 1,131,404 | 1,131,799 | 395     | Loss  |
| DEL00066080 | chr31 | 1,131,897 | 1,133,187 | 1,290   | Loss  |
| DEL00066109 | chr31 | 1,152,598 | 1,152,793 | 195     | Loss  |
| DEL00066304 | chr31 | 1,341,258 | 1,395,307 | 54,049  | Mixed |

|             |       |           |           |         |       |
|-------------|-------|-----------|-----------|---------|-------|
| DUP00066325 | chr31 | 1,400,045 | 1,402,510 | 2,465   | Mixed |
| DEL00066480 | chr33 | 121,262   | 121,369   | 107     | Loss  |
| DUP00066656 | chr33 | 206,644   | 206,887   | 243     | Gain  |
| DUP00067066 | chr33 | 622,111   | 827,872   | 205,761 | Mixed |
| DUP00067558 | chr33 | 1,084,756 | 1,101,347 | 16,591  | Mixed |
| DUP00067650 | chr33 | 1,189,834 | 1,277,288 | 87,454  | Mixed |
| DUP00068049 | chr33 | 1,279,506 | 1,783,896 | 504,390 | Mixed |
| DEL00071454 | chr33 | 1,942,510 | 1,981,841 | 39,331  | Loss  |
| DEL00072822 | chr33 | 2,225,075 | 2,225,543 | 468     | Loss  |
| DEL00073333 | chr33 | 2,362,091 | 2,362,677 | 586     | Loss  |
| DUP00073694 | chr33 | 2,432,304 | 2,549,005 | 116,701 | Mixed |
| DEL00074944 | chr33 | 2,800,731 | 2,800,804 | 73      | Loss  |
| DEL00075205 | chr33 | 2,873,772 | 2,873,953 | 181     | Loss  |
| DEL00075709 | chr33 | 3,077,041 | 3,077,109 | 68      | Loss  |
| DEL00075923 | chr33 | 3,173,496 | 3,173,589 | 93      | Loss  |
| DEL00076000 | chr33 | 3,207,997 | 3,208,049 | 52      | Loss  |
| DEL00076059 | chr33 | 3,258,670 | 3,258,895 | 225     | Loss  |
| DEL00076121 | chr33 | 3,302,202 | 3,303,876 | 1,674   | Loss  |
| DUP00076158 | chr33 | 3,322,422 | 3,490,687 | 168,265 | Gain  |
| DEL00076308 | chr33 | 3,513,377 | 3,513,998 | 621     | Loss  |
| DEL00076429 | chr34 | 35,174    | 35,829    | 655     | Loss  |
| DUP00076494 | chr34 | 41,814    | 42,180    | 366     | Gain  |
| DUP00076562 | chr34 | 122,970   | 123,550   | 580     | Gain  |
| DEL00076615 | chr34 | 660,080   | 660,421   | 341     | Loss  |
| DUP00076634 | chr34 | 813,745   | 814,600   | 855     | Gain  |
| DEL00076709 | chr34 | 1,338,933 | 1,339,266 | 333     | Loss  |
| DUP00076716 | chr34 | 1,355,981 | 1,356,068 | 87      | Gain  |
| DEL00076717 | chr34 | 1,367,808 | 1,367,998 | 190     | Loss  |
| DEL00076728 | chr34 | 1,441,300 | 1,441,533 | 233     | Loss  |
| DUP00076731 | chr34 | 1,445,805 | 1,446,255 | 450     | Gain  |
| DUP00076733 | chr34 | 1,446,650 | 1,447,012 | 362     | Gain  |
| DEL00076739 | chr34 | 1,471,136 | 1,471,544 | 408     | Loss  |
| DUP00076752 | chr34 | 1,481,659 | 1,482,088 | 429     | Gain  |
| DEL00076763 | chr34 | 1,493,265 | 1,493,392 | 127     | Loss  |
| DUP00076779 | chr34 | 1,629,775 | 1,630,204 | 429     | Mixed |
| DEL00076793 | chr34 | 1,631,056 | 1,631,143 | 87      | Loss  |
| DUP00076820 | chr34 | 1,777,846 | 1,794,562 | 16,716  | Gain  |
| DEL00076835 | chr34 | 1,995,945 | 1,996,076 | 131     | Loss  |
| DEL00076842 | chr34 | 2,068,933 | 2,069,006 | 73      | Loss  |
| DEL00076848 | chr34 | 2,076,047 | 2,076,356 | 309     | Loss  |
| DUP00076852 | chr34 | 2,091,134 | 2,091,754 | 620     | Gain  |
| DEL00076871 | chr34 | 2,095,047 | 2,095,498 | 451     | Loss  |
| DEL00076881 | chr34 | 2,107,498 | 2,107,575 | 77      | Loss  |
| DEL00076893 | chr34 | 2,112,595 | 2,114,053 | 1,458   | Loss  |
| DUP00076907 | chr34 | 2,126,387 | 2,126,831 | 444     | Gain  |
| DUP00076912 | chr34 | 2,132,568 | 2,133,016 | 448     | Gain  |
| DEL00076922 | chr34 | 2,135,601 | 2,135,771 | 170     | Loss  |
| DUP00076956 | chr34 | 2,144,838 | 2,145,399 | 561     | Gain  |
| DEL00076971 | chr34 | 2,150,907 | 2,151,437 | 530     | Loss  |

|             |       |           |           |        |       |
|-------------|-------|-----------|-----------|--------|-------|
| DEL00076978 | chr34 | 2,170,942 | 2,171,076 | 134    | Loss  |
| DUP00077327 | chr35 | 227,002   | 228,798   | 1,796  | Gain  |
| DEL00077337 | chr35 | 229,488   | 244,839   | 15,351 | Loss  |
| DEL00077952 | chr36 | 286,904   | 287,410   | 506    | Loss  |
| DUP00077956 | chr36 | 290,818   | 291,284   | 466    | Gain  |
| DEL00077959 | chr36 | 291,968   | 293,025   | 1,057  | Mixed |
| DEL00078107 | chr36 | 323,495   | 324,954   | 1,459  | Loss  |
| DEL00078135 | chr36 | 347,000   | 350,094   | 3,094  | Loss  |
| DEL00078145 | chr36 | 366,859   | 367,580   | 721    | Loss  |
| DUP00078209 | chr36 | 431,550   | 431,776   | 226    | Gain  |
| DEL00078331 | chr38 | 8,995     | 9,472     | 477    | Loss  |
| DUP00078425 | chr38 | 180,696   | 181,061   | 365    | Gain  |
| DUP00078435 | chr38 | 201,468   | 201,884   | 416    | Gain  |

---
